# Supplementary material for: Wing Plasticity Is Associated with Growth and Energy Metabolism in Two Color Morphs of the Pea Aphid
Source: MDPI journal article supplement (doi:10.3390/insects15040279), 2024-04-16
Supplement: s1 [file s1]

**Supplementary Materials for**  
**Wing Plasticity Is Associated with Growth and Energy**  
**Metabolism in Two Color Morphs of the Pea Aphid**

Hehe Cao, Xi Wang, Jiawei Wang, Zhaozhi Lu, and Tongxian Liu

Corresponding authors: zhaozhi@qau.edu.cn (Z.L.); tx.liu@gzu.edu.cn (T.L.)

**The PDF file includes:**

Figures S1 and S2

**Other Supplementary Material for this manuscript includes the following:**

Table S1 All differentially expressed genes between red and green morph aphids (Excel format)

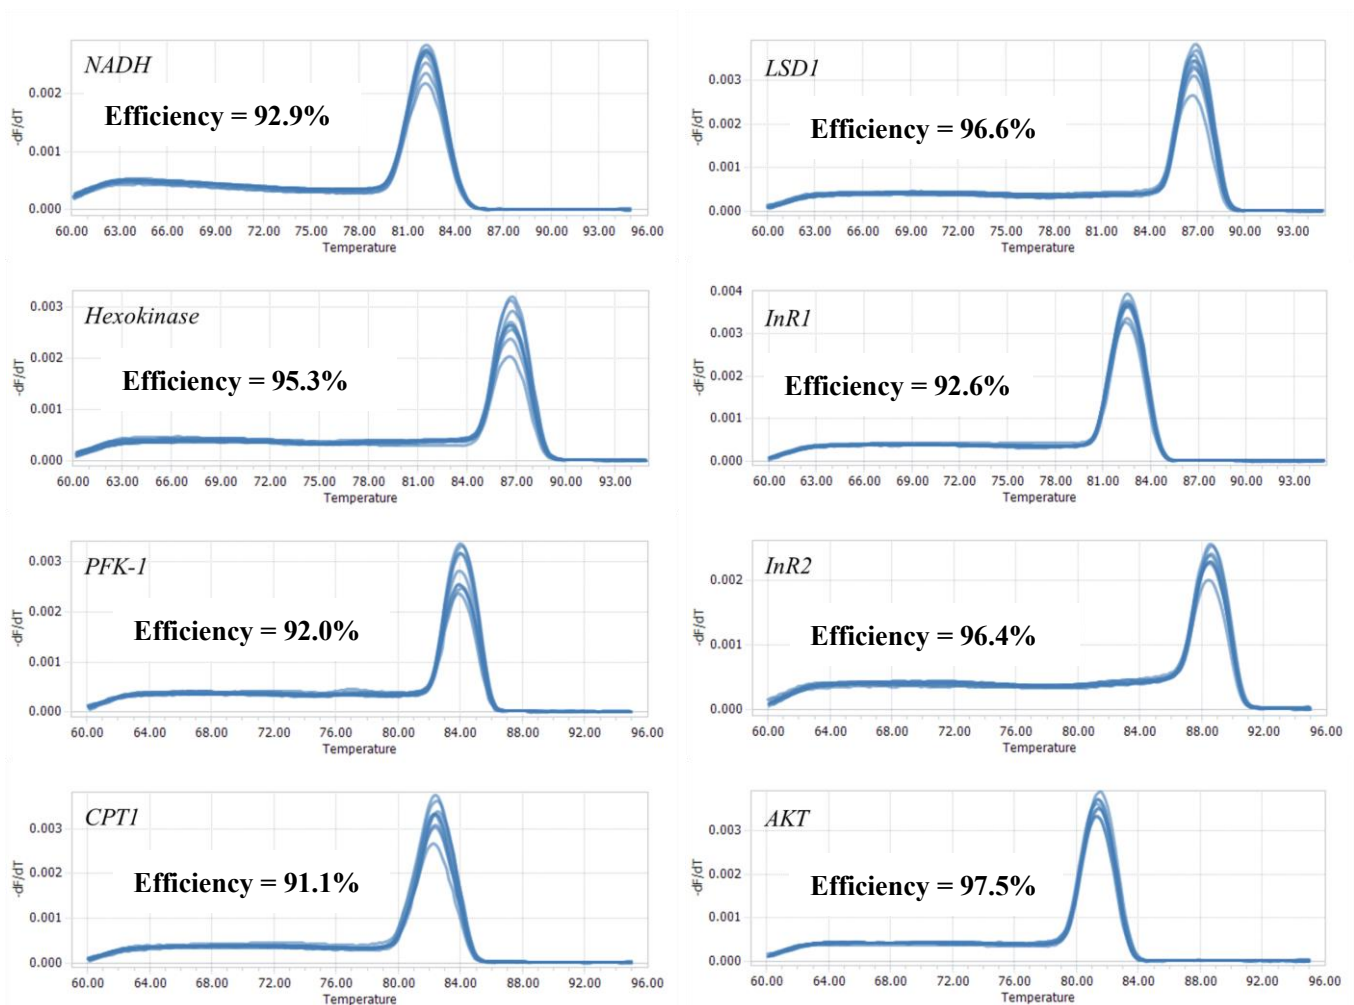

**Figure S1.** Amplification efficiency and melt curves for primers used in this study.

The amplification efficiency ranges from 91.1% to 97.5%, suggesting that the PCR efficiencies for primers is suitable. The melt curve for each gene has only one peak, suggesting that the primers is specific for amplification.

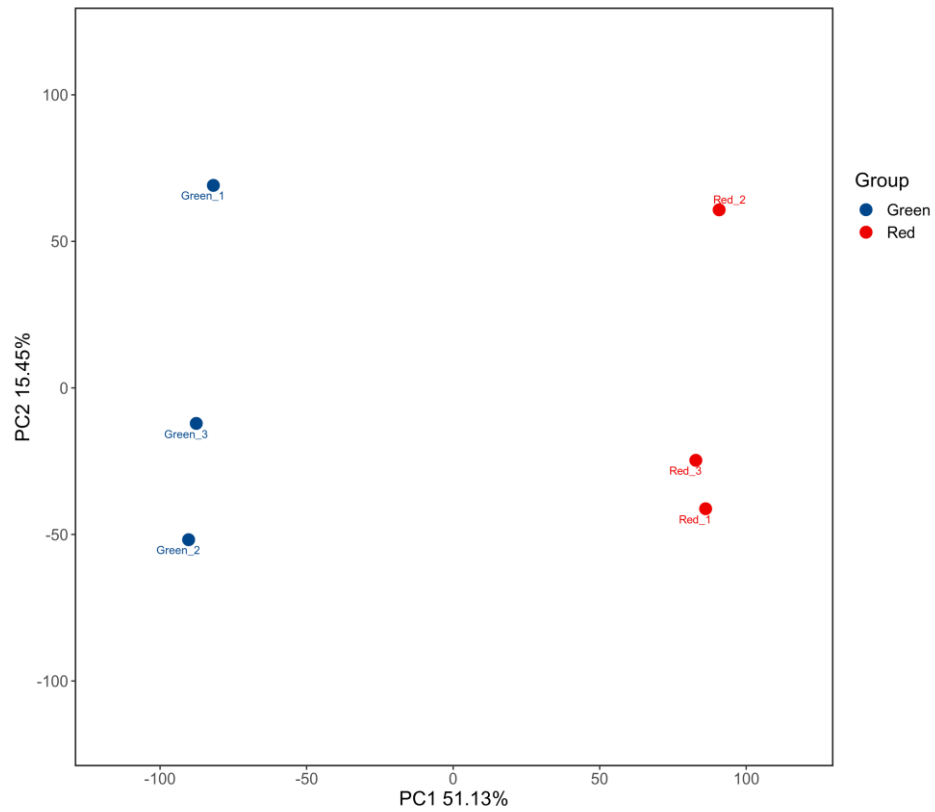

**Figure S2.** Principal component analysis (PCA) of all differentially expressed genes between green and red morph aphids. Principal component axis 1 explained ~51% of the variance, indicated a large effect of aphid color on gene expression. Principal component axis 2 exhibits 15% of the variance, suggested that different samples within each color aphid had a small variance.
