# Supplementary material for: Wing Plasticity Is Associated with Growth and Energy Metabolism in Two Color Morphs of the Pea Aphid
Source: Insects. 2024 Apr 16;15(4):279. doi: 10.3390/insects15040279 (PMC11050552; doi:10.3390/insects15040279)
Supplement: Supplementary file 1 [file insects-15-00279-s001.zip › Table S1 all_differentially expressed genes.xls]

gene_id	Green_1_fpkm	Green_2_fpkm	Green_3_fpkm	Red_1_fpkm	Red_2_fpkm	Red_3_fpkm	RleafvsGleaf_log2FoldChange	RleafvsGleaf_pvalue	RleafvsGleaf_padj	gene_name	gene_chr	gene_start	gene_end	gene_strand	gene_length	gene_biotype	gene_description	tf_family
100169280	5610.029169	5680.296044	5547.784506	6360.8733	5909.972307	6311.531014	0.14909868	0.003630088	0.012308596	LOC100169280	NC_042495.1	48957542	48960803	+	1461	protein_coding	actin	Actin
100160480	2085.348081	2262.073763	2209.842508	3988.722308	3695.424883	3993.661165	0.839640905	6.71E-50	5.57E-48	cprr1-8	NC_042495.1	79252803	79254771	-	1127	protein_coding	RR1 cuticle protein 8%2C transcript variant X1	Chitin_bind_4
100574365	4028.570475	4223.954486	3979.99662	3488.828355	3562.937396	3590.355244	-0.194052152	5.69E-05	0.000288406	LOC100574365	NC_042494.1	98061869	98064142	-	1934	protein_coding	elongation factor 1-alpha	GTP_EFTU
100167736	1921.213702	1841.363147	1837.362881	3328.654808	3066.091009	3276.137406	0.795028243	3.21E-48	2.49E-46	LOC100167736	NC_042494.1	10765930	10769923	-	2425	protein_coding	calphotin	-
100160737	1368.931162	1842.495894	1584.275984	3282.564832	3009.660122	3455.515712	1.030769375	9.19E-30	3.33E-28	LOC100160737	NC_042496.1	2828608	2830407	-	612	protein_coding	cuticle protein-like%2C transcript variant X1	-
100159024	1056.475951	1267.712735	1234.000395	3688.467414	2793.968725	3286.872023	1.464531061	5.89E-55	5.66E-53	LOC100159024	NC_042496.1	5046592	5048161	-	712	protein_coding	cuticle protein 16.5	-
100169171	2147.949382	1950.393309	2087.535208	2829.154447	2593.536251	2783.376078	0.414412522	7.86E-12	9.22E-11	LOC100169171	NC_042495.1	79134920	79137250	-	1034	protein_coding	cuticular protein-like	Chitin_bind_4
100574707	1466.928422	1811.010061	1721.020666	2848.834338	2248.129656	2691.936897	0.647208601	1.67E-12	2.09E-11	ACYPI38370	NW_021767935.1	1350	4083	+	638	protein_coding	uncharacterized LOC100574707	-
100165074	1851.358791	2087.552898	1958.411615	2456.061055	2241.751993	2533.369506	0.301275969	3.84E-06	2.32E-05	LOC100165074	NC_042495.1	56143622	56146929	+	1327	protein_coding	myosin light chain-like	-
100159045	2383.998575	2758.959259	2722.456876	2093.255101	1922.744643	2298.48803	-0.309715136	5.25E-05	0.000268297	LOC100159045	NC_042495.1	97422566	97423585	-	594	protein_coding	ribosomal protein L23-like	-
100159449	1998.371682	2342.686912	2300.178524	1961.074872	1837.026086	2035.376351	-0.179913222	0.010018025	0.029776634	LOC100159449	NC_042494.1	17527690	17528735	-	617	protein_coding	40S ribosomal protein S23-like	Ribosomal_S12
100159472	2285.56382	2720.470878	2561.457293	1492.186022	1823.887766	1719.327856	-0.580720048	7.01E-13	9.05E-12	LOC100159472	NC_042495.1	105640146	105643330	-	1125	protein_coding	osiris 6-like	-
100164538	1007.804065	989.1255785	992.8857735	1874.968721	1821.483965	1889.088632	0.908436021	8.74E-84	1.81E-81	LOC100164538	NC_042494.1	10984133	10987534	+	2120	protein_coding	calphotin	-
7055885	1829.368146	1990.158824	1913.203411	1583.020984	1721.100833	1599.171585	-0.21853823	0.000111189	0.000532715	CYTB	NC_011594.1	10297	11412	+	1116	protein_coding	-	-
100164113	679.2803956	919.0420065	828.8563433	2001.170614	1656.229725	2000.773064	1.228621753	3.20E-35	1.47E-33	LOC100164113	NC_042496.1	2821037	2822560	-	595	protein_coding	cuticle protein-like%2C transcript variant X1	-
100165293	455.1984118	403.932379	449.6501513	2044.406835	1654.304347	1858.349845	2.092875308	3.43E-150	2.58E-147	cprr1-11	NC_042495.1	66499688	66502462	+	1005	protein_coding	RR1 cuticle protein 11	Chitin_bind_4
100161508	1998.186113	2542.914503	2307.274534	1330.073871	1642.252874	1504.353424	-0.606222784	1.16E-11	1.33E-10	LOC100161508	NC_042495.1	105612218	105615584	-	1295	protein_coding	uncharacterized LOC100161508	-
100165466	1949.182949	2311.894159	2270.940358	1739.29611	1628.544772	1981.684547	-0.280947579	0.000658189	0.002687435	LOC100165466	NC_042494.1	52707603	52709549	+	462	protein_coding	ribosomal protein L35e-like	-
100166296	1877.794918	2184.224268	2083.868238	1741.691073	1613.970822	1851.500439	-0.231969562	0.001064128	0.00414026	Rpl27a	NC_042494.1	78002736	78005292	+	610	protein_coding	ribosomal protein L27a	-
100163341	1772.22432	2062.580098	1991.271865	1714.023539	1599.915384	1834.367272	-0.171276161	0.016046163	0.044704277	LOC100163341	NC_042494.1	130397785	130398891	+	790	protein_coding	ribosomal protein L10Ae-like	-
100164214	1368.495882	1423.667481	1447.394084	1634.598211	1575.665043	1611.173368	0.192504347	9.35E-05	0.000454372	LOC100164214	NC_042494.1	83352701	83357461	-	1022	protein_coding	uncharacterized LOC100164214	-
100162441	1804.275902	2044.123058	1933.729258	1698.677851	1544.728956	1721.544949	-0.212697446	0.001038238	0.004050513	LOC100162441	NC_042495.1	93107244	93115479	-	1042	protein_coding	60S ribosomal protein L5	-
100162124	1725.159076	1962.938606	1931.649198	1648.978573	1542.226644	1640.837511	-0.210733826	0.000765089	0.003071454	Rps6	NC_042495.1	63281278	63285006	-	871	protein_coding	ribosomal protein S6	-
100167382	1680.645487	1907.29162	1828.185368	1589.574286	1509.211901	1598.193622	-0.19841211	0.00096217	0.003782746	LOC100167382	NC_042494.1	92194627	92197203	+	739	protein_coding	60S ribosomal protein L17	-
100165946	1760.286731	1945.793723	1852.593033	1575.333035	1509.051732	1603.616413	-0.238724871	2.11E-05	0.000114799	LOC100165946	NC_042496.1	21538559	21541685	-	731	protein_coding	60S ribosomal protein L18-like	-
100165109	1668.387816	1937.739689	1803.736723	1608.818698	1502.752565	1659.930094	-0.173998617	0.008790018	0.02668215	LOC100165109	NC_042495.1	12326236	12327784	-	740	protein_coding	ribosomal protein L19e-like	-
100167532	1658.576418	1858.854813	1813.203634	1516.827581	1450.994955	1531.321179	-0.237572566	4.44E-05	0.000229964	LOC100167532	NC_042494.1	67237207	67239035	+	1007	protein_coding	40S ribosomal protein S2-like	-
100144802	1290.673492	1371.588888	1334.798042	1659.472793	1437.290909	1518.63667	0.214583381	0.000716809	0.002902746	Mlc1	NC_042494.1	161524036	161527416	+	1020	protein_coding	myosin alkali light chain 1%2C transcript variant 1	-
100162386	1688.872879	1889.438737	1824.746537	1556.62783	1419.506821	1583.434872	-0.237775944	0.000193889	0.00088359	LOC100162386	NC_042495.1	116510619	116513099	-	786	protein_coding	peptidyl-prolyl cis-trans isomerase-like	Pro_isomerase
100159065	1549.06891	1690.002052	1579.338715	1313.65128	1403.791121	1379.481908	-0.227088502	3.23E-05	0.000171481	LOC100159065	NC_042494.1	38754263	38757999	-	2305	protein_coding	heat shock 70 kDa protein cognate 4	HSP70
100168765	1505.160561	1636.859767	1606.111713	1448.863654	1362.775506	1471.601573	-0.141629258	0.011742147	0.034192663	LOC100168765	NC_042494.1	82955452	82961058	+	1434	protein_coding	60S ribosomal protein L3	-
100158660	1500.747793	1674.456305	1609.645879	1418.926274	1359.761854	1448.511538	-0.17170588	0.00284209	0.009902752	LOC100158660	NC_042494.1	136163969	136169491	+	997	protein_coding	40S ribosomal protein S4	Ribosomal_S4e
100169515	1521.354127	1792.344903	1702.329515	1416.121722	1324.640054	1454.833639	-0.250486298	0.000240185	0.001073789	Rps3a	NC_042494.1	148636806	148640344	+	1053	protein_coding	ribosomal protein S3A	-
100161322	1440.854403	1575.238485	1527.275678	1326.849822	1322.976353	1362.061359	-0.17247291	0.001101252	0.004269955	Rps10b	NC_042494.1	91118167	91120296	+	678	protein_coding	ribosomal protein S10b	-
100145843	1382.992001	1597.071084	1689.12638	1378.503771	1308.656585	1420.376031	-0.17771374	0.015801185	0.044115252	Rpl27	NC_042494.1	87316637	87322655	+	607	protein_coding	ribosomal protein L27	-
100160224	1432.453705	1615.599056	1541.147163	1372.858468	1288.534256	1417.327366	-0.163035626	0.008391947	0.025647964	Rpl22	NC_042495.1	7907754	7913056	-	1453	protein_coding	ribosomal protein L22	-
100145831	1423.636362	1599.12266	1704.549357	1384.010665	1275.210914	1443.214611	-0.197393419	0.007567022	0.023500965	Rps17	NC_042495.1	78201751	78204528	-	558	protein_coding	ribosomal protein S17	-
100168081	1397.382519	1553.24327	1508.600433	1311.663596	1263.183983	1405.278812	-0.156935479	0.011752168	0.034215531	LOC100168081	NC_042494.1	24888346	24889699	-	623	protein_coding	ribosomal protein L35Ae-like	-
100167379	1142.818261	1133.938705	1101.238998	1319.239132	1248.116179	1263.033318	0.188172414	0.000150997	0.000702737	LOC100167379	NC_042495.1	97058572	97087636	-	7734	protein_coding	myosin heavy chain 1%2C transcript variant X3	Myosin_head
100145837	1453.625253	1636.242579	1580.224697	1305.593556	1239.03739	1367.719102	-0.248336478	6.56E-05	0.000329145	Rplp0	NC_042494.1	94725700	94729321	+	1136	protein_coding	ribosomal protein LP0	-
100166754	1486.857648	1747.466264	1660.057575	1308.734785	1238.90736	1420.118765	-0.295650186	3.99E-05	0.000207687	LOC100166754	NC_042496.1	33637158	33640048	-	1001	protein_coding	ribosomal protein L7Ae-like	-
100145849	1398.146169	1572.994694	1609.668155	1339.963355	1234.838732	1318.992832	-0.227259717	0.000558091	0.002323833	Rps26	NC_042495.1	54766923	54768084	+	563	protein_coding	ribosomal protein S26	-
100168822	501.4834477	619.0176124	553.3613252	1545.84806	1229.4825	1384.416899	1.320733408	4.08E-50	3.43E-48	LOC100168822	NC_042495.1	109018612	109025161	+	1980	protein_coding	cuticle protein	Chitin_bind_4
100168232	1590.416114	2114.120895	1913.0422	1129.071879	1221.964413	1209.616251	-0.650504321	3.79E-14	5.48E-13	LOC100168232	NC_042494.1	7002724	7004870	-	905	protein_coding	apolipoprotein D	Lipocalin_2
100144868	1323.996935	1591.331373	1582.433339	1291.613879	1216.427635	1295.024779	-0.234779518	0.001332383	0.005056774	Rpl14	NC_042494.1	149335758	149337781	-	585	protein_coding	ribosomal protein L14	-
100164050	1456.267316	1677.97543	1595.227579	1302.175771	1214.697226	1360.770821	-0.279364069	2.87E-05	0.00015292	LOC100164050	NC_042496.1	39125767	39130235	-	1022	protein_coding	60S ribosomal protein L6	-
100145839	1590.677624	1824.051636	1812.358649	1357.838094	1198.881333	1490.58791	-0.361894737	9.04E-06	5.21E-05	Rps18	NC_042494.1	97132809	97138302	+	579	protein_coding	ribosomal protein S18	-
100168780	1376.743876	1521.873029	1538.273801	1235.506342	1190.931593	1370.891075	-0.217531743	0.001505034	0.005640125	LOC100168780	NC_042494.1	70111343	70113968	-	669	protein_coding	40S ribosomal protein S24	Ribosomal_S24e
100158873	1651.690208	1671.475389	1726.628841	1400.527242	1180.064777	1354.935509	-0.352691194	2.61E-07	1.84E-06	LOC100158873	NC_042494.1	161991686	161993149	+	975	protein_coding	uncharacterized protein LOC100158873	-
100159536	1301.569015	1559.664141	1663.082165	1274.453813	1172.14964	1339.035489	-0.249899535	0.003157877	0.010871006	LOC100159536	NC_042494.1	153049033	153050772	-	583	protein_coding	ribosomal protein L44e-like%2C transcript variant X1	-
100144887	1346.127007	1577.177511	1562.356838	1268.150403	1169.371844	1366.892679	-0.230461375	0.002458706	0.008711208	Rpl31	NC_042495.1	115764963	115766873	+	604	protein_coding	ribosomal protein L31	Ribosomal_L31e
100159410	1319.504087	1477.80942	1446.786472	1244.383668	1163.379363	1313.974347	-0.182401456	0.004941658	0.016178571	LOC100159410	NC_042494.1	155636749	155639479	-	1011	protein_coding	40S ribosomal protein S9%2C transcript variant X2	-
100166592	1371.446214	1537.481874	1418.834437	1265.701971	1158.296152	1209.491368	-0.245153123	6.24E-05	0.000314357	Rpl10	NC_042495.1	86651293	86655242	+	866	protein_coding	ribosomal protein L10	-
100572810	1267.617409	1466.094197	1389.407029	1249.385007	1142.204094	1246.395283	-0.173416141	0.009058811	0.027374231	LOC100572810	NC_042494.1	108567992	108571365	-	674	protein_coding	60S ribosomal protein L26	KOW
100165315	1349.742974	1497.965161	1430.83044	1231.667533	1139.987685	1259.547143	-0.229600612	0.000170063	0.000782927	LOC100165315	NC_042494.1	19923174	19925793	+	994	protein_coding	ribosomal protein L13-like%2C transcript variant X1	-
100162480	1320.116463	1470.085211	1417.855652	1236.698312	1129.425621	1257.328566	-0.208695911	0.000940492	0.003706757	LOC100162480	NC_042495.1	86662210	86667077	+	828	protein_coding	60S ribosomal protein L13a	-
100165741	1142.283161	831.0236615	1047.291545	1372.363173	1126.108085	1324.793046	0.346342687	0.0008007	0.003192479	LOC100165741	NC_042494.1	62412030	62414700	+	843	protein_coding	cuticular protein	Chitin_bind_4
100145848	1285.655854	1565.102066	1500.363099	1127.332089	1100.568221	1268.824202	-0.308181108	0.000104749	0.000504618	Rpl24	NC_042495.1	87502703	87507830	+	600	protein_coding	ribosomal protein L24	-
100162964	1240.462484	1406.964494	1356.538448	1179.282998	1100.334087	1185.774635	-0.20128314	0.00118477	0.004564619	LOC100162964	NC_042496.1	29957324	29960827	-	869	protein_coding	60S ribosomal protein L9-like%2C transcript variant X1	-
100160215	1292.714155	1436.850601	1381.247148	1133.087807	1093.623597	1218.105041	-0.247964617	6.13E-05	0.000309341	LOC100160215	NC_042494.1	156790453	156792632	+	1002	protein_coding	40S ribosomal protein S5	-
100166785	1238.011189	1395.27311	1346.804244	1156.312899	1092.23857	1205.335671	-0.197493902	0.001522704	0.005699573	LOC100166785	NC_042494.1	72429242	72433489	-	1482	protein_coding	neurofilament heavy polypeptide	-
100145834	1183.504963	1334.349644	1328.323698	1115.754525	1081.191854	1215.405184	-0.165578786	0.013564377	0.038705947	Rpl40	NC_042494.1	50553702	50555547	-	639	protein_coding	ribosomal protein L40	ubiquitin
100168431	1204.663522	1376.505449	1406.893604	1136.528607	1074.013528	1180.161256	-0.226946868	0.000969248	0.003807727	LOC100168431	NC_042494.1	123934813	123936977	+	653	protein_coding	ribosomal protein S20-like	Ribosomal_S10
100159571	1189.074754	1347.235769	1316.617602	1101.198733	1066.664839	1114.845815	-0.223952404	0.000180565	0.000827172	LOC100159571	NC_042495.1	2913738	2920345	-	769	protein_coding	ribosomal protein S15A-like	-
100167508	1251.760521	1491.628553	1401.066846	1123.920976	1057.50774	1200.625023	-0.286091164	8.72E-05	0.000426343	LOC100167508	NC_042495.1	35868543	35872994	-	694	protein_coding	ribosomal protein L11e-like	-
100159647	989.8371254	1035.791383	975.8977279	1132.316856	1054.446854	1099.824907	0.137849099	0.008952752	0.027100456	LOC100159647	NC_042495.1	49809724	49823710	+	3191	protein_coding	paramyosin%2C long form	Myosin_tail_1
100144893	1181.428122	1375.56002	1423.716475	1147.374273	1049.733748	1205.171104	-0.219307462	0.004620974	0.015226631	LOC100144893	NC_042494.1	9420596	9422952	-	544	protein_coding	ribosomal protein L30-like protein	-
100169357	1144.140849	1255.788099	1187.136287	1047.420863	1038.319038	1058.018537	-0.183308553	0.000438905	0.001868483	LOC100169357	NC_042495.1	115538322	115541790	+	1811	protein_coding	neurofilament heavy polypeptide	-
100159746	336.9818709	357.7701653	340.1342155	1117.103273	1034.033988	1099.259481	1.658119906	1.56E-195	2.46E-192	cp68	NC_042494.1	59428787	59430126	+	1004	protein_coding	cuticular protein 68%2C transcript variant X1	Chitin_bind_4
100169376	286.4491039	368.714381	321.1500952	1261.989037	1029.964218	1190.450972	1.842179505	9.49E-89	2.14E-86	LOC100169376	NC_042493.1	86136444	86138338	+	686	protein_coding	uncharacterized LOC100169376	-
100145820	1190.385462	1395.014003	1390.588125	1136.10259	1027.144152	1190.388915	-0.23837674	0.001699882	0.00629114	Rpl18a	NC_042495.1	104403890	104406042	-	689	protein_coding	ribosomal protein L18A	-
100167446	1223.81895	1386.832774	1319.348735	1119.739883	1025.997356	1134.017905	-0.253818693	7.35E-05	0.000365167	LOC100167446	NC_042494.1	122391261	122393716	-	1198	protein_coding	60S ribosomal protein L8-like%2C transcript variant X1	Ribosomal_L2_C
100159560	786.6274285	804.0229661	787.5299919	995.8805621	1024.260501	1031.418255	0.366515359	3.01E-15	4.78E-14	LOC100159560	NC_042495.1	94198846	94220490	-	1559	protein_coding	cystathionase-like	Cys_Met_Meta_PP
100163081	1103.930387	1200.155883	1141.202772	1010.974541	979.3043841	1061.796512	-0.167850226	0.002784441	0.009716903	LOC100163081	NC_042496.1	13793796	13797563	-	1124	protein_coding	guanine nucleotide-binding protein subunit beta-like protein	WD40
100164974	1077.75241	1221.100144	1246.350691	1053.032065	961.6652516	1092.412131	-0.18314214	0.009806968	0.029265092	Rps3	NC_042495.1	56053859	56054667	+	747	protein_coding	ribosomal protein S3	-
100165965	1077.13156	1235.68056	1163.216369	1041.152745	961.4519379	1056.992358	-0.176957757	0.006276455	0.019936305	Rpl15	NC_042494.1	66639555	66644822	+	1279	protein_coding	ribosomal protein L15	-
100572399	612.1437437	812.3548539	705.1818992	1162.980062	956.3799336	1043.573083	0.578173494	9.43E-10	8.99E-09	LOC100572399	NC_042494.1	43212251	43214027	-	873	protein_coding	cuticle protein 16.5	-
100169007	813.2296074	912.8124568	851.5722536	925.5308607	952.0562133	960.8063513	0.146063924	0.0103792	0.03070554	LOC100169007	NC_042494.1	99285834	99290165	-	863	protein_coding	thioredoxin-like	-
100158967	994.4518609	1149.426244	1201.234183	1000.056813	941.6219629	996.8426749	-0.179736515	0.012203495	0.035392377	Rps14	NC_042494.1	37195973	37199023	-	613	protein_coding	ribosomal protein S14	-
100165389	1041.645446	1196.971747	1244.04377	1042.144275	937.6201425	1071.136541	-0.183739856	0.015742883	0.043975826	rpl28	NC_042494.1	85720200	85723764	+	569	protein_coding	ribosomal protein L28	-
100166950	634.0447923	478.3592938	550.0054044	976.8843779	923.9034338	951.8614492	0.785336553	1.13E-19	2.41E-18	LOC100166950	NC_042496.1	33103781	33107656	-	2248	protein_coding	MAGE-like protein 2	-
100164819	1113.229033	1122.77523	1105.725151	925.7258733	906.6748137	933.1933508	-0.266165172	5.87E-09	5.11E-08	LOC100164819	NC_042495.1	88309305	88319644	+	1952	protein_coding	enolase%2C transcript variant X2	-
100169243	655.5099952	727.1312735	683.9247058	752.1940389	905.6342898	833.1220767	0.276330005	0.000105601	0.000508102	LOC100169243	NC_042494.1	118603582	118611959	-	3694	protein_coding	uncharacterized LOC100169243	-
100574469	50.68888062	51.78452797	41.75345282	903.3158723	896.6902209	986.5306892	4.277303198	0	0	LOC100574469	NW_021773259.1	7016	7768	-	753	protein_coding	heat shock 70 kDa protein cognate 4	HSP70
100164760	740.9734244	764.3100763	776.0149824	1118.846385	891.2080751	1089.753751	0.449371647	1.61E-08	1.32E-07	LOC100164760	NC_042494.1	59060956	59064007	-	1221	protein_coding	RNA-binding protein 14	-
100166359	996.0914254	1129.264	1212.777233	943.9646212	889.5872622	1025.364812	-0.21642231	0.005636947	0.018183217	Rps27-1	NC_042494.1	63702017	63705361	+	579	protein_coding	ribosomal protein S27-1	-
100164630	788.1804209	816.61825	797.0995645	877.9435589	889.3577237	915.6405587	0.16650331	0.000517772	0.002173735	LOC100164630	NC_042494.1	57866745	57868591	+	1234	protein_coding	uncharacterized LOC100164630	-
100159953	551.394642	635.0982326	646.1531847	1035.677341	887.240866	1044.039753	0.702309915	6.68E-19	1.37E-17	LOC100159953	NC_042494.1	10129515	10132878	-	989	protein_coding	holotricin-3	-
100167299	751.1790865	761.7690024	748.651751	847.5233038	882.8892082	899.6479851	0.224549403	3.22E-06	1.98E-05	LOC100167299	NC_042495.1	5635695	5660294	+	2697	protein_coding	ornithine decarboxylase 1%2C transcript variant X2	-
100167924	978.9077843	1149.877939	1096.481306	943.7859867	865.5961204	986.5701864	-0.198883434	0.005812129	0.018675756	LOC100167924	NC_042496.1	5073860	5076352	-	743	protein_coding	ribosomal protein S13e-like	-
100569038	224.8874128	223.4793834	251.5310524	922.7007659	840.9073485	983.7550715	1.980008388	4.42E-156	4.10E-153	LOC100569038	NC_042496.1	37502460	37504082	-	527	lncRNA	uncharacterized LOC100569038	-
100169216	918.3062815	993.4861239	1003.86987	899.8309781	832.7372168	880.8904236	-0.150777324	0.009948133	0.029613527	LOC100169216	NC_042494.1	94782186	94785508	+	736	protein_coding	40S ribosomal protein S16-like	-
100144894	1034.357783	1221.10313	1262.026408	923.5202509	832.7227114	906.8365143	-0.394160314	3.22E-07	2.24E-06	LOC100144894	NC_042495.1	12327957	12333350	+	561	protein_coding	ribosomal protein P2-like	-
100144892	963.2851324	1100.449173	1174.97431	936.800036	812.3445812	985.5101471	-0.236840169	0.00533931	0.017325852	Rps25-2	NC_042494.1	64480871	64481885	+	530	protein_coding	ribosomal protein S25 homolog 2	-
100162473	878.3735662	1081.741459	1224.946008	865.0123748	811.817865	963.0966858	-0.263492809	0.00880762	0.026727797	LOC100162473	NC_042494.1	70190901	70193232	-	437	protein_coding	40S ribosomal protein S21	-
100162499	1249.933986	963.7719164	1139.36996	736.5103835	807.2765653	781.6851581	-0.521717927	9.55E-10	9.10E-09	cprr1-7	NC_042495.1	79269290	79271517	-	767	protein_coding	RR1 cuticle protein 7	Chitin_bind_4
100144895	646.1614405	728.7671944	738.1041853	782.3389821	777.8098875	867.1254271	0.20712395	0.002711539	0.009496106	LOC100144895	NC_042496.1	2563199	2564493	+	687	protein_coding	cytochrome c-like protein	-
100165751	604.8536817	632.9298005	642.4987666	898.2195643	768.6304487	868.3754615	0.438201771	3.66E-11	4.01E-10	LOC100165751	NC_042494.1	77377538	77388694	-	2453	protein_coding	muscle LIM protein 1%2C transcript variant X1	LIM
100160292	1348.820309	925.2991599	1227.648004	918.376961	761.9147584	846.9321165	-0.464239956	0.008721325	0.026506712	cp16	NC_042494.1	62654426	62655788	+	893	protein_coding	cuticular protein 16	Chitin_bind_4
100161411	850.0911255	912.4606905	921.9180432	795.5666893	760.8175161	814.6553423	-0.172097149	0.002104663	0.0076002	LOC100161411	NC_042495.1	51090692	51093396	-	960	protein_coding	translation initiation factor 5a-like	-
100144870	846.7211731	985.631177	1004.485663	813.077075	760.0724611	850.3316715	-0.219995674	0.00271231	0.009496695	Rps12	NC_042494.1	61542905	61543678	-	707	protein_coding	ribosomal protein S12	-
100168075	878.0275294	1009.278359	973.8625137	829.590835	747.5300396	835.115984	-0.239040723	0.000544454	0.002274252	LOC100168075	NC_042495.1	108248752	108251988	+	588	protein_coding	ribosomal protein S15-like	-
100164957	706.35521	676.6054462	693.7995495	742.1206581	744.0942986	760.3162176	0.120076382	0.014213829	0.04029678	LOC100164957	NC_042494.1	145530502	145536289	-	1211	protein_coding	ornithine decarboxylase antizyme 1	-
100168754	173.7050995	222.1363888	195.6696532	931.3521125	743.5212544	777.4407479	2.059255256	6.88E-103	2.31E-100	LOC100168754	NC_042494.1	43313537	43315176	+	821	protein_coding	uncharacterized LOC100168754	-
100169422	868.0702525	993.0808939	946.5413461	795.1261658	740.5192801	831.6020812	-0.239047179	0.000335601	0.001458618	LOC100169422	NC_042496.1	20251873	20257433	+	911	protein_coding	40S ribosomal protein S7-like%2C transcript variant X1	-
100167769	648.8451179	645.7900884	640.6197686	820.3613813	735.6615162	750.8079362	0.260296315	5.00E-06	2.97E-05	LOC100167769	NC_042495.1	106468390	106490907	-	4135	protein_coding	calcium-transporting ATPase sarcoplasmic/endoplasmic reticulum type%2C transcript variant X3	E1-E2_ATPase
100161248	774.4593744	821.0918687	810.2468812	728.8716724	731.9028922	745.0139232	-0.118284517	0.013943561	0.039637397	LOC100161248	NC_042495.1	53317057	53322576	+	2557	protein_coding	eukaryotic initiation factor 4A%2C transcript variant X2	DEAD
100145851	253.6668435	172.4164501	210.7821478	845.9835667	718.0739304	821.5283453	1.911443354	5.70E-27	1.80E-25	ORF5	NC_042494.1	67947233	67949422	-	812	protein_coding	chemosensory protein-like	-
100144916	770.8563673	868.689363	884.8656771	745.8845097	715.4575006	752.5987015	-0.182166936	0.004220322	0.014020641	Rpl12	NC_042495.1	78632796	78634716	+	716	protein_coding	ribosomal protein L12	-
100570018	211.4610068	123.4820017	174.0518082	886.580455	714.3244799	864.3402838	2.281982557	1.74E-21	4.18E-20	LOC100570018	NC_042496.1	6392030	6394189	+	1278	protein_coding	protein takeout	-
100166283	782.9181358	945.1147252	861.0744398	732.4185558	713.8005378	728.3873624	-0.244493509	0.00028769	0.001265018	Hsc70-3	NC_042496.1	33503882	33507987	-	2584	protein_coding	heat shock protein cognate 3	HSP70
100160340	819.8036334	916.3954552	927.2955136	767.7112031	705.7385121	768.5173813	-0.241426476	0.000181285	0.000829864	LOC100160340	NC_042494.1	69885175	69889088	+	1246	protein_coding	ribosomal protein S19e-like	-
100160266	1399.094269	1615.635081	1584.184147	687.615953	704.1764566	721.6660878	-1.114590876	3.92E-69	5.52E-67	LOC100160266	NC_042495.1	98644640	98650460	-	827	protein_coding	40S ribosomal protein S8	-
100158866	253.2117431	325.5918284	334.5990229	787.0600601	697.7371425	837.0339474	1.353486834	1.61E-44	1.11E-42	LOC100158866	NC_042494.1	142743672	142749200	-	788	protein_coding	40S ribosomal protein S8-like	-
100168004	870.7895153	941.7249926	900.5504006	758.9916073	695.2179699	792.7553517	-0.264936692	2.30E-05	0.000124292	LOC100168004	NC_042495.1	48250255	48252982	-	1422	protein_coding	uncharacterized LOC100168004	-
100159585	778.3452814	824.8823555	792.5063979	705.2042024	693.2256911	732.5827231	-0.162000206	0.001350475	0.005119279	LOC100159585	NC_042494.1	86211143	86218298	+	2586	protein_coding	polyadenylate-binding protein 4-like	RRM_1
100162956	1009.738627	795.5544459	984.9333548	757.4260976	684.4389607	709.7838354	-0.368453311	1.73E-05	9.55E-05	cp1	NC_042494.1	62592113	62593331	+	803	protein_coding	cuticular protein 1	Chitin_bind_4
100144913	417.4099199	415.9012096	421.1061971	641.1538162	661.3159007	670.1465635	0.65987994	1.06E-42	6.82E-41	LOC100144913	NC_042494.1	150744368	150751500	+	1385	protein_coding	diacetyl/L-xylulose reductase	-
100159968	595.6875011	708.136666	655.5399511	854.031054	658.8565172	788.4277705	0.239429327	0.007717619	0.023914962	LOC100159968	NC_042494.1	58989661	58994889	-	1538	protein_coding	AT-rich interactive domain-containing protein 1A	-
100169317	276.9565795	255.4773852	251.4436918	805.3516933	654.9155738	757.2599216	1.506945507	1.50E-81	2.79E-79	LOC100169317	NC_042496.1	27475637	27478400	-	985	protein_coding	keratin-associated protein 6-2	-
100159612	597.0101686	640.1584219	638.2991897	727.0158769	645.5849636	711.7381476	0.159396202	0.009728787	0.029064775	LOC100159612	NC_042494.1	73599740	73607096	-	2301	protein_coding	tropomyosin-1%2C transcript variant X2	-
100145825	566.4870641	593.9789598	576.4481589	622.4969655	642.5877939	627.8139142	0.13096789	0.006584648	0.020796903	LOC100145825	NC_042496.1	36921842	36928796	-	1476	protein_coding	mitochondrial malate dehydrogenase	-
100167366	692.0091319	780.062127	781.246116	658.6169511	628.1360602	671.0552104	-0.195696444	0.00163505	0.006072548	LOC100167366	NC_042494.1	28513134	28522049	+	1560	protein_coding	60S ribosomal protein L4	-
100161763	815.7366866	977.2616627	909.017677	621.1647864	619.0092542	735.1764254	-0.444805813	5.34E-08	4.15E-07	LOC100161763	NC_042494.1	160310304	160314343	+	843	protein_coding	ribosomal protein LP1-like	-
100145829	670.3197223	753.8796023	785.6396666	604.9410897	616.5889685	669.0803661	-0.217984184	0.001928336	0.007032505	LOC100145829	NC_042495.1	67550527	67552235	+	626	protein_coding	ribosomal protein S15-like	-
100168039	758.6428697	774.897352	771.72647	640.6005836	611.6680407	645.4681489	-0.273763873	2.56E-08	2.07E-07	LOC100168039	NC_042495.1	95444520	95451062	+	1612	protein_coding	leukocyte elastase inhibitor	Serpin
100160667	1634.423417	1143.204987	1349.488682	503.6725199	602.4538479	553.460235	-1.308318851	1.01E-14	1.53E-13	LOC100160667	NC_042493.1	31727775	31729948	+	1250	protein_coding	tetra-peptide repeat homeobox protein 1-like	-
100161407	696.5974351	818.5717539	817.4875383	604.8745797	601.4169044	685.6168365	-0.29498916	0.000116689	0.000557033	LOC100161407	NC_042495.1	115654346	115657209	-	825	protein_coding	ribosomal protein S30-like	Ribosomal_S30
100144867	673.2222893	754.0995058	730.3009773	639.3807667	581.0567195	651.9117153	-0.197475703	0.002543668	0.008977954	Awd2	NC_042495.1	39062043	39064240	-	964	protein_coding	abnormal wing discs 2	NDK
100165786	723.1159037	705.0674637	638.4512111	528.6295226	564.6214318	554.0615052	-0.320549552	2.82E-07	1.98E-06	LOC100165786	NC_042493.1	108956891	108959342	+	1152	protein_coding	elongation factor 1-alpha 2	GTP_EFTU
100164372	482.7369433	523.0552376	497.0945399	557.1157074	564.3049441	568.5305776	0.176216505	0.000690627	0.002805361	LOC100164372	NC_042496.1	37160458	37164288	+	1133	protein_coding	muscular protein 20	CH
100161568	135.5379317	115.2736358	127.4197866	633.9386651	542.1372182	604.9933614	2.241941729	2.45E-181	3.22E-178	LOC100161568	NC_042495.1	96701923	96706929	+	1174	protein_coding	pollen-specific leucine-rich repeat extensin-like protein 1	Chitin_bind_4
100160356	143.373435	81.25895292	113.9187823	569.2952833	540.62606	559.2592486	2.307488247	4.79E-23	1.26E-21	LOC100160356	NC_042494.1	42191889	42199596	-	2056	protein_coding	fatty acyl-CoA reductase wat	NAD_binding_4
100160032	419.6847502	436.5268888	424.8951164	569.9396912	538.0745341	565.5465711	0.392462873	1.13E-14	1.70E-13	Idgf	NC_042494.1	8636092	8645040	-	1871	protein_coding	imaginal disk growth factor	-
100145855	79.82996465	67.64927477	77.2132492	476.8250847	537.2905354	508.2561121	2.766660721	1.75E-289	9.21E-286	ORF1	NC_042494.1	114671313	114672676	+	778	protein_coding	chemosensory protein-like	-
100164072	598.6399345	559.4653147	580.1685552	460.3353013	523.6946345	495.8622695	-0.225584275	0.000256574	0.001140595	LOC100164072	NC_042493.1	31455695	31463117	-	2164	protein_coding	cytochrome P450 4g15	p450
100169556	559.5353266	625.2789616	604.4601973	520.9721325	516.6118466	557.2465014	-0.158912964	0.009579813	0.028706687	LOC100169556	NC_042494.1	26833327	26838405	-	721	protein_coding	40S ribosomal protein S7-like	-
100163560	806.2511481	973.8255463	931.1866086	427.1639557	516.4587429	478.616614	-0.923766246	8.41E-30	3.06E-28	LOC100163560	NC_042495.1	105536481	105540386	-	2647	protein_coding	uncharacterized LOC100163560	-
100169118	367.3780769	415.020343	489.1222183	529.518024	510.5569051	518.5134837	0.301039594	0.000541163	0.002262903	LOC100169118	NC_042494.1	142581521	142583475	+	659	protein_coding	cytochrome c oxidase subunit NDUFA4	-
100167791	380.4407602	424.7620509	391.2789185	523.1445586	491.9068527	488.4833024	0.336657224	1.71E-08	1.41E-07	LOC100167791	NC_042495.1	16395991	16401883	-	2151	protein_coding	6-phosphogluconate dehydrogenase%2C decarboxylating	NAD_binding_2
100168864	539.5540226	595.9133482	625.9987174	495.5443122	483.9780079	519.5244789	-0.225628763	0.00053715	0.002246718	LOC100168864	NC_042494.1	64699610	64701780	+	1066	protein_coding	peptidyl-prolyl cis-trans isomerase FKBP1A-like%2C transcript variant X1	FKBP_C
100159055	121.7827369	46.56351792	78.89577246	453.2039878	482.4498118	490.4040634	2.533033587	5.09E-11	5.48E-10	LOC100159055	NC_042494.1	132637870	132648073	+	2120	protein_coding	alpha-tocopherol transfer protein	-
100167906	212.9495372	221.2171056	213.0218499	556.4584197	476.3643492	537.0730214	1.28538381	5.01E-81	9.09E-79	LOC100167906	NC_042495.1	99180168	99187942	+	1071	protein_coding	glutathione S-transferase	GST_C
100574486	24.47788473	29.25868601	28.86293577	353.6442518	468.8547252	420.6516753	3.918991574	0	0	LOC100574486	NC_042495.1	108885101	108888375	+	3056	lncRNA	uncharacterized LOC100574486	-
100160934	1010.203927	737.7070624	927.1362889	569.6239914	467.2423943	528.6359108	-0.766556477	8.88E-14	1.24E-12	cp17	NC_042494.1	62491629	62492432	-	675	protein_coding	cuticular protein 17	Chitin_bind_4
100163800	552.2296914	633.4232056	648.757956	498.7791812	465.4278607	534.8563137	-0.284039128	0.000174544	0.000802383	LOC100163800	NC_042494.1	142198697	142200589	-	515	protein_coding	protein transport protein Sec61 subunit gamma	-
100164067	133.1452041	185.4490763	146.339904	578.6551633	463.787827	532.3207941	1.767688604	8.45E-62	1.03E-59	LOC100164067	NC_042493.1	60349065	60352299	-	873	protein_coding	uncharacterized LOC100164067%2C transcript variant X2	-
100159087	345.971159	388.6006252	367.5943879	445.1693109	459.2872854	472.6950441	0.328388895	2.80E-08	2.24E-07	LOC100159087	NC_042494.1	112033116	112035273	+	1148	protein_coding	uncharacterized LOC100159087	-
100162231	94.39910016	17.49066464	53.64177811	442.7470102	458.846776	477.4719593	3.062616167	1.56E-07	1.14E-06	LOC100162231	NC_042496.1	6343543	6346956	-	1619	protein_coding	protein takeout	-
100165540	498.2898255	544.4234855	515.2899021	471.143088	454.0986129	466.9762517	-0.155289713	0.00361329	0.012254271	LOC100165540	NC_042495.1	52684748	52692690	+	1897	protein_coding	protein krasavietz	-
100302478	539.3200176	607.9945615	608.8138021	419.1152332	449.3434575	466.3183463	-0.388732174	7.77E-09	6.68E-08	NV10	NW_021771487.1	27156	29424	-	636	protein_coding	uncharacterized LOC100302478	-
100169187	605.8972003	652.2289961	646.9082654	474.1547009	443.3652779	477.1824616	-0.442823391	8.66E-15	1.32E-13	LOC100169187	NC_042495.1	89155340	89157649	+	998	protein_coding	uncharacterized LOC100169187%2C transcript variant X1	-
100160640	365.5353905	388.0824732	399.1208745	471.1736949	442.6506893	459.136433	0.25936239	7.46E-06	4.35E-05	LOC100160640	NC_042494.1	16952367	16953282	+	779	protein_coding	coiled-coil-helix-coiled-coil-helix domain containing 2-like	-
100166436	504.8768354	595.6629645	592.0341434	490.9437824	438.5793354	507.1280522	-0.229221669	0.003467249	0.01182763	LOC100166436	NC_042494.1	161942632	161945029	+	615	protein_coding	60S acidic ribosomal protein P1	-
100165459	349.7883764	349.8046777	349.5537287	389.2629121	437.6466066	419.9931577	0.255853047	6.96E-06	4.07E-05	LOC100165459	NC_042496.1	40269132	40273039	-	2404	protein_coding	polyubiquitin-C	ubiquitin
100570172	93.62861611	105.0605785	98.24616084	494.7895021	432.6987215	495.8783482	2.26826792	6.96E-223	1.83E-219	LOC100570172	NC_042495.1	108984223	108987126	+	1435	protein_coding	skin secretory protein xP2	Chitin_bind_4
100163169	553.244806	546.9146849	596.4645855	479.4359062	427.924706	506.6342656	-0.256007863	0.000268182	0.001187511	LOC100163169	NC_042494.1	17740707	17788161	-	2017	protein_coding	40S ribosomal protein SA	-
100302430	351.7974393	361.560624	368.2193659	422.8512458	424.8481319	437.6552802	0.255960148	4.50E-07	3.08E-06	LOC100302430	NC_042494.1	63400028	63436446	+	1032	protein_coding	kazal-type proteinase inhibitor	-
100158668	474.018548	583.3264967	555.2651094	459.5524968	424.8439668	447.9725907	-0.268065107	0.000382108	0.001642648	LOC100158668	NC_042494.1	158349762	158353914	+	1087	protein_coding	uncharacterized protein LOC100158668	-
100164058	400.4752743	350.3899056	358.7330078	412.0888486	420.747758	418.1357001	0.179500123	0.004219476	0.014020641	LOC100164058	NC_042495.1	87641260	87653379	+	2442	protein_coding	S-adenosylmethionine synthase%2C transcript variant X4	-
100144785	372.5479641	376.4869079	377.2371465	414.2915204	417.3226844	430.0080777	0.170551901	0.000282999	0.001246127	Catb-16a	NC_042493.1	125335237	125386456	-	2511	protein_coding	cathepsin B-16A	Peptidase_C1
100165735	466.1098748	545.3476988	496.6879391	420.5269808	411.1321487	427.7186873	-0.252919978	7.80E-05	0.000385687	Phgdp	NC_042495.1	58094331	58101547	+	1321	protein_coding	phosphoglycerate dehydrogenase	2-Hacid_dh_C
100169524	312.3573743	294.6911298	291.9354162	389.3889552	409.6575796	411.3430662	0.435693118	1.47E-15	2.39E-14	LOC100169524	NC_042494.1	15261668	15279195	-	2252	protein_coding	hexokinase type 2%2C transcript variant X2	-
100575432	116.6265759	114.2222001	125.7254569	459.9153252	407.3539251	420.7340034	1.860196927	9.72E-153	8.07E-150	LOC100575432	NC_042496.1	37558368	37559810	+	605	lncRNA	uncharacterized LOC100575432	-
100168726	327.439143	335.7232175	323.603677	397.6384123	406.3338328	385.586674	0.276491859	5.90E-08	4.56E-07	LOC100168726	NC_042493.1	77870299	77874220	+	1279	protein_coding	ferritin-like	Ferritin
100145844	451.5557626	520.8282356	531.0117218	454.070337	404.339916	456.0661733	-0.186479878	0.012804722	0.036871709	Rps27a	NC_042495.1	92447615	92449686	+	915	protein_coding	ribosomal protein S27A	ubiquitin
100160371	465.0828542	558.965394	534.9436171	427.1513759	401.5803017	438.6292731	-0.291463614	9.34E-05	0.000454018	LOC100160371	NC_042493.1	69236274	69239602	-	469	protein_coding	protein transport protein Sec61 subunit beta	-
100167369	94.86800794	46.30987616	65.07704319	514.1489093	401.5742006	461.9681769	2.745398301	4.83E-18	9.33E-17	LOC100167369	NC_042494.1	70438459	70449361	+	3251	protein_coding	tyrosine 3-monooxygenase	-
100164294	305.308928	324.1008986	309.5806549	332.1371059	398.0578621	378.2656803	0.246153223	0.000425262	0.001816779	LOC100164294	NC_042496.1	11306440	11317126	-	1592	protein_coding	neural/ectodermal development factor IMP-L2%2C transcript variant X2	-
100159939	106.9757616	134.1044849	122.2006941	469.1444627	397.4042749	475.6157478	1.892867184	1.29E-102	4.22E-100	LOC100159939	NC_042495.1	108974317	108977727	+	1540	protein_coding	helicase SRCAP	Chitin_bind_4
100161355	433.9119035	448.3973067	439.2622419	404.2523269	395.3414116	403.6696905	-0.128403183	0.00576769	0.018559421	LOC100161355	NC_042496.1	8374474	8379377	+	2981	protein_coding	V-type proton ATPase catalytic subunit A%2C transcript variant X1	ATP-synt_ab
100158914	1180.993977	850.7727177	1055.957132	325.6022337	393.4856229	381.8121497	-1.481825921	1.38E-46	1.03E-44	cp29	NC_042494.1	62454793	62456577	+	975	protein_coding	cuticular protein 29	Chitin_bind_4
100167427	290.0919551	332.1815502	342.6705257	365.0487581	392.5791012	393.547834	0.261772711	0.000193484	0.000882253	LOC100167427	NC_042494.1	79263043	79264659	+	1032	protein_coding	uncharacterized LOC100167427	-
100162393	185.2505584	207.7324799	194.919625	365.3784185	391.4803746	374.428003	0.951355401	4.03E-57	4.07E-55	LOC100162393	NC_042493.1	16887760	16894078	+	1636	protein_coding	GPI-anchored CFEM domain protein A	-
100159778	355.7199407	376.4336004	351.741957	406.5262165	389.9521739	413.0739381	0.165177789	0.001745789	0.006443009	LOC100159778	NC_042495.1	50742512	50766781	-	3664	protein_coding	glycogen phosphorylase%2C transcript variant X1	-
100159527	160.5170294	182.4259171	166.5823169	449.0615525	386.9043934	408.5485485	1.295572787	9.32E-71	1.37E-68	LOC100159527	NC_042495.1	96697910	96700900	+	994	protein_coding	pupal cuticle protein 27	Chitin_bind_4
100166105	346.3039237	360.4464245	363.5186209	395.4454662	380.7508444	386.3617043	0.126346173	0.014685053	0.041402086	LOC100166105	NC_042495.1	52264071	52265224	-	994	protein_coding	cytochrome c oxidase subunit Va-like	-
100159063	345.3035555	355.0157966	337.5780704	373.209593	380.0818813	377.2363675	0.130136152	0.008397731	0.025656661	LOC100159063	NC_042494.1	135778406	135783030	-	1424	protein_coding	uncharacterized protein LOC100159063	-
100161691	351.0401912	368.8396988	365.6553527	446.5806729	378.2035904	433.2477676	0.219808701	0.001463703	0.00550485	LOC100161691	NC_042495.1	72194573	72196321	-	1206	protein_coding	adenine nucleotide translocator-like	Mito_carr
100166657	327.7428599	349.1360968	341.4602263	370.5132304	375.8394254	384.7521555	0.158469679	0.002033364	0.007364643	LOC100166657	NC_042493.1	77865170	77869986	-	1383	protein_coding	uncharacterized LOC100166657%2C transcript variant X1	Ferritin
100144902	454.0115387	508.1514238	502.0026899	360.9643255	371.2501202	368.3927004	-0.404599444	3.90E-11	4.26E-10	LOC100144902	NC_042494.1	30531390	30533736	+	531	protein_coding	ribosomal protein S28e-like%2C transcript variant X1	-
100569946	237.0031322	278.2236592	262.7977658	335.1410313	371.1259135	377.2058467	0.484870273	1.22E-11	1.39E-10	ACYPI39568	NC_042495.1	117682625	117683990	+	1366	protein_coding	uncharacterized LOC100569946	-
100575965	3.267472041	2.836329256	4.33631668	654.6620235	368.059042	386.8567448	7.087550402	1.45E-88	3.22E-86	LOC100575965	NC_042494.1	166848631	166850021	+	397	protein_coding	uncharacterized LOC100575965	-
100165393	262.7899473	313.6162761	303.7942064	323.8417038	365.2404784	343.1026203	0.237020685	0.001624392	0.006034386	LOC100165393	NC_042494.1	79257625	79258929	+	877	protein_coding	uncharacterized LOC100165393	-
100164027	654.5476323	746.8480586	721.3006434	255.8473432	364.8368234	334.0671885	-1.145914345	1.71E-29	6.13E-28	cp47	NC_042494.1	27640992	27643091	+	1251	protein_coding	cuticular protein 47	Chitin_bind_4
100166712	149.1367899	191.3397364	175.2497523	474.9821569	364.4235451	417.2223667	1.292562382	1.19E-37	6.26E-36	LOC100166712	NC_042496.1	35061424	35063368	-	699	protein_coding	adhesive plaque matrix protein	-
100165874	298.2517601	312.9347541	305.6649773	350.6988736	363.7517641	374.0209456	0.254420554	1.20E-06	7.82E-06	LOC100165874	NC_042496.1	41142452	41146452	+	1384	protein_coding	probable Bax inhibitor 1	-
100169107	400.2741233	445.181052	411.6915155	356.9900794	359.4105262	360.8791053	-0.215743578	8.42E-05	0.000413049	LOC100169107	NC_042494.1	64814575	64821455	+	2926	protein_coding	protein disulfide-isomerase	-
100169293	409.0009177	434.084352	405.9453543	371.2502199	359.2692582	357.8804618	-0.19164378	0.000181311	0.000829864	LOC100169293	NC_042494.1	65443995	65451848	-	4041	protein_coding	staphylococcal nuclease domain-containing protein 1	-
100161385	270.5892128	281.4839485	283.356809	374.0130675	356.3677165	358.3936844	0.389104661	2.10E-14	3.09E-13	Mf	NC_042494.1	68275087	68286557	-	2399	protein_coding	myofilin%2C transcript variant 2	-
100163748	435.6739358	458.4178966	449.9740646	370.8110403	353.5739234	375.3199834	-0.28253605	3.89E-08	3.06E-07	LOC100163748	NC_042494.1	98046650	98052348	+	2386	protein_coding	heat shock 70 kDa protein cognate 4	HSP70
100167781	749.2140213	848.6886773	801.4548625	90.48782403	352.4081534	239.8922914	-1.807043051	0.000179342	0.000822442	LOC100167781	NC_042494.1	66739093	66745561	-	1757	protein_coding	uncharacterized LOC100167781	-
100160421	291.5561663	306.4392934	306.3186392	339.0231143	350.8856053	340.2682132	0.194985973	0.000159913	0.000741171	LOC100160421	NC_042493.1	85160682	85169035	-	1170	protein_coding	uncharacterized LOC100160421	-
100164598	382.9081175	445.3036932	396.6588626	365.0458211	348.7145435	362.0143645	-0.180115215	0.005128187	0.016726776	LOC100164598	NC_042494.1	85960523	85965817	+	1985	protein_coding	protein disulfide-isomerase A3	-
100167863	286.2271245	311.7445313	310.0361571	336.9358876	342.3039455	354.8428957	0.194641547	0.000658629	0.002688534	LOC100167863	NC_042495.1	8729468	8734863	+	1023	protein_coding	uncharacterized LOC100167863	-
100168188	332.5147003	413.861577	377.7609403	292.3224474	342.1167542	302.5048608	-0.255623724	0.001937836	0.007057534	LOC100168188	NC_042493.1	88976353	88984526	+	1991	protein_coding	uncharacterized LOC100168188	-
100169245	0	0	0	372.3284775	339.8298265	346.2247253	16.79083337	5.61E-46	4.06E-44	tor	NW_021771109.1	41647	48834	+	2473	protein_coding	carotene dehydrogenase	Amino_oxidase
100167255	321.535571	288.039946	290.2776396	330.9691194	338.9359699	322.7449318	0.148173424	0.013542596	0.038664772	LOC100167255	NC_042494.1	66960224	66988997	+	9012	protein_coding	fatty acid synthase%2C transcript variant X3	Acyl_transf_1
100162905	406.7865	458.66365	439.3368753	378.3139836	338.4055587	367.3489723	-0.26019693	6.84E-05	0.000341367	Ran	NC_042495.1	93445853	93448884	+	1449	protein_coding	GTP-binding nuclear protein Ran	Ras
100144800	242.1236405	254.772229	259.456016	331.1268814	332.3690646	341.4000936	0.416957408	5.91E-15	9.10E-14	Awd1	NC_042494.1	105404783	105408863	+	1147	protein_coding	abnormal wing discs 1	NDK
100568915	67.38630651	65.37683909	74.21078902	344.2018237	327.0292221	362.0171156	2.327353345	2.64E-214	5.21E-211	LOC100568915	NC_042496.1	37496915	37498522	+	525	lncRNA	uncharacterized LOC100568915	-
100161842	394.6613845	443.9535325	422.5480652	342.9646684	326.0994193	348.3794142	-0.302714005	3.75E-07	2.59E-06	LOC100161842	NC_042495.1	92435024	92441134	+	2097	protein_coding	46 kDa FK506-binding nuclear protein	FKBP_C
100144774	277.6248198	273.673211	274.0323126	358.0585776	322.0756377	354.7318502	0.333238096	1.21E-08	1.01E-07	S1	NC_042496.1	16893110	16901245	-	2026	protein_coding	sucrase	-
100162324	504.9289867	531.693782	506.4348567	261.5639778	314.3777629	290.3933517	-0.826026669	8.77E-33	3.61E-31	LOC100162324	NC_042495.1	49544857	49572110	-	1331	protein_coding	FK506-binding protein 1	FKBP_C
100160720	219.1511314	212.0219621	215.7512525	268.4998151	313.3255373	294.8571003	0.445078585	3.75E-12	4.52E-11	LOC100160720	NC_042495.1	86716331	86733712	+	2622	protein_coding	UDP-glucose pyrophosphorylase 2-like%2C transcript variant 1	-
100165781	359.9008854	382.9235494	362.8969641	333.3025742	312.0934222	315.4180432	-0.195663104	0.000346086	0.001500879	LOC100165781	NC_042495.1	89344047	89354821	+	1727	protein_coding	heterogeneous nuclear ribonucleoprotein-like%2C transcript variant X1	RRM_1
100168384	239.2765098	262.5083629	260.0898102	307.7973718	309.8966287	331.5905802	0.324384619	1.53E-07	1.12E-06	LOC100168384	NC_042495.1	40119554	40122164	+	815	protein_coding	peroxiredoxin-5%2C mitochondrial	-
100162512	371.5151656	407.8500157	395.5596107	343.5429308	309.2560006	315.1570354	-0.272429911	1.06E-05	6.03E-05	LOC100162512	NC_042494.1	62902240	62909514	+	2245	protein_coding	heterogeneous nuclear ribonucleoprotein 87F%2C transcript variant X2	RRM_1
100159524	274.687153	294.1091606	283.0988771	327.2482074	306.6615836	328.7687556	0.18337798	0.001750043	0.00645556	LOC100159524	NC_042495.1	107376629	107377503	+	747	protein_coding	nuclear protein 1	-
100159797	88.76153276	63.84607088	74.08436716	320.041474	306.661125	317.9016519	2.065006945	4.91E-105	1.84E-102	LOC100159797	NC_042494.1	147548708	147556101	+	2232	protein_coding	fatty acyl-CoA reductase wat	NAD_binding_4
100160017	361.449461	395.6585037	375.5252521	315.0685444	306.2912458	319.2449205	-0.261002242	2.03E-06	1.28E-05	LOC100160017	NC_042495.1	71825644	71827473	+	1404	protein_coding	leucine-rich repeat-containing protein 59	-
100159700	411.3724408	502.943868	457.591936	254.0991945	306.0409793	288.9713467	-0.685097841	8.49E-17	1.52E-15	LOC100159700	NC_042494.1	113212313	113249525	+	2513	protein_coding	acidic repeat-containing protein%2C transcript variant X1	-
100160293	194.5182441	199.8182096	190.6280951	272.9842842	304.6305943	274.9383569	0.550213611	3.81E-20	8.47E-19	LOC100160293	NC_042494.1	11607850	11615022	-	2271	protein_coding	phosphoglucomutase	PGM_PMM_III
100162182	349.1866306	377.0558117	355.0002592	335.5339688	302.9051084	315.8755548	-0.173103661	0.003813042	0.012840632	LOC100162182	NC_042496.1	33445109	33452700	-	1678	protein_coding	serine-arginine protein 55%2C transcript variant X1	RRM_1
100161240	827.9302203	490.3155906	658.7395973	258.3429979	302.5248251	282.4197139	-1.223489226	5.95E-08	4.59E-07	LOC100161240	NC_042494.1	98868654	98870323	-	1670	protein_coding	zinc finger protein 512B	-
100163891	740.2041197	500.0262518	663.2047869	303.0147501	293.7918101	287.519399	-1.099822065	1.43E-24	4.06E-23	cp41	NC_042494.1	62662529	62663645	+	779	protein_coding	cuticular protein 41	Chitin_bind_4
100158974	342.216733	394.6308709	364.86526	276.3883487	289.8139005	295.752034	-0.347005112	4.45E-08	3.49E-07	LOC100158974	NC_042494.1	142236152	142244524	+	1615	protein_coding	uncharacterized LOC100158974%2C transcript variant X1	-
100165870	339.4408037	305.232573	328.7117608	240.2703145	285.661434	268.4950247	-0.286633038	9.49E-05	0.000460038	LOC100165870	NC_042494.1	100258127	100264632	-	1157	transcribed_pseudogene	uncharacterized LOC100165870	-
100161123	256.3508894	256.1675288	251.2868717	293.3130158	283.5605563	294.0842558	0.196180695	8.06E-05	0.000396786	LOC100161123	NC_042494.1	62870267	62880196	-	1699	protein_coding	short/branched chain specific acyl-CoA dehydrogenase%2C mitochondrial	-
100166545	221.0499574	230.1161445	231.9118242	265.1174644	277.9543437	245.4933173	0.214217078	0.000616761	0.002537325	LOC100166545	NC_042493.1	91217855	91224700	-	1041	protein_coding	uncharacterized LOC100166545	-
100163010	211.6735269	188.0988639	189.0383357	289.1517165	272.3131774	276.1477512	0.515015473	9.39E-16	1.56E-14	LOC100163010	NC_042495.1	64437871	64454316	-	2385	protein_coding	NADP-dependent malic enzyme	Malic_M
100158770	225.6057347	242.5583773	264.0891492	288.6975776	270.8838284	287.0537684	0.216645945	0.001456588	0.005482009	Uqcrb	NC_042494.1	133744436	133745701	+	1055	protein_coding	ubiquinol-cytochrome c reductase binding protein	-
100163548	218.8668412	240.5635387	233.3131056	295.9725601	269.6637664	292.2484826	0.315600293	5.11E-07	3.47E-06	LOC100163548	NC_042494.1	110374001	110375809	+	1053	protein_coding	S-methyl-5'-thioadenosine phosphorylase	-
100159685	62.79460606	21.79037788	39.36756972	308.6898102	267.9678882	295.8714959	2.820369898	2.25E-11	2.52E-10	LOC100159685	NC_042496.1	6375453	6377601	+	1267	protein_coding	takeout-like	-
100167036	350.6098079	282.852714	309.5860854	242.6319904	264.4926595	251.6616478	-0.30733464	7.67E-05	0.000379563	Cpap3-c	NC_042495.1	116361034	116373665	-	2531	protein_coding	cuticular protein analogous to peritrophins 3-C%2C transcript variant X1	CBM_14
100158996	139.2357949	159.6332468	149.4030956	229.3575237	259.185204	248.9740378	0.725371336	1.40E-25	4.13E-24	LOC100158996	NC_042495.1	58740906	58747693	-	1306	protein_coding	diacylglycerol o-acyltransferase-like	-
100169141	405.1998003	332.7657879	373.2777126	269.0817536	258.7018028	273.4135532	-0.465544333	5.08E-10	4.98E-09	Cpap3-d1	NC_042494.1	84296357	84300734	-	1006	protein_coding	cuticular protein analogous to peritrophins 3-D1	CBM_14
100163001	185.0190812	196.597899	191.4957734	263.3648309	258.6590992	263.048234	0.460996269	1.06E-19	2.27E-18	LOC100163001	NC_042494.1	169523183	169528334	-	1934	protein_coding	thioredoxin reductase 1%2C mitochondrial%2C transcript variant X2	Pyr_redox_2
100164380	175.0333382	186.9662751	190.5165428	230.1396705	255.2693239	244.5820208	0.408876742	3.01E-11	3.33E-10	LOC100164380	NC_042494.1	84181662	84186306	+	1451	protein_coding	peptide methionine sulfoxide reductase-like	PMSR
100165847	307.4860204	344.1006871	343.9218699	280.0097935	254.4705081	290.0104979	-0.264721073	0.000246422	0.001100115	LOC100165847	NC_042495.1	76655861	76657760	-	546	protein_coding	ubiquitin/ribosomal protein S30e fusion protein-like	Ribosomal_S30
100169501	223.1726419	247.2465224	236.0040814	302.320685	254.1467049	280.379714	0.251612635	0.00048209	0.002037486	LOC100169501	NC_042495.1	72105353	72107726	-	1609	protein_coding	multifunctional protein ADE2	-
100145846	297.4075091	329.4887524	319.2026117	260.9088016	251.6016969	269.3286538	-0.268062158	3.68E-06	2.24E-05	Dcxr	NC_042494.1	110867976	110876247	+	2373	protein_coding	dicarbonyl/L-xylulose reductase	-
100167084	105.9532482	104.1859019	105.6890126	198.3958462	246.3026855	232.10945	1.106205708	4.45E-47	3.35E-45	LOC100167084	NC_042495.1	65307363	65315769	-	1658	protein_coding	lipid storage droplets surface-binding protein 1%2C transcript variant X2	Perilipin
100158870	583.7741404	424.1515315	513.7725633	215.0566129	245.4070642	234.8700976	-1.123823094	1.37E-30	5.09E-29	cp30	NC_042494.1	62443472	62445434	+	1074	protein_coding	cuticular protein 30	Chitin_bind_4
100161617	135.9287506	120.9957492	121.0937849	193.9556599	243.8239054	230.0506018	0.827256658	3.37E-22	8.44E-21	LOC100161617	NC_042495.1	2870477	2875168	+	1428	protein_coding	uncharacterized LOC100161617	-
100144886	221.8413582	217.8653135	225.9923593	240.3822024	242.8260914	248.2784039	0.142769427	0.00569004	0.018343228	LOC100144886	NC_042495.1	42353320	42358406	+	1299	protein_coding	cytochrome B5-like protein	-
100165729	322.1103635	361.3160948	333.2272215	252.9272531	242.1761627	257.0163384	-0.427740914	1.46E-12	1.83E-11	LOC100165729	NC_042496.1	15009770	15012484	+	1353	protein_coding	translocon-associated protein subunit alpha	-
100571840	498.2735399	481.8548914	533.8491918	180.8702504	240.9251484	214.9855505	-1.242891871	2.97E-44	2.01E-42	LOC100571840	NC_042494.1	165122492	165134918	-	1009	protein_coding	uncharacterized LOC100571840%2C transcript variant X1	-
100164695	205.8370887	226.6046241	223.9591006	254.3110995	237.3834086	248.4509434	0.180401237	0.002647871	0.009304111	LOC100164695	NC_042494.1	63586577	63589767	-	1400	protein_coding	aldo-keto reductase-like	Aldo_ket_red
100160486	175.5778047	180.2253962	176.0643125	215.8508565	237.0311573	231.1598821	0.369798525	1.60E-11	1.81E-10	LOC100160486	NC_042495.1	111119667	111146614	-	2728	protein_coding	facilitated trehalose transporter Tret1%2C transcript variant X3	Sugar_tr
100161765	290.890553	306.3034294	300.1968568	245.5050737	236.4256091	246.0357386	-0.294899961	1.91E-08	1.56E-07	LOC100161765	NC_042493.1	47868591	47872520	-	1242	protein_coding	profilin-like%2C transcript variant X1	-
100144911	301.9371646	329.5412957	306.2146949	240.4857129	235.6281022	243.623873	-0.374662371	4.95E-12	5.89E-11	Sec61a1	NC_042494.1	141202149	141206839	-	2434	protein_coding	Sec61 alpha 1 subunit	-
100159954	209.0003696	225.0496861	214.2471092	257.2471646	235.25282	244.2569844	0.191582072	0.001121703	0.00434072	LOC100159954	NC_042494.1	78994196	78995757	-	1562	protein_coding	enoyl-CoA hydratase%2C mitochondrial	ECH
100166931	162.0032263	160.8221478	164.2600772	249.1984103	234.8207925	240.0996478	0.578946611	1.68E-27	5.46E-26	LOC100166931	NC_042496.1	36746244	36751076	-	1558	protein_coding	polyubiquitin-G%2C transcript variant X2	ubiquitin
100168217	278.846781	302.9217189	286.2684464	244.7736593	233.3449976	241.5795924	-0.263347585	2.07E-06	1.30E-05	LOC100168217	NC_042494.1	110309907	110313897	-	1461	protein_coding	uncharacterized protein LOC100168217	-
100159935	185.424266	191.6267096	190.25912	258.2421369	233.1409138	240.6721365	0.374812241	5.65E-11	6.05E-10	LOC100159935	NC_042493.1	87405611	87434536	+	2609	protein_coding	excitatory amino acid transporter 1%2C transcript variant X1	SDF
100302322	745.6365009	501.8620682	650.325971	198.3071871	232.5592826	213.8659798	-1.551613087	1.76E-18	3.52E-17	LOC100302322	NC_042494.1	62671980	62672898	-	800	protein_coding	cuticular protein	Chitin_bind_4
100166901	265.7944627	255.0538927	294.1959878	248.0132919	229.5084873	243.5251512	-0.169841408	0.01211747	0.035188169	LOC100166901	NC_042496.1	33312687	33314772	-	1322	protein_coding	urease accessory protein UreE	-
100169634	278.8181532	296.2037273	286.4942391	252.120615	227.8833235	246.930163	-0.238045168	4.55E-05	0.000234926	Cct5	NC_042494.1	53411343	53418094	+	2343	protein_coding	chaperonin containing TCP1%2C subunit 5 (epsilon)	-
100162777	167.6117923	187.7940011	179.7808258	234.5285632	227.846731	236.6238177	0.392391087	3.11E-11	3.43E-10	LOC100162777	NC_042496.1	30414673	30424519	-	1519	protein_coding	alpha-crystallin B chain%2C transcript variant X1	-
100145842	250.865084	263.1567792	253.8587184	219.1745024	227.1768609	229.9056991	-0.176450887	0.000685929	0.002787713	Lwr	NC_042496.1	16672115	16690104	-	1516	protein_coding	lesswright%2C transcript variant 2	UQ_con
100161504	159.7946634	160.3141292	158.1144113	242.1968684	226.214184	238.9814759	0.571628768	1.26E-24	3.59E-23	LOC100161504	NC_042494.1	95342587	95353156	-	1167	protein_coding	acyl-protein thioesterase 1%2C2-like%2C transcript variant X1	Abhydrolase_2
100164800	272.4356112	305.8055962	297.4639823	258.9760305	225.1576589	241.0400439	-0.264918502	0.00011012	0.000528718	LOC100164800	NC_042496.1	32813761	32819379	-	2005	protein_coding	NOP58 ribonucleoprotein homolog	-
100162105	198.6169612	191.7480965	185.9546077	231.3023735	224.7328872	223.9727585	0.245409099	2.04E-06	1.29E-05	LOC100162105	NC_042494.1	122974005	123015820	-	4853	protein_coding	pyruvate carboxylase%2C mitochondrial%2C transcript variant X1	CPSase_L_D2
100167359	167.1788234	162.4988463	167.7153031	209.2486419	224.0831548	218.5544371	0.396957998	7.49E-14	1.05E-12	LOC100167359	NC_042495.1	97919910	97935806	-	2269	protein_coding	gelsolin	-
100161673	182.3905437	161.9656204	175.4438305	276.0646572	223.9462349	245.6169864	0.527223278	1.57E-10	1.61E-09	LOC100161673	NC_042493.1	70164806	70172850	+	911	protein_coding	putative defense protein Hdd11	-
100168509	176.6686004	175.9219331	176.9517898	208.414905	223.2311102	207.4458061	0.278085722	7.81E-07	5.19E-06	LOC100168509	NC_042494.1	76830485	76843798	-	1159	protein_coding	AN1-type zinc finger protein 6-like	zf-A20
100159400	117.200784	129.9612112	135.9092938	249.877235	222.4142762	295.3245798	1.010095782	5.86E-25	1.70E-23	LOC100159400	NC_042494.1	27393873	27395305	+	542	lncRNA	uncharacterized LOC100159400	-
100168782	66.9835769	48.82380569	51.84687876	257.7419116	221.9079581	231.9873458	2.091237475	1.28E-89	2.93E-87	LOC100168782	NC_042495.1	86977906	86981953	-	990	protein_coding	protein takeout	-
100163260	269.2198455	284.9441388	286.4529539	246.6845438	221.3253447	238.4059647	-0.243879362	4.72E-05	0.000243109	LOC100163260	NC_042495.1	47940357	47944379	+	2071	protein_coding	nucleolin	-
100165583	711.8940638	586.8111302	647.0226084	111.8457966	219.7037308	159.0930701	-1.981637017	4.58E-12	5.46E-11	LOC100165583	NC_042494.1	99445631	99447638	-	1613	protein_coding	keratin%2C type I cytoskeletal 9	-
100569954	111.4163189	152.5801952	131.2347067	177.5455951	219.092583	197.9309943	0.596457818	2.68E-09	2.44E-08	LOC100569954	NC_042496.1	16638248	16643368	+	2355	protein_coding	maltase 2	-
100159098	285.8260714	324.3023719	305.7634962	242.730943	218.5829799	246.6179362	-0.364432849	8.24E-08	6.24E-07	Nop56	NC_042495.1	114597939	114605377	-	1747	protein_coding	nucleolar KKE/D repeat protein Nop56	-
100572491	175.8367497	159.2551796	186.8459376	221.0125614	218.1785022	210.9387194	0.323862139	8.73E-06	5.04E-05	LOC100572491	NC_042493.1	117070422	117071379	+	579	lncRNA	uncharacterized LOC100572491	-
100162438	72.96782604	43.99433833	57.6119332	228.7830397	216.6185607	219.0414597	1.934174413	7.08E-20	1.54E-18	LOC100162438	NC_042496.1	13897313	13905772	+	2477	protein_coding	mRNA decay activator protein ZFP36L2-A	zf-CCCH
100187582	986.490603	641.5350577	892.496917	153.2693741	216.363569	193.9215378	-2.155329359	3.04E-21	7.15E-20	cp28	NC_042494.1	62461816	62463309	+	875	protein_coding	cuticular protein 28	Chitin_bind_4
100166678	134.6210717	109.6834792	122.8839391	217.4483982	215.7360389	213.0395214	0.821911399	3.82E-29	1.35E-27	LOC100166678	NC_042494.1	140631439	140657339	+	3965	protein_coding	flocculation protein FLO11%2C transcript variant X2	-
100165458	277.1074671	311.6322476	293.4346373	230.8631122	215.0124091	221.7974438	-0.394765967	2.56E-10	2.59E-09	LOC100165458	NC_042494.1	121137024	121140208	+	1050	protein_coding	translocon-associated protein subunit gamma	-
100168452	248.3576279	270.4049101	261.314487	228.8055268	214.8190634	216.7967466	-0.233143102	3.77E-05	0.000197261	LOC100168452	NC_042495.1	83901793	83906940	-	2040	protein_coding	T-complex protein 1 subunit eta	-
100161225	169.8114557	195.4495385	184.6746752	213.9009535	214.4737227	216.1950472	0.23633917	0.000294347	0.001291411	LOC100161225	NC_042494.1	28470716	28471619	+	772	protein_coding	macrophage migration inhibitory factor-like%2C transcript variant X1	MIF
100163867	524.1620172	559.7201859	565.568357	31.78863614	212.4579535	130.8936522	-2.130736585	0.002697189	0.009458447	LOC100163867	NC_042494.1	107364902	107366697	-	1698	protein_coding	putative cyclin-dependent serine/threonine-protein kinase DDB_G0272797/DDB_G0274007	-
100169390	228.608197	250.8375803	249.5721884	228.8434486	210.863419	213.2457562	-0.151808693	0.013045292	0.037441437	LOC100169390	NC_042495.1	37017085	37031566	-	1845	protein_coding	heterogeneous nuclear ribonucleoprotein K	KH_1
100570951	187.1022917	185.6224614	207.1403255	242.3407394	209.2350884	214.2361673	0.206545939	0.005327766	0.017299066	LOC100570951	NC_042494.1	83367626	83369112	-	1120	protein_coding	uncharacterized LOC100570951	-
100162363	180.7208494	191.859456	190.0782316	209.7423521	209.0767234	213.3440226	0.175065162	0.000978736	0.003834498	Sdhb	NC_042495.1	86418426	86421099	-	1349	protein_coding	succinate dehydrogenase B	-
100574212	139.3768358	150.7402287	142.8380029	218.4454265	208.9232754	206.6862954	0.557455424	2.61E-21	6.20E-20	LOC100574212	NC_042493.1	65684853	65689165	+	1105	protein_coding	1%2C4-alpha-glucan-branching enzyme-like	-
100169331	128.6277204	145.4312338	142.7081751	222.4549575	208.8271746	221.5684006	0.654802841	3.41E-24	9.48E-23	LOC100169331	NC_042495.1	51446490	51450552	+	1326	protein_coding	protein lethal(2)essential for life	-
100168862	160.2186561	168.7945252	166.263761	197.6958353	208.3384053	209.0410384	0.319438767	1.46E-09	1.36E-08	LOC100168862	NC_042493.1	82144845	82164247	+	2279	protein_coding	integral membrane protein 2B%2C transcript variant X3	-
100162401	261.1801529	295.9448519	282.4880573	218.2481017	207.482631	231.6051282	-0.346001724	1.24E-07	9.23E-07	LOC100162401	NC_042494.1	104869615	104872243	-	1881	protein_coding	partner of Y14 and mago%2C transcript variant X2	-
100168263	242.531979	295.7479171	276.9180649	245.4511825	206.1826212	224.3489856	-0.262756612	0.001503791	0.005636804	Fib	NC_042495.1	51103697	51105392	-	1377	protein_coding	fibrillarin	-
100162779	259.1941761	255.0578278	250.9953084	236.0025109	205.5260999	227.3336614	-0.187378685	0.003156349	0.010868118	LOC100162779	NC_042494.1	52825711	52830653	-	1908	protein_coding	adenosylhomocysteinase	-
100162102	242.6004298	266.4161967	249.686305	222.2603904	205.4585529	219.6609241	-0.221874045	0.000191892	0.0008755	LOC100162102	NC_042496.1	31432782	31450289	-	1963	protein_coding	T-complex protein 1 subunit delta	-
100575172	167.9239173	192.9749779	185.7162085	243.6037628	205.3655765	227.3725955	0.314612362	7.16E-05	0.000356488	LOC100575172	NC_042495.1	115554425	115555581	-	684	protein_coding	10 kDa heat shock protein%2C mitochondrial	-
100167383	179.9361578	195.391459	187.2463686	206.4829029	205.1186643	214.6390057	0.16166636	0.003295396	0.011304951	LOC100167383	NC_042495.1	13546831	13554794	+	1877	protein_coding	juvenile hormone binding protein-like	-
100188959	168.7483271	174.5936036	160.6964232	179.7413703	203.0911543	201.2402233	0.219282066	0.000733736	0.002958382	Miple	NC_042494.1	17888936	17916918	+	1888	protein_coding	miple protein	-
100161766	348.8506832	215.0427313	316.6750354	215.2713769	201.9133266	202.8321294	-0.500102813	0.013749926	0.039199961	cp35	NC_042494.1	62335099	62335951	+	710	protein_coding	cuticular protein 35	Chitin_bind_4
100159179	224.4256206	254.1789318	237.4532291	216.2263832	201.8774565	217.656552	-0.164475622	0.00892843	0.027042397	LOC100159179	NC_042494.1	93292492	93296905	+	1868	protein_coding	T-complex protein 1 subunit zeta	-
100159613	35.05966897	41.97638341	40.99671981	172.9963332	201.631094	184.7912724	2.252301365	6.99E-172	7.88E-169	LOC100159613	NC_042495.1	13588324	13593882	-	1841	protein_coding	uncharacterized LOC100159613	-
100575796	104.1200614	98.3820388	106.2081408	232.9554612	198.7489599	242.5694383	1.133915062	1.05E-45	7.55E-44	LOC100575796	NC_042494.1	36801466	36803030	+	1025	lncRNA	uncharacterized LOC100575796%2C transcript variant X1	-
novel.553	55.81896882	50.18914479	50.76622789	205.4373762	198.3750429	210.1888064	1.975581422	9.34E-195	1.34E-191	-	NC_042495.1	87026115	87034196	+	1219	-	PF06585:Haemolymph juvenile hormone binding protein (JHBP)	-
100165963	187.9340003	170.6941787	177.8179233	214.178267	197.0815444	209.7010357	0.217658878	0.000562019	0.002338339	LOC100165963	NC_042494.1	13026198	13030221	-	1388	protein_coding	ZM-domain protein%2C transcript variant X2	-
100167758	62.84773107	64.31150968	65.73825269	223.1597517	195.0514638	221.4435484	1.736598849	1.07E-130	6.77E-128	LOC100167758	NC_042494.1	59344398	59345531	+	1022	protein_coding	cuticle protein 21	Chitin_bind_4
100165921	262.3146813	290.3912776	281.4666278	186.2313793	194.1786574	194.2689442	-0.530575051	3.66E-21	8.56E-20	LOC100165921	NC_042495.1	116255187	116277819	-	2653	protein_coding	adhesive plaque matrix protein	CBM_14
100167436	218.0362503	233.5152495	233.8700663	208.3525157	193.2082035	197.8047271	-0.186442879	0.001285196	0.004893147	LOC100167436	NC_042494.1	130344213	130351411	-	1657	protein_coding	eukaryotic translation initiation factor 4H	RRM_1
100164365	413.6590498	265.465469	367.8387527	205.7286579	193.0700653	194.3635816	-0.813639182	1.24E-05	6.98E-05	cp10	NC_042494.1	62623913	62624727	-	728	protein_coding	cuticular protein 10	Chitin_bind_4
100161103	205.2176555	228.0547418	207.5759264	130.1146143	192.5684119	154.2528566	-0.419450528	9.90E-05	0.000478317	LOC100161103	NC_042494.1	28537741	28543648	+	1074	protein_coding	60S ribosomal protein L4-like	-
100571908	426.3092569	365.6794329	416.4298735	198.04876	192.5044598	199.3307406	-1.028078679	3.99E-49	3.19E-47	ACYPI50196	NC_042494.1	19362058	19362916	+	859	protein_coding	uncharacterized LOC100571908	-
100164007	531.5877417	326.8483836	413.7930504	164.2165203	192.4709728	185.1238755	-1.225736733	1.26E-08	1.06E-07	LOC100164007	NC_042494.1	98843077	98858137	-	2562	protein_coding	uncharacterized LOC100164007	-
100571036	166.9921886	184.742261	179.3488601	198.761876	192.4400009	201.2050312	0.164855888	0.008844921	0.026815204	LOC100571036	NC_042494.1	98242954	98246850	-	705	protein_coding	V-type proton ATPase subunit e 2	-
100160853	260.4753836	265.2032981	256.2798439	188.9557662	192.0680198	203.9880604	-0.41198441	5.97E-12	7.07E-11	LOC100160853	NC_042494.1	24637898	24645115	-	621	protein_coding	ribonuclease UK114-like	Ribonuc_L-PSP
100165076	447.7340981	316.2546055	406.9041888	258.6437099	192.006029	225.904151	-0.784915692	4.33E-05	0.000224358	cp12	NC_042494.1	62632601	62633439	+	715	protein_coding	cuticular protein 12	Chitin_bind_4
100158833	232.5054185	254.7630497	244.5074189	214.0831973	192.0016728	204.2140029	-0.254779249	3.90E-05	0.000203529	LOC100158833	NC_042494.1	128993407	128996114	+	2032	protein_coding	T-complex protein 1 subunit alpha	-
100169332	54.20004131	34.1745577	42.48250277	230.1054749	191.9583435	213.3972325	2.285802377	9.57E-28	3.14E-26	LOC100169332	NC_042495.1	107120299	107124769	-	2088	protein_coding	cysteine sulfinic acid decarboxylase	-
100145840	163.8316578	171.3072108	178.8528554	187.2229559	191.5870802	186.6908921	0.14501501	0.014612961	0.041228304	Vha14	NC_042494.1	24883550	24884813	+	864	protein_coding	vacuolar H[+] ATPase 14kD subunit	-
100302493	147.1218719	146.3599184	154.6099912	197.8432787	191.2680943	211.6900979	0.429990839	2.03E-12	2.51E-11	NV4	NC_042494.1	96411436	96412811	+	1376	lncRNA	uncharacterized LOC100302493	-
100162420	169.6305845	172.3709925	166.196018	184.6127569	191.0106673	187.3407368	0.154399696	0.003044843	0.010525524	LOC100162420	NC_042496.1	1849197	1859135	-	1427	protein_coding	calponin-like	CH
100168717	219.7385151	252.1692373	241.2130597	205.1074586	190.8852169	210.9076664	-0.225507538	0.000863228	0.003425337	LOC100168717	NC_042496.1	2161101	2164314	-	1310	protein_coding	eukaryotic translation initiation factor 2 subunit 1%2C transcript variant X1	S1
100162042	126.0180843	103.320286	113.4908962	146.8944003	189.2108047	183.1698775	0.605096734	5.13E-10	5.02E-09	Obp1	NC_042496.1	32470573	32476720	-	1263	protein_coding	odorant-binding protein 1%2C transcript variant 2	-
100160512	45.42767892	23.46524698	34.12524215	198.2414053	188.7081723	195.3151827	2.50435909	1.82E-20	4.12E-19	LOC100160512	NC_042496.1	4885484	4907906	-	2833	protein_coding	protein spinster homolog 1%2C transcript variant X2	MFS_1
100167805	218.7160361	228.218244	221.9785079	205.2835278	188.6527398	197.801434	-0.169893623	0.002135903	0.007693639	LOC100167805	NC_042495.1	89356777	89361782	+	2037	protein_coding	RNA-binding protein squid-like%2C transcript variant X2	RRM_1
100166530	156.8753215	171.0124656	172.7730718	194.1834704	184.4697245	192.8629591	0.198245407	0.001559103	0.005823466	LOC100166530	NC_042494.1	72735571	72743339	+	875	protein_coding	troponin C-like	efhand
100162437	221.5090846	236.4746997	230.9918673	201.8934693	184.0146183	198.5885256	-0.230226495	9.59E-05	0.000464609	LOC100162437	NC_042495.1	6884074	6892056	-	1680	protein_coding	eukaryotic translation initiation factor 2 subunit 3	GTP_EFTU
100166071	140.1207326	137.8803324	135.3134708	141.4194034	183.8918118	169.4686096	0.266079451	0.00143175	0.005398832	Ctsl	NC_042496.1	40305719	40313707	+	2205	protein_coding	cathepsin L%2C transcript variant 2	Peptidase_C1
100165010	208.4883568	244.0200818	252.0116518	200.8450388	183.7359098	199.5434543	-0.262872566	0.000897043	0.003547921	LOC100165010	NC_042495.1	102693394	102694300	-	645	protein_coding	translation machinery-associated protein 7 homolog%2C transcript variant X1	-
100163830	131.8865007	145.3628737	137.4492774	210.1009283	182.4704281	196.0554724	0.512437397	3.61E-14	5.23E-13	LOC100163830	NC_042493.1	65674232	65678163	-	1971	protein_coding	1%2C4-alpha-glucan-branching enzyme	-
100570716	103.4403701	119.718664	101.787386	165.5945471	181.293664	158.2237326	0.643384532	2.32E-16	4.01E-15	ACYPI45001	NW_021771278.1	10388	11562	-	1175	protein_coding	uncharacterized LOC100570716	-
100159279	169.1379277	171.5573328	168.3176788	203.2626848	180.4151417	191.5046025	0.18325066	0.001682264	0.006231764	LOC100159279	NC_042495.1	35016664	35055444	-	4620	protein_coding	alpha-actinin%2C sarcomeric%2C transcript variant X2	CH
100166063	120.2197017	132.1622904	142.1988587	200.2983657	180.3331721	204.2077137	0.575408515	1.97E-12	2.44E-11	LOC100166063	NC_042495.1	65391338	65391985	-	497	protein_coding	uncharacterized protein LOC100166063	-
100164756	167.202273	164.0720101	160.2394844	185.6224914	180.0798457	181.4017179	0.161343363	0.001082243	0.004203482	LOC100164756	NC_042494.1	142062754	142078311	-	4480	protein_coding	very long-chain-fatty-acid--CoA ligase bubblegum%2C transcript variant X1	AMP-binding
100301491	93.5781234	113.6371044	103.326562	190.3814592	180.0499864	199.182973	0.882552067	1.96E-30	7.28E-29	Obp3	NC_042496.1	31844416	31863225	+	1072	protein_coding	odorant-binding protein 3	-
100168603	215.6207252	222.7749662	234.7864223	193.2269545	180.0383538	189.0752682	-0.252519839	1.21E-05	6.85E-05	LOC100168603	NC_042496.1	41149385	41163001	-	2180	protein_coding	RNA-binding protein cabeza%2C transcript variant X2	RRM_1
100160153	152.6288777	158.9233716	148.4385813	190.9924654	178.395663	185.3847449	0.277175876	5.31E-07	3.60E-06	LOC100160153	NC_042493.1	125507309	125515324	+	2842	protein_coding	glycerol-3-phosphate dehydrogenase%2C mitochondrial%2C transcript variant X2	DAO
100302325	215.3543569	247.6985428	233.9533118	183.4556023	177.8706842	188.4441265	-0.335170449	2.68E-07	1.89E-06	Tapdelta	NC_042494.1	63472482	63473628	-	1072	protein_coding	translocon-associated protein delta	-
100162920	236.8982529	236.6467684	223.0224524	180.3982517	176.5396543	178.7430521	-0.37214386	9.35E-13	1.19E-11	LOC100162920	NC_042496.1	17198750	17209069	+	2555	protein_coding	failed axon connections%2C transcript variant X2	-
100164266	119.0659091	124.2156043	123.565728	164.2714052	175.9918302	173.3145302	0.492290605	1.13E-20	2.59E-19	LOC100164266	NC_042494.1	43365331	43382193	+	3483	protein_coding	glycogenin-1%2C transcript variant X1	Glyco_transf_8
100163460	196.8228998	218.7399341	207.9784109	180.9115827	175.4252604	186.0667058	-0.194053488	0.001075219	0.00417723	LOC100163460	NC_042496.1	18626394	18630501	-	1547	protein_coding	eukaryotic translation initiation factor 2 subunit 2	-
100159520	221.2683385	230.4964369	232.4829282	172.6407954	174.6075524	176.636055	-0.378293358	5.89E-13	7.70E-12	LOC100159520	NC_042494.1	447423	452112	-	1283	protein_coding	high mobility group protein A-like	-
100144787	186.708189	199.7589734	199.0669243	150.5823376	174.5950729	172.3183794	-0.228181785	0.000987384	0.00386358	Catb-84	NC_042493.1	85745967	85748542	-	1223	protein_coding	cathepsin B-84	Peptidase_C1
100159425	196.4427745	215.2837006	209.8167369	182.7658966	174.3279488	178.1985988	-0.208379462	0.000379459	0.001631707	LOC100159425	NC_042494.1	1714858	1717265	+	1172	protein_coding	eukaryotic translation initiation factor 3 subunit 2 beta-like	-
100163970	105.0894441	85.62145646	92.74416503	181.89352	174.3251773	182.2641835	0.932098959	3.89E-35	1.77E-33	LOC100163970	NC_042496.1	36265220	36299417	-	2903	protein_coding	elongation of very long chain fatty acids protein AAEL008004%2C transcript variant X1	ELO
100166606	114.5837088	132.3984399	121.3804815	234.8408052	173.7928146	210.0199287	0.75535716	7.17E-15	1.10E-13	LOC100166606	NC_042494.1	59076980	59079238	+	1082	protein_coding	annexin A7-like	-
100164587	115.7794288	113.3620266	109.982226	170.976849	172.5413949	170.6297231	0.606995858	9.93E-32	3.92E-30	LOC100164587	NC_042494.1	71181674	71194687	+	2289	protein_coding	4-aminobutyrate aminotransferase%2C mitochondrial	Aminotran_3
100164444	406.4267766	291.8748609	346.2771447	173.5630526	172.4731927	170.9784719	-1.008463502	1.46E-26	4.56E-25	LOC100164444	NC_042494.1	60613027	60647100	-	2929	protein_coding	peroxidase	An_peroxidase
103309572	189.8726754	214.2442197	203.2453679	170.1792056	170.9005755	167.9983224	-0.247526328	3.26E-05	0.000172578	LOC103309572	NC_042494.1	148369413	148374243	+	1538	protein_coding	translocon-associated protein subunit beta	-
100166574	57.73145873	64.36461106	59.53565919	243.8457427	170.5140016	209.6081757	1.78776948	1.86E-69	2.65E-67	LOC100166574	NC_042494.1	42084351	42087845	+	3495	protein_coding	uncharacterized LOC100166574	-
100161283	190.6968154	194.2154109	188.9581258	176.3133088	170.5085786	166.1172015	-0.155047446	0.002206578	0.007917486	14-3-3epsilon	NC_042496.1	33047669	33058242	-	3597	protein_coding	14-3-3 protein epsilon	-
100161792	86.03715505	64.18293848	71.09428019	196.4402871	169.7307538	178.3258338	1.305075676	1.53E-42	9.73E-41	LOC100161792	NC_042495.1	111241433	111266070	+	3629	protein_coding	elongation of very long chain fatty acids protein AAEL008004%2C transcript variant X4	ELO
100160559	117.9558383	124.291559	122.5828329	143.6016418	168.2639403	156.4326257	0.36704206	2.75E-08	2.21E-07	LOC100160559	NC_042494.1	46667719	46674574	-	2638	protein_coding	6-phosphofructo-2-kinase/fructose-2%2C6-bisphosphatase	-
100169040	189.1675287	213.8328345	199.7316775	173.061482	167.8504966	177.3493742	-0.210742769	0.000682983	0.002778602	LOC100169040	NC_042495.1	71587470	71590189	+	1343	protein_coding	heterochromatin protein 1-like	Chromo
100166008	121.5312702	121.350355	131.9553252	188.0999257	165.9477089	185.6949584	0.53322237	4.42E-13	5.84E-12	LOC100166008	NC_042494.1	43235956	43237640	-	676	protein_coding	vitelline membrane protein Vm26Ab-like	-
100161161	140.4154708	140.9835061	142.8450779	172.830953	165.6398721	172.9948687	0.276618326	6.98E-08	5.33E-07	LOC100161161	NC_042495.1	44898185	44903247	-	2260	protein_coding	glucose-6-phosphate isomerase	-
100571403	185.4437514	204.9443318	202.556441	160.4272241	165.4664953	164.9384533	-0.265417378	3.57E-05	0.000187754	LOC100571403	NW_021763156.1	3773	4508	-	641	lncRNA	uncharacterized LOC100571403	-
100166954	84.59564318	70.33889481	78.23104178	160.9601803	163.7128037	158.1290209	1.05644944	1.76E-49	1.43E-47	LOC100166954	NC_042495.1	115267985	115274699	-	2709	protein_coding	N-acetyl-D-glucosamine kinase	BcrAD_BadFG
100162842	177.0361583	184.9901245	177.526816	162.7778322	161.51606	164.975915	-0.134251521	0.0063807	0.020222639	Rtnl1	NC_042495.1	50782573	50804443	+	3073	protein_coding	reticulon 1%2C transcript variant 1	-
100167750	123.1693381	131.1884377	133.7961379	163.2061643	159.6173988	159.3210045	0.320081986	3.87E-08	3.05E-07	LOC100167750	NW_021771488.1	246592	273119	-	1222	protein_coding	muscular protein 20-like	CH
100164783	321.5462127	227.2282813	276.0371897	148.8470944	159.4245201	158.0840079	-0.816570153	1.73E-16	3.02E-15	LOC100164783	NC_042496.1	10631971	10644775	-	1933	protein_coding	pollen-specific leucine-rich repeat extensin-like protein 1%2C transcript variant X1	-
100163589	193.772859	220.076601	205.0178578	158.3511415	159.4131572	169.4427714	-0.33804527	1.14E-07	8.50E-07	LOC100163589	NC_042494.1	100202896	100209239	-	1433	protein_coding	probable phosphoserine aminotransferase	Aminotran_5
100162791	74.85797052	74.20749993	72.4963585	149.0215963	159.3228146	151.896868	1.061318625	6.97E-83	1.31E-80	LOC100162791	NC_042494.1	36328464	36337494	-	2384	protein_coding	uncharacterized LOC100162791%2C transcript variant X2	SCP
100166867	187.8541071	208.6481521	198.3798815	170.3149893	159.0050672	172.3175116	-0.238877535	9.48E-05	0.000459548	LOC100166867	NC_042494.1	14330269	14333295	+	1995	protein_coding	T-complex protein 1 subunit gamma	-
100162995	187.3442765	196.5091506	187.1946148	156.8229857	158.8081207	161.6927574	-0.251789757	9.19E-07	6.04E-06	LOC100162995	NC_042494.1	131692627	131698583	+	2128	protein_coding	bleomycin hydrolase	-
100163538	180.6424874	207.7624858	200.4032874	178.4939511	157.8491706	170.1505998	-0.209954766	0.003427245	0.011696225	LOC100163538	NC_042495.1	77316205	77319546	+	1152	protein_coding	complement component 1 Q subcomponent-binding protein%2C mitochondrial-like	-
100165746	139.7204603	145.7440748	141.7635427	153.215543	157.3334698	151.9057135	0.121212531	0.014705469	0.041444834	LOC100165746	NC_042496.1	2389713	2399436	-	3196	protein_coding	aminopeptidase N	-
100164311	211.2705123	212.4964235	207.8242948	182.0071646	156.8214949	172.34954	-0.298293844	7.74E-06	4.49E-05	LOC100164311	NC_042495.1	89754944	89758095	+	1081	protein_coding	Histone H2AV (H2A.F/Z)-like	Histone
100167188	167.9592434	198.398459	194.9344883	153.3826529	156.6146555	169.5042281	-0.219937002	0.003725329	0.012582084	LOC100167188	NC_042496.1	11336617	11339272	+	898	protein_coding	mesencephalic astrocyte-derived neurotrophic factor homolog	-
100573120	136.3469363	142.3335761	144.2790744	151.833872	156.3287669	151.7503105	0.12788615	0.016998904	0.046977002	LOC100573120	NC_042494.1	46838698	46840948	-	1705	protein_coding	vicilin-like seed storage protein At2g18540	-
100159423	573.1801325	461.738171	516.3047767	82.68075011	156.2326594	119.8641607	-2.106332178	7.77E-15	1.19E-13	LOC100159423	NC_042494.1	129173870	129175419	+	963	protein_coding	uncharacterized LOC100159423	-
100169384	172.0549978	177.287331	177.1435956	149.9192854	156.0889669	153.4312021	-0.189638207	0.000111424	0.000533677	LOC100169384	NC_042494.1	70033941	70058848	-	3151	protein_coding	moesin/ezrin/radixin homolog 1%2C transcript variant X2	Band_41
100168943	126.052904	127.6615666	131.436554	161.6691632	155.8927903	159.8302083	0.316726724	1.44E-09	1.34E-08	Scsalpha	NC_042494.1	14312975	14316500	+	2046	protein_coding	succinyl coenzyme A synthetase alpha subunit	CoA_binding
100167444	124.4408826	123.6768862	137.8918316	157.766453	155.8661144	158.6471738	0.298203424	3.10E-06	1.91E-05	LOC100167444	NC_042494.1	148623788	148625632	+	1074	protein_coding	probable NADH dehydrogenase [ubiquinone] iron-sulfur protein 7%2C mitochondrial-like	-
novel.343	0.463545741	0.196719552	0.320540787	169.5715947	155.079594	185.0640255	9.015315154	1.42E-83	2.87E-81	-	NC_042494.1	166834275	166835279	+	424	-	-	-
100160435	179.6150379	199.3546661	185.7364182	176.7742542	154.5299206	168.7828628	-0.168202787	0.014006306	0.039782108	LOC100160435	NC_042494.1	30510142	30514161	-	1442	protein_coding	eukaryotic translation initiation factor 3%2C subunit M-like%2C transcript variant X1	-
100162322	181.468522	194.8944914	182.1613771	167.1995632	154.3010069	162.0731878	-0.200887679	0.00044901	0.001906086	LOC100162322	NC_042495.1	55988564	55995129	+	3103	protein_coding	eukaryotic translation initiation factor 3 subunit C%2C transcript variant X1	-
100167365	449.1171383	388.9847458	413.8998513	97.44023318	154.1203112	114.8265212	-1.76659446	1.15E-17	2.17E-16	LOC100167365	NC_042493.1	47600861	47611502	-	1079	protein_coding	CG31997-like	-
100168549	449.2127003	355.8914959	397.9925979	88.76735957	153.2874668	120.7697025	-1.723464888	1.16E-12	1.47E-11	LOC100168549	NC_042496.1	38177422	38180019	-	1531	protein_coding	keratin%2C type I cytoskeletal 9	-
100160648	246.0651046	245.0185569	234.4066308	114.160022	153.1215107	128.4716885	-0.867779111	6.39E-23	1.67E-21	LOC100160648	NC_042493.1	78703087	78716770	-	2394	protein_coding	uncharacterized LOC100160648	CBM_14
100168379	105.951989	102.7384807	104.083975	167.6837557	152.5557899	146.9016415	0.585597988	3.09E-21	7.26E-20	LOC100168379	NC_042495.1	80513026	80556089	-	6326	protein_coding	collagen alpha-1(III) chain%2C transcript variant X17	-
100159934	131.5396491	116.5595398	122.6802103	147.8578267	152.4271441	157.4903574	0.310464913	1.64E-06	1.05E-05	LOC100159934	NC_042494.1	22954308	22964182	-	1565	protein_coding	molybdenum cofactor sulfurase-like%2C transcript variant X1	MOSC_N
100160046	109.0034083	125.7215729	115.0974167	182.8699181	150.9944279	164.8931433	0.518991517	4.59E-11	4.98E-10	LOC100160046	NC_042494.1	68151786	68163437	+	2401	protein_coding	b(0%2C+)-type amino acid transporter 1%2C transcript variant X1	-
100165309	177.8492261	195.2065369	182.9487048	156.8699783	149.6482633	152.0367599	-0.270955521	1.07E-06	6.96E-06	LOC100165309	NC_042495.1	118305906	118317690	+	3705	protein_coding	eukaryotic translation initiation factor 3 subunit A	-
100163394	194.1966072	213.1352827	199.555552	161.0277056	149.586491	158.2837823	-0.365108593	4.88E-10	4.81E-09	LOC100163394	NC_042494.1	160700338	160704968	+	2613	protein_coding	eukaryotic translation initiation factor 3 subunit B	RRM_1
100168202	160.8112844	181.2303871	167.3756916	155.5136408	149.3666028	153.7071961	-0.144558313	0.015630979	0.043717419	LOC100168202	NC_042494.1	122093201	122096093	+	2341	protein_coding	protein disulfide-isomerase A6 homolog	-
100161786	38.84825503	43.96379559	43.91017693	167.7423188	149.321042	138.909395	1.855365681	2.13E-94	5.41E-92	LOC100161786	NC_042495.1	5707043	5709008	-	683	protein_coding	uncharacterized LOC100161786	-
100160468	120.3303757	129.5175194	127.5178949	167.8470787	149.2195193	167.7253725	0.368496393	2.31E-08	1.88E-07	LOC100160468	NC_042495.1	78074640	78082997	-	1733	protein_coding	trans-2%2C3-enoyl-CoA reductase-like%2C transcript variant X1	-
100160116	128.373063	133.7146432	134.4002608	144.4296504	149.1948525	148.0459711	0.162700445	0.002746077	0.009600012	LOC100160116	NC_042495.1	51050464	51052840	+	1411	protein_coding	NADH:ubiquinone oxidoreductase NDUFB5/SGDH subunit-like%2C transcript variant X2	-
100161162	106.1396525	99.70817638	95.05048715	134.2878624	148.5672199	139.9643724	0.497033611	2.71E-13	3.64E-12	LOC100161162	NC_042494.1	104082997	104111217	-	1264	protein_coding	carbonic anhydrase 2	-
100163154	79.87182951	71.55717018	72.26907191	124.7987064	148.5054888	130.5070863	0.858547526	1.27E-30	4.74E-29	LOC100163154	NC_042494.1	67011462	67037843	+	6925	protein_coding	fatty acid synthase%2C transcript variant X1	Acyl_transf_1
100573843	99.29610498	120.3618444	114.2736325	136.1291059	148.2818838	150.7138071	0.389293384	1.24E-06	8.02E-06	ACYPI37407	NC_042494.1	109311433	109312257	+	825	protein_coding	uncharacterized LOC100573843	-
100161513	169.4890398	162.8595581	168.6281979	137.1930764	148.2230418	135.8929414	-0.243142092	1.75E-05	9.68E-05	LOC100161513	NC_042494.1	106597721	106611113	+	3150	protein_coding	activating transcription factor of chaperone%2C transcript variant X1	bZIP_1
100575145	171.5014179	171.0333407	191.4107921	131.7335521	147.6597849	152.315913	-0.299657238	0.000104505	0.000503598	LOC100575145	NC_042494.1	115241581	115245039	-	653	lncRNA	uncharacterized LOC100575145	-
100159526	294.5211158	255.5740064	262.9128505	144.2379967	147.4427485	154.1875684	-0.860352187	1.58E-34	7.02E-33	cp62	NC_042494.1	59451839	59452896	+	936	protein_coding	cuticular protein 62	Chitin_bind_4
100165186	131.879117	134.536952	134.9409833	143.155039	147.3710397	147.4400816	0.132824294	0.01333814	0.038174892	Obp2	NC_042495.1	49428259	49432721	-	1310	protein_coding	odorant-binding protein 2	-
100164886	168.9237701	178.522495	168.0850503	153.5156216	147.312399	156.4317279	-0.16616697	0.002687038	0.00942704	LOC100164886	NC_042496.1	18975267	18978542	-	1974	protein_coding	T-complex protein 1 subunit theta	-
100164936	162.1071477	175.2184673	168.9760023	150.951919	147.1560959	149.4629207	-0.170850383	0.001345236	0.005100647	LOC100164936	NC_042496.1	750600	764454	-	2388	protein_coding	heterogeneous nuclear ribonucleoprotein 27C%2C transcript variant X2	RRM_1
100159805	117.198846	119.6987591	116.4936804	137.3497802	144.8190946	142.4010185	0.271520702	1.07E-07	8.03E-07	LOC100159805	NC_042494.1	133345040	133364561	-	2919	protein_coding	uncharacterized LOC100159805%2C transcript variant X1	-
100166826	109.7286798	102.5962547	104.3390453	138.3094166	144.6108427	141.7236186	0.429871346	3.50E-15	5.50E-14	LOC100166826	NC_042494.1	138018492	138039383	+	3256	protein_coding	ATP-binding cassette sub-family G member 4%2C transcript variant X2	ABC2_membrane
100161938	169.6291905	187.7786822	178.8022356	161.6906498	143.2298563	160.6144419	-0.196804164	0.003122518	0.010770435	LOC100161938	NC_042494.1	70019303	70021738	-	2312	protein_coding	ATP-dependent RNA helicase WM6	DEAD
100161196	170.899964	184.4486421	184.6635934	141.3317618	143.1077954	146.4253633	-0.31862456	1.04E-07	7.79E-07	LOC100161196	NC_042494.1	78266360	78268920	-	932	protein_coding	stress-associated endoplasmic reticulum protein 2	-
100169201	184.8075065	182.9491832	187.4220839	141.6007172	142.9164886	144.0712699	-0.366543351	3.46E-13	4.61E-12	LOC100169201	NC_042495.1	93069073	93071029	-	1802	protein_coding	probable hydroxyacid-oxoacid transhydrogenase%2C mitochondrial	-
100162036	103.4899397	107.4770547	104.7949245	147.6139159	142.8941908	149.8531201	0.486720477	4.72E-14	6.78E-13	LOC100162036	NC_042494.1	160065770	160066785	-	629	protein_coding	CG32214-like	-
100167645	123.3690382	119.3930202	120.4227307	145.5310091	142.8139492	146.0832511	0.265110889	2.51E-07	1.77E-06	LOC100167645	NC_042493.1	79808838	79819454	-	2311	protein_coding	plectin	-
100167308	169.4077254	200.3611903	206.0560261	157.0059505	142.4107317	163.2449783	-0.308096307	0.000431639	0.001841525	LOC100167308	NC_042495.1	112108593	112109436	+	465	protein_coding	probable small nuclear ribonucleoprotein G	-
100160121	136.5331631	134.4025046	135.6917395	163.3897207	142.291205	150.2457166	0.171996687	0.00566682	0.018272108	LOC100160121	NC_042495.1	69156181	69165191	+	4373	protein_coding	sarcalumenin%2C transcript variant X1	-
100167494	58.25060077	28.899738	41.79347629	179.9282296	141.8301201	162.1348342	1.913560828	3.30E-10	3.31E-09	LOC100167494	NC_042494.1	83519783	83535726	+	1407	protein_coding	uncharacterized LOC100167494	-
100164739	126.9021522	119.8872885	117.0195406	140.9424324	141.3379572	133.8783451	0.200626596	0.000317945	0.001388996	LOC100164739	NC_042493.1	29577485	29608065	+	7852	protein_coding	acetyl-CoA carboxylase	Carboxyl_trans
100168734	228.4092306	268.3217252	248.498915	113.3526698	140.403086	136.8547879	-0.924987817	5.97E-27	1.88E-25	LOC100168734	NC_042493.1	22142477	22161437	-	1051	protein_coding	C-type lectin-like	Lectin_C
100162795	94.47467065	93.50338028	96.37387379	175.4161529	139.3458241	153.1517618	0.725606845	5.26E-19	1.08E-17	LOC100162795	NC_042495.1	107216492	107298036	-	1351	protein_coding	superoxide dismutase [Cu-Zn]-like	-
100165054	109.3499982	113.5823166	108.0617362	130.5456688	139.1507074	142.6874648	0.323906435	3.47E-08	2.75E-07	LOC100165054	NC_042495.1	116398540	116400322	+	1783	protein_coding	lipoamide acyltransferase component of branched-chain alpha-keto acid dehydrogenase complex%2C mitochondrial	Biotin_lipoyl
100571146	6.748271038	1.252926244	3.840069461	131.4884419	137.4564047	137.8594322	5.105867032	5.42E-16	9.12E-15	LOC100571146	NC_042496.1	6364378	6365424	+	932	lncRNA	uncharacterized LOC100571146	-
100160386	171.8777626	187.7718112	175.4469069	151.8043891	137.2277003	147.6420261	-0.286194796	3.89E-06	2.35E-05	LOC100160386	NC_042494.1	133509359	133512235	-	2263	protein_coding	eukaryotic translation initiation factor 3 subunit L	-
100163126	637.9955044	414.8319396	532.7622459	103.7145233	137.2162662	132.269133	-2.081237902	3.75E-22	9.34E-21	LOC100163126	NC_042495.1	47248303	47250909	-	829	protein_coding	uncharacterized protein DDB_G0272718	-
100165497	152.9357576	160.3774361	155.949029	129.6191181	137.0767662	136.8995264	-0.210621264	6.08E-05	0.000306743	Paip2	NC_042494.1	62937360	62943885	+	2862	protein_coding	polyA-binding protein interacting protein 2%2C transcript variant 1	-
100144798	160.1855007	172.1849847	166.2733005	146.884256	136.8816373	144.1473912	-0.213642096	0.000375026	0.0016144	Eif3k	NC_042494.1	69092551	69094433	+	1119	protein_coding	eukaryotic translation initiation factor 3%2C subunit K	-
100160919	30.54730803	23.75485184	27.15864625	127.4623631	135.1923301	131.8703409	2.281547275	4.98E-152	3.93E-149	LOC100160919	NC_042496.1	15003377	15006411	+	1171	protein_coding	uncharacterized protein LOC100160919	-
100164236	159.9689232	181.8498994	180.5576045	152.0997555	134.9888103	153.8780102	-0.237154668	0.001460332	0.005493479	LOC100164236	NC_042494.1	69189322	69190813	+	1107	protein_coding	NHP2-like protein 1	-
100160691	105.7249971	108.5808603	105.777187	122.2481167	134.3170784	125.7543867	0.263140687	1.03E-05	5.89E-05	LOC100160691	NC_042496.1	7188093	7195679	+	1511	protein_coding	lysosomal-associated transmembrane protein 4A	-
100162609	80.72913392	88.08660256	87.1476182	157.1256485	133.9553638	148.3273968	0.786938447	9.27E-26	2.78E-24	LOC100162609	NC_042496.1	10593551	10596985	-	1061	protein_coding	eukaryotic peptide chain release factor GTP-binding subunit	-
100160658	120.5569322	118.5225342	112.2130728	141.3522071	133.8561783	138.5737877	0.242796482	2.90E-05	0.000154759	LOC100160658	NC_042495.1	12854072	12860611	-	1778	protein_coding	glycerol-3-phosphate dehydrogenase [NAD(+)]%2C cytoplasmic%2C transcript variant X2	NAD_Gly3P_dh_N
100159650	144.7589858	165.3747973	172.3052289	139.917482	133.341433	142.0662516	-0.20875651	0.003804567	0.012817563	LOC100159650	NC_042496.1	7904360	7908451	-	1358	protein_coding	proteasome 25 kDa subunit	Proteasome
100164451	93.38801225	93.17962739	91.66296187	135.06285	133.3101225	147.3081342	0.585866994	2.26E-22	5.70E-21	LOC100164451	NC_042496.1	40199148	40217888	-	1972	protein_coding	acetyl-CoA acetyltransferase%2C cytosolic	Thiolase_N
100160889	100.8403447	105.7571527	103.8869927	145.283651	133.2732303	143.5189553	0.449972554	3.37E-15	5.30E-14	LOC100160889	NC_042495.1	7996380	8031745	+	3053	protein_coding	uncharacterized LOC100160889%2C transcript variant X5	-
100575643	116.5061411	120.911466	115.5831891	155.8334467	133.0825209	139.3661133	0.285837676	0.000262353	0.001164054	LOC100575643	NC_042494.1	114965640	114973879	-	526	protein_coding	uncharacterized LOC100575643	-
100168453	452.0071191	315.8701978	388.4568461	99.6375326	132.9913689	114.7505232	-1.729053979	1.74E-19	3.69E-18	LOC100168453	NC_042494.1	5132475	5136453	-	3223	protein_coding	extensin-2	Chitin_bind_4
100160702	118.2699873	117.4373921	114.4044795	134.7160779	132.0225242	129.0142801	0.183556292	0.000339708	0.001474958	LOC100160702	NC_042495.1	109822611	109889146	+	3200	protein_coding	solute carrier family 2%2C facilitated glucose transporter member 1%2C transcript variant X1	Sugar_tr
100164683	156.473902	167.6638021	161.1287143	150.503909	131.8144233	142.6073007	-0.184501745	0.005980783	0.019131957	LOC100164683	NC_042494.1	90691076	90693343	+	1085	protein_coding	proteasome subunit alpha type-1	Proteasome
100164447	164.184623	178.7337642	180.058989	149.1928837	131.635346	141.9922879	-0.299407318	2.78E-05	0.00014861	LOC100164447	NC_042495.1	84611451	84614727	-	707	protein_coding	RNA polymerase II transcriptional coactivator	-
100144773	158.9931649	157.6455121	156.3583157	138.4808351	131.4675923	128.1020549	-0.242023038	6.78E-06	3.97E-05	LOC100144773	NC_042494.1	117526279	117534634	+	3219	protein_coding	membrane alanyl aminopeptidase N	-
100164287	312.2754576	326.2168304	332.7143798	62.31753179	130.88714	103.7037863	-1.703428635	4.30E-09	3.80E-08	LOC100164287	NC_042496.1	15662213	15664282	+	860	protein_coding	CG17127-like	-
100166832	140.9550708	151.9127236	141.4511614	130.2100299	130.7320868	131.0221928	-0.1411012	0.008526395	0.025969292	LOC100166832	NC_042494.1	6736222	6743756	-	2714	protein_coding	eukaryotic peptide chain release factor GTP-binding subunit ERF3A	GTP_EFTU
100168043	115.5508896	132.2323866	115.5844901	152.3087269	129.4188285	140.4509012	0.223507219	0.007117443	0.022253646	LOC100168043	NC_042494.1	43244362	43245465	-	662	protein_coding	uncharacterized LOC100168043	-
100159774	150.8121171	177.9225671	175.1125798	140.0803861	128.3936603	141.9312225	-0.288475419	0.00026851	0.001188633	LOC100159774	NC_042494.1	134378624	134381525	+	661	protein_coding	H/ACA ribonucleoprotein complex subunit 2-like	-
100169636	144.433461	156.6086451	151.0696792	137.4484942	128.1690892	139.5043484	-0.151290314	0.012238686	0.03546241	LOC100169636	NC_042495.1	74032847	74037874	+	1781	protein_coding	26S proteasome regulatory subunit 7	AAA
100169540	60.17865027	62.1956945	60.34435412	132.400475	127.9762016	142.7763053	1.148501063	4.88E-76	8.28E-74	LOC100169540	NW_021769040.1	1757	6170	-	2021	protein_coding	aminopeptidase N	-
100161311	51.39721425	28.04986087	39.44715773	135.070042	127.3995759	134.2332436	1.744003544	2.66E-12	3.24E-11	AANAT1	NC_042494.1	141325868	141345186	-	1408	protein_coding	arylalkylamine N-acetyltransferase-like%2C transcript variant X1	Acetyltransf_1
100167948	399.6038887	366.7594978	375.2200884	21.67036492	127.2627324	77.86727397	-2.326040051	0.000513953	0.00215885	LOC100167948	NC_042494.1	107326545	107329616	+	1526	protein_coding	skin secretory protein xP2	-
100168968	79.22366112	85.89635332	79.47258107	133.4934732	126.8400947	129.1928643	0.678304858	2.58E-30	9.51E-29	LOC100168968	NC_042494.1	167170438	167176126	-	1945	protein_coding	cytosolic non-specific dipeptidase	Peptidase_M20
100161742	42.08164565	43.05626522	44.2234245	132.6460636	126.7413722	137.073665	1.622996509	9.69E-129	5.46E-126	LOC100161742	NC_042494.1	63389963	63397250	+	1049	protein_coding	feruloyl esterase B-like	-
100574951	373.7538403	243.8273272	341.3973079	137.5089774	126.4145803	122.5576713	-1.304945862	2.15E-12	2.65E-11	LOC100574951	NC_042494.1	62352152	62353092	-	795	protein_coding	cuticle protein 7	Chitin_bind_4
100165857	144.6619393	163.5391203	150.9872715	141.2984207	125.9706247	131.042886	-0.197996431	0.004291055	0.014240636	LOC100165857	NC_042495.1	74089090	74093187	-	1310	protein_coding	protein arginine n-methyltransferase 1%2C putative	-
100575815	102.9659254	115.5253132	113.9150443	130.723418	125.8653162	138.2788129	0.255708464	0.000281823	0.001241644	LOC100575815	NC_042495.1	68910571	68911466	-	896	protein_coding	uncharacterized LOC100575815	-
100160354	139.1613768	150.3976775	141.4714862	126.9250397	125.7752793	128.624932	-0.169822781	0.003572171	0.012125247	LOC100160354	NC_042495.1	116526315	116529613	-	1181	protein_coding	peptidyl-prolyl cis-trans isomerase-like	Pro_isomerase
100160637	110.7305494	113.8039278	110.6854503	122.2232278	125.4499032	127.3882853	0.168790142	0.002923292	0.010154289	LOC100160637	NC_042494.1	11567766	11574041	+	1180	protein_coding	ADIPOR-like receptor CG5315-like	-
100167524	103.068931	106.6542462	105.7484882	124.1616794	125.2246755	130.0727785	0.27333581	2.77E-06	1.72E-05	LOC100167524	NC_042496.1	22956169	22957796	+	1098	protein_coding	ubiquitin-conjugating enzyme rad6-like	UQ_con
100169093	201.4401102	207.5409603	202.3197694	134.5590161	124.929896	131.9762282	-0.636095816	2.33E-31	9.03E-30	LOC100169093	NC_042495.1	105211579	105216391	+	2039	protein_coding	aldehyde dehydrogenase%2C mitochondrial	Aldedh
100144890	210.7235382	265.2716947	263.0012062	154.1405222	124.7927749	142.3131192	-0.803268326	2.87E-16	4.93E-15	LOC100144890	NC_042496.1	6203212	6206828	-	596	protein_coding	macrophage migration inhibitory factor-like protein	MIF
100161110	97.90173295	103.4027395	98.81405128	132.577105	124.0566036	137.563341	0.400270756	9.24E-11	9.71E-10	LOC100161110	NC_042494.1	135831702	135839927	+	1700	protein_coding	uncharacterized protein LOC100161110%2C transcript variant X4	-
100162954	207.5901084	148.798522	174.4779841	119.5478944	123.7228205	125.8127529	-0.518297745	6.23E-08	4.78E-07	LOC100162954	NC_042494.1	53255968	53284357	-	3747	protein_coding	mucin-5AC%2C transcript variant X2	-
100158783	213.2628519	198.8667481	196.199477	91.71093432	123.4486187	112.1078855	-0.887983724	1.03E-22	2.69E-21	LOC100158783	NC_042493.1	78636847	78645857	-	2518	protein_coding	uncharacterized LOC100158783%2C transcript variant X2	CBM_14
100159664	80.89332623	82.79518597	79.06924406	124.3868382	123.1987596	120.11596	0.605796336	8.69E-29	3.03E-27	LOC100159664	NC_042495.1	48616477	48621240	+	2038	protein_coding	mitochondrial 2-oxoglutarate/malate carrier protein	Mito_carr
100165067	140.1943032	153.3541746	149.0172968	132.7307616	122.8155366	130.1729402	-0.191180211	0.002890206	0.010057074	LOC100165067	NC_042495.1	76891939	76895898	-	985	protein_coding	nuclear transport factor 2-like	-
100166173	154.5585842	196.6387148	179.1439258	53.61102886	122.338788	93.12371133	-0.972282274	0.003527031	0.012003013	LOC100166173	NC_042494.1	107395230	107404570	-	2453	protein_coding	DNA-directed RNA polymerase II subunit RPB1	-
100160152	894.6387923	592.3190967	755.3084191	61.22773496	121.7624956	98.34027738	-2.989108127	8.93E-21	2.05E-19	LOC100160152	NC_042494.1	102812207	102813917	-	1529	protein_coding	uncharacterized protein LOC100160152	-
100161729	143.7698639	155.6432052	144.5944734	102.3128566	121.5158773	115.1667352	-0.382511557	9.57E-08	7.21E-07	LOC100161729	NC_042494.1	111606483	111613733	-	1810	protein_coding	uncharacterized LOC100161729	CBM_14
100168875	132.8094618	150.5432356	149.3265877	128.3062922	120.7696528	131.810057	-0.17661504	0.013096948	0.037555534	LOC100168875	NC_042496.1	35052830	35053928	+	861	protein_coding	mitochondrial import receptor subunit TOM22 homolog	-
100161043	111.7220576	111.7175215	108.5297911	124.9611107	120.6894481	123.3046486	0.159138117	0.002291556	0.008187019	LOC100161043	NC_042494.1	123488903	123496284	-	2338	protein_coding	trehalase%2C transcript variant X2	-
100159096	51.50552062	38.5742393	44.01790368	120.3425285	120.651566	122.3642745	1.443966075	3.08E-57	3.13E-55	LOC100159096	NC_042494.1	129965225	130004901	-	1692	protein_coding	progestin and adipoQ receptor family member 3	-
100164049	206.8994717	205.4968822	204.4499309	79.89615543	120.6345013	102.1960217	-1.020417818	6.06E-22	1.49E-20	LOC100164049	NC_042496.1	3959426	3984679	+	3363	protein_coding	laccase-5	-
100158766	150.9900858	135.8174185	144.1462207	104.6366334	120.5453393	113.7113455	-0.340235097	9.80E-07	6.43E-06	LOC100158766	NC_042495.1	13845892	13866885	-	2178	protein_coding	uncharacterized LOC100158766	-
100162975	161.7045984	141.4328047	151.4774989	129.1506055	120.149059	129.0769747	-0.25836142	0.00020843	0.000943316	Cpap3-b	NC_042494.1	84322820	84336560	-	1196	protein_coding	cuticular protein analogous to peritrophins 3-B	CBM_14
100166007	80.83210929	59.96538889	71.46979393	128.4622905	120.1406203	118.9026552	0.798126733	4.66E-18	9.02E-17	LOC100166007	NC_042496.1	36200749	36241459	-	3106	protein_coding	elongation of very long chain fatty acids protein AAEL008004%2C transcript variant X1	ELO
100163442	40.39191656	46.57429568	46.04369039	125.238704	120.0097339	131.6218934	1.510037501	4.62E-101	1.43E-98	LOC100163442	NC_042494.1	62991338	63005439	+	2141	protein_coding	venom protease%2C transcript variant X2	Trypsin
100166927	83.3905543	84.4517036	89.60844909	121.9132788	119.8699238	122.870743	0.509367895	1.13E-18	2.27E-17	LOC100166927	NC_042494.1	81726669	81731000	-	1680	protein_coding	sporozoite surface protein 2%2C transcript variant X1	-
100164362	166.8550777	192.4975179	175.1390225	125.0157484	119.8150801	129.6752043	-0.506085636	1.06E-13	1.46E-12	Obp5	NC_042493.1	73877203	73888190	-	1283	protein_coding	odorant-binding protein 5	-
100162752	101.0825726	103.7758883	103.6647385	118.6187819	119.8009122	117.6769061	0.213846748	4.86E-05	0.000249573	LOC100162752	NC_042495.1	86740618	86745388	-	1804	protein_coding	acetyl-CoA acetyltransferase%2C mitochondrial	Thiolase_N
100165411	137.5292665	152.1294078	140.1372339	126.7144287	119.4891637	132.0547118	-0.177272692	0.004469541	0.014773928	LOC100165411	NC_042494.1	122393937	122402316	+	3461	protein_coding	putative ATP-dependent RNA helicase Pl10	DEAD
100159597	110.1845749	109.5073446	106.4369773	126.319979	119.3119514	115.5490844	0.154115293	0.005923364	0.018986776	LOC100159597	NC_042494.1	116034039	116041425	+	4118	protein_coding	neuroplastin%2C transcript variant X3	I-set
100159315	85.03195922	107.528037	90.36962619	118.8734046	119.167328	137.1591865	0.414374241	9.19E-06	5.28E-05	LOC100159315	NC_042496.1	34897843	34904195	-	766	protein_coding	troponin C	-
100165913	131.6435959	135.9930815	132.9417854	123.2122689	118.7667569	118.0025585	-0.147228923	0.003579391	0.012144528	LOC100165913	NC_042495.1	86384644	86392851	+	3496	protein_coding	far upstream element-binding protein 3%2C transcript variant X2	KH_1
100168831	129.8915254	138.8703425	135.6471231	124.6506834	118.6787815	119.7129182	-0.14853426	0.016563542	0.045926713	LOC100168831	NC_042494.1	78137413	78139557	-	864	protein_coding	transmembrane emp24 domain-containing protein 2-like	-
100164885	177.2404732	168.4426865	169.5250025	113.5132514	118.6143614	112.4092068	-0.573856414	4.63E-24	1.28E-22	LOC100164885	NC_042494.1	129425380	129432037	-	1566	protein_coding	aldehyde dehydrogenase	Aldedh
100160429	163.4422613	165.4016603	156.3326578	125.4491403	118.604658	129.1315044	-0.37187936	1.15E-10	1.19E-09	LOC100160429	NC_042494.1	44001940	44022115	-	2267	protein_coding	synaptic vesicle membrane protein VAT-1 homolog-like	ADH_N
100167353	109.466728	119.0144456	110.1484238	144.3487628	118.4385496	126.2395285	0.207302581	0.006480819	0.020515226	LOC100167353	NC_042495.1	47954938	47975307	-	3118	protein_coding	uncharacterized LOC100167353	-
100570286	125.3499515	139.9239657	150.1327846	118.1938906	118.2761949	121.1441803	-0.208731798	0.003697022	0.012497947	LOC100570286	NC_042495.1	12959218	12960707	-	1239	protein_coding	single-pass membrane and coiled-coil domain-containing protein 4	-
100165873	438.1842624	288.1298578	355.1178323	130.2232161	117.59996	119.3932275	-1.552150824	1.98E-17	3.69E-16	cp33	NC_042494.1	62343846	62344707	+	713	protein_coding	cuticular protein 33	Chitin_bind_4
100166030	136.8945314	154.2610787	140.8325617	130.3062119	116.9694093	130.5633178	-0.186162498	0.009712264	0.029027089	LOC100166030	NC_042494.1	160821611	160823894	-	1003	protein_coding	small nuclear ribonucleoprotein-associated protein B	LSM
100167414	132.0476529	138.5679162	132.6704665	119.2767271	116.9529464	119.5906986	-0.173752185	0.000572095	0.002375873	LOC100167414	NC_042494.1	163455373	163483469	-	3357	protein_coding	cytoplasmic aconitate hydratase	Aconitase
100166800	156.9355624	180.9524448	163.1003465	128.0089427	116.891414	119.6562734	-0.451445935	3.86E-11	4.21E-10	LOC100166800	NC_042494.1	43742538	43745932	+	1971	protein_coding	proliferation-associated protein 2G4	Peptidase_M24
100165225	136.6982597	155.3772962	146.1898758	127.75073	116.5481991	125.5605314	-0.237654724	0.000321045	0.001401529	LOC100165225	NC_042496.1	8157034	8160280	-	1983	protein_coding	pescadillo homolog	-
100162364	81.76666063	101.0321634	89.30043977	117.5447692	116.4941512	120.320459	0.388376508	2.21E-07	1.58E-06	LOC100162364	NC_042494.1	4177122	4197846	-	2047	protein_coding	proclotting enzyme	Trypsin
100158857	154.3601009	157.1206481	153.1396001	120.593871	116.0947749	114.4079507	-0.397293442	9.61E-16	1.59E-14	LOC100158857	NC_042494.1	67082994	67103600	+	6468	protein_coding	fatty acid synthase	ketoacyl-synt
100163764	148.3995401	160.882021	155.0241086	116.1407691	116.031707	117.876109	-0.400512883	5.91E-14	8.39E-13	LOC100163764	NC_042495.1	64492524	64520159	+	2754	protein_coding	carboxypeptidase M%2C transcript variant X2	-
100162809	90.11863242	84.47843728	86.91447874	117.7724238	115.7475651	117.4184527	0.43096698	2.13E-15	3.44E-14	LOC100162809	NC_042496.1	33081694	33090905	-	2847	protein_coding	phosphatidylinositol transfer protein alpha isoform-like%2C transcript variant X2	IP_trans
100188892	101.2606057	128.5249514	113.5448037	147.8690091	115.6361309	139.2839977	0.237924172	0.014930026	0.042002679	Mlpt	NC_042495.1	52008892	52011555	+	1736	protein_coding	mille-pattes%2C transcript variant 1	-
100160550	89.88874118	80.13724169	82.07119236	90.40778918	115.5081399	109.1720215	0.328018869	0.0002002	0.00090946	LOC100160550	NC_042495.1	61982065	61991877	+	1810	protein_coding	uncharacterized LOC100160550%2C transcript variant X1	-
100163715	31.15160055	35.58688365	42.2234598	142.0540503	114.7399602	145.8938605	1.894933495	5.97E-59	6.45E-57	LOC100163715	NC_042494.1	160739087	160740240	+	559	protein_coding	uncharacterized LOC100163715	-
100168731	125.5497631	143.4604783	143.6241071	122.7206515	114.7309741	120.0540423	-0.199479048	0.004683976	0.015421346	LOC100168731	NC_042496.1	24337374	24339887	-	1057	protein_coding	proteasome subunit beta type-6	Proteasome
100163300	89.19483261	88.80660557	90.60619589	116.6065322	114.6155797	114.0058386	0.368984595	3.43E-10	3.42E-09	LOC100163300	NC_042494.1	159683148	159689239	-	1074	protein_coding	uncharacterized LOC100163300	-
100162976	141.6387939	154.8440136	148.8944001	115.422026	114.4403469	117.1644699	-0.35293603	2.76E-10	2.79E-09	LOC100162976	NC_042495.1	83473126	83476588	-	2034	protein_coding	translocating chain-associated membrane protein 1	LAG1
100160412	95.67004878	92.30855652	95.78040759	113.6635438	114.2356321	109.8811038	0.258203736	3.97E-07	2.74E-06	LOC100160412	NC_042494.1	59112093	59225173	-	5122	protein_coding	four and a half LIM domains protein 2%2C transcript variant X4	LIM
100161019	134.8984971	141.6572508	149.7298296	125.6799951	113.9332863	130.4737809	-0.196815784	0.006132658	0.019534615	LOC100161019	NC_042495.1	93014067	93015671	-	1026	protein_coding	proteasome subunit alpha type-3-like	Proteasome
100167470	69.94803992	62.43875392	62.7696469	126.3523158	113.6526268	117.8735526	0.881354203	5.85E-38	3.11E-36	LOC100167470	NC_042493.1	16227679	16244759	-	3709	protein_coding	very-long-chain 3-oxoacyl-CoA reductase	adh_short
100145854	123.8605305	134.4020912	130.8981888	95.54429305	113.5248541	107.7302946	-0.289816586	0.000219093	0.00098648	ORF2	NC_042494.1	45417322	45418725	-	669	protein_coding	chemosensory protein-like	-
100163338	63.58224082	59.00136088	59.49946044	116.6041521	113.2137913	120.6094742	0.950872563	1.90E-52	1.74E-50	LOC100163338	NC_042495.1	38029222	38051301	-	1736	protein_coding	uncharacterized LOC100163338%2C transcript variant X2	-
100168781	59.42645642	56.22939811	57.92912563	100.596127	112.898714	104.8042025	0.881323838	6.79E-44	4.56E-42	LOC100168781	NC_042494.1	37939244	37951196	-	2587	protein_coding	glycerol-3-phosphate acyltransferase 3	Acyltransferase
100165180	126.7035657	140.6893109	128.6185802	119.2609003	112.5553281	116.8768279	-0.176541706	0.003321531	0.011387317	LOC100165180	NC_042496.1	37626237	37636184	+	2790	protein_coding	eukaryotic translation initiation factor 5%2C transcript variant X1	-
100165436	77.7356676	83.75987586	84.21295497	100.7322708	111.7888345	105.321986	0.378607471	3.23E-08	2.57E-07	Aqp1	NC_042496.1	12016625	12033445	+	1070	protein_coding	aquaporin%2C transcript variant 1	-
100159232	126.8138443	126.3053925	128.6489879	108.8774814	111.5720095	108.8976287	-0.206266681	1.27E-05	7.17E-05	LOC100159232	NC_042495.1	8383458	8412206	-	5984	protein_coding	eukaryotic translation initiation factor 4 gamma 3%2C transcript variant X1	-
100159019	97.28252892	93.58426889	92.81187189	117.178135	111.1640946	115.6252091	0.284616289	6.65E-07	4.47E-06	LOC100159019	NC_042494.1	108768700	108771688	+	1828	protein_coding	putative aldehyde dehydrogenase family 7 member A1 homolog	Aldedh
100167731	122.1041823	144.3827631	142.2477967	113.1069617	110.8905978	116.5355086	-0.255917005	0.000633934	0.002601866	LOC100167731	NC_042496.1	3156614	3157741	+	922	protein_coding	39S ribosomal protein L12%2C mitochondrial	-
100158991	81.33014966	83.48872222	83.10511012	104.5557676	110.8724513	107.537467	0.388351515	6.44E-14	9.10E-13	LOC100158991	NC_042495.1	78675578	78690581	+	3666	protein_coding	alpha%2Calpha-trehalose-phosphate synthase [UDP-forming]	-
100167090	242.3447619	206.4655501	206.7080814	99.37116727	110.8264165	95.99468113	-1.091842481	3.65E-41	2.26E-39	Cpap3-a1	NC_042494.1	84316875	84319207	-	1338	protein_coding	cuticular protein analogous to peritrophins 3-A1	CBM_14
100573825	26.59520751	63.94210831	48.47114675	76.16382896	110.6470387	112.7361649	1.115794911	0.004617703	0.015219031	LOC100573825	NC_042496.1	556284	558517	+	572	protein_coding	uncharacterized LOC100573825	-
100572234	93.58828006	101.8830992	102.0011706	121.83879	110.5602259	116.3771824	0.236898241	0.000554173	0.002310567	LOC100572234	NC_042494.1	147820857	147822650	-	982	protein_coding	NADH dehydrogenase [ubiquinone] flavoprotein 3%2C mitochondrial	-
100168260	120.0729343	129.072584	123.734209	111.8991624	109.9198918	110.6031974	-0.158683678	0.003234213	0.011111972	LOC100168260	NC_042494.1	62158618	62160924	-	2307	protein_coding	nucleolysin TIAR	RRM_1
100169450	62.50782933	66.22919405	63.25130923	108.478428	109.8288083	111.5454452	0.78770074	2.35E-50	1.99E-48	Elovl6	NC_042494.1	134269952	134288878	-	3299	protein_coding	ELOVL family member 6%2C elongation of long chain fatty acids	ELO
100160920	136.7231867	138.3247131	132.0561047	115.5186501	109.1218956	108.1087677	-0.28409025	9.03E-08	6.83E-07	LOC100160920	NC_042494.1	67059247	67077504	+	6443	protein_coding	fatty acid synthase	Acyl_transf_1
100162476	82.70461908	77.45528164	75.89897152	80.06086999	108.6696089	94.18731491	0.267610684	0.003825384	0.012876699	LOC100162476	NC_042496.1	21671795	21677554	+	2991	protein_coding	programmed cell death protein 4	-
100572786	55.15075409	63.99490524	58.04459424	86.58076117	108.43429	106.8464861	0.775532486	2.16E-16	3.73E-15	LOC100572786	NC_042494.1	142624863	142637308	+	928	protein_coding	rhythmically expressed gene 5 protein	-
100163628	93.50224396	92.75090805	88.99541908	97.77986793	108.3624785	106.7596231	0.191426253	0.003844556	0.0129302	LOC100163628	NC_042495.1	7897726	7899163	-	1125	protein_coding	gamma-aminobutyric acid receptor-associated protein-like	-
100164574	61.93402299	80.31761934	71.37871827	138.1181761	108.2905866	125.7831533	0.808715294	2.12E-14	3.11E-13	LOC100164574	NC_042494.1	22352626	22353855	+	688	protein_coding	uncharacterized LOC100164574	-
100165866	37.82203243	40.63757665	42.32992467	93.85898561	108.199523	105.8039018	1.357101822	8.23E-74	1.30E-71	LOC100165866	NC_042493.1	9595700	9608489	-	1798	protein_coding	L-threonine dehydratase catabolic TdcB	PALP
100165684	82.99261429	88.23305523	81.7868237	111.0416581	108.1104084	105.3496053	0.365920914	2.40E-10	2.43E-09	LOC100165684	NC_042493.1	51266514	51277436	+	2291	protein_coding	adenylosuccinate synthetase	-
100163785	96.78657366	91.75614781	96.1167091	114.042615	107.9215167	109.78901	0.227643341	4.89E-05	0.000251174	Accoas	NC_042494.1	145951168	145957387	-	2713	protein_coding	acetyl coenzyme A synthase	AMP-binding
100144797	89.11629294	102.1305806	92.13864741	114.747974	107.7031286	111.4342457	0.243724814	0.000344167	0.001492966	LOC100144797	NC_042496.1	15571109	15574910	+	1419	protein_coding	protein tyrosine phosphatase-like	-
100162620	93.30552375	78.53806122	84.49270199	94.49271883	107.288452	101.2480373	0.247668827	0.001333046	0.005058074	LOC100162620	NC_042494.1	11342936	11346195	-	2149	protein_coding	leucine-rich repeat extensin-like protein 2	-
100166422	24.69886129	19.18526053	22.30208609	99.52261417	106.6978361	104.8557101	2.238057103	1.42E-119	6.98E-117	LOC100166422	NC_042493.1	118184918	118186629	-	713	protein_coding	uncharacterized LOC100166422	-
100163664	97.22171558	100.2231928	100.04119	116.7716524	106.3155501	117.5953115	0.202552401	0.000797144	0.003184739	LOC100163664	NC_042494.1	129086116	129090840	+	2396	protein_coding	innexin inx3	-
100161983	83.28491172	86.95904766	87.43044224	89.79549581	106.2522209	94.74582328	0.181405398	0.012715757	0.036650066	LOC100161983	NC_042496.1	31596913	31609271	+	1398	protein_coding	apolipoprotein D%2C transcript variant X1	-
100159628	130.7290392	139.5046399	134.3539938	114.5244326	105.8736267	113.5689086	-0.26975303	3.69E-06	2.24E-05	Shmt1	NC_042494.1	53331695	53336825	-	2272	protein_coding	serine hydroxymethyltransferase 1 (soluble)%2C transcript variant 3	SHMT
115033063	82.68051429	91.42919478	87.55694891	105.8535488	105.5788102	104.4901159	0.279110264	3.05E-05	0.000162303	LOC115033063	NC_042495.1	37116657	37118864	-	832	protein_coding	sorbitol dehydrogenase-like	ADH_zinc_N
100574272	71.70194188	61.39835789	89.76724963	138.2812653	105.4048499	95.15773116	0.613794514	0.000527165	0.002209364	LOC100574272	NC_042494.1	124603730	124603837	-	108	protein_coding	actin-1	-
100167065	148.1708208	122.7348563	153.1178735	94.50498399	105.3666653	90.40955903	-0.540017733	5.08E-09	4.45E-08	cp7	NC_042494.1	62567095	62568045	+	824	protein_coding	cuticular protein 7	Chitin_bind_4
100163368	116.4811368	127.15759	126.5583245	112.4451787	105.0104361	111.5365487	-0.163003266	0.012283524	0.035578697	LOC100163368	NC_042496.1	33529419	33530945	+	1061	protein_coding	surfeit locus protein 4 homolog	SURF4
100159342	0.712113746	0.151103424	0.328283318	119.1194328	104.8063473	116.8208086	8.137556135	4.32E-106	1.66E-103	LOC100159342	NC_042494.1	22423353	22424171	-	552	pseudogene	-	-
100159783	80.78294423	78.04807167	80.69850669	101.5808304	104.7377472	103.4573655	0.377774046	8.20E-08	6.22E-07	LOC100159783	NC_042493.1	1980912	1982664	+	599	protein_coding	sorbitol dehydrogenase	ADH_N
100571279	122.3437549	147.7833073	160.5350604	125.3665563	103.7558695	119.3733636	-0.297453369	0.004521538	0.014923914	LOC100571279	NC_042494.1	140722746	140723522	+	436	protein_coding	H/ACA ribonucleoprotein complex subunit 3	-
100166939	75.18774132	68.1080936	69.86339042	98.79884839	102.97641	96.01016814	0.488717302	3.49E-13	4.65E-12	LOC100166939	NC_042495.1	62698638	62700521	-	1341	protein_coding	DNA damage-inducible transcript 4-like	-
100160947	411.5050054	268.784481	340.0225441	76.4162399	102.6517381	91.16232396	-1.91097501	4.96E-19	1.02E-17	LOC100160947	NC_042494.1	156687978	156689358	+	1272	protein_coding	zinc finger protein 512B-like	-
100575359	259.2603432	198.9590914	231.7788059	42.09864255	102.2125034	77.34900694	-1.632600427	4.90E-06	2.92E-05	LOC100575359	NC_042494.1	125239402	125245014	-	1644	protein_coding	RNA polymerase II degradation factor 1	Chitin_bind_4
100167019	117.5786449	120.3506414	120.6645396	108.4000496	102.2065666	107.3750951	-0.166477669	0.001691711	0.006265286	LOC100167019	NC_042496.1	17212603	17221545	-	2942	protein_coding	zinc finger protein on ecdysone puffs	-
100169083	113.9109819	131.2971754	126.1321837	106.498379	102.1677244	105.9450685	-0.231722699	0.001960111	0.007133719	LOC100169083	NC_042494.1	149382418	149383678	+	607	protein_coding	uncharacterized LOC100169083	-
100161333	152.361897	149.7415019	139.4689809	101.2493053	102.1179304	102.3361636	-0.523938927	9.43E-20	2.03E-18	LOC100161333	NC_042494.1	37358257	37364478	-	2049	protein_coding	protein RCC2 homolog	-
100165369	124.1427894	143.8126837	133.9149727	111.9150648	101.8745398	115.9019035	-0.27844529	0.000125194	0.000594397	LOC100165369	NC_042495.1	76402171	76404091	-	1840	protein_coding	la protein homolog	-
100161259	63.34196428	59.01841373	59.50432813	90.38282536	101.7072028	98.75611498	0.683824321	6.40E-26	1.93E-24	LOC100161259	NC_042494.1	17839774	17863225	-	3088	protein_coding	acetyl-CoA acetyltransferase%2C cytosolic%2C transcript variant X3	Thiolase_N
100164626	178.9622971	188.9902165	188.3806035	116.4863374	101.4867686	112.0831623	-0.746171009	1.58E-27	5.15E-26	LOC100164626	NC_042495.1	99466616	99473656	+	948	protein_coding	glutathione S-transferase 1-1-like	GST_C
100168710	60.21702216	59.35586851	59.01136321	102.0243942	101.4822681	109.5581039	0.816434294	5.56E-40	3.29E-38	LOC100168710	NC_042494.1	140451141	140456167	-	1583	protein_coding	1-acyl-sn-glycerol-3-phosphate acyltransferase delta	Acyltransferase
100159662	188.0776133	171.0177645	177.1514622	95.94461499	101.4690859	93.91445763	-0.873674089	5.62E-44	3.79E-42	LOC100159662	NC_042493.1	27406370	27423312	+	1718	protein_coding	uncharacterized LOC100159662	-
100159764	90.99949901	92.95780337	87.85861731	101.3880577	101.3287134	107.396551	0.196818121	0.000592031	0.002445152	LOC100159764	NC_042494.1	58622872	58631910	+	2127	protein_coding	probable medium-chain specific acyl-CoA dehydrogenase%2C mitochondrial%2C transcript variant X1	-
103310328	73.76764814	78.78548086	73.10499911	78.11779481	100.9144387	91.09264092	0.26620312	0.001364887	0.005163986	LOC103310328	NC_042496.1	27937902	27961996	-	4077	protein_coding	nidogen-2	EGF_CA
100161360	113.6862713	113.2127386	110.2770942	104.5504985	100.1635748	101.0869268	-0.134126932	0.009664868	0.02891214	LOC100161360	NC_042496.1	13264267	13274738	+	3245	protein_coding	ATP-dependent RNA helicase me31b%2C transcript variant X2	DEAD
100166768	76.86330899	74.34288454	68.00648113	106.6252978	99.48462462	106.8873811	0.519844669	2.05E-12	2.53E-11	LOC100166768	NC_042494.1	160071122	160073168	+	874	protein_coding	uncharacterized LOC100166768	-
100167701	72.4590675	77.00833931	77.15721461	106.8214119	99.34512163	108.9217339	0.482561129	1.34E-14	2.00E-13	LOC100167701	NC_042494.1	63547243	63564891	+	1883	protein_coding	uncharacterized LOC100167701	-
100158742	51.62369706	57.27785133	52.99549278	111.2005711	98.98625249	107.7445304	0.980736581	2.87E-48	2.25E-46	LOC100158742	NC_042496.1	33423274	33444995	-	2927	protein_coding	uncharacterized LOC100158742	Serpin
100164120	68.3423008	71.50149201	68.50119904	106.0449418	98.90324627	105.7159703	0.58319405	1.22E-16	2.15E-15	LOC100164120	NC_042494.1	107416896	107418113	-	746	protein_coding	serine/arginine-rich splicing factor 8	-
100164709	44.02853808	30.94208176	40.18823205	104.0741762	98.76946995	102.9568973	1.414981321	5.36E-41	3.29E-39	LOC100164709	NC_042495.1	11302120	11334789	-	1116	protein_coding	protein pinocchio	-
100159668	127.3531363	123.46984	127.98712	98.46234366	98.25263994	96.03408809	-0.365015413	1.49E-13	2.04E-12	LOC100159668	NC_042494.1	3785582	3810103	+	5404	protein_coding	mucin-5AC%2C transcript variant X2	CBM_14
100162529	67.44172288	64.34023552	62.37691587	80.90790786	98.24705505	88.17343804	0.467784778	1.06E-09	1.00E-08	LOC100162529	NC_042496.1	33826079	33838087	-	2128	protein_coding	leucine-rich repeat-containing protein 58	-
100159070	191.9557312	153.5119439	170.124354	85.03476784	97.75676687	90.6220998	-0.908913714	4.11E-27	1.30E-25	LOC100159070	NC_042494.1	100515661	100525707	-	2382	protein_coding	protein yellow	-
100161674	28.04727352	20.66441418	25.6309419	119.2443664	97.58133541	113.3283212	2.156699887	3.90E-76	6.69E-74	cprr1-2	NC_042494.1	164733423	164734297	-	555	protein_coding	RR1 cuticle protein 2	-
100168309	115.8525146	137.8917952	136.4177461	100.2329656	97.25277873	102.0758183	-0.373707996	1.34E-06	8.67E-06	LOC100168309	NC_042495.1	33222874	33224796	-	891	protein_coding	mRNA turnover protein 4 homolog	-
100163495	107.468748	120.9033535	119.1601267	100.8237784	97.12244237	100.9717527	-0.209978623	0.003126341	0.010781265	LOC100163495	NC_042496.1	23874003	23877336	-	733	protein_coding	activator of heat shock 90kDa protein ATPase-like	-
100158954	56.111502	66.61298225	61.2480357	108.5083864	97.02737619	96.47466941	0.722460758	4.82E-22	1.20E-20	LOC100158954	NC_042494.1	130744978	130769679	-	3722	protein_coding	lysosomal alpha-mannosidase	-
100167687	129.0116494	142.1554922	137.4606805	96.50093819	96.87105231	96.21135028	-0.489737761	6.42E-19	1.32E-17	LOC100167687	NC_042496.1	8776926	8791262	+	3475	protein_coding	uncharacterized LOC100167687%2C transcript variant X2	Zona_pellucida
100163836	448.0972806	274.0666448	409.1631036	97.74052879	96.65470014	105.590553	-1.909121436	4.03E-20	8.94E-19	cp34	NC_042494.1	62338803	62339671	+	726	protein_coding	cuticular protein 34	Chitin_bind_4
100163550	116.8071935	120.2467858	116.4957272	101.195347	96.64026751	95.80327025	-0.260952379	7.84E-07	5.21E-06	LOC100163550	NC_042493.1	80429140	80435093	+	3162	protein_coding	zinc finger protein on ecdysone puffs	-
100161080	113.8954573	112.7169999	111.4368808	102.5047196	96.53216636	99.97057475	-0.170270524	0.001443754	0.005438898	LOC100161080	NC_042494.1	58214082	58218958	+	2799	protein_coding	uncharacterized LOC100161080	-
100167567	119.3075605	139.518994	130.6102494	97.68795206	96.31290729	106.5748288	-0.366522281	3.04E-07	2.12E-06	LOC100167567	NC_042493.1	82093475	82102230	+	1821	protein_coding	H/ACA ribonucleoprotein complex subunit 4	-
100162280	67.20006294	82.10975239	77.26568564	91.68613718	96.13795084	100.1394181	0.353387358	1.46E-05	8.17E-05	LOC100162280	NC_042494.1	161843684	161851860	+	995	protein_coding	uncharacterized LOC100162280	-
100162681	117.3652468	128.3151387	129.9694175	112.3846628	96.03400989	105.7440066	-0.250613217	0.000647481	0.002650572	LOC100162681	NC_042494.1	122821570	122825351	+	1472	protein_coding	proliferating cell nuclear antigen-like%2C transcript variant X1	PCNA_C
100162337	55.08867567	70.16558557	57.87070391	88.71400662	95.54049502	92.33757761	0.602159073	2.10E-12	2.59E-11	LOC100162337	NC_042494.1	155326764	155336353	-	1669	protein_coding	uncharacterized LOC100162337	-
100169545	113.5380908	124.0225277	112.4939136	100.8690622	95.17717693	101.0111806	-0.229924131	0.000255136	0.001135126	Ola1	NC_042494.1	16898306	16912905	-	1720	protein_coding	Obg-like ATPase 1	-
100169062	72.0839096	79.41813306	79.94420306	97.68692208	95.12498129	98.97920964	0.341528936	2.93E-08	2.34E-07	LOC100169062	NC_042494.1	104155362	104164940	+	2184	protein_coding	uncharacterized LOC100169062%2C transcript variant X2	-
100160987	152.4514792	161.009848	153.2310666	82.2387325	95.10687825	86.42159659	-0.816377837	6.51E-37	3.33E-35	LOC100160987	NC_042495.1	11974234	11992937	-	3468	protein_coding	uncharacterized LOC100160987	Zona_pellucida
100572989	103.7224401	120.2665014	109.7127384	97.90940995	94.97352988	99.96503487	-0.181262631	0.006892113	0.02166073	LOC100572989	NC_042496.1	9347221	9350309	-	1738	protein_coding	probable ATP-dependent RNA helicase pitchoune	DEAD
100159184	98.65750847	103.67661	101.9510266	89.5751491	94.68489757	87.75724364	-0.154764051	0.005005794	0.016368983	LOC100159184	NC_042496.1	24715457	24745305	-	3566	protein_coding	neprilysin-2%2C transcript variant X1	-
100163823	124.6732203	129.5357338	132.1672102	106.0616957	94.16015444	103.330801	-0.341005829	1.24E-07	9.19E-07	LOC100163823	NC_042496.1	9270195	9273649	+	1707	protein_coding	methionine aminopeptidase 2	Peptidase_M24
100162497	32.45251389	37.95436885	37.54186954	71.7776242	93.71189952	88.0097415	1.239012374	2.78E-35	1.29E-33	LOC100162497	NC_042496.1	12731709	12735748	+	1290	protein_coding	uncharacterized LOC100162497	-
100159884	110.1986893	115.3558408	113.2819452	108.6115762	93.68899796	99.66586402	-0.159138166	0.017896606	0.049113716	LOC100159884	NC_042495.1	106613606	106622539	+	1872	protein_coding	probable methylthioribulose-1-phosphate dehydratase%2C transcript variant X1	Aldolase_II
103308689	24.5096958	22.96221073	23.62203466	115.1341448	93.47171126	95.81407867	2.104939856	2.93E-113	1.25E-110	LOC103308689	NC_042496.1	15886398	15887494	+	1097	protein_coding	uncharacterized LOC103308689	-
100166123	47.61125955	48.33050073	48.77492414	101.0512962	93.36908338	98.1905952	1.022789715	1.62E-51	1.42E-49	LOC100166123	NC_042494.1	123998863	124004237	-	1070	protein_coding	uncharacterized LOC100166123%2C transcript variant X2	-
100164423	117.2034504	137.4563404	130.0798511	106.9878663	93.34697232	107.1875807	-0.31588941	7.67E-05	0.000379563	LOC100164423	NC_042493.1	6031190	6032855	+	1088	protein_coding	28 kDa heat- and acid-stable phosphoprotein-like	-
100160933	122.429279	137.4821135	127.1785041	95.25290704	93.32114007	94.16514746	-0.446084693	1.75E-11	1.98E-10	LOC100160933	NC_042494.1	27975304	27976913	+	934	protein_coding	deoxyuridine 5'-triphosphate nucleotidohydrolase%2C mitochondrial-like	-
100166262	389.658479	317.0620065	349.7183646	46.6448179	93.24640989	69.81128998	-2.326901423	1.04E-15	1.71E-14	LOC100166262	NC_042494.1	129186149	129187277	+	1009	protein_coding	osiris 20-like	-
100167008	61.95910652	59.4099044	60.08185246	94.41309976	92.75564437	89.18982834	0.613617893	2.15E-22	5.44E-21	LOC100167008	NC_042493.1	75242501	75253422	+	1312	transcribed_pseudogene	uncharacterized LOC100167008	-
100161090	53.46141831	44.27493297	43.30203661	97.76543287	92.6107281	95.80400103	1.026697494	3.28E-35	1.50E-33	LOC100161090	NC_042494.1	42299006	42313108	+	1947	protein_coding	serine-threonine kinase receptor-associated protein	WD40
100165125	66.07693031	71.16219432	71.68939011	104.0306822	92.49534581	96.04665359	0.493216612	1.17E-11	1.34E-10	LOC100165125	NC_042494.1	158218920	158220559	+	1025	protein_coding	calcineurin B homologous protein 1	-
100160827	57.87196417	57.64944139	60.78195158	91.74474652	92.49200853	89.42189836	0.641512766	1.27E-24	3.63E-23	LOC100160827	NC_042495.1	36942115	36943562	+	1279	protein_coding	gamma-glutamylcyclotransferase-like	-
100160252	178.6045206	132.6017328	172.1178796	119.4430908	92.42099048	106.4188384	-0.596202597	1.22E-07	9.11E-07	LOC100160252	NC_042494.1	62618407	62619341	-	802	protein_coding	cuticle protein 7	Chitin_bind_4
100166426	63.77470538	74.51893447	65.35578889	92.2172332	92.33765848	88.91576484	0.432423095	4.98E-11	5.37E-10	LOC100166426	NC_042494.1	51367004	51390380	+	7426	protein_coding	fatty acid synthase	Acyl_transf_1
100187585	284.8115362	197.6421161	254.5685619	61.76157962	92.08704997	81.99461153	-1.638062036	1.93E-13	2.61E-12	cp21	NC_042494.1	62517004	62521816	-	1560	protein_coding	cuticular protein 21	Chitin_bind_4
100159107	101.2027768	108.2459167	102.3811407	93.702602	91.7889546	95.08183339	-0.14545203	0.007141233	0.022305926	LOC100159107	NC_042494.1	157860137	157872581	-	3051	protein_coding	translocation protein SEC63 homolog%2C transcript variant X1	DnaJ
100162463	107.8014742	114.0634731	107.8500112	96.27213691	91.60887439	93.07946617	-0.223927193	0.000141262	0.000663301	LOC100162463	NC_042494.1	149892597	149896663	+	1487	protein_coding	mitochondrial inner membrane protein OXA1L	-
100167199	100.7605146	109.5423849	108.8708527	83.51173108	91.16249524	85.01155833	-0.290346985	1.62E-05	8.99E-05	LOC100167199	NC_042494.1	155253453	155257103	+	1074	protein_coding	uncharacterized LOC100167199	-
100167511	98.3242487	107.6624016	110.7745537	93.95308762	90.85899743	92.57846329	-0.183930216	0.009833358	0.029338292	LOC100167511	NC_042495.1	35553396	35554833	-	748	protein_coding	prefoldin subunit 2-like	-
100163029	105.2788963	110.6940511	109.4777969	93.09580663	90.68706136	92.2877539	-0.230393607	1.44E-05	8.04E-05	LOC100163029	NC_042496.1	40784070	40789723	+	2415	protein_coding	heterogeneous nuclear ribonucleoprotein H2%2C transcript variant X1	RRM_1
100160904	79.64143139	76.33296811	72.19140959	87.27752895	90.15987781	88.45060354	0.227197869	0.000115009	0.000549516	LOC100160904	NC_042494.1	28328770	28344610	-	2994	protein_coding	uncharacterized LOC100160904%2C transcript variant X2	-
100161441	109.3097687	117.4699536	115.1231665	99.68580821	90.05561261	98.56580393	-0.238903604	0.000205661	0.00093212	LOC100161441	NC_042494.1	92188423	92191431	+	1615	protein_coding	eukaryotic translation initiation factor 3 subunit E	-
100163085	56.39336958	64.84098867	61.03111693	94.72510983	89.64359781	92.96852177	0.613000039	1.10E-17	2.08E-16	LOC100163085	NC_042494.1	165608404	165612225	+	1132	protein_coding	eukaryotic translation initiation factor eIF1	SUI1
103311364	35.64112264	32.32601095	37.82483537	79.11238484	89.62761891	91.90809963	1.30815507	1.48E-35	7.03E-34	LOC103311364	NW_021765706.1	32	449	+	418	protein_coding	uncharacterized LOC103311364	-
100165693	103.970484	99.52064812	104.8986889	85.12840725	89.53671461	85.0903122	-0.240776324	9.68E-05	0.000468394	LOC100165693	NC_042495.1	8059443	8078587	-	1214	protein_coding	high-affinity copper uptake protein-like%2C transcript variant X1	-
100163094	113.7278558	112.205951	108.6365919	91.21706698	89.41561076	90.27221444	-0.297853584	2.60E-08	2.10E-07	LOC100163094	NC_042496.1	41453845	41467398	+	2294	protein_coding	facilitated trehalose transporter Tret1	Sugar_tr
100160727	71.0379324	73.54454888	68.60890712	89.43638073	89.19750483	90.17751882	0.341051395	2.78E-08	2.23E-07	LOC100160727	NC_042494.1	59239382	59250813	-	1281	protein_coding	uncharacterized LOC100160727	-
100159991	50.20518793	45.65950487	50.59075436	84.3795523	89.13626665	92.29047406	0.866562501	1.75E-35	8.26E-34	LOC100159991	NC_042493.1	3883048	4404396	-	1645	protein_coding	legumain%2C transcript variant X2	-
100167888	70.62073911	73.08517075	78.13303902	78.71573873	88.90931478	82.30507119	0.179274668	0.013093078	0.037551262	Cpped1	NC_042495.1	78699751	78714404	+	1224	protein_coding	calcineurin-like phosphoesterase domain containing 1%2C transcript variant X1	Metallophos
115033876	73.03576272	68.91959549	71.30789737	91.84931689	88.8030038	85.61641748	0.326958904	1.01E-05	5.79E-05	LOC115033876	NC_042494.1	145926294	145926955	-	662	protein_coding	acetyl-coenzyme A synthetase-like	-
100163972	72.56708168	72.45443991	74.23862502	84.35612353	88.78975704	88.01163229	0.259172287	3.95E-05	0.000205356	LOC100163972	NC_042493.1	42105244	42112556	-	1085	protein_coding	MACRO domain-containing protein 2-like	A1pp
100159375	102.9647219	96.69526359	96.77747201	93.09378532	88.70031737	85.30006118	-0.143692139	0.016799914	0.046467786	LOC100159375	NC_042493.1	3796053	3804042	-	3208	protein_coding	glucose-6-phosphate 1-dehydrogenase%2C transcript variant X1	G6PD_C
100166254	110.1713886	124.7022703	111.9490833	92.57449606	88.66412743	91.55040149	-0.339359076	1.15E-07	8.59E-07	LOC100166254	NC_042494.1	90954469	90958027	+	2129	protein_coding	ATP-binding cassette sub-family E member 1	ABC_tran
100166780	69.72340384	80.4301939	75.2682354	104.9211751	88.52210739	98.3949347	0.379803491	4.63E-07	3.16E-06	LOC100166780	NC_042494.1	59006976	59032694	-	4844	protein_coding	uncharacterized LOC100166780%2C transcript variant X3	-
100168737	148.6089863	134.2215241	134.9625206	112.7156416	88.45958885	94.94392809	-0.489926474	5.22E-08	4.05E-07	LOC100168737	NC_042494.1	10256778	10257734	-	957	protein_coding	uncharacterized LOC100168737	-
115034459	128.0199142	101.8670514	120.587578	77.50019495	88.32291226	89.96445708	-0.448204476	1.33E-06	8.58E-06	LOC115034459	NC_042496.1	21833321	21842220	+	958	protein_coding	alpha-N-acetylgalactosaminidase-like	-
100159258	69.2281676	75.19015805	73.66485634	97.70041866	88.29567909	95.64804142	0.376195534	2.39E-08	1.94E-07	LOC100159258	NC_042494.1	112653492	112658733	+	1436	protein_coding	ribosome biogenesis protein WDR12 homolog	WD40
100573220	64.60399174	70.05355593	96.08089051	108.0276878	88.1613636	92.61231152	0.332779891	0.014500815	0.040992538	LOC100573220	NC_042494.1	168954160	168955864	+	331	protein_coding	cytochrome b-c1 complex subunit 9	-
100169630	97.79628229	108.6286526	105.1192237	87.90702613	88.01047405	90.86914581	-0.216614154	0.000415133	0.001777356	LOC100169630	NC_042496.1	40805249	40808621	+	1695	protein_coding	26S proteasome regulatory subunit 10B	AAA
100162990	120.6515996	135.5237063	130.53435	92.83442583	87.76748154	89.37024924	-0.51107582	1.66E-12	2.07E-11	Rps27-2	NC_042494.1	142749555	142755028	+	649	protein_coding	ribosomal protein S27-2	-
100168999	76.75507926	77.26866231	73.73063409	79.80987958	87.55739331	86.41207993	0.162675374	0.007876391	0.024308651	LOC100168999	NC_042493.1	42454148	42459808	+	2153	protein_coding	FAD-dependent oxidoreductase domain-containing protein 1	DAO
100159005	51.8025917	59.30548863	59.66832316	66.91521942	87.50048381	79.78355899	0.462829326	1.47E-06	9.44E-06	LOC100159005	NC_042495.1	78910693	78914625	-	1334	protein_coding	uncharacterized protein LOC100159005	-
100159353	38.91401335	46.51982879	44.80276253	85.5963412	87.42669846	84.18499522	0.989747975	2.31E-35	1.08E-33	LOC100159353	NW_021761220.1	2887	4719	+	996	protein_coding	angiotensin-converting enzyme	Peptidase_M2
100164295	116.5692651	120.1954576	112.4976258	91.18949609	87.19305902	98.23738977	-0.32983687	1.36E-06	8.74E-06	Ndufs4	NC_042494.1	104207031	104211150	+	1043	protein_coding	NADH dehydrogenase (ubiquinone) Fe-S protein 4%2C 18kDa (NADH-coenzyme Q reductase)	-
100160305	155.398641	124.2281881	142.2094062	91.49966888	86.93720673	92.33533324	-0.633345948	7.63E-14	1.07E-12	cprr1-10	NC_042495.1	79165223	79175075	-	942	protein_coding	RR1 cuticle protein 10	Chitin_bind_4
100162552	80.38107429	77.74210768	78.49221606	90.39616906	86.74131666	88.77428558	0.175167119	0.000420221	0.001797188	LOC100162552	NC_042493.1	1672773	1814775	-	9383	protein_coding	filamin-A%2C transcript variant X1	CH
100162453	94.47158563	100.6198014	101.3433127	91.85950115	86.65310894	88.97141306	-0.141096082	0.016934847	0.04681638	LOC100162453	NC_042495.1	43231200	43234748	+	1924	protein_coding	ubiquitin carboxyl-terminal hydrolase 14	UCH
100164129	114.1743534	119.321337	122.8410925	81.9354486	86.49611534	87.64941233	-0.469613072	1.67E-14	2.47E-13	LOC100164129	NC_042496.1	27856518	27862743	+	1404	protein_coding	bifunctional endo-1%2C4-beta-xylanase XylA	-
100162999	93.06520355	98.56100579	93.29082392	87.88291786	86.45145471	83.98306688	-0.134442368	0.014358873	0.040656846	LOC100162999	NC_042494.1	11656551	11662138	-	2835	protein_coding	KH domain-containing%2C RNA-binding%2C signal transduction-associated protein 2%2C transcript variant X2	KH_1
100159654	107.5736681	115.0723754	109.6509693	90.67593976	86.1701225	93.17242355	-0.292494	1.08E-06	7.06E-06	LOC100159654	NC_042495.1	6725730	6749966	-	1815	protein_coding	tubulin beta chain	Tubulin
100169068	72.45374341	69.9588654	69.14177456	78.16883876	85.67417395	79.90438695	0.210977716	0.000261359	0.001160556	LOC100169068	NC_042495.1	89757695	89778827	-	4713	protein_coding	uncharacterized LOC100169068%2C transcript variant X1	-
103310513	462.763348	299.4549877	411.1034065	92.4230144	85.61946191	80.83482298	-2.17412092	1.17E-30	4.38E-29	LOC103310513	NC_042494.1	62347692	62348599	-	765	protein_coding	cuticle protein 7-like	Chitin_bind_4
100162316	75.01629042	78.47263363	77.21044992	82.30113882	85.55033902	83.41408194	0.130165498	0.018053909	0.04950235	LOC100162316	NC_042495.1	89618077	89623038	-	2205	protein_coding	interferon-related developmental regulator 2	-
100160268	347.5414919	263.0949194	304.4914169	52.45014268	85.48776488	67.25460333	-2.151084722	2.18E-20	4.87E-19	Cpap3-d2	NC_042494.1	84276124	84289290	+	2622	protein_coding	cuticular protein analogous to peritrophins 3-D2	CBM_14
100160847	97.55744155	100.211109	97.24837942	80.76754718	85.27253539	86.61199023	-0.216918642	0.000214546	0.000968496	LOC100160847	NC_042496.1	2592078	2601515	+	1596	protein_coding	myeloid leukemia factor%2C transcript variant X2	-
100159632	66.1615211	76.28098804	70.65791819	75.97421473	85.26780394	80.42197187	0.188538289	0.006214023	0.019753906	LOC100159632	NC_042496.1	12851731	12857346	-	3645	protein_coding	uncharacterized LOC100159632	-
100168314	364.4218081	307.2194047	331.5141654	42.25254446	85.24381369	70.796116	-2.332909919	2.16E-16	3.74E-15	LOC100168314	NC_042494.1	129164683	129166660	+	1023	protein_coding	uncharacterized LOC100168314%2C transcript variant X1	-
100169369	100.7618395	104.2141854	105.775559	89.34560819	85.24146518	88.91342662	-0.23085985	0.000323579	0.001411419	LOC100169369	NC_042494.1	85884928	85885892	-	884	protein_coding	prefoldin subunit 6%2C transcript variant X2	-
100164179	81.90767666	73.5868865	76.07229305	84.86398079	85.04779534	85.26690905	0.14654584	0.01526954	0.042835621	LOC100164179	NC_042493.1	58488711	58504438	+	3142	protein_coding	L-asparaginase	-
100164639	167.1880212	178.9110381	174.4724326	45.30849391	84.90359832	67.93678995	-1.387054115	2.95E-08	2.36E-07	LOC100164639	NC_042495.1	47997338	48000197	-	1714	protein_coding	sulfotransferase-like%2C transcript variant X1	Sulfotransfer_1
100167110	305.9669262	213.5778213	255.5340885	99.38416345	84.6424666	89.8280174	-1.494753638	8.28E-43	5.33E-41	cp38	NC_042494.1	62362032	62363135	-	957	protein_coding	cuticular protein 38	Chitin_bind_4
100160261	48.73483734	42.83004563	44.7433458	73.08850703	84.11758036	76.78467468	0.785954663	6.59E-28	2.17E-26	LOC100160261	NC_042495.1	96918418	96939983	+	6151	protein_coding	uncharacterized LOC100160261	Trypsin
100168038	48.29596518	49.80934769	49.47088431	71.28641719	84.07449624	75.92147245	0.655061346	1.65E-19	3.51E-18	LOC100168038	NC_042494.1	19911442	19923052	-	1837	protein_coding	protein-glutamate O-methyltransferase	DUF89
100164477	47.6128347	49.71390378	49.73426295	82.91899802	83.62517658	83.38848583	0.772219312	5.51E-43	3.59E-41	LOC100164477	NC_042493.1	31472253	31496328	-	2239	protein_coding	spondin-1	Kunitz_BPTI
100162066	223.0795049	188.9992737	204.2446391	50.36392925	83.40639633	68.19974875	-1.603446349	1.03E-13	1.43E-12	LOC100162066	NC_042495.1	34437387	34460006	-	2856	protein_coding	glutamine--fructose-6-phosphate aminotransferase [isomerizing] 2%2C transcript variant X1	SIS
100162610	100.0619056	102.8989514	102.985446	87.04223568	83.03918726	89.79066535	-0.228579846	3.51E-05	0.000184534	LOC100162610	NC_042495.1	59354553	59369143	+	3107	protein_coding	RNA-binding protein lark%2C transcript variant X1	RRM_1
100162831	70.26106579	70.29160836	68.61797861	82.03031487	82.99518569	81.90016041	0.246083098	1.05E-05	6.01E-05	Ctsk1	NC_042493.1	87259645	87291783	+	1844	protein_coding	cathepsin K-1	Peptidase_C1
100168275	100.4017983	105.8160669	106.0670533	93.66987967	82.99421188	86.41804794	-0.240170845	0.000367396	0.001584583	LOC100168275	NC_042495.1	4888421	4908099	-	1301	protein_coding	myophilin%2C transcript variant X1	CH
100163324	99.78135729	122.0424883	117.9802697	53.00150809	82.90235472	65.69331417	-0.746364608	0.000232566	0.001042979	LOC100163324	NC_042495.1	59332906	59343460	-	4101	protein_coding	putative uncharacterized protein DDB_G0271606	-
100165303	92.4224278	94.21825583	92.20944	80.27703832	82.87729327	79.66693772	-0.192753355	0.000202587	0.000919772	LOC100165303	NC_042495.1	34488679	34502852	+	2967	protein_coding	ras GTPase-activating protein-binding protein 1	RRM_1
100165812	53.62565097	56.45667716	56.36486836	87.10476423	82.35407108	84.02519909	0.614018354	8.75E-24	2.41E-22	LOC100165812	NC_042495.1	6793564	6808304	+	1716	protein_coding	dnaJ homolog subfamily B member 6-like%2C transcript variant X1	DnaJ
100165454	88.53541861	107.5091637	98.70142205	87.83348837	82.18739186	89.4876933	-0.176395394	0.017971569	0.049293715	LOC100165454	NC_042494.1	72418919	72423033	+	2703	protein_coding	pre-rRNA 2'-O-ribose RNA methyltransferase FTSJ3	-
103310094	101.6923637	109.6128306	111.0527268	80.49333221	81.88332118	81.38409322	-0.395807919	1.77E-08	1.45E-07	LOC103310094	NC_042494.1	91079082	91079759	+	678	protein_coding	ubiquitin-fold modifier 1	-
100167755	72.38972489	69.22844041	70.06386	85.51818377	81.85083506	84.02994054	0.254777408	1.61E-06	1.03E-05	LOC100167755	NC_042494.1	115376382	115396553	-	4532	protein_coding	RING finger protein nhl-1%2C transcript variant X3	NHL
100574004	68.28313491	77.29515586	72.61110785	87.12156542	81.75263395	85.50558982	0.228653031	0.000972013	0.003814034	LOC100574004	NC_042495.1	89161643	89164877	-	1221	protein_coding	protein BCCIP homolog	-
100160408	87.89017413	99.12849539	92.38734333	81.87466563	81.68573327	84.36962787	-0.165324885	0.013385081	0.038284342	LOC100160408	NC_042495.1	6866311	6868119	-	1170	protein_coding	derlin-1	-
115032985	93.57399899	112.9101082	100.2798803	89.31379657	81.55652912	89.49393083	-0.229335578	0.004003214	0.01339243	LOC115032985	NC_042495.1	8420528	8423235	+	1138	protein_coding	eukaryotic translation initiation factor 6	-
100145853	16.0582773	19.47089167	20.07913332	100.0784952	81.06729238	92.8065193	2.310112052	3.74E-94	9.35E-92	ORF3	NC_042494.1	59518875	59519880	-	634	protein_coding	chemosensory protein-like	-
100167324	113.8962222	137.9399298	125.9156585	68.29096455	81.04570592	73.70081743	-0.753011676	3.65E-20	8.12E-19	LOC100167324	NC_042494.1	58748468	58753938	+	2185	protein_coding	FK506-binding protein 4	-
100168295	106.8280284	111.0337195	115.6503567	90.64667479	80.80194685	89.17280338	-0.348617896	7.49E-07	4.99E-06	LOC100168295	NC_042494.1	83313156	83324382	-	1013	protein_coding	MPA13 allergen-like%2C transcript variant X1	-
100167157	90.40710657	98.41606313	92.89273569	80.69118537	80.77336829	81.55232973	-0.206191597	0.000221518	0.000996546	LOC100167157	NC_042494.1	158220451	158225364	-	2754	protein_coding	protein transport protein Sec23A%2C transcript variant X1	-
100167617	49.39118468	51.12349285	57.40605749	74.16729547	80.62343779	85.54082338	0.613152319	1.45E-14	2.17E-13	LOC100167617	NC_042494.1	57950048	57963450	+	1501	protein_coding	uncharacterized LOC100167617	-
100167034	144.0161345	153.1301239	143.0569227	45.12663303	80.61582263	63.93463219	-1.208149339	2.47E-07	1.75E-06	LOC100167034	NC_042495.1	96720011	96725998	+	2605	protein_coding	mediator of RNA polymerase II transcription subunit 15	Chitin_bind_4
100160097	75.03795173	72.46315047	73.7878641	88.0468047	80.10519679	84.12582138	0.195855029	0.001181697	0.004555006	LOC100160097	NC_042493.1	85651331	85703084	-	2427	protein_coding	alpha-tocopherol transfer protein-like%2C transcript variant X1	-
100168171	90.32134532	101.325547	93.32322559	84.17772242	79.74973622	85.32567645	-0.18614694	0.003422346	0.011682031	LOC100168171	NC_042496.1	33671498	33680758	-	2351	protein_coding	antitrypsin	Serpin
100160586	35.45368056	38.39776834	37.07906139	74.05420837	79.52449154	79.31057228	1.077059223	1.91E-61	2.27E-59	LOC100160586	NC_042494.1	121087354	121110695	-	1917	protein_coding	hydroxymethylglutaryl-CoA lyase%2C mitochondrial%2C transcript variant X2	HMGL-like
100163322	107.148726	105.2118113	99.39775012	83.27653592	79.49691666	84.31589164	-0.328921045	1.33E-07	9.86E-07	LOC100163322	NC_042494.1	29676696	29681724	-	1448	protein_coding	acyl-protein thioesterase 1-like%2C transcript variant X1	Abhydrolase_2
100187584	226.3666276	139.2202303	187.5615088	86.59825207	79.35824936	80.6390086	-1.159546372	1.26E-08	1.06E-07	cp25	NC_042494.1	62480587	62481605	+	949	protein_coding	cuticular protein 25	Chitin_bind_4
100162293	171.3772357	113.8174655	120.0439134	78.27633021	79.14241276	79.04343985	-0.77162228	3.57E-10	3.55E-09	cp9	NC_042494.1	62621713	62622592	+	731	protein_coding	cuticular protein 9	Chitin_bind_4
100162533	88.7568468	98.5435553	99.81414263	84.9293133	78.89404937	87.20430051	-0.186487771	0.00850612	0.025912542	LOC100162533	NC_042495.1	107679682	107683295	+	1353	protein_coding	ribosome production factor 2 homolog	-
100165534	57.96846126	45.92524592	53.51223762	64.11757162	78.73008755	69.4028009	0.43743408	4.41E-06	2.64E-05	LOC100165534	NC_042494.1	107469860	107477727	-	2075	protein_coding	cysteine and histidine-rich protein 1 homolog	-
100162387	70.11509244	70.40422943	70.85474824	78.73812269	78.60845501	78.41799117	0.164419301	0.002478038	0.00877379	LOC100162387	NC_042494.1	92946927	92953999	-	2062	protein_coding	ectonucleoside triphosphate diphosphohydrolase 5	-
100161687	507.1644222	323.4289538	423.8849304	63.31817632	78.53711955	72.48426474	-2.543321292	2.99E-35	1.38E-33	cp19	NC_042494.1	62499876	62500769	-	715	protein_coding	cuticular protein 19	Chitin_bind_4
100160599	56.63082864	56.01179798	55.59925657	78.60198236	78.28698142	81.48270325	0.509314337	3.85E-19	7.98E-18	LOC100160599	NC_042495.1	72107919	72113759	+	2090	protein_coding	amidophosphoribosyltransferase%2C transcript variant X1	Pribosyltran
100160427	65.53833149	65.27888098	60.01904051	69.66525944	78.14453026	74.23548323	0.224878365	0.001273219	0.004852071	LOC100160427	NC_042494.1	62774116	62785536	+	1647	protein_coding	pantothenate kinase 3	Fumble
100161869	58.01031781	44.41838656	51.45481344	87.84677442	78.07116669	83.4116911	0.702480569	6.96E-15	1.06E-13	LOC100161869	NC_042494.1	53730473	53744360	+	3012	protein_coding	protein yellow%2C transcript variant X1	-
100159217	84.93875326	89.11826178	90.83674601	75.56762012	77.97100699	78.24862975	-0.185536474	0.001262867	0.004816112	LOC100159217	NC_042495.1	76387743	76390538	-	1965	protein_coding	signal recognition particle 54 kDa protein	-
100574328	22.43824016	27.94086371	26.05248975	110.1191188	77.79351221	101.8344721	1.930673714	5.10E-54	4.76E-52	LOC100574328	NC_042493.1	88306300	88308107	-	706	protein_coding	uncharacterized LOC100574328	-
100162998	242.2350788	165.0122998	213.7031116	85.45477456	77.59591983	72.99513763	-1.389187353	2.30E-33	9.74E-32	cp37	NC_042494.1	62326451	62327328	+	739	protein_coding	cuticular protein 37	Chitin_bind_4
100167306	103.086262	85.51953045	95.84049919	85.20553448	77.36330324	83.77056845	-0.20107171	0.009734676	0.029065857	LOC100167306	NC_042495.1	79280724	79284992	-	2233	protein_coding	RR1 cuticle protein 6	Chitin_bind_4
100164792	54.61985848	55.76183671	56.61364279	75.87202685	77.31842073	72.73478018	0.443107939	2.84E-14	4.13E-13	LOC100164792	NC_042494.1	44216622	44232853	-	2231	protein_coding	uncharacterized LOC100164792%2C transcript variant X2	-
100163677	87.02922295	97.0165127	89.94268429	83.70750226	77.28041968	81.86255882	-0.166959183	0.014738764	0.041523836	LOC100163677	NC_042494.1	53560760	53563432	+	1229	protein_coding	CDGSH iron-sulfur domain-containing protein-like	-
100575353	34.01943761	30.0349246	35.95154103	82.40331021	77.02939667	71.08447752	1.212334847	2.39E-35	1.11E-33	LOC100575353	NW_021763657.1	3291	4017	-	654	protein_coding	52 kDa repressor of the inhibitor of the protein kinase-like	THAP
100572651	50.141553	57.06937735	53.68152176	81.78349117	77.00432867	82.47576564	0.591792056	7.70E-17	1.38E-15	LOC100572651	NC_042495.1	8090104	8099956	+	1368	protein_coding	androgen-induced gene 1 protein	-
100167201	59.50149324	64.08027118	62.11075415	86.26477835	77.00092592	77.59083859	0.382554665	5.68E-07	3.85E-06	LOC100167201	NC_042495.1	68610422	68611430	-	876	protein_coding	brain protein 44-like	-
100166022	88.62970463	92.16189571	89.34041733	77.54841081	76.81112784	75.08869984	-0.228551017	7.56E-05	0.000374455	LOC100166022	NC_042494.1	93278058	93287670	+	1539	protein_coding	serine/arginine-rich splicing factor 1-like%2C transcript variant X1	RRM_1
100167575	71.40815445	70.15251659	69.22720585	79.70980919	76.74728444	80.12559637	0.173219725	0.001552532	0.005802337	LOC100167575	NC_042494.1	107462353	107468703	+	2759	protein_coding	peroxisomal multifunctional enzyme type 2%2C transcript variant X2	adh_short
100573761	93.27549004	85.59538165	88.18644585	76.89821747	76.67632133	74.29770612	-0.22243535	0.00098197	0.003845257	LOC100573761	NC_042493.1	56682937	56690405	+	1011	protein_coding	ethylmalonyl-CoA decarboxylase-like	-
100162988	47.75023888	42.95975228	43.01828878	61.40125261	76.33806422	68.11060362	0.628572905	2.29E-14	3.35E-13	LOC100162988	NC_042494.1	90387706	90428522	+	3688	protein_coding	phosphatidate phosphatase LPIN3%2C transcript variant X1	-
100165061	135.7267268	129.0769178	128.831704	76.33842635	76.14592328	77.64053706	-0.767918542	4.35E-39	2.48E-37	Cpap3-a2	NC_042494.1	84305469	84315364	-	1389	protein_coding	cuticular protein analogous to peritrophins 3-A2%2C transcript variant X1	CBM_14
100162539	87.25279469	87.58066586	90.64274047	79.20101563	76.13575986	77.14948576	-0.184488067	0.000429837	0.001835041	LOC100162539	NC_042494.1	140393685	140426606	+	3719	protein_coding	PDZ and LIM domain protein Zasp%2C transcript variant X8	PDZ
100166627	61.34141808	63.64901959	64.47713639	75.62880339	75.95150298	75.94659611	0.271210197	3.79E-06	2.29E-05	LOC100166627	NC_042494.1	8412398	8414256	+	1661	protein_coding	FUN14 domain-containing protein 1-like	-
100162256	69.22841383	68.89830283	65.23646104	75.02508176	75.89691158	74.13427609	0.152909371	0.003725898	0.012582084	LOC100162256	NC_042495.1	63875556	63973831	-	5225	protein_coding	monocarboxylate transporter 1%2C transcript variant X2	MFS_1
100575791	94.96698505	103.7487697	99.15899314	90.58384375	75.76452161	86.13312504	-0.231400616	0.00338822	0.011575562	LOC100575791	NC_042494.1	89960795	89967748	-	1017	protein_coding	transformer-2 protein homolog alpha	RRM_1
100167919	44.64978652	49.70744337	47.24697342	63.11446082	75.738934	68.08002722	0.554489758	2.93E-10	2.95E-09	LOC100167919	NC_042495.1	117730383	117731287	+	839	protein_coding	uncharacterized LOC100167919	-
100163339	49.53065809	52.36677343	48.71158523	72.5602188	75.36568004	75.55293013	0.575992825	9.14E-19	1.86E-17	LOC100163339	NC_042495.1	87815355	87821111	-	1369	protein_coding	glutaryl-Coenzyme A dehydrogenase-like	-
100302490	86.69716426	85.75237521	89.09179646	74.08009225	75.13460718	72.74905245	-0.22973469	0.00010752	0.000516705	NV7	NC_042494.1	70538814	70547452	-	1406	lncRNA	uncharacterized LOC100302490	-
100161679	129.3839421	108.0585755	87.90321429	73.59121939	74.89500382	73.98756824	-0.542305698	3.97E-07	2.74E-06	LOC100161679	NC_042496.1	21847660	21868056	+	1609	protein_coding	alpha-N-acetylgalactosaminidase	-
100168394	86.75740098	80.34059268	83.9396595	74.08445982	74.45686717	73.64167788	-0.169519619	0.002021299	0.007329358	LOC100168394	NC_042495.1	73623139	73638540	-	4322	protein_coding	protein lingerer%2C transcript variant X3	-
100574413	16.69616076	21.96935852	23.28717917	91.3805335	74.38819658	77.46932835	1.982960642	1.27E-61	1.53E-59	LOC100574413	NC_042493.1	88300131	88303308	-	784	protein_coding	uncharacterized LOC100574413	-
100164501	84.49055419	82.28621447	82.92683117	72.7018303	74.27361258	70.40130492	-0.193257951	0.000438369	0.001867102	LOC100164501	NC_042494.1	140033963	140135673	+	2637	protein_coding	amyloid-beta-like protein	-
100161615	48.37781108	42.25519568	42.94192189	79.69053359	74.03145649	75.27997768	0.784007288	1.57E-28	5.38E-27	LOC100161615	NC_042494.1	131929446	131947254	-	2878	protein_coding	inter-alpha (globulin) inhibitor H4-like%2C transcript variant X2	VWA
100144899	85.08420862	85.50329237	85.53640875	74.1770296	74.02422872	76.25462364	-0.183619035	0.000715138	0.002896723	Got2	NC_042495.1	67848344	67851703	+	2091	protein_coding	glutamate oxaloacetate transaminase 2	Aminotran_1_2
100165962	28.37877577	21.40670425	23.86630081	69.99437455	74.00381401	71.18015541	1.552374431	5.44E-64	6.87E-62	LOC100165962	NC_042495.1	51270292	51278453	+	2219	protein_coding	glucose dehydrogenase [FAD%2C quinone]%2C transcript variant X1	-
100167498	84.59867818	85.98776794	86.60615137	69.09659977	73.78819861	72.31152058	-0.250358767	2.30E-06	1.44E-05	LOC100167498	NC_042494.1	114546766	114585386	-	3930	protein_coding	protein argonaute-2%2C transcript variant X2	Piwi
100158856	85.34829574	88.19368674	84.98209555	76.37063205	73.67941242	75.58309382	-0.189472291	0.000524727	0.002200007	LOC100158856	NC_042493.1	89718023	89726476	+	2336	protein_coding	protein ERGIC-53	-
100165780	63.31516112	67.10849556	66.22320464	72.99905821	73.67293573	72.05258943	0.160677264	0.010493684	0.031020957	LOC100165780	NC_042495.1	78207632	78210263	-	1269	protein_coding	UMP-CMP kinase%2C transcript variant X2	ADK
100572767	85.6483331	85.83494814	89.59604441	75.65951081	73.52587097	77.93099438	-0.194124688	0.000782039	0.003134713	LOC100572767	NC_042495.1	16384488	16387165	-	2063	lncRNA	uncharacterized LOC100572767	-
100164514	83.16666795	86.16514343	83.37228961	74.84722815	73.19765117	76.64427083	-0.162680777	0.002349511	0.008363772	LOC100164514	NC_042494.1	112065138	112071152	+	2981	protein_coding	pre-mRNA-processing factor 19	WD40
100572479	107.8608384	146.3266734	127.4443551	107.5846016	73.1949394	85.56946311	-0.511096255	0.012569721	0.036301023	LOC100572479	NC_042494.1	43208083	43209857	+	867	protein_coding	uncharacterized LOC100572479	-
100168905	78.64436458	89.13970419	84.44335605	78.88974345	73.03170367	73.39624508	-0.155527471	0.01730168	0.047713443	LOC100168905	NC_042495.1	81623266	81629709	+	2911	protein_coding	lysine--tRNA ligase%2C transcript variant X1	tRNA-synt_2
100166715	83.93034537	97.52083582	94.45995659	81.79021291	72.78831937	80.08544816	-0.226177495	0.003979212	0.013329093	LOC100166715	NC_042495.1	88235442	88238225	-	1058	protein_coding	ribosome biogenesis protein BRX1 homolog	-
100165821	85.85944915	97.132556	88.01744744	78.69712339	72.77514766	79.39340317	-0.224277793	0.002356331	0.008384264	LOC100165821	NC_042494.1	68092262	68093854	-	1015	protein_coding	proteasome subunit N3-like	Proteasome
100159311	81.76353245	93.81559131	87.70543256	72.56250801	72.71414765	74.96604557	-0.250316957	0.0004091	0.001752476	LOC100159311	NC_042495.1	84442268	84444014	+	1062	protein_coding	F-actin-capping protein subunit beta	-
100160301	47.67387546	56.70174589	55.92589333	71.84475634	72.64960112	74.13527411	0.45553111	1.47E-08	1.22E-07	LOC100160301	NC_042494.1	55943463	55947331	-	1015	protein_coding	uncharacterized protein LOC100160301	-
100162135	138.8063395	115.6372062	128.2615926	69.13750321	72.56766439	72.03488368	-0.83403043	2.13E-29	7.59E-28	LOC100162135	NC_042495.1	111990941	112001572	-	2020	protein_coding	regucalcin-like%2C transcript variant X2	-
100573960	68.51336621	69.49533773	65.48211869	76.43726478	72.46444943	84.21571375	0.202524231	0.006912528	0.02171111	LOC100573960	NW_021773167.1	3037	5060	+	1136	misc_RNA	uncharacterized LOC100573960	-
100168430	18.08472202	19.52487089	19.19089566	72.49889193	72.31834617	71.70012522	1.938017619	1.28E-177	1.55E-174	LOC100168430	NC_042495.1	47508802	47517768	+	1728	protein_coding	venom protease	Trypsin
100159461	48.85182625	49.6739276	48.36848948	73.57286052	72.24340689	71.97267403	0.574956187	1.79E-26	5.56E-25	LOC100159461	NC_042494.1	39981149	40056956	+	2941	protein_coding	MFS-type transporter SLC18B1	MFS_1
100167007	119.8005296	122.9673671	119.738783	59.73347735	72.15804509	64.32856531	-0.878775771	2.74E-34	1.21E-32	LOC100167007	NC_042494.1	149441045	149479617	-	2118	protein_coding	decaprenyl-diphosphate synthase subunit 1	-
100573582	57.61999574	60.15137532	56.5206909	71.45049728	72.063502	73.53401575	0.323162647	3.11E-07	2.17E-06	LOC100573582	NC_042496.1	11963231	11982636	-	1361	protein_coding	aquaporin AQPAe.a-like%2C transcript variant X1	-
100168586	61.61174753	68.29933783	66.14075335	76.46367508	71.9695982	78.73868326	0.21977975	0.002500406	0.008839101	Blvrb	NC_042494.1	15148882	15150228	-	1024	protein_coding	biliverdin reductase B (flavin reductase (NADPH))	-
100162798	41.29833463	49.12031795	45.62213385	66.12668533	71.95966612	65.83114	0.591311764	3.52E-15	5.52E-14	LOC100162798	NC_042495.1	4589093	4604924	+	2272	protein_coding	high affinity cationic amino acid transporter 1	-
100572394	26.496202	31.42793612	33.07657738	68.09341411	71.86498522	84.05525928	1.307227283	4.87E-43	3.19E-41	LOC100572394	NC_042494.1	10107418	10116808	-	2301	protein_coding	histidine-rich glycoprotein%2C transcript variant X1	-
100161367	88.73976415	101.1290469	96.59475991	81.01739091	71.71797031	75.11517019	-0.322898312	1.65E-05	9.14E-05	LOC100161367	NC_042494.1	16638238	16642570	+	1165	protein_coding	probable ubiquitin-conjugating enzyme E2 C%2C transcript variant X1	UQ_con
100167585	28.39220423	32.06130097	29.38761747	76.56633422	71.62543908	75.88688748	1.325679872	7.56E-91	1.75E-88	LOC100167585	NC_042494.1	162341272	162351802	+	3356	protein_coding	uncharacterized LOC100167585%2C transcript variant X2	Trypsin
100166473	55.45567817	61.5036724	57.87203825	84.16121058	71.5952074	75.91827104	0.413375705	9.17E-08	6.93E-07	LOC100166473	NC_042495.1	5669997	5685127	-	1485	protein_coding	cysteine dioxygenase-like	-
100168024	85.15178731	88.4280785	83.42830245	73.4435146	71.45627486	76.41471849	-0.209078309	0.001193751	0.004588015	LOC100168024	NC_042495.1	97975822	97983028	+	1155	protein_coding	uncharacterized LOC100168024	-
100168412	16.96900814	17.45771651	18.04222215	84.34697775	71.24705642	79.047211	2.16865588	2.48E-103	8.68E-101	LOC100168412	NC_042494.1	114637584	114639554	+	688	protein_coding	ejaculatory bulb-specific protein 3-like	-
100168697	83.62818451	86.44347188	83.85555964	74.21240217	70.61298963	73.32413641	-0.212234643	0.000264591	0.001172929	LOC100168697	NC_042495.1	68776361	68782781	+	1718	protein_coding	transcription initiation factor IIA subunit 1	-
100159906	75.79360668	88.79798212	83.02591406	74.25602706	70.57103498	70.45985822	-0.194529709	0.0048416	0.015877348	LOC100159906	NC_042495.1	37046190	37052073	-	2283	protein_coding	probable 28S rRNA (cytosine(4447)-C(5))-methyltransferase	-
100160659	60.85350939	55.64709766	56.86012441	72.47017141	70.4912712	69.74727287	0.301647132	3.42E-07	2.38E-06	LOC100160659	NC_042494.1	52801222	52822395	+	4065	protein_coding	ATP-dependent 6-phosphofructokinase%2C transcript variant X1	PFK
100166922	82.84489474	105.651514	98.24218976	60.408413	70.34015004	66.68823942	-0.530986162	3.59E-09	3.21E-08	Mf-cpa	NC_042494.1	90216090	90218695	-	1590	protein_coding	molting fluid carboxypeptidase A	-
100165584	42.82972051	46.03728589	42.69201631	48.87272408	70.21734419	55.47434313	0.414741998	7.53E-05	0.000373122	LOC100165584	NC_042495.1	71540760	71545771	+	2724	protein_coding	MAP kinase-interacting serine/threonine-protein kinase 1	Pkinase
100144782	48.5561559	41.61668429	44.95314424	82.19300792	70.03863265	75.36054538	0.7585358	2.26E-19	4.74E-18	Catb-1418	NC_042495.1	49707899	49716066	-	1424	protein_coding	cathepsin B-1418	Peptidase_C1
100165477	61.27661472	64.36798629	60.57671382	70.3683445	69.95286132	69.23608841	0.177143234	0.003012847	0.010426801	Jhbp	NC_042494.1	167020893	167033679	-	1750	protein_coding	juvenile hormone binding protein%2C transcript variant X3	-
100165203	52.51948609	51.01161666	51.18864919	62.46274126	69.89902884	67.86031375	0.37853887	6.82E-10	6.59E-09	LOC100165203	NC_042495.1	48977247	48993761	+	3764	protein_coding	alpha%2Calpha-trehalose-phosphate synthase [UDP-forming]%2C transcript variant X2	-
100161133	51.47240005	46.05014014	49.55160445	64.86002001	69.89121097	65.44391844	0.451380565	6.69E-12	7.90E-11	LOC100161133	NC_042494.1	111980510	111991986	-	3167	lncRNA	uncharacterized LOC100161133%2C transcript variant X1	-
100165834	58.96301819	64.11761632	66.39480971	76.71593821	69.88287851	72.30187664	0.216073356	0.008387918	0.025641577	LOC100165834	NC_042495.1	12319941	12322631	+	668	protein_coding	mitochondrial import inner membrane translocase subunit TIM16-like	-
100164349	83.14394092	89.48014812	86.10295476	72.22087008	69.81756383	75.13359658	-0.245632114	6.05E-05	0.000305367	LOC100164349	NC_042495.1	92274089	92276102	+	1841	protein_coding	small ubiquitin-related modifier	-
100167521	53.05790277	64.29606532	62.85550899	68.38624233	69.79111833	74.68597169	0.247883775	0.003160239	0.010876764	LOC100167521	NC_042496.1	21629138	21631534	-	1115	protein_coding	probable ribosome production factor 1	-
100160318	81.12238443	84.79163523	80.39951145	72.49857403	69.65503113	73.13857832	-0.187358848	0.000683977	0.00278193	LOC100160318	NC_042495.1	89149674	89155194	-	3107	protein_coding	coatomer subunit gamma-2%2C transcript variant X2	-
100168153	164.0320217	151.9039718	159.3775653	31.71180577	69.63783895	50.46878502	-1.64045729	1.52E-07	1.11E-06	LOC100168153	NC_042494.1	27091371	27102875	+	1359	protein_coding	clavesin-1	-
100167151	81.61218907	78.58515278	79.23151306	72.25674433	69.61075769	71.73922389	-0.157955177	0.003396972	0.011602951	LOC100167151	NC_042496.1	14976266	14987179	-	3242	protein_coding	cleavage and polyadenylation specificity factor subunit CG7185%2C transcript variant X1	RRM_1
100144896	82.36898123	87.43360067	87.09916922	75.74654297	69.59312631	72.96671907	-0.227657312	0.000986859	0.003862483	E(r)	NC_042494.1	16609726	16610882	+	943	protein_coding	enhancer of rudimentary	-
100167298	82.31109655	89.94054423	86.97984582	73.80562009	69.33242446	75.11569725	-0.241121033	0.000759214	0.003049417	Pdcd5	NC_042494.1	61192285	61193419	-	862	protein_coding	programmed cell death 5	-
100161329	63.22701047	58.83875126	59.43152171	64.59750713	69.08563968	67.02836655	0.151636528	0.012125303	0.035204436	LOC100161329	NC_042496.1	33695299	33725266	-	2950	protein_coding	monocarboxylate transporter 9%2C transcript variant X2	MFS_1
100165102	62.56816444	65.58059334	63.25370399	79.3928659	69.08243994	72.48240595	0.214190704	0.001380773	0.005219084	LOC100165102	NC_042494.1	87919284	87928653	-	2655	protein_coding	methylthioribose-1-phosphate isomerase	-
100574005	4.429146906	3.818021724	5.636300918	83.63651577	68.89980675	75.27256664	4.050182079	2.29E-130	1.39E-127	LOC100574005	NC_042494.1	165457925	165458503	+	426	protein_coding	28 kDa heat- and acid-stable phosphoprotein-like	-
100168160	75.8286262	76.21020331	75.33456866	69.23936033	68.77252182	67.24741233	-0.140781668	0.010118026	0.030040461	LOC100168160	NC_042494.1	114085205	114088428	-	2213	protein_coding	minor histocompatibility antigen H13	-
103309664	19.9879161	16.53459217	18.08433238	75.31641797	68.05480778	67.73322696	1.956691875	5.21E-110	2.11E-107	LOC103309664	NC_042496.1	37283909	37287210	-	1473	protein_coding	uncharacterized LOC103309664	-
100569501	50.98841107	56.38704397	59.89510702	73.83287332	68.03677129	72.19083892	0.363810258	1.19E-05	6.75E-05	LOC100569501	NC_042494.1	58319127	58319927	+	801	protein_coding	protein canopy-1-like	-
100164026	96.03041267	116.3642165	107.1312294	38.34965766	67.9687401	54.95697519	-0.979669159	4.75E-05	0.00024464	LOC100164026	NC_042496.1	8313817	8337637	-	2736	protein_coding	nose resistant to fluoxetine protein 6	-
100168251	81.17833165	78.63412857	80.93082339	61.56996563	67.80860569	64.34177966	-0.306812484	2.92E-07	2.04E-06	LOC100168251	NC_042494.1	144950686	144971699	+	2594	protein_coding	proton-coupled amino acid transporter-like protein CG1139	Aa_trans
100167917	82.6425663	96.42090801	92.34583485	73.52833668	67.75864249	75.68837769	-0.315625835	3.86E-05	0.000201086	rrs1	NC_042495.1	74347378	74352791	+	1250	protein_coding	RRS1 ribosome biogenesis regulator homolog	-
100169502	59.83128218	56.63192479	58.97135189	66.29646547	67.72370593	69.74822065	0.222598924	0.000235268	0.001053298	MSBP	NC_042493.1	74797676	74807452	-	1992	protein_coding	membrane steroid binding protein%2C transcript variant X1	-
100159766	45.5930062	50.11704977	40.15059968	67.07192455	67.67996054	60.05616871	0.526294026	1.55E-08	1.28E-07	LOC100159766	NC_042495.1	86626576	86631813	-	932	protein_coding	thioredoxin%2C mitochondrial-like	-
100169082	112.9454819	135.7239786	132.7533991	22.81027601	67.4993831	44.79766873	-1.490916679	0.00037673	0.00162041	LOC100169082	NC_042495.1	47297287	47302855	-	1981	protein_coding	glycine-rich cell wall structural protein	-
100161977	78.68705383	89.9161821	88.83905377	73.08311977	67.48052632	70.0714039	-0.282000155	0.000141522	0.000664128	LOC100161977	NC_042493.1	87441666	87448300	+	1128	protein_coding	maintenance of killer 16 protein-like	-
100159742	57.13653667	57.48514427	59.72596061	70.23700991	67.38836908	68.24985006	0.246872923	2.08E-05	0.000113152	LOC100159742	NC_042493.1	4534693	4541478	+	2249	protein_coding	uncharacterized LOC100159742	Zona_pellucida
100166314	116.8270841	87.25442839	99.44760694	61.96275165	67.35735298	63.42223918	-0.649032475	1.35E-12	1.70E-11	LOC100166314	NC_042495.1	8150326	8199142	+	3720	protein_coding	uncharacterized LOC100166314%2C transcript variant X1	CBM_14
100168607	8.97235376	12.11041071	9.540613171	44.20452697	67.25690211	59.05032203	2.484227501	7.39E-72	1.13E-69	LOC100168607	NC_042495.1	71637773	71640657	+	1529	protein_coding	acyl-CoA Delta(11) desaturase	-
100165452	115.5341077	98.80317396	105.1414619	53.8922906	67.21275487	61.27574561	-0.802468177	2.42E-21	5.78E-20	LOC100165452	NC_042496.1	8209807	8242369	+	3977	protein_coding	probable chitinase 10	CBM_14
100162684	59.61407408	52.49607151	56.46031794	63.11338653	67.21210368	66.95523039	0.233264345	0.000727686	0.002937746	LOC100162684	NC_042495.1	42802865	42810184	-	2083	protein_coding	cyclin-L1	-
100165247	55.24683304	48.8330958	51.11279353	65.97349933	66.83491119	63.28724825	0.343996202	5.72E-08	4.43E-07	LOC100165247	NC_042494.1	136040347	136108177	-	5786	protein_coding	ABC transporter G family member 20%2C transcript variant X3	ABC2_membrane
100162023	76.80010004	80.84334094	77.34714553	69.55820215	66.7963878	69.09434585	-0.18691322	0.000722844	0.002921935	LOC100162023	NC_042494.1	109472915	109480923	+	2812	protein_coding	histone deacetylase Rpd3	Hist_deacetyl
100160149	41.83909319	45.40750125	51.08540234	68.38509554	66.70850448	68.73124803	0.567424633	2.75E-11	3.06E-10	LOC100160149	NC_042494.1	121275037	121280554	-	901	protein_coding	acyl-CoA-binding protein homolog	-
100162864	88.69983108	87.38177034	87.11271988	62.53522781	66.66633749	68.08007057	-0.409249765	2.11E-12	2.60E-11	LOC100162864	NC_042495.1	16043935	16071338	-	2425	protein_coding	putative inorganic phosphate cotransporter%2C transcript variant X2	MFS_1
100166722	7.806710487	10.28931031	9.235014717	78.84365324	66.63211747	66.6821234	2.965609509	1.72E-159	1.69E-156	LOC100166722	NC_042494.1	10100008	10104333	-	1143	protein_coding	histidine-rich glycoprotein-like	-
100159688	81.75526722	97.04067264	93.68504721	65.408381	66.44125446	65.56640871	-0.4573448	4.79E-09	4.20E-08	LOC100159688	NC_042494.1	141126709	141129830	+	927	protein_coding	uncharacterized LOC100159688	-
100165230	16.87571035	14.76697896	16.04117476	75.07312182	66.27668911	70.50898502	2.157816486	6.72E-147	4.82E-144	LOC100165230	NC_042495.1	49876232	49882374	+	1542	protein_coding	uncharacterized LOC100165230%2C transcript variant X1	-
100166313	58.66121229	55.50586103	56.34847877	60.30714839	66.0776401	65.50460281	0.176881743	0.004116587	0.013725147	LOC100166313	NC_042495.1	18920838	18934775	-	3191	protein_coding	uncharacterized LOC100166313%2C transcript variant X4	Ribonuclease_T2
100161074	72.43575084	84.82646794	78.15828246	69.38733587	66.01487117	68.3462156	-0.201176169	0.004341717	0.014390601	LOC100161074	NC_042495.1	65531973	65534779	-	1736	protein_coding	glutamate-rich WD repeat-containing protein 1	WD40
100163171	43.91802524	45.36083386	45.30309795	57.07211491	65.93761908	65.06150421	0.489621142	1.55E-11	1.76E-10	LOC100163171	NC_042495.1	57608842	57612134	-	1825	protein_coding	senecionine N-oxygenase	FMO-like
100163888	78.41294428	88.70077431	81.96020684	75.08792894	65.84643206	74.54456587	-0.201903993	0.006263108	0.019901925	LOC100163888	NC_042494.1	123056330	123062034	+	1923	protein_coding	tyrosine--tRNA ligase%2C cytoplasmic	-
100160034	50.77565763	51.55627262	51.08494398	55.64135572	65.62572885	63.02312468	0.271222372	0.000130802	0.000618232	LOC100160034	NC_042493.1	88792235	88797800	-	2523	protein_coding	phenoloxidase 1	-
100160579	72.92994984	76.61471104	73.17381685	65.42789636	65.57672365	66.38358855	-0.167323633	0.002265502	0.008106786	LOC100160579	NC_042494.1	43184176	43189325	+	2578	protein_coding	histone-binding protein RBBP4	WD40
100144796	39.30867879	39.6118438	39.03535751	73.8383722	65.46569878	69.14909308	0.828313562	9.87E-31	3.74E-29	Catb-10270	NC_042495.1	59009048	59012545	-	1395	protein_coding	cathepsin B-10270	Peptidase_C1
100162422	85.44500332	95.29453365	103.8991791	78.21569461	65.32654662	69.47108728	-0.410267952	1.94E-05	0.000106236	LOC100162422	NC_042494.1	112060980	112061864	+	593	protein_coding	small nuclear ribonucleoprotein F	-
100162409	76.02842156	79.92989632	83.24630731	64.16840523	64.95046954	64.34554995	-0.298761245	1.71E-05	9.50E-05	LOC100162409	NC_042493.1	88464979	88473512	+	911	protein_coding	uncharacterized LOC100162409%2C transcript variant X1	-
100168676	183.7695467	167.7248005	176.1523006	27.02837496	64.92484953	44.70259915	-1.943044882	2.31E-08	1.88E-07	LOC100168676	NC_042494.1	43914313	43928388	-	2668	protein_coding	myb-like protein Q	CBM_14
100160983	75.45044335	73.36573145	72.77272115	63.675	64.89683975	61.2067927	-0.216829947	3.46E-05	0.00018262	LOC100160983	NC_042494.1	55962076	55976351	-	6864	protein_coding	chromodomain-helicase-DNA-binding protein Mi-2 homolog%2C transcript variant X2	SNF2_N
100165432	76.4184605	81.0473685	80.96990158	71.45987248	64.85892352	69.39002932	-0.205849417	0.001878075	0.006868427	LOC100165432	NC_042494.1	7817443	7850210	+	1448	protein_coding	nuclear migration protein nudC	-
100168494	71.8886054	76.24200308	74.45279087	67.29563496	64.72074498	66.72817978	-0.156385974	0.010889356	0.032040538	LOC100168494	NC_042495.1	63405926	63412254	+	1478	protein_coding	SAP domain-containing ribonucleoprotein	SAP
100165533	59.70212996	55.40335178	58.16736981	65.95293185	64.61134623	65.7718864	0.186849373	0.004813675	0.015789056	LOC100165533	NC_042493.1	35061960	35075769	-	1303	protein_coding	sodium/potassium-transporting ATPase subunit beta-2	-
100158888	64.62613293	55.79118911	54.2979019	76.4024319	64.38338957	70.75347	0.281777164	0.002751941	0.009614122	cprr1-4	NC_042494.1	164805391	164807383	-	826	protein_coding	RR1 cuticle protein 4	Chitin_bind_4
100161644	50.55636354	51.06830242	50.96598519	71.81544356	64.09232972	68.9309497	0.431727398	1.29E-10	1.34E-09	LOC100161644	NC_042496.1	2453972	2460707	+	1688	protein_coding	UDP-glucose 4-epimerase-like%2C transcript variant X1	-
100165185	62.80631723	72.33777203	76.98162559	57.85222637	64.08286213	61.43927067	-0.202621431	0.013075362	0.037514092	LOC100165185	NC_042494.1	72018167	72066388	-	1616	protein_coding	CD63 antigen	Tetraspannin
100169409	111.60977	118.9827104	113.4771616	41.23516938	64.04161488	51.27019388	-1.129457796	3.22E-23	8.58E-22	LOC100169409	NC_042495.1	105403165	105405067	-	1755	protein_coding	uncharacterized LOC100169409	-
100160399	72.61654728	76.70870281	73.71790552	68.99357537	63.96987715	65.92159198	-0.158394476	0.010700461	0.031567161	LOC100160399	NC_042496.1	40761939	40767362	+	1749	protein_coding	rab6-like%2C transcript variant X1	Ras
100160481	74.1422157	74.97193972	73.99041351	64.39834502	63.89784799	62.1304273	-0.22162098	6.33E-06	3.72E-05	LOC100160481	NC_042494.1	155064806	155122162	-	6500	protein_coding	laminin subunit gamma-1%2C transcript variant X1	Laminin_EGF
100166201	37.1769717	38.26686015	37.58879602	65.43913412	63.85308208	69.03150203	0.817888213	3.91E-27	1.24E-25	Glrx5	NC_042494.1	122968165	122969754	+	922	protein_coding	glutaredoxin 5	-
100162351	45.68348039	46.21895449	45.66236121	65.98399108	63.78224162	63.39789552	0.496585543	2.87E-18	5.61E-17	LOC100162351	NC_042494.1	116513017	116522675	+	2522	protein_coding	uncharacterized LOC100162351%2C transcript variant X1	-
100167473	32.30428129	28.2290921	29.01809267	65.21592844	63.76028526	66.07209511	1.129267712	4.67E-64	5.94E-62	LOC100167473	NC_042494.1	129254805	129265109	-	4209	protein_coding	uncharacterized LOC100167473	COesterase
100163192	89.90549153	103.4399896	93.25415333	61.42911142	63.68788556	70.50465988	-0.544120421	4.94E-11	5.33E-10	Nop16	NC_042494.1	4742139	4745581	+	787	protein_coding	NOP16 nucleolar protein homolog	-
100166548	71.22638445	72.90054355	69.83730261	64.24464781	63.65891477	66.62073192	-0.130663338	0.013614262	0.038834244	LOC100166548	NC_042495.1	13325355	13331014	+	4175	protein_coding	coatomer subunit alpha%2C transcript variant X1	Coatomer_WDAD
103307689	47.58419012	48.21866746	49.45652288	58.67982093	63.60669729	58.26076935	0.321029699	0.00018746	0.000856269	LOC103307689	NC_042495.1	48538667	48541169	-	589	lncRNA	uncharacterized LOC103307689	-
100169239	42.41288347	46.60885628	45.10866405	63.98615819	63.44141756	65.61219251	0.532536894	4.31E-14	6.21E-13	LOC100169239	NC_042496.1	9689038	9690285	+	1165	protein_coding	tubulin-folding cofactor B-like%2C transcript variant X1	-
100164389	40.03202462	34.38103393	35.65653923	75.69263453	63.40221572	68.99035355	0.925027463	3.29E-27	1.05E-25	LOC100164389	NC_042494.1	64606209	64615233	+	1902	protein_coding	neurogenic locus notch homolog protein 1	-
100165005	79.22585107	73.68233335	80.0869007	56.71672452	63.34227036	61.04033577	-0.356813399	1.94E-06	1.23E-05	LOC100165005	NC_042494.1	127911449	127913939	+	969	protein_coding	uncharacterized LOC100165005	-
100168286	103.4689821	79.79169073	91.93196543	64.42633051	63.2277295	63.09702165	-0.522467983	5.99E-10	5.81E-09	LOC100168286	NC_042495.1	54503639	54513301	+	3793	protein_coding	collagen alpha-1(III) chain	CBM_14
100159010	47.46877751	47.82236047	44.913913	57.87964155	63.04049386	57.12480255	0.351417773	3.61E-09	3.23E-08	LOC100159010	NC_042494.1	109057025	109079391	+	9196	protein_coding	apolipophorins	VWD
100164485	50.55881732	52.08106672	50.01511289	64.77316316	63.02184819	63.16270254	0.329802281	2.49E-09	2.27E-08	LOC100164485	NC_042495.1	92951768	92994484	+	2942	protein_coding	solute carrier family 22 member 21%2C transcript variant X1	MFS_1
100162548	76.04692044	79.12990201	79.11848855	70.26675352	63.00037941	65.11320013	-0.233014825	0.000100096	0.00048353	LOC100162548	NC_042494.1	45203961	45216956	-	4756	protein_coding	splicing factor 3B subunit 3%2C transcript variant X1	-
100144783	53.03326649	52.9103562	52.56935038	66.45814113	62.95909987	63.26086018	0.288414666	1.70E-06	1.08E-05	Cpvl	NC_042495.1	5160310	5163333	+	1939	protein_coding	carboxypeptidase%2C vitellogenic-like	Peptidase_S10
100168185	44.58142148	49.45523414	46.87074014	55.82556923	62.92215192	59.71311341	0.347896938	3.99E-07	2.75E-06	Ance-like	NC_042494.1	56342634	56354623	+	2572	protein_coding	angiotensin converting enzyme-like%2C transcript variant X1	Peptidase_M2
100169258	75.99468505	70.7627657	69.73744961	57.14289199	62.73908153	60.17855725	-0.259454139	6.44E-05	0.000323355	LOC100169258	NC_042495.1	65565330	65579323	-	2503	protein_coding	organic cation transporter protein%2C transcript variant X1	Sugar_tr
100161931	69.51671016	75.08440842	72.2910524	66.06324034	62.67361723	64.22181467	-0.161607678	0.005940119	0.01902619	LOC100161931	NC_042494.1	28478822	28481391	+	2570	protein_coding	probable splicing factor%2C arginine/serine-rich 7	RRM_1
100159791	23.89819136	31.85529347	27.9093984	74.85903082	62.53974385	69.2861908	1.312699609	3.39E-38	1.81E-36	LOC100159791	NC_042494.1	92812486	92823056	+	1482	protein_coding	uncharacterized LOC100159791	-
100159359	69.88444509	68.34475325	66.55948696	60.94598262	62.46388065	60.34819227	-0.149630624	0.003361884	0.011498038	LOC100159359	NC_042495.1	115626130	115645999	-	7436	protein_coding	pre-mRNA-processing-splicing factor 8%2C transcript variant X1	Mov34
100168194	74.48977067	85.94341442	80.12049226	68.25618333	62.38629255	65.45166615	-0.28755721	3.59E-05	0.000188307	LOC100168194	NC_042494.1	62821592	62825311	-	2238	protein_coding	bifunctional purine biosynthesis protein PURH	-
100161583	56.16243181	53.45643274	54.42161287	61.07348917	62.31708029	60.00303704	0.16750041	0.007993557	0.024628517	LOC100161583	NC_042494.1	64627075	64631163	-	1565	protein_coding	aminomethyltransferase%2C mitochondrial	GCV_T
100167620	51.56570897	49.59263275	49.39432952	54.43034388	62.24774103	56.22605723	0.206305535	0.001330421	0.005050543	LOC100167620	NC_042494.1	145990678	146018249	+	5747	protein_coding	multidrug resistance-associated protein 1%2C transcript variant X2	ABC_membrane
100159762	56.38905853	53.16461299	50.75593108	58.56174946	62.15536082	58.89896677	0.17019391	0.016983484	0.046942613	LOC100159762	NC_042494.1	120222679	120229027	+	1321	protein_coding	ubiquitin-conjugating enyzme E2r-like	UQ_con
100167984	15.57324727	7.557288566	11.0660752	69.10036875	62.1456734	64.04007874	2.519062867	4.28E-17	7.80E-16	LOC100167984	NC_042494.1	155203478	155223031	-	3140	protein_coding	ABC transporter G family member 23%2C transcript variant X1	ABC_tran
100164970	56.64132433	59.32917449	55.77540266	64.48244092	62.07117532	67.6433951	0.183833753	0.011099883	0.032568879	LOC100164970	NC_042495.1	75697633	75700011	+	982	protein_coding	uncharacterized LOC100164970%2C transcript variant X1	-
100159351	47.48715316	50.89559474	48.21796955	60.63041323	62.05463275	60.80356009	0.330747499	4.25E-09	3.77E-08	LOC100159351	NC_042494.1	54630373	54640597	-	3326	protein_coding	plant intracellular Ras-group-related LRR protein 6	-
100168896	41.22371699	47.53248781	49.48492237	53.99351557	62.02670013	55.02121174	0.315273293	0.000869116	0.003447835	LOC100168896	NC_042494.1	26086910	26087954	+	780	protein_coding	28S ribosomal protein S14%2C mitochondrial%2C transcript variant X1	Ribosomal_S14
100159048	19.91557769	22.0913442	21.41182385	59.63408524	61.93809548	61.76421904	1.538912779	2.10E-121	1.07E-118	LOC100159048	NC_042494.1	162193791	162200980	-	2558	protein_coding	serine protease Hayan	Trypsin
100163556	71.97205086	77.79271858	82.94750598	62.23166364	61.82837622	65.59244865	-0.287579969	0.000373533	0.001608852	LOC100163556	NC_042494.1	98363968	98365734	-	698	protein_coding	small nuclear ribonucleoprotein D2-like	LSM
100158792	66.80045183	72.58008911	73.27618547	61.3994465	61.74532413	61.66180076	-0.195136132	0.003248186	0.01115755	LOC100158792	NC_042494.1	63572809	63576661	-	1294	protein_coding	aldo-keto reductase family 1 member B1%2C transcript variant X1	Aldo_ket_red
100158680	52.21667744	54.01549762	51.83420818	67.71487548	61.62506303	63.13319817	0.290985983	0.000121435	0.000577596	LOC100158680	NC_042495.1	69171691	69172843	-	874	protein_coding	MPV17 mitochondrial membrane protein-like	Mpv17_PMP22
115034951	14.82130512	18.00360139	15.43110986	63.03294021	61.50980352	50.37407791	1.86549952	1.08E-49	8.90E-48	LOC115034951	NW_021771166.1	89693	92623	+	549	protein_coding	uncharacterized LOC115034951	-
100166213	76.59011755	75.80260063	80.3488907	66.71493324	61.49754097	63.69226194	-0.271173047	0.000226727	0.001017661	LOC100166213	NC_042495.1	103997788	103999872	-	795	protein_coding	succinate dehydrogenase [ubiquinone] cytochrome b small subunit%2C mitochondrial-like	-
100163457	41.16028451	41.02825507	42.85428184	53.44414544	61.43524075	51.6687227	0.420643907	2.84E-07	1.99E-06	LOC100163457	NC_042495.1	50315116	50317499	+	1295	protein_coding	gamma-glutamylcysteine synthetase%2C putative	-
100167644	53.18667244	55.72353757	52.15173529	71.03594848	61.34176717	68.0041565	0.321895993	3.91E-05	0.000203663	LOC100167644	NC_042494.1	47816708	47819041	+	1065	protein_coding	enolase-phosphatase E1	-
100167363	75.40286283	68.17588779	72.29442967	63.25675556	61.29992613	64.13442528	-0.187628272	0.002751386	0.009614122	LOC100167363	NC_042494.1	97610843	97617439	+	2568	protein_coding	casein kinase I%2C transcript variant X3	Pkinase
100162027	82.31614471	98.49043834	88.09864434	66.44498625	61.28539959	64.12669301	-0.479703234	7.57E-08	5.75E-07	Nip7	NC_042494.1	134707342	134727851	-	542	protein_coding	60S ribosome subunit biogenesis protein NIP7 homolog	-
100161811	36.35977943	32.30275876	33.83068358	57.79738629	61.07828293	59.19064753	0.803162706	1.00E-32	4.11E-31	LOC100161811	NC_042494.1	50504088	50508664	+	2626	protein_coding	facilitated trehalose transporter Tret1	Sugar_tr
100162025	75.8302158	70.42392291	71.08671802	58.93046257	61.04395807	56.25309079	-0.295879856	3.31E-07	2.30E-06	LOC100162025	NC_042494.1	138665444	138717113	+	11029	protein_coding	uncharacterized LOC100162025	CUB
100572680	46.77637444	54.17882279	49.6979013	58.01968246	60.9849704	61.40098817	0.26721011	0.000395263	0.001696889	ACYPI35400	NC_042494.1	38214425	38218782	+	1237	protein_coding	uncharacterized FAM18-like protein CG5021-like%2C transcript variant X2	-
115034391	61.69596963	55.97645838	48.47167432	66.04735622	60.76167083	73.52465221	0.275723818	0.004932664	0.016155832	LOC115034391	NC_042496.1	9181196	9185832	-	1201	protein_coding	uncharacterized LOC115034391	-
100162501	52.45746627	55.58171407	54.95612232	61.75017882	60.67728805	60.32909892	0.172263423	0.005054762	0.016514595	LOC100162501	NC_042494.1	56642150	56644005	-	1713	protein_coding	transmembrane emp24 domain-containing protein 3	-
100162923	49.26955148	51.88243989	50.1570013	59.36015597	60.60859134	63.68575141	0.286317097	3.43E-05	0.000181235	LOC100162923	NC_042495.1	102664216	102665801	+	1176	protein_coding	anamorsin homolog	-
100574994	47.34984555	54.00791455	49.82191921	55.69056284	60.35767807	63.12249064	0.252081776	0.001465575	0.005509261	ACYPI56502	NC_042495.1	117736022	117737204	+	1183	protein_coding	uncharacterized LOC100574994	-
100165723	36.54993423	31.40946352	33.10732682	59.98184396	60.31852519	59.64669663	0.838453698	5.37E-33	2.24E-31	LOC100165723	NC_042494.1	49086079	49116415	-	2864	protein_coding	protein fem-1 homolog A	-
100166719	47.09878143	41.89454291	45.28245872	56.0051274	60.22192301	61.52938509	0.411086218	6.81E-09	5.88E-08	LOC100166719	NC_042495.1	103917483	103960545	-	2195	protein_coding	lysosome membrane protein 2	-
100575029	49.8144775	50.69619438	47.16585052	67.61463394	60.18821852	63.61516754	0.380934843	3.74E-08	2.95E-07	LOC100575029	NC_042493.1	87213099	87231599	-	1897	protein_coding	monoacylglycerol lipase ABHD12%2C transcript variant X2	-
100160172	68.7102922	71.33850622	71.9693117	59.25183581	60.15788994	60.96151101	-0.226084148	0.003380384	0.011556298	LOC100160172	NC_042494.1	166133939	166134553	+	615	protein_coding	clathrin coat assembly protein ap17-like	-
100165255	76.22787455	72.71515913	75.8283874	68.58926653	60.11454528	62.72471588	-0.224800477	0.000842029	0.003344839	LOC100165255	NC_042495.1	114566776	114574720	+	2336	protein_coding	aspartate aminotransferase%2C cytoplasmic%2C transcript variant X2	Aminotran_1_2
100164062	76.34460844	87.09938656	79.3772229	62.74948171	60.07371704	63.53335011	-0.374744799	2.52E-08	2.04E-07	LOC100164062	NC_042494.1	94661925	94667139	-	1989	protein_coding	asparagine--tRNA ligase%2C cytoplasmic	tRNA-synt_2
100162997	249.2021901	167.8509576	216.2047611	62.84715779	60.05827945	62.46821096	-1.76628711	3.03E-59	3.30E-57	cp5	NC_042494.1	62558549	62564344	+	1696	protein_coding	cuticular protein 5%2C transcript variant X1	Chitin_bind_4
100573359	71.3574772	80.13658022	72.70171795	61.65661993	59.99563062	65.50694403	-0.253616203	0.000672734	0.002742566	LOC100573359	NC_042495.1	16520106	16521311	+	1045	lncRNA	uncharacterized LOC100573359	-
100163247	36.60808254	41.87819333	38.51234905	49.87995928	59.89758029	56.04492297	0.510144056	1.51E-10	1.55E-09	LOC100163247	NC_042496.1	39484237	39519635	+	2882	protein_coding	lipase 3%2C transcript variant X1	-
100160507	69.77161914	72.13267571	70.94785204	60.53395706	59.81547362	56.97612545	-0.256436502	9.62E-06	5.52E-05	LOC100160507	NC_042495.1	37059548	37065284	+	2293	protein_coding	lamin Dm0	Filament
100159749	68.89937867	66.90104091	63.55017906	57.84107781	59.52620907	57.52346109	-0.182646363	0.017498437	0.048171844	LOC100159749	NC_042495.1	66554601	66558358	-	720	protein_coding	elongin C-like	Skp1_POZ
100165970	66.41388321	78.85477149	75.34025337	64.43715888	59.50697349	64.61293602	-0.218872453	0.012811633	0.03688488	Dnttip2	NC_042495.1	48258799	48260186	+	641	protein_coding	deoxynucleotidyltransferase%2C terminal%2C interacting protein 2	-
100169410	63.86583236	67.77674189	67.18999577	59.69261086	59.42252123	59.63496891	-0.146512882	0.010507195	0.031043448	LOC100169410	NC_042494.1	158076187	158079358	-	2281	protein_coding	52 kDa repressor of the inhibitor of the protein kinase%2C transcript variant X6	THAP
100163613	48.37078821	49.48167498	48.96671601	57.37355146	59.19035982	60.9838016	0.280960424	7.66E-06	4.45E-05	Fis1	NC_042494.1	124753144	124756830	+	1657	protein_coding	mitochondrial fission 1 protein%2C transcript variant X1	-
100162193	739.1955815	453.2963236	580.7350269	48.93581959	58.96224747	62.86082193	-3.370650001	7.87E-49	6.27E-47	LOC100162193	NC_042494.1	102841210	102842885	-	1430	protein_coding	skin secretory protein xP2-like	-
100167503	36.59969515	41.18198201	39.53923392	63.72686159	58.83262393	63.64226214	0.673724786	6.86E-22	1.67E-20	LOC100167503	NC_042493.1	11614738	11622270	+	2075	protein_coding	phenoloxidase-activating factor 2%2C transcript variant X1	Trypsin
100162666	34.52653099	37.45615235	36.08975263	65.13805488	58.71076023	57.84556613	0.756753333	1.27E-27	4.16E-26	LOC100162666	NC_042493.1	11523513	11548598	-	2729	protein_coding	phenoloxidase-activating factor 2	Trypsin
100302481	14.395778	12.50344992	16.84897001	47.77057318	58.67732673	73.65190258	2.04943087	9.66E-39	5.39E-37	NV12	NC_042493.1	112481406	112505954	+	527	protein_coding	uncharacterized LOC100302481	-
100569225	37.2954302	30.06358364	31.72957052	57.14782504	58.57526	57.32273738	0.809627896	3.67E-17	6.73E-16	LOC100569225	NC_042494.1	107314771	107316318	+	781	protein_coding	cuticle protein 12.5	-
100161840	75.35115128	82.90020244	80.15568463	63.69455235	58.56881314	64.02115085	-0.348797123	2.15E-07	1.54E-06	LOC100161840	NC_042495.1	112122571	112127995	-	1721	protein_coding	ruvB-like helicase 1	-
107883010	46.73611904	54.2970661	49.28453782	68.94643618	58.50195817	64.23683314	0.35801322	1.39E-05	7.79E-05	LOC107883010	NC_042494.1	106493109	106494701	+	1593	protein_coding	A-kinase anchor protein 200	-
100163703	49.72358596	51.05266208	48.92527924	65.32370526	58.32725691	62.81342979	0.323719896	5.60E-08	4.34E-07	LOC100163703	NC_042495.1	106454408	106467768	+	7892	protein_coding	CAD protein	CPSase_L_D2
100161887	43.71865522	43.41816664	42.89780881	48.83566774	58.30234358	52.00850305	0.298107129	6.90E-05	0.000344368	LOC100161887	NC_042495.1	54293301	54311183	-	2166	protein_coding	androgen-induced gene 1 protein-like%2C transcript variant X1	-
103310367	48.99546036	48.57834767	45.99073425	61.87098897	58.28393762	54.11826123	0.28645052	1.12E-05	6.37E-05	LOC103310367	NC_042494.1	84337253	84344987	-	5600	protein_coding	sodium/potassium-transporting ATPase subunit alpha	E1-E2_ATPase
103308056	50.4198642	47.39643308	45.42031165	51.11525698	58.16489173	57.34538607	0.224284185	0.003518039	0.011974994	LOC103308056	NC_042494.1	101099475	101102774	-	1546	protein_coding	protein eiger	-
100166892	48.04682177	47.04140628	48.94886176	51.63421402	58.05506362	52.80673803	0.180784184	0.005290523	0.017192293	LOC100166892	NC_042493.1	56450649	56491694	-	3032	protein_coding	cytosolic purine 5'-nucleotidase%2C transcript variant X2	-
100166916	35.44431394	37.03256807	35.79504035	59.76091929	58.05327	60.72588958	0.728455062	1.08E-32	4.41E-31	LOC100166916	NC_042496.1	16927339	16932771	-	2187	protein_coding	maltase A2%2C transcript variant X2	-
100164964	65.01840213	66.23182634	65.55937868	57.87697627	57.97554275	60.46059858	-0.151886488	0.013081473	0.037524799	LOC100164964	NC_042494.1	1230845	1242746	-	1532	protein_coding	pyridoxine-5'-phosphate oxidase-like%2C transcript variant X1	Pyridox_oxidase
100166714	47.91228215	52.47229775	50.46871986	58.49600439	57.95297658	66.13226534	0.282345214	0.000957001	0.003766178	LOC100166714	NC_042493.1	67172815	67179558	+	763	protein_coding	MRG-binding protein-like	-
100159304	50.92089844	51.51268845	52.92579894	64.82033459	57.94845269	64.89613739	0.279566416	0.000226582	0.001017297	LOC100159304	NC_042494.1	118108633	118111391	+	1046	protein_coding	DDRGK domain-containing protein 1-like	-
100162555	73.05013764	69.05913901	69.43691418	60.34051851	57.94040583	59.51456336	-0.244152461	1.74E-05	9.63E-05	LOC100162555	NC_042495.1	54350682	54364290	-	3255	protein_coding	procollagen-lysine%2C2-oxoglutarate 5-dioxygenase%2C transcript variant X1	-
100167165	79.87325521	69.50109106	73.68092469	53.94406704	57.83075597	54.80514771	-0.414755873	6.72E-10	6.49E-09	LOC100167165	NC_042493.1	16988630	17017572	+	4288	protein_coding	scavenger receptor class B member 1%2C transcript variant X2	-
100168103	88.20087845	95.62317933	93.01643302	44.78549786	57.79096856	52.87881335	-0.825723681	4.69E-22	1.17E-20	LOC100168103	NC_042494.1	22191857	22195901	-	1936	protein_coding	decaprenyl-diphosphate synthase subunit 2	-
100163609	68.62748641	70.49725237	70.74858798	59.90705486	57.47348686	63.05758245	-0.211143839	0.000471867	0.00199642	LOC100163609	NC_042494.1	91929337	91933183	-	2416	protein_coding	eukaryotic translation initiation factor 3 subunit E%2C transcript variant X2	-
100166051	414.9548395	264.6564715	319.0668715	25.30440207	57.43721914	44.29957571	-2.969402237	1.17E-15	1.93E-14	LOC100166051	NC_042494.1	98836987	98838593	-	1607	protein_coding	non-classical arabinogalactan protein 31	-
100161706	66.93022321	75.21334545	72.73463296	59.74988357	57.30796193	60.64374039	-0.266879795	2.69E-05	0.000144265	LOC100161706	NC_042493.1	11216295	11224550	-	2758	protein_coding	threonine--tRNA ligase%2C cytoplasmic%2C transcript variant X1	tRNA-synt_2b
100168477	75.15292947	87.47482109	81.01469805	62.37625978	57.28377951	59.46144151	-0.4365441	8.80E-10	8.43E-09	LOC100168477	NC_042494.1	142395977	142410040	+	2031	protein_coding	nuclear autoantigenic sperm protein	-
100162973	29.10125032	28.52240909	28.44907829	44.73847896	57.22951979	50.68757804	0.833175657	1.63E-21	3.91E-20	LOC100162973	NC_042493.1	61274577	61284828	+	2145	protein_coding	alpha-tocopherol transfer protein	-
100159220	67.62835502	71.21958421	68.71713748	64.81022003	57.22830042	58.88235429	-0.19114826	0.00392197	0.013165303	LOC100159220	NC_042495.1	19126577	19132668	-	2436	protein_coding	polyadenylate-binding protein 2-B%2C transcript variant X3	RRM_1
100169193	117.3462624	99.98633905	102.9676607	50.63087237	57.19929016	54.02836884	-0.978514757	5.35E-34	2.31E-32	LOC100169193	NC_042493.1	73231883	73262704	-	1356	protein_coding	alpha-tocopherol transfer protein-like	-
100164697	66.61850471	74.9137197	69.98210038	60.69889063	57.04185347	60.4571508	-0.240161671	0.000149944	0.000698661	LOC100164697	NC_042494.1	18490425	18499097	+	3240	protein_coding	coatomer subunit beta	-
100161602	83.18640175	105.4073812	93.58252071	45.6346894	57.02004754	51.74196311	-0.862738248	2.42E-19	5.06E-18	LOC100161602	NC_042493.1	67900931	67902982	+	1583	protein_coding	uncharacterized LOC100161602%2C transcript variant X1	-
100160442	70.53244454	60.22252452	65.41893522	51.08016192	56.85537047	53.25023232	-0.27709607	0.000317372	0.00138703	LOC100160442	NC_042494.1	134599072	134602500	+	1867	protein_coding	lambda-crystallin homolog%2C transcript variant X1	3HCDH_N
100168986	68.2473703	67.28382401	66.36313287	54.30339593	56.79811534	53.0536759	-0.29180812	8.03E-07	5.33E-06	LOC100168986	NC_042496.1	36866878	36870979	+	2263	protein_coding	signal recognition particle receptor subunit alpha homolog	-
100160080	42.56156431	42.09643371	41.95239898	57.54388058	56.53672885	57.19662166	0.442666125	4.16E-16	7.08E-15	LOC100160080	NC_042493.1	78841767	78849391	-	3299	protein_coding	long-chain-fatty-acid--CoA ligase 4%2C transcript variant X1	AMP-binding
100163130	66.68436581	72.83400892	69.05486501	61.38333585	56.40283188	61.30935022	-0.212792504	0.002091464	0.007557725	LOC100163130	NC_042496.1	22707094	22718444	-	1400	protein_coding	protein RRP5 homolog%2C transcript variant X1	-
100160045	51.3783687	48.63038937	50.58034054	58.16734513	56.07720709	58.17756345	0.201971624	0.001598593	0.005952559	LOC100160045	NC_042494.1	18049168	18055910	+	1674	protein_coding	sugar transporter SWEET1-like%2C transcript variant X1	-
100158983	41.55075615	42.1265781	42.59408105	57.27232364	56.07533962	60.58180054	0.468844901	1.07E-10	1.12E-09	LOC100158983	NC_042495.1	83338592	83339907	+	1087	protein_coding	uncharacterized protein LOC100158983	-
100167028	28.92983613	23.24387076	24.60458341	61.28246187	56.01934305	61.02537078	1.221778371	8.21E-48	6.32E-46	LOC100167028	NC_042495.1	107423936	107448896	+	3723	protein_coding	bacitracin synthase 3%2C transcript variant X4	AMP-binding
100165305	52.14525276	46.29129146	49.52852239	55.64977748	55.99272923	55.77181375	0.184671019	0.002941194	0.010201079	LOC100165305	NC_042495.1	101507590	101519586	+	4428	protein_coding	transcription elongation regulator 1	FF
100167571	49.65306795	53.62627766	51.56792264	60.67984969	55.93407403	65.00044704	0.236956819	0.003321572	0.011387317	LOC100167571	NC_042494.1	73856389	73862717	+	969	protein_coding	myosin-2 essential light chain-like	efhand
100161454	64.0890193	69.56040734	64.22063861	53.55496858	55.89554879	53.93471094	-0.269360193	1.54E-05	8.61E-05	LOC100161454	NC_042493.1	54385288	54396774	-	2105	protein_coding	non-specific lipid-transfer protein	Thiolase_N
100165792	41.826085	43.67483845	40.5944295	63.14211889	55.76584243	60.89374463	0.518631237	3.30E-13	4.40E-12	LOC100165792	NC_042496.1	532798	538871	-	1905	protein_coding	lysosomal Pro-X carboxypeptidase	Peptidase_S28
100166221	42.29767938	35.84138489	37.70920251	56.97457842	55.66886863	58.26833633	0.567179685	8.70E-15	1.32E-13	LOC100166221	NC_042495.1	71842697	71856373	-	2959	protein_coding	alpha-aminoadipic semialdehyde synthase%2C mitochondrial	Saccharop_dh
100162301	65.85874469	70.58188062	73.24117535	62.19084645	55.60690009	56.99200159	-0.254878324	0.002577666	0.009081696	LOC100162301	NC_042495.1	1027669	1028429	+	647	protein_coding	39S ribosomal protein L14%2C mitochondrial-like	-
100164300	46.42286082	40.84194021	42.93447863	53.83656768	55.47214553	53.50926323	0.328919554	5.84E-07	3.95E-06	LOC100164300	NC_042494.1	159160332	159172245	+	3481	protein_coding	carnitine O-palmitoyltransferase 1%2C liver isoform%2C transcript variant X2	-
100161670	64.45051957	69.62045424	66.12007424	54.28986389	55.4592216	53.45605754	-0.2876906	1.56E-07	1.14E-06	LOC100161670	NC_042495.1	76801723	76823524	-	4803	protein_coding	hydroxymethylglutaryl-CoA synthase 2%2C transcript variant X3	FKBP_C
100163667	66.39766981	63.33340257	63.79245094	52.20432412	55.40651017	53.33892156	-0.259303146	6.08E-06	3.58E-05	LOC100163667	NC_042493.1	91820391	91829064	-	3249	protein_coding	piwi-like protein Siwi%2C transcript variant X1	Piwi
100166836	49.03584954	51.0793872	47.52424891	55.39949154	55.38458958	55.38932305	0.177286329	0.003353495	0.011476808	LOC100166836	NC_042494.1	18045189	18048496	-	2162	protein_coding	probable serine incorporator%2C transcript variant X3	TMS_TDE
100159824	60.5170383	62.86251049	61.5255483	53.29347714	55.26753452	55.68286828	-0.164086826	0.001956532	0.007122338	LOC100159824	NC_042495.1	1181359	1190485	+	4161	protein_coding	cullin-associated NEDD8-dissociated protein 1	-
100165823	41.84077031	43.71936196	42.73788357	56.7229237	54.98786524	57.00744216	0.4020712	6.88E-11	7.32E-10	LOC100165823	NC_042496.1	9590537	9593444	+	1925	protein_coding	uncharacterized LOC100165823	-
100168209	48.21222075	46.76849441	46.01715728	53.62974385	54.91207781	54.07217573	0.212340721	0.000133229	0.000628764	LOC100168209	NC_042494.1	151791270	151820064	+	3426	protein_coding	aldehyde dehydrogenase%2C dimeric NADP-preferring%2C transcript variant X4	Aldedh
100161313	37.30327222	35.62353067	36.04258878	48.95021961	54.76125958	50.73648672	0.509750292	9.43E-15	1.43E-13	LOC100161313	NC_042494.1	27190940	27301697	+	2901	protein_coding	uncharacterized protein C34C12.4%2C transcript variant X7	-
100158818	61.03189602	67.42966431	67.76389703	56.32393479	54.59358502	59.24326459	-0.198244992	0.009431282	0.028320773	LOC100158818	NC_042495.1	23009888	23012353	-	950	protein_coding	proteasome inhibitor PI31 subunit-like	-
100165680	63.91229494	56.66634502	59.39861389	44.99426517	54.52704	51.31629032	-0.248515073	0.002118569	0.007639922	LOC100165680	NC_042493.1	31035508	31040523	-	2478	protein_coding	5-aminolevulinate synthase%2C erythroid-specific%2C mitochondrial	Aminotran_1_2
100166799	59.59270732	70.63049899	64.58856807	59.85966918	54.47831473	56.94580989	-0.178385565	0.014492116	0.040975289	LOC100166799	NC_042494.1	86633419	86639094	+	2934	protein_coding	ribosomal RNA processing protein 1 homolog	-
100163617	67.64099447	68.12389881	68.28228639	58.04703955	54.36877444	59.54883703	-0.239963178	2.78E-05	0.000148887	LOC100163617	NC_042494.1	36917667	36973782	-	4079	protein_coding	location of vulva defective 1%2C transcript variant X3	-
100164693	62.31139786	58.90594768	63.11219685	53.88578428	54.30347274	53.26614197	-0.184320627	0.002488871	0.008808193	LOC100164693	NC_042494.1	2757779	2763794	-	2119	protein_coding	nucleobindin-2	-
100168987	0	0	0	52.36307837	54.20381135	54.51105036	13.64811171	6.24E-31	2.39E-29	LOC100168987	NW_021771440.1	15548	32962	-	1840	protein_coding	UDP-glucuronosyltransferase 2B13%2C transcript variant X1	UDPGT
100162045	66.53243427	64.23357216	65.07869451	54.83333489	54.20001501	57.5210166	-0.227088635	5.74E-05	0.00029089	LOC100162045	NC_042496.1	22868749	22875387	+	3308	protein_coding	armadillo segment polarity protein%2C transcript variant X1	Arm
100168174	30.6611965	34.90858437	34.54945655	51.82473219	54.19744132	52.70851801	0.672505181	1.24E-20	2.82E-19	LOC100168174	NC_042493.1	58068835	58090341	+	1841	protein_coding	facilitated trehalose transporter Tret1	Sugar_tr
100165958	21.11021639	13.87488374	17.99395078	61.87916323	54.1942589	58.97892232	1.729862112	1.96E-47	1.49E-45	LOC100165958	NC_042495.1	112859521	112875548	-	1566	protein_coding	alpha-tocopherol transfer protein-like%2C transcript variant X1	-
100163777	34.75847803	37.14520566	37.07279237	50.35292816	54.15422664	54.67337785	0.553984764	1.01E-09	9.58E-09	LOC100163777	NC_042494.1	90269546	90276210	+	622	protein_coding	uncharacterized LOC100163777	-
100167404	45.76883461	51.7888407	49.10930085	55.41807915	54.10541585	54.57392627	0.169272028	0.009020561	0.027274317	LOC100167404	NC_042495.1	33479965	33486718	+	2440	protein_coding	stromal membrane-associated protein 1%2C transcript variant X1	-
100165153	61.44194388	71.73056499	64.85961545	60.19239322	53.92484908	58.2469954	-0.193041027	0.01393508	0.039620429	LOC100165153	NC_042494.1	106476260	106485379	-	1332	protein_coding	uncharacterized LOC100165153	-
100161453	60.60213295	65.47645471	61.8021604	55.4019831	53.36384582	56.99883446	-0.173781749	0.01065128	0.031431142	LOC100161453	NC_042494.1	65420478	65423652	+	1307	protein_coding	signal peptidase complex subunit 3-like	-
100160020	62.7943004	67.86893756	65.97801633	55.40147766	53.26760582	55.0955081	-0.256860047	1.09E-05	6.23E-05	LOC100160020	NC_042496.1	2933492	2944796	-	2842	protein_coding	probable protein phosphatase 2C 6	PP2C
100163749	109.2749377	71.81979451	96.53327463	55.65229895	53.07418677	52.07004805	-0.781891575	7.00E-11	7.44E-10	cp22	NC_042494.1	62540159	62541282	-	986	protein_coding	cuticular protein 22	Chitin_bind_4
100165871	64.0931339	76.87773411	72.08567517	63.35357842	53.07412836	56.15849761	-0.296381048	0.00068034	0.002769994	LOC100165871	NC_042494.1	160317898	160323830	-	1475	protein_coding	pentatricopeptide repeat-containing protein 2%2C mitochondrial	-
100161502	63.04178469	72.86649482	67.14233387	59.50170725	53.03954067	59.043301	-0.235716272	0.00197041	0.007167894	LOC100161502	NC_042495.1	78010037	78014245	+	1701	protein_coding	heat shock 70 kDa protein 14	HSP70
100162050	21.17235748	25.59913127	24.43175201	59.06103657	52.83672308	56.47904697	1.249698391	4.19E-47	3.16E-45	LOC100162050	NC_042495.1	69855699	69889567	+	1476	protein_coding	uncharacterized LOC100162050%2C transcript variant X1	-
100162026	39.55333862	46.37683841	44.92713863	51.56653466	52.65509819	50.8333742	0.2526348	0.002312341	0.008255203	LOC100162026	NC_042494.1	147733490	147745627	-	964	protein_coding	short-chain dehydrogenase/reductase-like	adh_short
100165288	61.54389104	70.8917085	69.22940941	54.12210708	52.59005304	53.08168851	-0.328043625	8.75E-05	0.000427602	LOC100165288	NC_042494.1	23611220	23613202	-	693	protein_coding	DNA-directed RNA polymerases I%2C II%2C and III subunit RPABC2-like	-
100165606	33.4509149	35.98039175	35.29496258	52.2633461	52.5821209	51.91994158	0.589276901	3.75E-18	7.31E-17	LOC100165606	NC_042494.1	157496961	157499555	-	1530	protein_coding	uncharacterized LOC100165606	-
100164494	25.3299635	26.63891514	24.17412774	50.53701405	52.44573763	49.14261843	1.005044885	1.04E-51	9.22E-50	LOC100164494	NC_042494.1	81742255	81761906	-	2663	protein_coding	serine proteinase stubble%2C transcript variant X3	Trypsin
100165620	39.9088113	30.39455388	33.83626319	47.58977165	52.40883132	50.7173608	0.539163605	6.86E-09	5.92E-08	LOC100165620	NC_042496.1	8501556	8549590	-	2489	protein_coding	calcium/calmodulin-dependent protein kinase kinase 1%2C transcript variant X1	Pkinase
100163783	40.67785749	42.82916193	44.94678144	55.37465499	52.40369243	56.74497293	0.364610184	5.70E-06	3.37E-05	LOC100163783	NC_042496.1	9691590	9692784	+	890	protein_coding	peptidyl-tRNA hydrolase ICT1%2C mitochondrial	-
100571399	39.74985364	44.09167382	45.91324068	54.78572033	52.2495321	55.83972987	0.335877127	5.67E-05	0.000287801	LOC100571399	NC_042494.1	49722827	49730600	-	891	lncRNA	uncharacterized LOC100571399%2C transcript variant X1	-
100169489	64.31905855	67.89341802	69.51126995	57.63435809	52.24015567	59.47188837	-0.245233485	0.002096839	0.007575414	LOC100169489	NC_042496.1	40357415	40524135	-	844	protein_coding	sex-regulated protein janus-A	-
100168424	55.81737783	72.97040723	63.23898149	44.31276275	52.13732001	53.76756078	-0.346954933	0.0010894	0.004229198	LOC100168424	NC_042495.1	96677571	96685550	+	831	protein_coding	uncharacterized LOC100168424	-
100167204	65.28907962	76.05304049	70.54339537	43.664858	51.98737268	46.44784131	-0.569300257	3.63E-13	4.81E-12	LOC100167204	NC_042493.1	79543110	79556667	-	3430	protein_coding	mucin-5AC%2C transcript variant X1	-
115033157	0	0	0	56.66799044	51.94566899	56.83410064	13.14619724	8.77E-29	3.05E-27	LOC115033157	NC_042493.1	72359146	72360705	+	1265	protein_coding	uncharacterized LOC115033157	DDE
100160730	28.7556633	29.34627646	30.17534963	50.44492169	51.94504524	50.77916076	0.802201109	8.65E-38	4.58E-36	LOC100160730	NC_042494.1	135047577	135068934	+	2261	protein_coding	short-chain dehydrogenase/reductase family 16C member 6%2C transcript variant X3	adh_short
100161286	42.21666693	39.05081553	39.49080188	48.36482039	51.74979253	52.68706326	0.345763145	6.14E-07	4.14E-06	LOC100161286	NC_042494.1	3095172	3141853	-	1933	protein_coding	solute carrier family 46 member 3-like	MFS_1
100160754	41.67265485	40.9971433	39.8541517	48.49272206	51.67929475	50.70485913	0.306684201	1.37E-05	7.70E-05	LOC100160754	NC_042494.1	78143855	78154710	+	1297	protein_coding	hydroxylysine kinase	APH
100167235	29.94307556	33.86936147	32.80702567	56.40701489	51.54502308	54.08906298	0.753620184	6.92E-21	1.60E-19	LOC100167235	NC_042493.1	4473848	4477894	+	1171	protein_coding	max-like protein X	HLH
100165900	74.92452189	68.0678595	73.09515124	49.43110841	51.53921353	51.52109166	-0.496352225	6.18E-14	8.75E-13	LOC100165900	NC_042495.1	85484634	85496235	-	1767	protein_coding	putative phospholipase B-like 2	-
100161393	41.2322571	40.75972068	39.63764483	50.6448309	51.47422595	49.28362589	0.322568619	4.34E-09	3.84E-08	LOC100161393	NC_042495.1	13980447	13999556	+	4414	protein_coding	probable multidrug resistance-associated protein lethal(2)03659	ABC_membrane
100575717	27.84453042	30.64328561	28.7448767	51.04255954	51.42986609	53.64226342	0.846677408	1.62E-34	7.14E-33	LOC100575717	NC_042495.1	68883641	68885495	+	1855	protein_coding	uncharacterized LOC100575717	-
100162711	41.50920491	42.5275505	41.52631934	52.91173776	51.40641434	49.8451446	0.302970481	4.63E-07	3.16E-06	LOC100162711	NC_042493.1	3639288	3716049	+	2483	protein_coding	uncharacterized LOC100162711	Zona_pellucida
100166638	42.04319558	43.93224118	47.0476893	52.52872141	51.39402507	49.64142393	0.21508422	0.009352259	0.028120942	LOC100166638	NC_042494.1	78275754	78276717	-	805	protein_coding	uncharacterized protein LOC100166638	-
100164839	33.14088878	32.68129967	34.50893111	47.41919707	51.34406608	51.12678051	0.586085958	9.56E-19	1.94E-17	LOC100164839	NC_042493.1	79071654	79079044	-	2237	protein_coding	kynurenine--oxoglutarate transaminase 3	Aminotran_1_2
100158884	72.63859001	75.17025503	71.33389898	64.07906863	51.31349244	58.65570643	-0.325444783	6.92E-05	0.000344917	LOC100158884	NC_042496.1	21459397	21473349	-	1716	protein_coding	phosphoserine phosphatase-like%2C transcript variant X2	Hydrolase
100167222	61.16964115	68.87238826	64.05124683	54.81322873	51.2935218	54.81760938	-0.263236571	0.001106001	0.004286264	LOC100167222	NC_042496.1	9350526	9351375	+	766	protein_coding	LSM7 homolog%2C U6 small nuclear RNA associated (S. cerevisiae)-like	LSM
100159409	47.28200513	45.67640641	45.11640936	52.30157808	51.26752212	53.94276044	0.196458126	0.001440492	0.005429202	LOC100159409	NC_042494.1	90939407	90948111	+	2184	protein_coding	synapse-associated protein of 47 kDa%2C transcript variant X5	-
100164711	31.50858511	34.68671142	32.95267559	44.65128982	51.17428899	45.41098352	0.517514964	6.77E-13	8.75E-12	LOC100164711	NC_042495.1	12928228	12939684	+	3316	protein_coding	peroxidase%2C transcript variant X1	An_peroxidase
100568480	41.00123175	45.36926774	43.71072192	55.30556253	51.17345603	51.78167674	0.290314057	0.000140919	0.000662082	LOC100568480	NC_042496.1	6637692	6638829	-	1138	protein_coding	39S ribosomal protein L10%2C mitochondrial	-
100164077	43.89167979	47.75196542	46.68509801	51.53166797	51.13875082	51.77510087	0.166191697	0.00664681	0.020956578	LOC100164077	NC_042493.1	82255844	82290685	+	2393	protein_coding	cationic amino acid transporter 2%2C transcript variant X1	-
100163307	34.8015879	34.44105384	32.05407874	47.46920879	51.1383515	50.54111579	0.564214162	3.45E-14	5.00E-13	LOC100163307	NC_042496.1	19391593	19394196	-	1378	protein_coding	ras-related protein Rab-39B%2C transcript variant X2	Ras
100162370	31.48420245	28.33010165	34.2099223	51.09572331	51.0658426	50.58768712	0.707774424	6.69E-13	8.66E-12	LOC100162370	NW_021765230.1	4817	5449	+	633	protein_coding	uncharacterized LOC100162370	-
100168933	60.56883879	64.90039854	61.5162895	53.73396738	51.04684665	50.92574341	-0.257068358	1.98E-05	0.000108088	LOC100168933	NC_042495.1	89299342	89302189	+	2607	protein_coding	selenide%2C water dikinase	-
100163615	34.47372928	38.65345802	34.49001284	48.1716323	51.00297325	51.95280358	0.496674384	2.71E-12	3.30E-11	LOC100163615	NC_042496.1	2601497	2607047	-	2187	protein_coding	uncharacterized LOC100163615	-
100169479	49.39829516	47.14964878	45.97525073	55.77442063	50.88996943	55.42879367	0.191912353	0.008554165	0.026043819	LOC100169479	NC_042494.1	25483794	25489177	-	1348	protein_coding	UDP-xylose and UDP-N-acetylglucosamine transporter	-
100167666	34.09224406	36.3275439	36.75534362	48.89565903	50.86503823	51.29224405	0.50241945	2.93E-13	3.92E-12	LOC100167666	NC_042496.1	33397183	33419473	-	1590	protein_coding	growth arrest-specific protein 2	CH
100570996	15.11545193	17.00661272	17.05297792	53.5851388	50.63190113	50.40510213	1.660893793	3.91E-102	1.26E-99	LOC100570996	NC_042493.1	31643729	31648295	-	1849	protein_coding	collagen alpha-1(IV) chain-like	Collagen
100165082	34.33033036	33.53093216	34.21746882	49.93204603	50.53374371	48.48027611	0.55193469	3.79E-17	6.94E-16	LOC100165082	NC_042494.1	106936296	106941565	+	1745	protein_coding	methanethiol oxidase	-
100168156	38.07617846	34.30898188	34.30041803	52.27607554	50.5330493	52.7793034	0.550655779	2.57E-17	4.76E-16	LOC100168156	NC_042495.1	619991	657985	+	3891	protein_coding	paxillin%2C transcript variant X3	LIM
100168755	30.42010408	31.54225382	30.05721866	50.39372458	50.28707104	48.97726833	0.708482282	2.16E-38	1.17E-36	LOC100168755	NC_042494.1	148705346	148742873	+	4900	protein_coding	peroxidasin	An_peroxidase
100167982	67.7992588	75.74195914	68.42155907	53.81843013	50.23831872	52.83064587	-0.427086471	5.20E-10	5.08E-09	LOC100167982	NC_042495.1	98865335	98875036	-	1795	protein_coding	ruvB-like 2	-
100158750	58.223548	63.30006679	55.48508135	47.52807278	50.08872112	50.65805703	-0.249062868	0.00140998	0.005325653	LOC100158750	NC_042496.1	950949	953519	+	1010	protein_coding	protein N-terminal glutamine amidohydrolase-like	-
100168834	36.6631687	39.19169185	35.59757168	48.42809542	49.88528734	46.25220574	0.38210513	4.95E-09	4.34E-08	LOC100168834	NC_042494.1	129296892	129313341	-	2838	protein_coding	esterase E4%2C transcript variant X1	COesterase
100168047	67.34203614	68.18402261	65.08371075	50.79473509	49.86941261	54.72640081	-0.36198611	4.14E-08	3.26E-07	LOC100168047	NC_042496.1	40014501	40018954	-	1649	protein_coding	alpha-tubulin N-acetyltransferase 1-like%2C transcript variant X1	-
100165058	54.24970268	59.29556159	54.92195476	49.56554795	49.84455701	50.00237503	-0.166220622	0.008051046	0.024762712	LOC100165058	NC_042495.1	65352844	65355588	-	2110	protein_coding	solute carrier family 35 member B1	-
100162106	54.67020745	58.60515556	54.0338877	48.44878077	49.82130066	50.08131338	-0.166732407	0.009105801	0.027489902	LOC100162106	NC_042495.1	47038165	47044839	-	1868	protein_coding	poly(rC)-binding protein 3	KH_1
100574458	42.21695813	47.77608972	41.35664669	54.48272422	49.72497166	57.42389476	0.305892328	0.000765677	0.003073031	ACYPI41475	NC_042494.1	137087509	137099068	+	838	protein_coding	MD-2-related lipid-recognition protein-like	-
100160566	53.60274381	54.81126456	54.36049999	38.32085891	49.52081548	45.59544599	-0.280047903	0.000934261	0.00368588	LOC100160566	NC_042494.1	93310609	93325049	-	2816	protein_coding	choline transporter-like protein 1	-
100167700	59.59622812	56.70816998	56.62171781	49.19273961	49.43973534	51.65837351	-0.195903838	0.000793273	0.003170881	LOC100167700	NC_042495.1	103806609	103823559	+	3166	protein_coding	phosphatidylserine decarboxylase proenzyme%2C mitochondrial%2C transcript variant X1	-
100166238	63.48831	73.01346924	64.66188517	51.99452664	49.18995317	50.11036205	-0.403903653	1.16E-08	9.75E-08	LOC100166238	NC_042494.1	153727330	153732031	+	2050	protein_coding	cytosolic non-specific dipeptidase	Peptidase_M20
100163113	41.64741026	42.75431614	41.77837179	49.35813923	49.18340992	48.75033528	0.230056886	0.002679452	0.009402515	LOC100163113	NC_042494.1	1428404	1429384	+	874	protein_coding	succinate dehydrogenase assembly factor 2-A%2C mitochondrial-like	-
100160387	38.22323204	40.42955396	43.02453976	48.39259832	49.17900044	49.8927424	0.28505273	0.000280216	0.001235596	LOC100160387	NC_042494.1	56708714	56713745	+	1014	protein_coding	uncharacterized LOC100160387%2C transcript variant X1	-
100166856	53.73844696	60.54417725	55.30275327	51.29472269	48.71028844	50.70262606	-0.163186185	0.013360998	0.03822932	LOC100166856	NC_042496.1	2717810	2721667	-	2528	protein_coding	probable ATP-dependent RNA helicase DDX27	DEAD
100159187	28.1138829	23.75423868	23.13902851	49.70983332	48.63172436	49.32819845	0.982466941	4.06E-29	1.43E-27	LOC100159187	NC_042495.1	52815640	52832224	-	1394	protein_coding	protein obstructor-E	CBM_14
100168877	54.34601187	57.48832058	56.16697298	47.82063275	48.57436132	47.03954805	-0.221022089	0.000156821	0.000727056	LOC100168877	NC_042495.1	63230394	63238316	+	2452	protein_coding	heterogeneous nuclear ribonucleoprotein A1%2C A2/B1 homolog%2C transcript variant X2	RRM_1
100158845	103.2972983	103.914467	100.6549422	35.49231313	48.46988821	41.77026791	-1.285353086	2.67E-43	1.77E-41	LOC100158845	NC_042494.1	81587559	81599295	+	1623	protein_coding	alpha-tocopherol transfer protein-like	-
100164252	59.60292692	65.32095592	63.47701514	54.47822445	48.4529375	52.41605816	-0.271037619	0.000724865	0.002927852	LOC100164252	NC_042495.1	75648266	75652792	-	860	protein_coding	oligosaccharyltransferase complex subunit OSTC-like%2C transcript variant X1	-
100167074	63.635451	62.98672202	59.93299821	49.22462718	48.43616733	48.21158734	-0.34820703	8.33E-11	8.81E-10	LOC100167074	NC_042494.1	55107393	55119699	-	5481	protein_coding	DNA topoisomerase 2	DNA_gyraseB
100158916	35.91298481	38.45052794	36.48414297	49.10746461	48.25961904	50.37590094	0.421419916	9.41E-12	1.09E-10	LOC100158916	NC_042494.1	11627501	11641076	+	2512	protein_coding	sodium-coupled neutral amino acid transporter 9%2C transcript variant X2	Aa_trans
100161052	45.63315567	43.95638215	44.37695783	54.52898625	48.25016156	49.5658115	0.1922912	0.002334368	0.008321902	LOC100161052	NC_042495.1	58693057	58726208	-	6408	protein_coding	uncharacterized LOC100161052%2C transcript variant X2	-
100165918	62.46181935	61.88416353	62.94803215	54.54781708	48.16042491	53.06594782	-0.259036737	0.001042162	0.004062808	LOC100165918	NC_042493.1	71735388	71739022	+	837	protein_coding	cytochrome c oxidase subunit 5B%2C mitochondrial	-
100163149	57.63640131	60.52139316	54.82945032	51.55361884	48.07837343	51.18387449	-0.191233672	0.004428895	0.014645707	LOC100163149	NC_042495.1	49861678	49869503	+	1926	protein_coding	ATP-dependent RNA helicase DDX19A%2C transcript variant X1	DEAD
100166387	41.2352929	43.01639241	42.38673173	48.16332567	48.00754799	47.10817224	0.18520473	0.006253129	0.019874219	LOC100166387	NC_042495.1	72167890	72173175	-	1367	protein_coding	DET1- and DDB1-associated protein 1	-
100159828	42.75286779	46.60317408	44.90040374	61.20046594	48.00527918	57.29767297	0.317744749	0.000207045	0.000937317	LOC100159828	NC_042495.1	112737873	112747943	-	3150	protein_coding	glucose dehydrogenase [FAD%2C quinone]	-
100164092	42.5744281	42.35759571	40.25847286	47.45815086	47.81617764	48.99974668	0.211106142	0.00061772	0.002540607	LOC100164092	NC_042495.1	84411066	84419035	-	2299	protein_coding	embryonic polarity protein dorsal%2C transcript variant X1	RHD
100164245	13.38431956	10.24830575	9.959240736	57.44094691	47.76267512	54.80691515	2.256128139	1.58E-88	3.47E-86	LOC100164245	NC_042494.1	54543634	54554541	+	1583	protein_coding	gastric triacylglycerol lipase	Abhydrolase_1
100161784	37.60385874	41.28942687	38.1525201	42.66964757	47.7616163	43.60569068	0.202511594	0.00364296	0.012346935	LOC100161784	NC_042495.1	72301247	72306292	+	2813	protein_coding	sulfhydryl oxidase 2%2C transcript variant X2	Evr1_Alr
100167257	25.64583317	27.36736998	31.01950011	48.42376908	47.76094231	48.37996236	0.791208711	3.21E-19	6.67E-18	LOC100167257	NC_042494.1	40730236	40736418	-	1053	protein_coding	phytanoyl-CoA dioxygenase domain-containing protein 1	PhyH
100167345	35.04431587	35.7301804	30.30707943	48.96030493	47.73446132	49.13778082	0.534211774	1.26E-08	1.06E-07	LOC100167345	NC_042494.1	123557162	123570669	-	719	protein_coding	uncharacterized LOC100167345	-
100166121	34.88606584	40.98267245	36.49911274	53.59724023	47.72349181	48.63618085	0.423613889	5.85E-08	4.52E-07	LOC100166121	NC_042495.1	12492168	12545097	+	2542	protein_coding	ABC transporter G family member 9%2C transcript variant X1	ABC2_membrane
100164306	51.48404471	57.37380548	53.47274693	47.99993666	47.71472473	46.94716327	-0.179227231	0.003561468	0.01209412	LOC100164306	NC_042493.1	59733632	59741156	-	3122	protein_coding	dnaJ homolog subfamily C member 1%2C transcript variant X1	DnaJ
100165833	38.30583905	37.54669005	37.2127159	47.52530736	47.62396158	48.13471219	0.348320293	1.12E-09	1.06E-08	LOC100165833	NC_042495.1	8745417	8758436	+	2979	protein_coding	ecdysone 20-monooxygenase%2C transcript variant X1	p450
100168687	23.37574718	27.40796029	25.18626937	50.88525999	47.4862527	49.26245501	0.965915874	4.56E-40	2.71E-38	LOC100168687	NC_042494.1	111943116	111956956	+	2815	protein_coding	scoloptoxin SSD14%2C transcript variant X3	-
100574244	35.3282324	34.83644514	35.2956028	46.40612481	47.4819298	45.3949068	0.408150918	5.53E-12	6.56E-11	LOC100574244	NC_042493.1	17914344	17930315	+	2775	protein_coding	uncharacterized LOC100574244	IQ
100572942	54.00904771	61.58561575	59.94903098	48.36867584	47.45157815	46.0409233	-0.299822606	3.80E-05	0.000198228	ACYPI22208	NC_042494.1	85710624	85720012	-	1460	protein_coding	uncharacterized LOC100572942%2C transcript variant X1	-
100168884	38.79053803	41.1102515	40.38060244	49.35815662	47.42486847	48.41291121	0.278685246	2.77E-06	1.72E-05	LOC100168884	NC_042494.1	22923964	22929722	-	2807	protein_coding	dolichyl-diphosphooligosaccharide--protein glycosyltransferase subunit STT3A	-
100169461	61.89790649	64.83540711	59.26678682	50.75031656	47.39550625	48.13990755	-0.339733773	1.24E-07	9.22E-07	LOC100169461	NC_042494.1	90871598	90877952	+	2297	protein_coding	alpha-tubulin N-acetyltransferase 1%2C transcript variant X3	-
100160016	75.6279348	88.23753899	79.60181115	56.66684183	47.39441477	55.62244351	-0.601361069	2.98E-11	3.30E-10	LOC100160016	NC_042495.1	110768002	110770837	-	881	protein_coding	phosphatidylinositol glycan%2C class P-like	-
100161521	34.91420107	34.07820483	34.66913988	45.39080066	47.38839496	45.19191665	0.41924664	5.49E-12	6.53E-11	LOC100161521	NC_042494.1	97070207	97082808	+	2603	protein_coding	protein singed%2C transcript variant X1	-
100168713	17.7817354	18.76364911	18.16919848	55.64775291	47.31918829	54.27227298	1.52999993	3.38E-83	6.59E-81	LOC100168713	NC_042494.1	165557120	165568654	-	2456	protein_coding	fatty acyl-CoA reductase wat	NAD_binding_4
100162755	52.95197568	59.59522548	55.40846513	51.69186756	47.115325	50.02601726	-0.1672392	0.011839983	0.034458478	LOC100162755	NC_042496.1	8612220	8642726	-	3443	protein_coding	N-alpha-acetyltransferase 16%2C NatA auxiliary subunit	-
100166830	57.86078996	61.79473064	59.3479147	51.62301407	47.05345301	48.33197791	-0.277024056	8.02E-06	4.65E-05	LOC100166830	NC_042494.1	109366316	109374005	-	3174	protein_coding	putative pre-mRNA-splicing factor ATP-dependent RNA helicase PRP1%2C transcript variant X1	HA2
100168821	53.47361299	58.92009743	53.7384552	48.63376142	47.03868338	48.01458008	-0.202420369	0.000798335	0.00318869	LOC100168821	NC_042495.1	94265802	94271431	-	3985	protein_coding	rDNA transcriptional regulator pol5	-
100163428	41.82947583	40.78520632	40.78186693	50.31426979	46.988122	48.19114162	0.244351865	7.78E-05	0.000384606	LOC100163428	NC_042494.1	12098278	12104208	+	2495	protein_coding	facilitated trehalose transporter Tret1	Sugar_tr
100160162	54.03969061	53.58468966	52.78873872	42.30302138	46.87022636	45.04032015	-0.250621827	4.62E-05	0.000238199	LOC100160162	NC_042494.1	136979754	136999215	+	3026	protein_coding	echinoderm microtubule-associated protein-like 2%2C transcript variant X1	-
100575199	39.05596374	34.41660872	36.53902698	41.4726031	46.77140805	46.47909147	0.298507346	0.000190424	0.000869555	LOC100575199	NC_042494.1	97490496	97498067	+	1711	protein_coding	sodium-independent sulfate anion transporter	Sulfate_transp
100144776	62.42588068	66.6712121	63.35474043	47.79082466	46.75890587	49.21061209	-0.413952882	1.58E-11	1.79E-10	LOC100144776	NC_042493.1	11580469	11589914	-	2083	protein_coding	vasa-like protein	DEAD
100160528	54.07340205	58.57284672	58.70986839	48.2548616	46.75877323	46.79692463	-0.265754562	1.80E-05	9.89E-05	LOC100160528	NC_042495.1	8435965	8439996	+	2460	protein_coding	nucleolar complex protein 2 homolog	-
100165783	51.34265151	50.4966435	48.61472791	44.27911673	46.71181938	43.52708507	-0.154898246	0.009465787	0.02840719	LOC100165783	NC_042494.1	92586827	92607453	+	3420	protein_coding	midnolin-A	ubiquitin
100161081	295.6996745	203.9182147	239.8324341	26.94609248	46.6585232	39.26865464	-2.706090743	1.50E-23	4.03E-22	LOC100161081	NC_042494.1	98783039	98784460	-	1422	protein_coding	cuticular protein CPG12-like	-
100164691	9.118189161	3.48100052	6.038458866	46.75577363	46.65415513	47.04699131	2.91867722	1.64E-14	2.43E-13	LOC100164691	NC_042496.1	30575412	30591658	+	3091	protein_coding	nose resistant to fluoxetine protein 6	-
100161169	42.66545493	41.22633958	42.3093205	45.90141629	46.55248741	45.4117702	0.134290373	0.017419836	0.04800572	LOC100161169	NC_042496.1	36986401	37001434	+	3314	protein_coding	restriction of telomere capping protein 5%2C transcript variant X1	-
novel.694	13.39675728	9.554999093	11.91347958	40.92458282	46.47393767	39.56868525	1.870316373	1.00E-64	1.29E-62	-	NC_042495.1	112076401	112078674	-	2274	-	-	-
100163954	170.6662474	97.48267584	131.3937408	39.62578671	46.41984699	40.70240883	-1.650735156	9.91E-12	1.15E-10	LOC100163954	NC_042493.1	67278411	67289343	-	3070	protein_coding	uncharacterized PE-PGRS family protein PE_PGRS10	-
100159876	61.94220227	63.56650646	64.85496127	51.20357708	46.41125409	50.143202	-0.358433072	1.78E-06	1.13E-05	LOC100159876	NC_042494.1	46194313	46196328	+	950	protein_coding	U1 small nuclear ribonucleoprotein C%2C transcript variant X1	-
100161975	52.67820036	51.40327638	52.34878324	46.08073858	46.36615197	44.25703541	-0.187628255	0.002173542	0.007807825	LOC100161975	NC_042496.1	40291634	40302003	-	2064	protein_coding	PHD finger protein 7%2C transcript variant X3	-
100162721	57.64185513	62.85099892	60.34147071	50.10585171	46.28361099	50.9523362	-0.288456378	8.62E-05	0.000421926	LOC100162721	NC_042496.1	22924574	22925972	+	1205	protein_coding	thioredoxin domain-containing protein 9-like	-
100163195	3.766444418	4.908803447	5.310333952	30.38344554	46.25732759	37.62862872	3.0401447	2.87E-98	8.39E-96	LOC100163195	NC_042494.1	71194940	71198496	-	2056	protein_coding	probable cytochrome P450 6a13	p450
100572136	28.09414396	25.5133687	34.37705668	42.98339497	46.22451494	33.21031244	0.484801692	0.000429036	0.001832404	LOC100572136	NC_042494.1	59104393	59110702	-	680	protein_coding	four and a half LIM domains protein 2	LIM
100161000	38.2477158	41.32464528	38.25696834	42.39612418	46.2025972	46.11638859	0.200003009	0.002367455	0.008420049	LOC100161000	NC_042494.1	87809881	87815494	+	2964	protein_coding	endoplasmic reticulum aminopeptidase 2%2C transcript variant X2	-
100163534	54.26909949	61.3547453	58.20115642	49.82308848	46.19952872	47.55820523	-0.268466555	0.000151789	0.000705591	LOC100163534	NC_042494.1	40310540	40312239	+	1700	protein_coding	serine--tRNA ligase%2C cytoplasmic	tRNA-synt_2b
100158973	56.21190637	60.1113429	58.49983896	48.53470631	46.11896154	49.55830336	-0.27068474	0.000566637	0.002354446	LOC100158973	NC_042496.1	10143828	10148310	+	793	protein_coding	DNA-directed RNA polymerases I%2C II%2C and III subunit RPABC1-like	-
100166959	138.6792894	86.9258802	122.7875899	44.82072971	45.98060725	41.68173881	-1.388913167	1.82E-27	5.91E-26	LOC100166959	NC_042496.1	40827453	40828543	-	1091	protein_coding	3-oxoacyl-[acyl-carrier-protein] reductase FabG-like	-
100167377	57.74438666	59.70579135	63.56118273	51.82768003	45.9543936	47.894095	-0.305886829	5.87E-05	0.000296866	P5cr	NC_042495.1	67796144	67799059	-	1258	protein_coding	pyrroline 5-carboyxlate reductase	F420_oxidored
100159197	64.90792618	63.70719649	65.26863572	43.1837397	45.81652808	45.61778361	-0.519588499	4.65E-16	7.90E-15	LOC100159197	NC_042495.1	63755213	63775160	+	1577	protein_coding	cystathionine gamma-lyase%2C transcript variant 1	Cys_Met_Meta_PP
100162044	55.84301695	55.38774247	53.55226137	48.01240904	45.73985007	48.16997414	-0.208884746	0.00055672	0.002318736	LOC100162044	NC_042495.1	78180457	78183740	-	2356	protein_coding	glycine--tRNA ligase	HGTP_anticodon
100302489	50.81643693	54.27634985	48.12633448	41.43284619	45.6161547	44.49098921	-0.213769169	0.01635643	0.045427966	Lsm1	NC_042494.1	92944471	92945343	+	690	protein_coding	LSM1 homolog%2C U6 small nuclear RNA associated	LSM
novel.836	0	0	0	40.53616519	45.58647386	42.05960049	11.60238784	1.12E-22	2.90E-21	-	NW_021765984.1	3714	4273	+	560	-	-	-
100167137	33.64793111	39.4326252	37.96360979	44.42817875	45.57529921	45.02678663	0.289690776	7.94E-05	0.000391454	LOC100167137	NC_042494.1	116961806	116965983	-	2111	protein_coding	endoplasmic reticulum lectin 1%2C transcript variant X2	-
100164831	26.27284263	31.97206161	26.89436726	43.58680478	45.56341576	49.61523375	0.71161124	3.19E-13	4.25E-12	LOC100164831	NC_042494.1	59634465	59637621	+	977	protein_coding	uncharacterized LOC100164831	-
100574502	39.30867879	29.08555686	32.26749686	51.61650915	45.40883562	48.20517024	0.534565711	2.85E-07	2.00E-06	LOC100574502	NC_042494.1	8301601	8328692	+	1550	protein_coding	elongation of very long chain fatty acids protein 4	ELO
100165771	27.20429559	30.93789729	28.71075025	44.22911369	45.35019139	46.26823089	0.652568836	1.11E-16	1.96E-15	LOC100165771	NC_042495.1	68515843	68521798	-	1286	protein_coding	regucalcin-like	-
100159230	34.47162954	34.20162451	36.27070459	42.37056125	45.25542307	44.96623604	0.344511037	3.77E-06	2.29E-05	LOC100159230	NC_042494.1	122216923	122237800	-	1284	protein_coding	lipoma HMGIC fusion partner-like 2 protein-like%2C transcript variant X1	-
100162371	82.83776505	52.06559923	69.67967125	28.23334982	45.12805329	36.45334505	-0.892057394	0.000916907	0.003621942	cp45	NC_042493.1	36493834	36496148	-	801	protein_coding	cuticular protein 45	Chitin_bind_4
100163089	39.48029673	41.86928227	38.72896856	48.86162553	45.07286298	46.22570402	0.230005894	0.000161833	0.000748752	LOC100163089	NC_042495.1	68582077	68602151	+	4810	protein_coding	diacylglycerol kinase theta%2C transcript variant X2	RA
100167234	37.20691418	40.89094476	36.46506583	48.06501485	45.0546397	48.31422576	0.310682777	4.66E-05	0.000240139	Tipin	NC_042494.1	105063911	105066221	-	1384	protein_coding	TIMELESS-interacting protein	-
100162969	136.5768156	63.98191387	88.22182232	32.34580511	45.04586391	38.45975278	-1.312629643	0.000174751	0.0008031	LOC100162969	NC_042494.1	156699090	156700472	+	1273	protein_coding	tetra-peptide repeat homeobox protein 1-like	-
100575164	32.51927407	36.93462794	32.97953498	38.34992281	44.92210317	42.77808732	0.306193722	0.000113727	0.000543717	LOC100575164	NC_042495.1	112956597	112970260	-	2588	protein_coding	angiotensin-converting enzyme%2C transcript variant X3	Peptidase_M2
100158947	32.69271495	38.19494138	36.70483764	43.05164978	44.91033349	44.93668199	0.312427138	0.000166498	0.000768308	LOC100158947	NC_042496.1	19864309	19866624	-	1117	protein_coding	prostatic spermine-binding protein	-
100160991	27.92044015	16.2849098	20.13118768	48.73118602	44.85455646	49.04599861	1.154078318	9.83E-07	6.43E-06	LOC100160991	NC_042494.1	167515973	167548027	-	1429	protein_coding	inactive pancreatic lipase-related protein 1%2C transcript variant X1	Lipase
100169439	54.81190158	47.04564007	51.03088639	44.89744252	44.73293235	43.03224195	-0.198231578	0.003536268	0.01202926	LOC100169439	NC_042495.1	67253099	67276376	-	5497	protein_coding	probable cation-transporting ATPase 13A3%2C transcript variant X2	E1-E2_ATPase
100166958	30.01001051	31.55680501	32.439676	43.02268715	44.72900626	43.56004277	0.489488619	8.92E-15	1.35E-13	LOC100166958	NC_042494.1	108386164	108415555	-	2659	protein_coding	long-chain fatty acid transport protein 4	AMP-binding
100162928	54.90752849	53.17833705	53.43379903	44.34341665	44.63350603	45.30434359	-0.259814139	1.81E-06	1.15E-05	LOC100162928	NC_042495.1	8424779	8435472	-	3722	protein_coding	chromatin-remodeling complex ATPase chain Iswi	SNF2_N
100160457	72.4107241	81.36725178	76.35540498	57.55440834	44.55621808	52.42145687	-0.567328376	4.39E-09	3.87E-08	Obp7	NC_042496.1	31832121	31844198	+	817	protein_coding	odorant-binding protein 7%2C transcript variant X1	-
100165686	55.86927958	60.28816746	55.9472286	51.16406815	44.54141511	51.2544861	-0.221089989	0.009240322	0.027832104	LOC100165686	NC_042494.1	72567509	72570836	+	864	protein_coding	uncharacterized protein C20orf24 homolog	Rab5ip
100569768	62.57949379	66.1276924	62.26397318	41.17265061	44.20649114	43.06860547	-0.565349301	1.25E-22	3.23E-21	LOC100569768	NC_042494.1	26120280	26140370	-	4076	protein_coding	ichor%2C transcript variant X1	-
100165828	54.12773748	55.91067485	54.0117612	40.96966161	44.19002905	41.88889438	-0.361929406	1.10E-08	9.27E-08	LOC100165828	NC_042494.1	118827770	118857737	+	2008	protein_coding	chloride intracellular channel exc-4%2C transcript variant X1	-
100160573	14.58842907	19.98419738	18.45830386	57.48497249	44.01913208	44.4199879	1.469063812	1.06E-30	4.01E-29	LOC100160573	NC_042496.1	10564985	10570502	+	1129	protein_coding	uncharacterized protein LOC100160573	-
100163312	50.37334394	52.64040345	50.16898624	35.77928966	44.01832388	41.23229416	-0.333222813	7.93E-05	0.000391194	LOC100163312	NC_042495.1	116081912	116084368	-	1350	protein_coding	SEC14 cytosolic factor-like	-
100144788	34.84957911	34.60822189	35.49928617	41.88774303	43.99624956	44.60779245	0.321001449	2.09E-05	0.000113798	Catb-5880	NC_042495.1	58994845	59001931	-	1146	protein_coding	cathepsin B-5880	Peptidase_C1
100158819	66.14484439	72.37386673	75.81652474	41.69210696	43.93625763	42.89487036	-0.730211982	9.22E-20	1.99E-18	LOC100158819	NC_042495.1	108190987	108192401	-	873	protein_coding	replication protein A 14 kDa subunit-like	-
100168672	39.70281662	32.00322035	38.27748383	52.56695218	43.92464657	43.13448783	0.350940747	0.000577139	0.002394928	LOC100168672	NC_042493.1	70379186	70381391	+	1496	protein_coding	glycine-rich cell wall structural protein	-
100160766	35.33308549	40.80823997	37.39939691	44.2340215	43.8727774	46.00334149	0.247435951	0.005244735	0.017061069	LOC100160766	NC_042495.1	69166795	69171704	+	791	protein_coding	uncharacterized protein LOC100160766	-
100166421	52.77220181	54.63678004	52.14705219	43.87013918	43.853498	43.02836495	-0.28042229	1.14E-05	6.47E-05	LOC100166421	NC_042496.1	7918553	7921424	-	1635	protein_coding	interleukin enhancer-binding factor 2 homolog	-
100160383	47.55887679	50.57534702	46.09190483	41.88653403	43.81584292	42.55071281	-0.162631767	0.012669946	0.036550327	LOC100160383	NC_042494.1	58302342	58309550	-	2125	protein_coding	choline-phosphate cytidylyltransferase A%2C transcript variant X1	CTP_transf_2
100163013	46.31435888	46.251885	44.98094258	40.68471877	43.77919646	39.3765142	-0.144679862	0.01425457	0.040405023	LOC100163013	NC_042494.1	165405172	165452205	+	6750	protein_coding	myosin heavy chain 2%2C transcript variant X3	Myosin_tail_1
100160235	53.59818575	57.29055478	53.56629056	48.00335351	43.77688481	47.7924433	-0.229842174	0.001124373	0.004349984	LOC100160235	NC_042495.1	77952859	77960826	-	1568	protein_coding	trans-1%2C2-dihydrobenzene-1%2C2-diol dehydrogenase-like%2C transcript variant X3	GFO_IDH_MocA
100574241	26.19288932	29.75964086	30.45474006	47.4993813	43.77261872	49.36039994	0.710699016	4.80E-15	7.41E-14	ACYPI27127	NC_042495.1	107604866	107607089	-	1016	protein_coding	nogo-B receptor-like	-
100168596	50.86670985	50.46777849	48.28507401	44.50606278	43.62874896	42.56009637	-0.188453975	0.001597226	0.005948874	LOC100168596	NC_042494.1	153024082	153031710	-	2765	protein_coding	phospholipase A-2-activating protein	-
100162735	67.70597589	63.16164078	61.94329792	42.54241359	43.60499143	41.78788953	-0.585263938	5.14E-22	1.27E-20	LOC100162735	NC_042495.1	62079434	62102244	-	3689	protein_coding	piwi-like protein Siwi%2C transcript variant X3	Piwi
100160633	37.22124268	33.59408091	33.85947363	41.76634322	43.58917205	43.55353138	0.306617461	5.62E-06	3.32E-05	LOC100160633	NC_042494.1	56301871	56319128	-	2787	protein_coding	glutamate--cysteine ligase catalytic subunit	GCS
100159633	52.03050325	52.62049971	51.65431526	44.34015949	43.53770395	46.11382519	-0.215515542	0.000226418	0.00101685	LOC100159633	NC_042494.1	142566986	142580154	+	2682	protein_coding	cytoplasmic dynein 1 intermediate chain%2C transcript variant X1	-
100168434	46.69370891	52.96670674	51.80284659	44.83282055	43.40549262	43.4643953	-0.194330454	0.00316641	0.010893253	LOC100168434	NC_042496.1	7632578	7638119	+	3018	protein_coding	vacuole membrane protein 1%2C transcript variant X1	-
100161178	49.65940254	54.0652307	52.0722075	46.7719958	43.36096817	47.51071517	-0.171663616	0.014666182	0.041363666	LOC100161178	NC_042496.1	4585396	4607543	+	1633	protein_coding	probable low-specificity L-threonine aldolase 2%2C transcript variant X3	Beta_elim_lyase
100163585	13.25094822	15.51157747	14.58913324	40.29911159	43.07653301	42.23848662	1.542771569	7.11E-60	7.95E-58	LOC100163585	NC_042494.1	10227555	10231801	+	1062	protein_coding	uncharacterized LOC100163585	-
100313940	52.9110955	57.51191284	54.7689212	44.17121874	43.06826388	46.6943932	-0.29569795	3.25E-05	0.000172223	Pgam5	NC_042494.1	83282583	83287566	+	1364	protein_coding	phosphoglycerate mutase family member 5	-
100160187	33.33913099	35.56542874	35.17321269	42.77565911	43.04381515	40.55967336	0.287317839	3.17E-06	1.95E-05	LOC100160187	NC_042495.1	75773991	75823030	-	3220	protein_coding	uncharacterized protein ZK1073.1%2C transcript variant X1	Ndr
100169125	62.75707723	61.36694681	61.49194274	49.6805245	43.02666248	48.7841564	-0.384868386	3.73E-08	2.94E-07	LOC100169125	NC_042494.1	124091214	124204968	+	2471	protein_coding	alkaline phosphatase%2C transcript variant X2	-
100168844	62.18985003	47.98569084	53.9498222	44.05916119	43.01450273	43.40922792	-0.324834284	0.000258344	0.001148138	LOC100168844	NC_042494.1	83273508	83278632	+	2211	protein_coding	alpha-N-acetylgalactosaminidase%2C transcript variant X1	-
100169623	51.37425937	55.80879041	53.6086659	43.88454725	43.00753856	45.63895475	-0.271847435	8.43E-05	0.000413363	LOC100169623	NC_042494.1	160936927	160943024	+	1440	protein_coding	mRNA export factor	-
100166551	54.4755119	58.99019967	59.79143953	48.88169649	42.84829362	47.47603398	-0.308352871	7.88E-05	0.00038916	Snrpd1	NC_042494.1	4149430	4156169	+	1257	protein_coding	small nuclear ribonucleoprotein D1 polypeptide 16kDa	LSM
100162625	49.21322778	53.4277911	53.72162638	47.87736046	42.81104257	45.70503874	-0.189713495	0.012830626	0.036932821	Denr	NC_042494.1	154357667	154359386	-	1270	protein_coding	density-regulated protein	SUI1
100302319	30.39678471	33.11831514	34.08836046	40.83945435	42.7889091	38.10753624	0.326841897	0.000408678	0.001751142	Endos	NC_042494.1	112582578	112583393	+	816	protein_coding	endosulfine	-
100166732	56.28534482	61.51017832	58.82156236	44.69369042	42.78115689	43.35326483	-0.425801425	7.30E-11	7.75E-10	LOC100166732	NC_042494.1	36058091	36067260	+	1813	protein_coding	arginine kinase	-
100569963	23.13829932	21.61702576	20.54700408	41.15690945	42.68429074	40.71041795	0.937236717	1.87E-33	7.92E-32	LOC100569963	NC_042494.1	96519875	96524932	-	1636	lncRNA	uncharacterized LOC100569963	-
100161712	70.37681468	65.84983528	68.11464777	27.17983353	42.64803067	33.13621968	-0.982488917	2.37E-07	1.69E-06	LOC100161712	NC_042494.1	138504970	138548162	-	3964	protein_coding	uncharacterized LOC100161712	-
100159711	49.58561864	45.94036711	49.59198057	41.49255384	42.58310564	41.83985336	-0.19803045	0.004045662	0.013520104	LOC100159711	NC_042493.1	65568031	65574755	-	1595	protein_coding	CTD small phosphatase-like protein	NIF
novel.984	0.085639823	0.090859575	0	36.16229391	42.56912287	39.01442954	9.337848232	1.15E-19	2.44E-18	-	NW_021771228.1	583	1041	+	459	-	-	-
100160728	49.72547868	47.7864578	50.21093356	42.06516089	42.44118415	39.54967676	-0.244887249	0.000836657	0.003327436	LOC100160728	NC_042494.1	70155643	70172280	-	1200	protein_coding	zinc metalloproteinase nas-13	Astacin
103307621	48.87934814	51.60342149	48.11144659	43.73116816	42.40728834	42.93820314	-0.196336442	0.001338767	0.005077338	LOC103307621	NC_042494.1	154346094	154349615	-	2452	protein_coding	splicing factor 3B subunit 2	-
100168533	35.04331673	35.96451338	34.30720039	41.37810483	42.25825507	43.60364899	0.279393217	3.31E-05	0.000175023	LOC100168533	NC_042495.1	60560606	60566484	-	1751	protein_coding	maspardin	-
100166788	28.69452836	32.04199298	28.41908916	46.67083971	42.17130813	46.44716358	0.608552212	1.20E-16	2.12E-15	LOC100166788	NC_042494.1	165535565	165553301	-	2922	protein_coding	fatty acyl-CoA reductase wat%2C transcript variant X2	NAD_binding_4
100166111	65.29315779	55.03931214	59.68293975	51.6409596	42.15497643	46.39373782	-0.354269404	8.70E-05	0.000425468	LOC100166111	NC_042493.1	68073292	68078953	-	1717	protein_coding	cystathionine beta-synthase%2C transcript variant X1	PALP
100575640	16.69347946	18.7167549	18.41576474	39.95525544	42.14995257	41.64075924	1.208579851	1.21E-66	1.65E-64	LOC100575640	NC_042494.1	38468245	38669514	-	2861	protein_coding	frequenin-1%2C transcript variant X1	efhand
100164125	48.17319617	47.03361852	48.66003776	42.47387033	42.13552134	44.0973275	-0.153883276	0.005263465	0.017118468	LOC100164125	NC_042495.1	58807056	58822012	-	4359	protein_coding	GIGYF family protein CG11148	-
100169206	46.92330841	48.71467007	48.92486936	44.43357902	42.09926968	42.37449222	-0.158261334	0.007622672	0.023650521	LOC100169206	NC_042494.1	53402229	53406870	-	2927	protein_coding	raf homolog serine/threonine-protein kinase Raf	Pkinase_Tyr
100164352	14.60274084	16.04699194	14.85930667	40.64635108	42.01473988	40.63053788	1.444838096	9.32E-105	3.34E-102	LOC100164352	NC_042494.1	118890936	118904296	+	3311	protein_coding	gram negative bacteria binding protein 1	-
100569077	3.408266948	6.147201717	6.415756645	13.56549489	41.98552255	57.3651757	2.829948746	8.89E-06	5.13E-05	LOC100569077	NW_021765040.1	336	681	-	346	protein_coding	adhesive plaque matrix protein-like	-
100575143	46.06370821	49.80812374	46.99920794	41.58333681	41.98359215	41.97721013	-0.179547855	0.00301298	0.010426801	LOC100575143	NC_042494.1	37167663	37173074	-	2671	protein_coding	methionine--tRNA ligase%2C cytoplasmic	-
100165053	49.33278576	46.61464923	44.19094775	37.41076315	41.96584084	42.67108147	-0.193294402	0.011431148	0.033428956	LOC100165053	NC_042494.1	124126523	124147964	+	1996	protein_coding	membrane-bound alkaline phosphatase%2C transcript variant X2	-
100167849	47.46232155	46.22195522	46.15047582	41.14488071	41.94295591	43.44250983	-0.137656512	0.015783429	0.044073479	LOC100167849	NC_042494.1	56655913	56663907	+	3582	protein_coding	AP-1 complex subunit beta-1%2C transcript variant X2	-
100163422	28.54444401	28.78871198	28.55904341	35.12334478	41.90538033	35.42615178	0.395567176	8.32E-07	5.51E-06	LOC100163422	NC_042494.1	44290958	44321498	+	2454	protein_coding	zinc transporter 1%2C transcript variant X4	-
100572500	14.95315735	14.42232103	15.53622091	48.08020806	41.90533045	46.86151345	1.614689049	1.70E-63	2.08E-61	LOC100572500	NC_042494.1	165512865	165514143	+	1041	protein_coding	fatty acyl-CoA reductase wat	Sterile
100165363	27.64011111	27.48893265	26.84301207	39.96019975	41.8477889	41.23797074	0.592531725	4.65E-21	1.08E-19	LOC100165363	NC_042494.1	87200789	87226220	-	2567	protein_coding	acyl-CoA synthetase family member 2%2C mitochondrial%2C transcript variant X2	AMP-binding
100161937	23.67395197	28.32918295	26.2011941	45.58795679	41.82786857	43.6388412	0.752529615	4.87E-19	1.01E-17	LOC100161937	NC_042494.1	55802468	55818133	-	1506	protein_coding	torso-like protein	-
100569104	26.11719839	30.42611856	27.31551265	35.16902113	41.79779143	38.95660737	0.474209003	9.40E-08	7.10E-07	LOC100569104	NW_021770536.1	14161	20759	+	1627	protein_coding	angiotensin-converting enzyme%2C transcript variant X1	Peptidase_M2
100164299	45.27422354	47.12952645	45.67141582	38.39111922	41.78590518	38.9675541	-0.205784902	0.016085115	0.044802592	LOC100164299	NC_042495.1	86017721	86026374	+	738	protein_coding	uncharacterized LOC100164299	-
100161018	49.24111748	49.14146132	49.09976589	40.57246262	41.76730001	41.07801228	-0.250210072	6.53E-06	3.83E-05	LOC100161018	NC_042494.1	158253606	158263134	-	3174	protein_coding	catenin alpha%2C transcript variant X1	-
100165358	32.36626985	28.41203047	30.80110592	43.14064747	41.70001738	41.74916605	0.473530712	1.06E-11	1.22E-10	LOC100165358	NC_042495.1	67805087	67836017	+	2899	protein_coding	E3 ubiquitin-protein ligase RNF19A%2C transcript variant X1	IBR
100160895	20.31613704	20.95257738	19.63699221	37.08222712	41.63658477	42.33937647	0.997391972	5.49E-36	2.67E-34	LOC100160895	NC_042495.1	48850629	48853382	+	1871	protein_coding	cytochrome P450 6a2	p450
100163968	30.0116367	30.67994171	30.81376003	42.32560356	41.6040541	41.23694817	0.458910923	1.16E-17	2.19E-16	LOC100163968	NC_042495.1	95348604	95369349	+	5209	protein_coding	serine protease inhibitor 4%2C serpin-4-like%2C transcript variant X13	Serpin
100165747	50.39685699	49.42034714	51.17896989	44.32168038	41.59556814	42.25337214	-0.22953928	7.58E-05	0.000375527	LOC100165747	NC_042494.1	6905488	6915419	+	3616	protein_coding	delta-1-pyrroline-5-carboxylate dehydrogenase%2C mitochondrial%2C transcript variant X4	Aldedh
100161676	52.98770395	56.42687808	52.53110478	47.65492046	41.56941813	45.43731895	-0.259380715	0.002399195	0.008517575	LOC100161676	NC_042494.1	83436703	83440131	-	796	protein_coding	28S ribosomal protein S16-like	-
100159960	50.48192954	58.0825769	53.01502673	47.66973295	41.56853087	45.7837387	-0.25184668	0.002305381	0.008232683	LOC100159960	NC_042494.1	160164704	160166548	-	1263	protein_coding	protein Peter pan	-
100168401	47.43799022	48.42875631	48.51756639	45.51264975	41.53320179	40.31626681	-0.17390794	0.007247535	0.022602166	LOC100168401	NC_042496.1	8673690	8702124	-	3467	protein_coding	uncharacterized LOC100168401	Zona_pellucida
100160088	27.86021066	30.88377602	27.55360334	56.69971371	41.48247466	48.86100802	0.776029887	4.13E-15	6.45E-14	LOC100160088	NC_042494.1	64745499	64757354	+	3461	protein_coding	peroxidase%2C transcript variant X1	An_peroxidase
100160855	50.77213373	54.46878493	51.32025629	41.68401567	41.45452689	43.64047613	-0.297576083	3.34E-06	2.05E-05	LOC100160855	NC_042494.1	66574627	66577707	+	2078	protein_coding	ubiquitin-like modifier-activating enzyme 5	-
100569444	21.64446837	25.0597155	24.0076284	52.4461374	41.37777838	46.48722712	0.996337633	1.32E-23	3.57E-22	LOC100569444	NC_042495.1	58827645	58832240	+	1353	protein_coding	guanine nucleotide-binding protein-like 3%2C transcript variant X2	-
100169102	45.21811269	46.70475584	44.26048767	39.67611995	41.32558262	39.53952583	-0.169262188	0.005006043	0.016368983	LOC100169102	NC_042494.1	127972542	127977086	-	2694	protein_coding	zinc finger protein 2 homolog	zf-C2H2
100169287	27.07311684	29.41337097	30.91606211	38.66831734	41.30504438	37.05164512	0.429081542	4.15E-07	2.85E-06	LOC100169287	NC_042494.1	37843927	37847515	+	1269	protein_coding	uncharacterized LOC100169287%2C transcript variant X1	-
100164217	31.8035821	32.34908873	32.92717687	46.03046726	41.26961962	44.45925036	0.447731829	2.05E-10	2.08E-09	LOC100164217	NC_042495.1	81098349	81108949	-	2006	protein_coding	putative inorganic phosphate cotransporter	MFS_1
100169156	35.57583379	34.84635693	32.63292058	37.82700082	41.22220629	38.13110433	0.191568082	0.009672116	0.028928336	LOC100169156	NC_042494.1	20039697	20065159	-	1727	protein_coding	uncharacterized LOC100169156	-
100159523	36.69357686	36.78018387	36.13517739	43.96266719	41.20420722	41.38817836	0.21421137	0.000492682	0.002077799	LOC100159523	NC_042494.1	166558575	166666694	+	2871	protein_coding	cAMP-dependent protein kinase type I regulatory subunit%2C transcript variant X1	cNMP_binding
100168253	32.56708481	31.4709759	33.34977395	40.41795112	41.13167635	46.04708764	0.396466485	2.26E-06	1.42E-05	LOC100168253	NC_042495.1	115623091	115625077	+	1137	protein_coding	charged multivesicular body protein 6-A	ESCRT-III
100160404	158.3894942	120.4335127	135.4035601	18.10075531	41.02908323	29.90598879	-2.212295512	9.09E-11	9.56E-10	LOC100160404	NC_042494.1	125475039	125485991	-	1702	protein_coding	vacuolar protein-sorting-associated protein 36	-
100568670	48.63739076	48.28137609	51.7789481	35.94061922	41.02718058	38.75163887	-0.354850856	1.90E-07	1.37E-06	LOC100568670	NC_042494.1	100383801	100390406	+	3253	protein_coding	plexin A3	TIG
100159564	20.83895798	19.48586475	19.54528466	37.0284805	41.01163105	37.82707901	0.958983551	1.98E-49	1.60E-47	LOC100159564	NC_042496.1	4029303	4042771	-	6089	protein_coding	glycogen debranching enzyme%2C transcript variant X1	-
100301633	11.61972481	18.37164887	13.97961494	47.34577333	41.00659146	39.87796506	1.552459103	5.16E-32	2.06E-30	LOC100301633	NC_042494.1	33133750	33144990	+	1387	protein_coding	short-chain dehydrogenase/reductase-like	adh_short
100161007	29.4627191	35.24552368	35.6014785	39.24302195	40.93345502	40.73402776	0.278077525	0.011228623	0.032890758	LOC100161007	NC_042496.1	40790152	40790674	-	523	protein_coding	formation of mitochondrial complexes 1 homolog-like	-
100160902	46.00525871	48.431924	44.85077372	39.71405887	40.92595415	39.56596188	-0.205780001	0.000575563	0.002389647	LOC100160902	NC_042495.1	102649124	102652699	-	3205	protein_coding	cullin-1%2C transcript variant X2	Cullin
100168942	13.64433479	19.47360985	17.26946606	34.07400575	40.89687373	38.09279445	1.174586096	3.22E-21	7.55E-20	LOC100168942	NC_042494.1	158998395	159004548	+	968	protein_coding	TLP-PA-domain protein	Thaumatin
100168691	27.78921703	30.67992962	30.35033828	39.35018103	40.84039879	41.40902993	0.460692909	3.09E-09	2.79E-08	LOC100168691	NC_042495.1	54784803	54789232	+	1324	protein_coding	probable galactose-1-phosphate uridylyltransferase	-
100161031	32.81186911	36.48752457	35.17086603	42.1196976	40.8019928	43.67272535	0.284402987	0.000212424	0.000960291	LOC100161031	NC_042495.1	76642988	76644783	-	1319	protein_coding	GTP:AMP phosphotransferase AK3%2C mitochondrial%2C transcript variant X2	ADK
100160622	44.84664183	52.6491079	48.05632489	41.72667193	40.79472771	40.04598707	-0.240531346	0.003364027	0.011502872	LOC100160622	NC_042494.1	43046442	43047877	+	1086	protein_coding	tRNA (guanine-N(7)-)-methyltransferase%2C transcript variant X3	-
100167336	31.74262779	32.63165356	29.65637901	41.56829236	40.6388531	39.954754	0.38419024	5.08E-10	4.98E-09	LOC100167336	NC_042494.1	92084071	92174481	-	4068	protein_coding	synaptic vesicle glycoprotein 2B%2C transcript variant X4	Sugar_tr
100165738	45.53066258	47.03365007	48.47767612	38.34288198	40.58562055	42.54386814	-0.208467496	0.00576084	0.018544945	LOC100165738	NC_042494.1	94930526	94932551	+	1213	protein_coding	signal recognition particle receptor subunit beta	-
100160060	32.55891638	27.95198809	27.85175724	39.80061956	40.56496446	39.6884307	0.448221065	1.57E-09	1.45E-08	LOC100160060	NC_042495.1	81496342	81622767	-	3733	protein_coding	protein gustavus%2C transcript variant X5	SPRY
100168234	35.52028969	32.11917893	33.79593286	39.00094508	40.47150525	40.30272972	0.246198371	0.000117382	0.000560003	LOC100168234	NC_042494.1	70815128	70868897	-	3559	protein_coding	nuclear receptor-binding protein homolog	Pkinase_Tyr
100168720	35.73880899	35.47014107	33.30702252	38.38091258	40.43943913	38.14393945	0.168723285	0.014346538	0.040629209	LOC100168720	NC_042494.1	45239416	45243167	-	1960	protein_coding	methylcrotonoyl-CoA carboxylase beta chain%2C mitochondrial	Carboxyl_trans
100160514	33.57146564	35.53790736	32.9450827	38.2911815	40.3920072	38.87864761	0.210775464	0.003329363	0.011404116	LOC100160514	NC_042496.1	35138375	35141700	-	1569	protein_coding	lipoyl synthase%2C mitochondrial	Radical_SAM
100161721	30.34512596	32.69770471	32.65674206	37.54732916	40.32957432	41.57399151	0.327020046	1.02E-05	5.82E-05	LOC100161721	NC_042496.1	5981847	5996988	-	1741	protein_coding	uncharacterized LOC100161721%2C transcript variant X1	-
100167400	60.10142967	73.39147354	65.4463834	41.54293626	40.12481146	40.61341512	-0.694721114	1.08E-16	1.91E-15	LOC100167400	NC_042494.1	133455358	133459740	+	1174	protein_coding	uncharacterized LOC100167400	-
100168082	49.89936293	57.33068402	53.05231207	41.11899621	40.10789976	43.80344751	-0.351245275	3.24E-06	1.99E-05	Snrnp40	NC_042495.1	71313019	71316266	-	1596	protein_coding	small nuclear ribonucleoprotein 40kDa (U5)%2C transcript variant X2	WD40
100165402	51.268902	49.09877819	49.87843487	43.44943914	39.92989303	41.33570544	-0.261973372	2.21E-05	0.000119766	LOC100165402	NC_042494.1	134486103	134527279	+	3119	protein_coding	uncharacterized LOC100165402	PAN_1
100165302	54.62036765	59.75726494	53.81277077	31.77745577	39.91929164	36.45967709	-0.630246177	6.41E-13	8.34E-12	LOC100165302	NC_042494.1	58736590	58745190	-	1661	protein_coding	uncharacterized LOC100165302	-
100159447	30.82412052	32.46544512	29.72209889	41.61707561	39.91750833	39.797136	0.390136561	1.14E-08	9.63E-08	LOC100159447	NC_042494.1	23332204	23345758	+	2108	protein_coding	peroxidase%2C transcript variant X2	An_peroxidase
100159540	60.34451045	59.71164622	57.71930435	37.80535815	39.91744882	37.04712847	-0.624646797	4.84E-21	1.13E-19	LOC100159540	NC_042493.1	43006205	43020437	+	1693	protein_coding	ras-related protein Rab-7L1	Ras
100169371	27.51325328	29.7889607	30.70073543	34.24599137	39.91517941	43.37918256	0.424684315	8.71E-06	5.03E-05	LOC100169371	NC_042495.1	111151960	111162062	+	1393	protein_coding	proline synthase co-transcribed bacterial homolog protein-like%2C transcript variant X2	Ala_racemase_N
100161224	31.10183472	32.35004587	31.26107776	36.31945376	39.90706648	38.08635478	0.278172653	7.92E-05	0.000390687	LOC100161224	NC_042495.1	41732166	41756047	-	1868	protein_coding	UDP-glucuronosyltransferase 2A1	UDPGT
100161594	32.33535888	32.93711223	30.97427719	42.31945475	39.79497894	42.6873201	0.381247608	1.41E-07	1.04E-06	LOC100161594	NC_042494.1	82373022	82388467	-	1584	protein_coding	short-chain specific acyl-CoA dehydrogenase%2C mitochondrial	-
100164165	45.41590011	46.82576514	44.95237989	42.31653516	39.75517726	41.22268264	-0.147270676	0.010843874	0.031912667	LOC100164165	NC_042494.1	122958516	122967460	-	3746	protein_coding	serine/threonine-protein phosphatase PP1-beta catalytic subunit	Metallophos
100160970	33.61008335	31.24139287	32.55657542	35.09515391	39.73696747	35.89928536	0.19152056	0.006312111	0.020033429	LOC100160970	NC_042494.1	131773070	131780139	+	3380	protein_coding	RAC serine/threonine-protein kinase%2C transcript variant X3	Pkinase
100169209	66.53927193	66.36780742	63.05554894	34.8712842	39.73068897	38.36960604	-0.788203017	1.22E-25	3.63E-24	LOC100169209	NC_042494.1	23515279	23529539	+	1253	protein_coding	RNA-binding protein lin-28-like	CSD
100167082	28.22466061	23.56117798	26.32415661	35.10685001	39.69614043	38.73282285	0.545682242	2.92E-10	2.94E-09	LOC100167082	NC_042495.1	64367272	64420142	+	1986	protein_coding	solute carrier family 22 member 5	Sugar_tr
100167462	61.90287113	67.23537319	65.55013991	30.16213929	39.68409194	38.62726893	-0.837066631	1.09E-18	2.20E-17	LOC100167462	NC_042494.1	43096232	43116613	+	1658	protein_coding	estradiol 17-beta-dehydrogenase 11%2C transcript variant X1	adh_short
100159841	50.45425462	45.71999144	47.35576929	41.21963476	39.67989311	42.31192185	-0.21381615	0.001188928	0.004576796	LOC100159841	NC_042496.1	31890593	31946552	-	2825	protein_coding	4-coumarate--CoA ligase%2C transcript variant X1	AMP-binding
100164097	104.1684412	88.35581408	96.84646056	19.13075353	39.64672128	28.79939263	-1.718351215	1.02E-08	8.66E-08	LOC100164097	NC_042494.1	160098139	160113564	+	4443	protein_coding	uncharacterized LOC100164097%2C transcript variant X2	Trypsin
100169538	33.49457636	35.4368099	33.41122728	40.14515975	39.61688626	40.40308061	0.23843668	8.19E-05	0.00040269	LOC100169538	NC_042494.1	127150229	127179243	+	2941	protein_coding	ecotropic viral integration site 5 ortholog%2C transcript variant X1	TBC
100169140	44.15515854	46.38760466	47.77792575	39.23794602	39.60828408	40.02466287	-0.211418761	0.000565148	0.002349498	LOC100169140	NC_042495.1	2941446	2953013	-	2636	protein_coding	uncharacterized LOC100169140%2C transcript variant X2	-
100163629	18.49751094	17.65621161	17.5419226	30.83892365	39.58304663	34.05247714	0.966651983	2.50E-27	8.05E-26	LOC100163629	NC_042495.1	75831235	75837807	-	3347	protein_coding	ATP-dependent RNA helicase DRS1%2C transcript variant X3	DEAD
100166700	47.16409229	51.81626216	47.28863782	43.57897258	39.57307554	40.89737473	-0.230689081	0.000839356	0.003336487	LOC100166700	NC_042493.1	34232412	34243089	+	2487	protein_coding	pumilio homolog 3	-
100160056	32.74051946	28.51229096	29.31603532	40.4200573	39.5508984	40.56309785	0.418396014	1.39E-08	1.16E-07	LOC100160056	NC_042496.1	31436074	31438425	-	2352	protein_coding	lysosome membrane protein 2	-
100160585	45.11393872	51.97727214	46.04374805	41.2279483	39.53678521	42.66524088	-0.206703115	0.006118408	0.019497095	LOC100160585	NC_042494.1	25447869	25451774	-	1835	protein_coding	actin-related protein 3	Actin
103310638	41.99369784	28.42973763	29.83072843	55.43556671	39.51714736	48.38562746	0.520852299	0.00046185	0.001955613	LOC103310638	NC_042494.1	62614737	62615591	+	732	protein_coding	cuticle protein 7-like	Chitin_bind_4
100163602	29.75485462	32.43561695	29.12953719	36.76987453	39.44827521	37.699181	0.325771759	7.81E-07	5.19E-06	LOC100163602	NC_042494.1	11882144	11932216	-	3703	protein_coding	receptor-type tyrosine-protein phosphatase N2%2C transcript variant X5	Y_phosphatase
100160888	44.60331716	49.16597038	47.7993911	42.29229694	39.41364414	42.57718787	-0.180644473	0.013732771	0.03915813	LOC100160888	NC_042496.1	9109286	9111490	-	1470	protein_coding	COP9 signalosome complex subunit 4	-
100162206	148.3294717	130.9908834	137.5239475	9.282090478	39.32694541	25.22490574	-2.491573898	9.56E-06	5.49E-05	LOC100162206	NC_042494.1	36342819	36348018	+	2441	protein_coding	probable cytochrome P450 303a1	p450
100160385	32.56742407	33.26619546	30.52666693	36.31904815	39.28091327	37.72835527	0.24053438	0.000135388	0.000637996	LOC100160385	NC_042495.1	58016551	58052615	+	4280	protein_coding	protein draper%2C transcript variant X2	-
100164075	47.36602646	52.57539794	55.01857274	46.25915583	39.25560831	42.12156592	-0.271989171	0.003513806	0.011963166	LOC100164075	NC_042495.1	38238611	38239690	-	844	protein_coding	ribosomal RNA small subunit methyltransferase NEP1	-
100162229	28.56790803	27.94912514	29.48180586	48.7406726	39.14575803	46.88867563	0.655180167	3.78E-12	4.54E-11	LOC100162229	NC_042495.1	75872376	75885768	+	1237	protein_coding	farnesol dehydrogenase	adh_short
100161540	46.45788497	49.89832116	48.4032187	36.94662002	39.14356488	38.01718447	-0.336243519	1.93E-08	1.58E-07	LOC100161540	NC_042495.1	106832328	106836044	-	3288	protein_coding	alanine--tRNA ligase%2C cytoplasmic	-
100302406	27.09697527	27.29194488	28.25891771	39.29686292	38.98892082	40.3237192	0.528287312	8.30E-14	1.16E-12	LOC100302406	NC_042493.1	87485552	87488300	-	1632	protein_coding	uncharacterized LOC100302406%2C transcript variant X1	-
100168801	31.4033273	33.22095747	33.95114275	37.38279341	38.98105126	37.54128916	0.215909765	0.001244441	0.004756189	LOC100168801	NC_042495.1	65393017	65399335	-	2163	protein_coding	src substrate protein p85%2C transcript variant X2	-
100161375	33.06763352	33.08616623	33.04112033	37.03484532	38.96541228	39.32765743	0.224097089	0.00072237	0.002920767	LOC100161375	NC_042494.1	76574537	76674105	-	1984	protein_coding	calexcitin-2%2C transcript variant X2	-
100164830	46.10913175	48.45488746	46.93590947	36.65786891	38.9415054	40.03198754	-0.284484884	4.99E-05	0.000255846	LOC100164830	NC_042493.1	82044458	82047972	+	1526	protein_coding	CCR4-NOT transcription complex subunit 9	-
100159431	26.37478276	27.24123188	27.34546411	40.07693754	38.90947373	37.57160508	0.53288462	2.78E-18	5.45E-17	LOC100159431	NC_042496.1	595906	599994	+	3489	protein_coding	uncharacterized protein DDB_G0271670%2C transcript variant X1	-
100158963	46.1711659	49.96750156	50.65479101	37.23026446	38.87202655	37.61087282	-0.36110983	1.51E-08	1.25E-07	LOC100158963	NC_042495.1	13330843	13348247	-	2675	protein_coding	uncharacterized LOC100158963	-
100168459	43.77482776	44.52665705	42.72948837	36.98392594	38.83928006	36.71935684	-0.212700489	0.000655824	0.002679227	LOC100168459	NC_042496.1	15843108	15847504	+	2394	protein_coding	1-acyl-sn-glycerol-3-phosphate acyltransferase alpha%2C transcript variant X1	Acyltransferase
100161493	44.86456232	50.7677876	49.04134377	39.39273019	38.69394456	42.41377793	-0.256529374	0.001219841	0.004670087	Dohh	NC_042494.1	110385653	110387156	+	1224	protein_coding	deoxyhypusine hydroxylase	-
100159994	44.34613553	50.72884779	48.19006007	40.51823676	38.66915664	39.93762461	-0.258823277	0.000588749	0.002432867	LOC100159994	NC_042494.1	58060640	58062640	+	1428	protein_coding	bystin	-
100169235	59.65910293	52.7329781	52.8761957	34.27407705	38.59197659	34.78330009	-0.612066062	2.40E-17	4.45E-16	LOC100169235	NC_042494.1	39797591	39860159	-	6353	protein_coding	uncharacterized LOC100169235	Trypsin
100166941	23.38919788	22.90184059	23.1185539	40.23508401	38.58668501	38.88391773	0.768750069	1.69E-44	1.16E-42	LOC100166941	NC_042494.1	72233204	72271182	+	6257	protein_coding	ecdysone-induced protein 75%2C transcript variant X1	zf-C4
100166654	30.81582252	32.90071141	31.69869886	36.1994235	38.56149501	36.28263662	0.225974481	0.006370762	0.02020332	n-syb	NC_042495.1	7790004	7800373	+	1009	protein_coding	n-synaptobrevin	-
100164111	47.53955697	40.0109594	49.90239723	38.93334594	38.54156806	38.84589805	-0.233837644	0.017665448	0.048580753	LOC100164111	NW_021771456.1	5	979	-	788	protein_coding	coatomer subunit delta	-
100160778	53.20350482	60.02093672	55.79084809	39.12165856	38.50898854	38.63036772	-0.532643694	1.72E-16	3.00E-15	LOC100160778	NC_042494.1	59955207	59963495	-	2730	protein_coding	nucleolar transcription factor 1-A	HMG_box
100164082	48.36746897	51.02942953	48.78317131	38.65046723	38.49500875	38.76292254	-0.347472461	1.48E-08	1.22E-07	LOC100164082	NC_042494.1	150228047	150233045	-	2187	protein_coding	calcium uptake protein 1 homolog%2C mitochondrial%2C transcript variant 1	-
100161595	43.48868619	44.3184214	44.09076152	36.0588571	38.43831477	33.98137053	-0.274907479	0.0002339	0.001048363	Rhogdi	NC_042495.1	8209658	8214330	-	1420	protein_coding	Rho GDP dissociation inhibitor	-
100162082	50.14531193	52.87213605	47.88843716	39.07325936	38.41165824	38.18256537	-0.377083829	5.29E-07	3.59E-06	LOC100162082	NC_042495.1	53264922	53266316	+	1139	protein_coding	transforming protein Rho-like	Ras
100160598	29.73644791	31.56929947	30.34620144	38.88932147	38.37030386	36.31361944	0.316446854	1.87E-07	1.35E-06	LOC100160598	NC_042495.1	115218804	115232037	+	4086	protein_coding	uncharacterized LOC100160598%2C transcript variant X2	-
100164781	33.85238016	33.81189453	32.84586627	38.02705485	38.24712942	40.0646272	0.217532162	0.000339059	0.001472833	LOC100164781	NC_042493.1	3372651	3432294	+	3033	protein_coding	long-chain fatty acid transport protein 4	AMP-binding
100162147	44.04802305	46.06725448	45.66455883	40.32433006	38.22139186	38.47670839	-0.207302915	0.005327616	0.017299066	LOC100162147	NC_042493.1	85636113	85638136	-	1128	protein_coding	glucosamine-6-phosphate N-acetyltransferase-like	Acetyltransf_1
100144794	29.33886874	27.33575218	28.48315478	50.36257104	38.19322856	44.94983441	0.655413369	8.48E-11	8.94E-10	Catb-1874	NC_042495.1	59015372	59019649	-	1309	protein_coding	cathepsin B-1874	Peptidase_C1
100169555	27.04605154	25.52789895	26.42932902	45.89053613	38.19203636	42.50657474	0.686952017	9.22E-20	1.99E-18	LOC100169555	NC_042495.1	64232688	64282196	-	4491	protein_coding	sodium- and chloride-dependent betaine transporter%2C transcript variant X2	SNF
100162489	27.52095015	26.74676771	26.26043983	41.78415095	38.16395279	37.8642095	0.555711166	2.16E-20	4.85E-19	LOC100162489	NC_042494.1	71296467	71367128	-	12095	protein_coding	mucin-17%2C transcript variant X2	-
100166226	34.07615006	32.71040864	32.61354252	39.18743503	38.12103345	37.75896147	0.217773569	0.000164804	0.000760934	LOC100166226	NC_042495.1	60142771	60176463	-	4252	protein_coding	serine/threonine-protein kinase N%2C transcript variant X1	Pkinase
100162939	67.53120689	72.06258407	70.36438617	19.83781261	38.09239817	30.6895178	-1.23796507	1.62E-06	1.04E-05	LOC100162939	NC_042494.1	96558712	96586209	-	2209	protein_coding	phospholipase B1%2C membrane-associated	Lipase_GDSL
100161124	54.92994222	59.58210819	56.28663188	38.21677148	38.07370305	38.15619556	-0.570618357	1.42E-21	3.43E-20	LOC100161124	NC_042496.1	27547665	27575379	+	2846	protein_coding	serine protease inhibitor dipetalogastin	-
100159074	31.61617805	29.13605198	28.50282973	36.86624149	38.07098676	35.00111436	0.306673507	0.000453139	0.001921822	LOC100159074	NC_042494.1	101097481	101098662	+	1022	protein_coding	U-scoloptoxin(05)-Sm1a	-
100169469	47.68358268	44.33966245	46.22571978	32.93250084	38.01820384	36.96733742	-0.350897346	3.62E-06	2.20E-05	LOC100169469	NC_042494.1	49844094	49871974	+	1915	protein_coding	short-chain dehydrogenase/reductase family 16C member 6%2C transcript variant X2	adh_short
novel.557	43.99686984	42.16478661	42.51419563	39.24291347	38.01487418	37.42769867	-0.159333212	0.003101616	0.010705359	-	NC_042495.1	90369951	90377471	+	7521	-	PF12762:ISXO2-like transposase domain	-
100165124	48.75433856	65.45994511	50.64000908	47.61064424	37.98441273	47.94544353	-0.296535739	0.009654516	0.02888665	LOC100165124	NC_042495.1	1673423	1677044	+	1494	protein_coding	macrophage migration inhibitory factor homolog	MIF
100162770	13.58947251	18.65826681	17.5844916	45.95192815	37.96978222	43.75645857	1.366252423	6.39E-31	2.44E-29	LOC100162770	NC_042496.1	2806226	2812414	-	1131	protein_coding	uncharacterized LOC100162770	-
100168416	33.15748147	34.06094671	36.51439406	41.0232303	37.92389306	43.39832328	0.2454954	0.00583947	0.01875215	LOC100168416	NC_042494.1	66553324	66554322	+	933	protein_coding	39S ribosomal protein L42%2C mitochondrial	-
100169261	33.52041142	29.84304051	32.30387317	34.81567814	37.89262346	37.30115345	0.207914861	0.005954865	0.019060641	LOC100169261	NC_042494.1	45684331	45693546	+	1983	protein_coding	UDP-glucuronosyltransferase 1-7%2C transcript variant X1	UDPGT
100160811	43.04590786	43.65623551	41.67661843	38.95970038	37.88367017	38.83845325	-0.14354674	0.010333244	0.030586791	LOC100160811	NC_042494.1	152641705	152721787	-	4060	protein_coding	uncharacterized LOC100160811%2C transcript variant X2	MBD
100167578	29.4815091	31.4287857	33.10611004	40.25922276	37.8817588	41.13867579	0.351175564	0.000110436	0.000529912	Bloc1s2	NC_042494.1	140378234	140380197	-	832	protein_coding	biogenesis of lysosomal organelles complex-1%2C subunit 2	-
100168705	25.3315974	24.0299122	23.09805411	31.92944818	37.87146293	34.22590689	0.527902747	4.54E-11	4.93E-10	LOC100168705	NC_042495.1	1195669	1206012	-	2638	protein_coding	transmembrane protein 205	-
100167250	41.40825214	44.76741587	41.38780795	37.2409795	37.86024661	35.01110344	-0.205231375	0.001931865	0.007040664	LOC100167250	NC_042493.1	85191641	85196363	+	2696	protein_coding	putative fatty acyl-CoA reductase CG8306%2C transcript variant X1	NAD_binding_4
100169495	40.49848172	42.93490896	42.03988629	35.98310126	37.7406866	36.95899803	-0.173920788	0.004728431	0.015545001	LOC100169495	NC_042495.1	22363790	22369682	+	2610	protein_coding	hepatoma-derived growth factor-related protein 2	PWWP
100166185	29.03325223	31.97348449	30.59946089	40.19929955	37.70728094	38.07169041	0.347805614	0.000655839	0.002679227	Cpx	NC_042495.1	95511682	95660301	-	570	protein_coding	complexin%2C transcript variant 1	-
novel.439	26.18010399	26.10825494	26.26549661	35.89536012	37.69775777	38.3670808	0.517947285	1.39E-15	2.28E-14	-	NC_042494.1	115314733	115317283	-	2551	-	PF04089:BRICHOS domain	-
100164453	20.45686635	19.14939046	18.86465673	38.9549556	37.66605938	38.3986242	0.982180346	2.90E-46	2.12E-44	LOC100164453	NC_042494.1	108807302	108812649	-	2596	protein_coding	inositol polyphosphate 5-phosphatase K	-
100159541	25.72931703	29.26656192	28.4572539	32.5966076	37.6559253	33.90194032	0.326975697	2.11E-05	0.000114766	LOC100159541	NC_042495.1	92580377	92593719	-	3410	protein_coding	acyl-CoA synthetase short-chain family member 3%2C mitochondrial	AMP-binding
100165595	34.06162132	32.65000402	33.64581961	36.90533365	37.6537337	36.26202396	0.149821309	0.013141065	0.037651723	LOC100165595	NC_042494.1	152744556	152750941	-	3109	protein_coding	interferon regulatory factor 2-binding protein-like B%2C transcript variant X1	-
100165283	44.65238457	47.9849772	45.27789222	37.02731472	37.63179319	37.74327834	-0.28818201	1.86E-07	1.35E-06	LOC100165283	NC_042493.1	29672211	29686008	-	5392	protein_coding	bifunctional glutamate/proline--tRNA ligase%2C transcript variant X2	tRNA-synt_2b
100168620	30.3149526	28.19016079	28.64417395	35.78309052	37.59715123	35.84427907	0.332163052	2.61E-07	1.84E-06	LOC100168620	NC_042495.1	60608047	60658138	+	3160	protein_coding	putative ferric-chelate reductase 1 homolog	-
100165115	23.30219949	20.66704894	21.85731514	37.50300955	37.57161843	33.57032371	0.729322861	1.87E-19	3.97E-18	LOC100165115	NC_042494.1	130814440	130821497	+	2139	protein_coding	uncharacterized LOC100165115%2C transcript variant X3	-
100164854	47.94467641	49.65368401	47.81536065	38.40268281	37.49523676	39.32245659	-0.328979295	1.07E-08	9.03E-08	LOC100164854	NC_042495.1	74138273	74143858	-	3300	protein_coding	116 kDa U5 small nuclear ribonucleoprotein component	GTP_EFTU
novel.778	0	0	0.076784912	27.84375307	37.47298401	32.22086324	10.42718305	3.29E-24	9.18E-23	-	NW_021759332.1	14	1193	+	1180	-	-	-
100162019	28.7809819	30.08169153	27.02130006	41.08865378	37.39581422	41.10536871	0.484122406	3.29E-11	3.62E-10	LOC100162019	NC_042495.1	30407072	30423397	+	2483	protein_coding	myrosinase 1%2C transcript variant X1	Glyco_hydro_1
100159318	44.91758226	52.22904101	46.29143204	27.62457136	37.34232471	32.45642268	-0.55119588	1.58E-08	1.31E-07	pdp1	NC_042494.1	115026094	115041291	+	3392	protein_coding	par domain protein 1%2C transcript variant X1	bZIP_2
100158771	28.53744186	26.70058876	29.96839361	34.3062866	37.32790478	33.61379846	0.311967847	0.000133767	0.000630924	LOC100158771	NC_042493.1	4198565	4214031	+	1551	protein_coding	glycogen [starch] synthase%2C transcript variant X5	-
100161434	26.5105043	30.09637585	24.59405099	38.4833086	37.32135668	39.26716686	0.509291996	7.52E-09	6.47E-08	LOC100161434	NC_042495.1	84471989	84483281	+	1376	protein_coding	androgen-dependent TFPI-regulating protein-like%2C transcript variant X1	-
100161624	43.95302612	40.85652877	40.48382575	36.34043828	37.31247638	34.15683655	-0.210269911	0.001056841	0.004114951	LOC100161624	NC_042495.1	92693908	92705480	+	4672	protein_coding	coronin-1C-A	-
100165703	44.29448291	48.03855046	47.8432281	32.4493727	37.27395158	35.10347651	-0.41207561	4.17E-08	3.28E-07	LOC100165703	NC_042494.1	129032653	129060398	+	1837	protein_coding	protein FAM107B%2C transcript variant X1	-
100574047	31.41629299	35.7293324	31.65918248	40.63181839	37.21875886	37.74496858	0.233474301	0.008157676	0.025049368	LOC100574047	NC_042496.1	11383930	11386255	+	1026	protein_coding	HIG1 domain family member 1C	-
100163059	32.75250204	31.42143877	31.82665292	36.66200766	37.20151127	37.06936273	0.215142322	0.000448927	0.001906086	LOC100163059	NC_042494.1	122852041	122860021	+	2770	protein_coding	phosphatidate cytidylyltransferase%2C photoreceptor-specific%2C transcript variant X4	-
107885159	20.96603912	11.91879084	16.89722652	39.79897698	37.08127818	36.86698814	1.197805115	2.43E-07	1.73E-06	LOC107885159	NC_042494.1	167604093	167607261	-	1858	protein_coding	uncharacterized LOC107885159	-
100168886	21.69932364	18.2849552	18.5186853	35.62585535	36.98585983	37.11605613	0.913257328	5.94E-33	2.46E-31	LOC100168886	NC_042494.1	147161096	147248347	+	4719	protein_coding	low-density lipoprotein receptor%2C transcript variant X2	Ldl_recept_a
100161737	50.11729086	53.15391207	51.41402166	36.87705382	36.96729708	36.00296517	-0.486786489	1.85E-15	3.00E-14	LOC100161737	NC_042495.1	74222956	74229303	-	2313	protein_coding	uncharacterized LOC100161737	-
100161989	42.85031712	44.42036281	42.8581047	37.85456245	36.94439497	36.96605326	-0.212595613	0.000582223	0.002412298	LOC100161989	NC_042495.1	102451166	102455421	-	2242	protein_coding	ufm1-specific protease 2	DUF1671
100169637	27.59077098	28.80189182	29.37706826	36.00568242	36.90216059	37.29750795	0.368939786	2.12E-07	1.52E-06	LOC100169637	NC_042496.1	2945835	2948613	-	1684	protein_coding	syntenin-1	PDZ
100169330	40.18005345	46.36121011	42.55069298	37.97528568	36.82698674	37.40803935	-0.194906175	0.014471721	0.040924957	LOC100169330	NC_042494.1	164710987	164712812	-	1218	protein_coding	Zinc finger%2C CCHC domain containing 9-like	zf-CCHC
100161459	28.62025153	27.22510184	26.62193284	41.13545799	36.79712829	39.44890694	0.515373224	1.57E-08	1.30E-07	LOC100161459	NC_042495.1	83069853	83075083	-	890	protein_coding	glutathione S-transferase-like	GST_N
100302479	0.207616261	0.146846989	0.079758975	33.50468805	36.79309507	30.20738833	7.83247415	2.02E-38	1.10E-36	LOC100302479	NC_042495.1	29710561	29722309	-	568	protein_coding	uncharacterized LOC100302479	-
100162227	30.74639232	32.84561374	35.06810462	39.25146698	36.74166933	41.64600456	0.26148232	0.002805442	0.009779378	LOC100162227	NC_042494.1	159135738	159140156	-	1111	protein_coding	uncharacterized LOC100162227	-
100168570	23.77869559	26.0383299	23.61981467	38.99408855	36.72683681	36.48005751	0.618397784	4.31E-15	6.70E-14	LOC100168570	NC_042494.1	94856756	94867862	-	1544	protein_coding	glucosamine-6-phosphate isomerase	-
100574511	16.00459007	17.3189943	16.91732914	34.57264415	36.71177912	35.8272186	1.099477783	4.06E-54	3.81E-52	LOC100574511	NC_042494.1	135795215	135798854	-	2461	protein_coding	uncharacterized PE-PGRS family protein PE_PGRS20%2C transcript variant X1	-
100165242	52.72299612	53.9173196	52.78714846	36.82260372	36.680921	35.64316515	-0.539728897	3.24E-22	8.12E-21	LOC100165242	NC_042494.1	129137742	129154140	+	3408	protein_coding	uncharacterized LOC100165242	-
100166100	20.17559333	23.22702427	26.50337243	39.40784923	36.64516296	47.20391279	0.826908769	1.41E-10	1.45E-09	LOC100166100	NC_042494.1	13745423	13749149	-	641	protein_coding	mitochondrial import inner membrane translocase subunit TIM14-like	-
100575479	51.39344153	54.94855589	50.14971315	35.99050228	36.64083477	38.29599214	-0.489977353	1.66E-09	1.53E-08	LOC100575479	NC_042495.1	117640680	117642102	-	888	lncRNA	uncharacterized LOC100575479	-
100158859	44.15563876	43.87812932	42.3852713	37.22745946	36.55505789	36.51947029	-0.235094438	0.000132617	0.000626059	LOC100158859	NC_042495.1	79913149	79919598	+	2360	protein_coding	zinc transporter ZIP3	-
100163275	29.08972824	28.05209605	27.33344246	30.87322151	36.42361806	32.8607801	0.252204754	0.000289221	0.001270515	LOC100163275	NC_042496.1	29434960	29455282	+	8428	protein_coding	E3 ubiquitin-protein ligase HECTD1	HECT
100159967	48.05054836	53.34522358	52.80792279	38.18320202	36.40390818	37.73488779	-0.449765937	1.59E-09	1.47E-08	LOC100159967	NC_042494.1	23443100	23445043	-	1322	protein_coding	proteasome subunit beta type 7%2C10-like	Proteasome
100163170	29.02214879	31.54083246	27.9456585	36.63486721	36.38425502	36.56530199	0.314810171	5.10E-06	3.03E-05	LOC100163170	NC_042494.1	164702939	164708444	-	2503	protein_coding	uncharacterized LOC100163170	-
100163531	32.95476338	33.46143559	32.70625664	37.3448758	36.32210176	38.15995974	0.180624205	0.01776499	0.048828964	LOC100163531	NC_042494.1	152637714	152639334	-	1194	protein_coding	osteopetrosis-associated transmembrane protein 1-like	-
100160314	41.1667571	43.91681339	42.9475272	37.98584697	36.31926174	35.2118268	-0.218093171	0.001376063	0.005203566	LOC100160314	NC_042494.1	131992943	131997873	-	1904	protein_coding	U3 small nucleolar RNA-associated protein 15 homolog	-
100163588	27.25435284	30.67767106	29.90236491	33.57298134	36.2764145	35.69258131	0.272420503	0.000548306	0.002288523	LOC100163588	NC_042495.1	83695999	83717130	+	1562	protein_coding	EF-hand domain-containing protein D2 homolog	-
100166272	47.02920415	51.0844036	46.91285269	37.88784794	36.27344135	39.5950874	-0.343559558	2.99E-07	2.09E-06	LOC100166272	NC_042493.1	42466209	42471633	-	2561	protein_coding	eukaryotic translation initiation factor 5B	GTP_EFTU
100163848	20.853384	23.65095065	21.35026527	30.36985592	36.25733604	31.65107286	0.584569009	7.37E-13	9.46E-12	LOC100163848	NC_042495.1	72318174	72323607	+	3934	protein_coding	uncharacterized LOC100163848	-
100167844	48.20691205	52.01397075	48.35993011	28.18107321	36.25566407	32.09310451	-0.615425839	5.92E-13	7.73E-12	LOC100167844	NC_042495.1	58413793	58469464	+	3216	protein_coding	ras-interacting protein RIP3	CBM_14
100161890	27.88546144	31.21611243	29.52945005	33.42185323	36.24699034	38.26159239	0.291240377	0.000248782	0.001108452	LOC100161890	NC_042495.1	114501150	114510273	+	1841	protein_coding	cell-death-related nuclease 7%2C transcript variant X1	-
100169234	54.53246372	54.95810801	57.97260839	36.59464689	36.1050941	37.56608766	-0.595740641	1.72E-16	3.00E-15	LOC100169234	NC_042496.1	11339261	11345874	-	1180	protein_coding	histone chaperone asf1%2C transcript variant X1	-
100161927	47.64657638	48.80936566	49.5765345	35.41140855	36.09414653	36.22949254	-0.431841967	4.27E-15	6.65E-14	LOC100161927	NC_042495.1	97904142	97912232	-	3880	protein_coding	flocculation protein FLO11	-
100571139	42.03608062	52.26632047	45.81388743	42.26256506	36.06641205	38.98134231	-0.248787572	0.009590272	0.028727115	LOC100571139	NC_042496.1	2149978	2154617	-	1153	protein_coding	uncharacterized LOC100571139	-
100159459	46.7386101	52.73532675	46.44297338	39.44880274	36.02493731	37.75998003	-0.358819165	4.11E-07	2.83E-06	LOC100159459	NC_042494.1	78019134	78027646	-	3259	protein_coding	RNA cytidine acetyltransferase%2C transcript variant X1	-
100160608	49.5720414	47.34500303	45.49235371	34.89329926	35.97755345	36.73701133	-0.398047798	5.20E-09	4.54E-08	LOC100160608	NC_042494.1	45736025	45737939	-	1915	protein_coding	F-box/LRR-repeat protein 14	-
100168592	40.88333031	41.31744857	40.41204536	37.5209407	35.89862513	33.3553135	-0.192563152	0.005945457	0.01903439	LOC100168592	NC_042494.1	72680329	72682448	+	2047	protein_coding	AP-1 complex subunit mu-1	Adap_comp_sub
100164702	38.85785784	40.93309576	40.29176747	35.43964439	35.86073197	35.26311182	-0.165244931	0.006137808	0.019547073	LOC100164702	NC_042496.1	17903416	17909814	-	2703	protein_coding	transcription factor 25	DUF654
100161211	163.6479006	86.39644881	125.4200822	23.34362213	35.84823491	30.22541514	-2.064749535	3.98E-11	4.34E-10	LOC100161211	NC_042496.1	32087087	32093730	-	4928	protein_coding	extensin-2	-
100144781	88.40375065	63.65278754	70.86833164	40.54501781	35.80840429	39.13544501	-0.9428864	2.30E-18	4.53E-17	Catb-2744	NC_042494.1	117337479	117340585	+	1446	protein_coding	cathepsin B-2744	Peptidase_C1
100163965	29.80138813	30.68987118	30.40739454	35.40859917	35.77343724	31.84023311	0.187765793	0.008344582	0.025553661	LOC100163965	NC_042496.1	4412322	4420915	-	2427	protein_coding	protein scarlet	ABC_tran
100165836	31.48211859	32.48662766	29.22911286	35.20484569	35.71073658	35.66091959	0.199863276	0.003798381	0.012802191	LOC100165836	NC_042494.1	111699119	111715173	+	2235	protein_coding	TRPL translocation defect protein 14	-
100166874	19.70545601	19.52358413	19.2788541	41.79572435	35.65491967	39.28946769	1.003344568	1.89E-40	1.14E-38	LOC100166874	NC_042494.1	138089165	138142815	+	3076	protein_coding	ATP-binding cassette sub-family G member 4%2C transcript variant X4	ABC_tran
100168515	31.50860371	30.28894797	29.84674688	35.30704171	35.4804385	35.66649179	0.222368429	0.003645447	0.01235271	LOC100168515	NC_042494.1	161945424	161947374	+	1275	protein_coding	hydroxyacid oxidase 1-like	FMN_dh
100166021	29.05207609	27.44206602	29.52304483	34.31947588	35.40163457	34.94516479	0.289990713	9.00E-05	0.000439317	LOC100166021	NC_042494.1	81457324	81460915	-	1579	protein_coding	4-hydroxybenzoate polyprenyltransferase%2C mitochondrial	UbiA
100160143	26.27192868	29.09423583	26.11617257	36.16473411	35.37928276	37.00483372	0.420556009	1.01E-08	8.60E-08	LOC100160143	NC_042494.1	122881925	122892990	+	1981	protein_coding	sphingomyelin synthase-related 1	-
100163393	24.70934402	23.58490343	24.17737285	31.62988878	35.36246924	32.8307415	0.468560076	7.87E-12	9.23E-11	LOC100163393	NC_042493.1	84416283	84429436	+	3266	protein_coding	phenoloxidase 2%2C transcript variant X3	-
100164006	13.98719558	6.991110226	9.490199037	30.29400474	35.30467667	33.01123332	1.699614012	1.42E-08	1.18E-07	LOC100164006	NC_042494.1	111250112	111268471	-	4134	protein_coding	matrix metalloproteinase-16%2C transcript variant X1	Hemopexin
100158972	32.95834859	32.58547538	32.36712503	36.83742168	35.29395239	36.12710737	0.151689522	0.005078721	0.016579141	LOC100158972	NC_042494.1	69854654	69884945	-	5831	protein_coding	ankyrin-3%2C transcript variant X4	Death
100167210	17.76645745	16.1233195	15.94365703	26.9555167	35.2814649	31.76650271	0.921542794	1.04E-20	2.38E-19	LOC100167210	NC_042494.1	97893234	97904360	-	2509	protein_coding	inactive pancreatic lipase-related protein 1	Lipase
100166117	5.00699901	5.193246571	4.823143508	35.30791655	35.26929065	37.21041683	2.848829731	1.14E-222	2.58E-219	LOC100166117	NC_042495.1	38232610	38236128	+	2104	protein_coding	myrosinase 1%2C transcript variant X4	Glyco_hydro_1
100163091	31.7400925	29.81521538	28.56398718	32.50125359	35.2627619	34.98692343	0.195366379	0.00540843	0.017528511	LOC100163091	NC_042495.1	11154922	11166116	-	2950	protein_coding	nicotinate phosphoribosyltransferase%2C transcript variant X1	-
100163265	18.50513514	19.22660807	18.50838709	36.04849536	35.21671583	37.26318731	0.955085504	1.07E-31	4.21E-30	Spz1-1	NC_042495.1	97838696	97849719	-	1334	protein_coding	spaetzle 1-1	-
100165228	27.63633566	30.59667577	26.74160071	32.02143318	35.18905745	33.6825309	0.254330005	0.001669585	0.006190609	LOC100165228	NC_042494.1	26510708	26528574	-	1667	protein_coding	galactokinase	GHMP_kinases
100168729	25.48053349	25.10138255	23.9238992	33.29247204	35.14462528	32.13568344	0.439258707	4.73E-10	4.66E-09	LOC100168729	NC_042495.1	48011786	48030226	+	2439	protein_coding	zinc transporter ZIP13 homolog%2C transcript variant X3	-
100165753	40.08046901	40.53212806	41.17912116	33.72063625	35.14126806	35.62448801	-0.214223258	0.000731398	0.00295122	LOC100165753	NC_042494.1	77152696	77157932	-	2241	protein_coding	septin-1%2C transcript variant X2	GTP_CDC
100164009	57.9857306	72.55878645	63.84756044	19.15955044	35.09491524	28.91020457	-1.218150023	1.96E-06	1.24E-05	LOC100164009	NC_042494.1	37050035	37057205	+	1991	protein_coding	uncharacterized LOC100164009	-
100168700	45.69152186	46.58540779	44.33152415	39.15306203	35.07180962	36.90485159	-0.290996958	6.98E-06	4.07E-05	LOC100168700	NC_042495.1	56000611	56007830	+	3264	protein_coding	serine/threonine-protein kinase polo%2C transcript variant X1	Pkinase
100164483	29.65052676	28.42467022	27.7272769	34.82765828	34.95186014	33.71456146	0.276934531	4.90E-06	2.91E-05	LOC100164483	NC_042494.1	123235146	123322965	+	4070	protein_coding	division abnormally delayed protein	-
100168678	41.51255467	41.33465989	39.69222962	32.3975753	34.87465908	34.07604095	-0.267383326	1.55E-05	8.63E-05	LOC100168678	NC_042494.1	155033231	155061493	-	3157	protein_coding	neprilysin-1%2C transcript variant X2	-
100164321	41.86872906	43.09417011	41.8723446	34.62364814	34.86907545	35.32269925	-0.268311477	6.64E-06	3.89E-05	LOC100164321	NC_042494.1	35975812	35984144	+	2641	protein_coding	N-acetylgalactosaminyltransferase 7	Glycos_transf_2
100162562	55.05610778	42.73102816	47.58630612	27.8262915	34.83955883	29.70480378	-0.648165988	6.89E-11	7.33E-10	LOC100162562	NC_042494.1	126200909	126260533	-	4266	protein_coding	nuclear hormone receptor FTZ-F1	zf-C4
100160817	26.41303296	26.5173856	26.57152302	35.12663209	34.83332597	34.3732759	0.399009449	1.70E-13	2.31E-12	LOC100160817	NC_042495.1	14923779	14931958	+	5374	protein_coding	uncharacterized LOC100160817%2C transcript variant X2	Pkinase
100164952	39.64485564	39.51359149	38.77192439	34.17221011	34.58844403	34.13813949	-0.190060334	0.004974275	0.016278602	Ubfd1	NC_042494.1	70305746	70310234	+	1637	protein_coding	ubiquitin family domain containing 1	ubiquitin
100169568	45.11287805	51.21804862	45.62354426	38.82145654	34.55212625	38.2966509	-0.33924929	6.92E-05	0.000344899	LOC100169568	NC_042495.1	67746491	67747621	-	1131	protein_coding	uncharacterized protein C19orf52 homolog	-
100167207	73.77936635	67.30013661	70.94166437	23.46830616	34.54139578	28.37902171	-1.288902959	1.89E-32	7.69E-31	LOC100167207	NC_042496.1	41695849	41705621	-	1820	protein_coding	retinol dehydrogenase 14%2C transcript variant X2	adh_short
100165346	26.05979263	26.53291943	25.21325618	36.67925693	34.47820554	35.9002668	0.46697017	9.64E-11	1.01E-09	LOC100165346	NC_042494.1	141634155	141666843	+	1795	protein_coding	carbonic anhydrase 2	-
100164515	29.61231538	28.20460307	28.66245279	35.08070996	34.4768853	31.8532959	0.236525232	0.000340431	0.001477573	LOC100164515	NC_042493.1	72379244	72391784	+	3531	protein_coding	contactin	I-set
100158876	12.13987407	14.4897751	12.94854693	34.78193989	34.46689188	35.10258525	1.406175257	1.42E-52	1.30E-50	LOC100158876	NC_042496.1	2310418	2313701	-	1347	protein_coding	serine protease-like	Trypsin
100163240	21.3182579	17.4045388	19.74288416	32.28104303	34.46395346	34.80979703	0.802727637	1.44E-22	3.69E-21	LOC100163240	NC_042495.1	28563170	28588995	-	3520	protein_coding	uncharacterized LOC100163240	fn3
100574281	21.5864609	25.21122211	23.08666347	30.03750331	34.41323027	31.54803779	0.465501866	4.99E-06	2.97E-05	ACYPI47960	NC_042494.1	137067486	137078839	+	885	protein_coding	uncharacterized LOC100574281	-
100158796	63.90480961	58.09588356	57.94219416	31.40211721	34.39741524	33.15232466	-0.856419908	7.84E-35	3.52E-33	LOC100158796	NW_021771609.1	4352	8012	-	2613	protein_coding	uncharacterized LOC100158796	-
100161845	29.74112683	28.59172573	29.68539939	31.47094405	34.29031942	32.79882422	0.16992371	0.013553413	0.038687116	LOC100161845	NC_042495.1	57529554	57532685	+	2309	protein_coding	senecionine N-oxygenase	FMO-like
100167553	38.55595941	40.81721424	38.09797758	33.84066198	34.27498608	33.8548111	-0.197375226	0.003359777	0.011495814	LOC100167553	NC_042494.1	153711030	153714790	+	1880	protein_coding	uncharacterized protein C6orf106 homolog%2C transcript variant X1	-
100163022	28.53978483	28.14782518	27.93776164	35.71037397	34.27178506	35.83626407	0.329044356	2.21E-07	1.57E-06	LOC100163022	NC_042494.1	87928910	87933417	+	2661	protein_coding	cornichon-like%2C transcript variant X1	DFP
100160611	25.97909221	26.01122572	26.74685497	27.16683444	34.22745284	30.92481414	0.23638097	0.006533653	0.020661745	LOC100160611	NC_042495.1	666405	690336	-	2312	protein_coding	BCL2/adenovirus E1B 19 kDa protein-interacting protein 3	-
100161387	17.92782689	19.90864703	19.97838481	32.06849289	34.22248076	31.77927801	0.770423684	3.73E-17	6.83E-16	LOC100161387	NC_042494.1	69441077	69450624	-	1127	protein_coding	acyl-protein thioesterase 1%2C2-like	Abhydrolase_2
100168522	46.3616714	47.35827118	49.13254642	36.98716659	34.1777277	39.11282311	-0.366421346	3.10E-06	1.91E-05	LOC100168522	NC_042494.1	8342653	8345197	+	1254	protein_coding	protein dpy-30 homolog	Dpy-30
100167426	32.29064151	30.82745715	31.11549361	37.82681602	34.16084083	36.3904361	0.208376108	0.001823204	0.006697251	LOC100167426	NC_042495.1	8578241	8584650	-	3075	protein_coding	serine/arginine repetitive matrix protein 1%2C transcript variant X1	-
100161598	28.24694004	29.81141469	28.34289294	36.12982721	34.15202516	36.23903243	0.308766201	0.000746299	0.003002897	LOC100161598	NC_042494.1	125162934	125165314	+	796	protein_coding	keratinocyte-associated protein 2-like	-
100167764	20.39006333	21.44917617	20.07929066	35.64975902	34.08548565	34.4090804	0.756909464	1.98E-31	7.69E-30	LOC100167764	NC_042494.1	127671161	127729566	+	3179	protein_coding	ATP-binding cassette sub-family D member 1	ABC_tran
100161968	37.77875233	40.54249884	39.15181485	33.10153111	34.0601689	34.62658868	-0.19976921	0.002127169	0.007667431	LOC100161968	NC_042495.1	42833774	42847290	+	2261	protein_coding	organic cation transporter protein	Sugar_tr
100162435	71.0067955	56.36109434	66.40594676	29.52794141	34.03554821	29.73377364	-1.048126662	5.94E-28	1.97E-26	LOC100162435	NC_042494.1	125508661	125520468	-	1565	protein_coding	tetra-peptide repeat homeobox protein 1	-
100159414	32.62093317	31.83273406	32.90391441	37.97460544	33.95377211	37.4393302	0.174640324	0.015008333	0.042200403	Rab14	NC_042493.1	54361063	54371776	-	2163	protein_coding	Rab-protein 14%2C transcript variant 4	Ras
100164234	24.89478407	27.14537267	26.66288908	41.7879474	33.95354786	36.40843031	0.5182203	9.30E-11	9.76E-10	LOC100164234	NC_042494.1	35840107	35946786	-	5517	protein_coding	Ig-like and fibronectin type-III domain-containing protein 1	fn3
100159178	26.71583136	32.07611312	29.61423987	40.16865256	33.94325468	35.8187986	0.321959334	0.000268668	0.001188997	LOC100159178	NC_042495.1	28801163	28829506	+	2235	protein_coding	lactase-phlorizin hydrolase%2C transcript variant X1	Glyco_hydro_1
novel.126	38.93311817	36.80359686	37.52654706	29.10776595	33.92715474	29.84978445	-0.279569538	0.000148291	0.000691712	-	NC_042493.1	16176894	16192662	-	3140	-	PF00106:short chain dehydrogenase	adh_short
100169413	28.06517643	27.46396865	27.95867464	33.46082488	33.90591855	32.46933956	0.264844384	0.000543517	0.002271541	LOC100169413	NC_042495.1	42008217	42010507	-	1353	protein_coding	ryanodine receptor-like	-
100165906	26.81053477	29.36695043	28.57580024	30.07389583	33.88596502	33.77329775	0.212622305	0.003350926	0.011471183	Cact	NC_042494.1	103261745	103292868	+	3120	protein_coding	cactus%2C transcript variant X4	-
100165761	64.69134648	51.90982079	58.97013918	21.78676673	33.81992229	29.02907891	-1.046742831	3.37E-16	5.78E-15	LOC100165761	NC_042494.1	66804312	66814489	-	1369	protein_coding	uncharacterized LOC100165761	-
100160018	38.91983395	43.57974935	41.39203913	35.72431824	33.7673542	35.81746756	-0.227200952	0.004984863	0.016306485	LOC100160018	NC_042494.1	26083996	26086623	-	1112	protein_coding	charged multivesicular body protein 5	ESCRT-III
100159110	12.62623971	11.55590333	11.43096744	33.45538157	33.7314028	31.8515846	1.481105528	7.08E-57	7.02E-55	LOC100159110	NC_042494.1	162316067	162321521	-	1292	protein_coding	uncharacterized protein LOC100159110	-
100160498	21.16927834	24.84931053	23.06506609	33.94963338	33.70986295	35.74224089	0.589248043	1.33E-13	1.84E-12	LOC100160498	NC_042495.1	49464977	49469139	+	1972	protein_coding	leukocyte elastase inhibitor	Serpin
100161600	38.3177037	40.79919422	39.92573443	32.00223567	33.62729353	34.14620573	-0.247751185	8.28E-05	0.000406636	LOC100161600	NC_042496.1	5562168	5567772	-	2856	protein_coding	MICOS complex subunit Mic60	-
100159021	22.11279294	29.29751335	27.42996904	35.18298526	33.6165236	34.75809909	0.40128173	1.39E-05	7.83E-05	LOC100159021	NC_042496.1	26761801	26771870	+	2958	protein_coding	peroxidase%2C transcript variant X4	An_peroxidase
100163155	38.81500622	36.51057235	39.32906305	25.45442084	33.58561713	29.86658053	-0.36033465	0.000148105	0.00069132	LOC100163155	NC_042495.1	2606020	2633046	-	1911	protein_coding	phospholipase A2-like%2C transcript variant X1	-
100166835	37.75516215	38.00857333	39.19938714	25.32073098	33.57430378	32.48632265	-0.324562316	0.000997375	0.003899774	LOC100166835	NC_042494.1	59611917	59630497	+	1670	protein_coding	perlucin%2C transcript variant X1	Lectin_C
100162199	26.14136941	24.58471278	25.98727429	33.38244383	33.57311018	31.48138172	0.366519443	4.91E-09	4.30E-08	LOC100162199	NC_042494.1	43392692	43427883	+	4475	protein_coding	transcriptional coactivator YAP1	WW
100164875	25.64172546	25.30851258	25.77092547	27.56236185	33.53905332	31.97862506	0.285479442	0.000196893	0.000895727	LOC100164875	NC_042494.1	36355962	36375556	+	4553	protein_coding	autophagy-related protein 101%2C transcript variant X1	-
100574642	37.84592229	35.18897963	35.81700921	29.9922508	33.51961761	31.88866755	-0.183864132	0.006764543	0.021285242	LOC100574642	NC_042496.1	25466724	25498331	+	3386	protein_coding	uncharacterized LOC100574642	-
100169144	21.9056356	20.41900737	22.03608334	28.2569909	33.51508626	30.21959287	0.522065497	1.27E-09	1.19E-08	LOC100169144	NC_042494.1	90053650	90073385	-	1877	protein_coding	thiamine transporter 1	-
100164968	30.28634956	32.31886969	30.43071135	35.19585176	33.48721533	35.50148543	0.17013876	0.008448519	0.025768442	LOC100164968	NC_042494.1	114456212	114510589	+	2906	protein_coding	uncharacterized LOC100164968	Fork_head
103308675	36.11132215	39.44970595	37.82483537	31.95119543	33.47317196	32.41580735	-0.205590934	0.002536571	0.008954908	LOC103308675	NC_042495.1	8045121	8047302	-	2090	protein_coding	splicing factor 3A subunit 3	-
100168919	46.26023233	48.72040887	46.61008129	36.88230683	33.37331996	34.91908349	-0.421971948	1.16E-10	1.20E-09	LOC100168919	NC_042496.1	26738066	26752838	+	2669	protein_coding	peroxidase%2C transcript variant X3	An_peroxidase
100165158	25.02111897	27.45717919	28.39690545	35.98956924	33.30081495	34.68643828	0.370321813	3.26E-06	2.00E-05	LOC100165158	NC_042494.1	90594976	90601637	+	1648	protein_coding	RNA-binding protein-like%2C transcript variant X4	RRM_1
100161462	22.75203419	23.45880655	22.94700396	32.41965614	33.19637169	32.4812987	0.511219606	7.14E-13	9.20E-12	LOC100161462	NC_042494.1	12797142	12800116	+	1840	protein_coding	major facilitator superfamily domain-containing protein 9%2C transcript variant X1	MFS_1
100165265	37.52953199	41.50468295	40.93682493	33.51316835	33.15797028	37.06152828	-0.202686754	0.007718513	0.023914962	LOC100165265	NC_042494.1	61186536	61190132	+	1878	protein_coding	uncharacterized LOC100165265%2C transcript variant X1	-
100168122	29.38915491	30.96268516	30.22834624	35.1842656	33.05869676	35.1416444	0.197747259	0.002117506	0.007637835	LOC100168122	NC_042494.1	25474817	25484559	+	2873	protein_coding	proton-coupled amino acid transporter-like protein CG1139	Aa_trans
100166864	26.27511334	23.49282481	24.11371245	29.48495223	33.05232393	30.69629325	0.34182693	6.86E-06	4.01E-05	LOC100166864	NC_042495.1	115616304	115622861	-	2835	protein_coding	poly(A) polymerase type 3	NTP_transf_2
100160968	40.39077164	41.7279745	43.31790601	36.50891755	33.02673512	36.32669446	-0.237594881	0.001139752	0.004405163	LOC100160968	NC_042495.1	3781889	3788197	-	1780	protein_coding	flap endonuclease-1%2C transcript variant X2	XPG_I
100162600	44.63420907	41.62477856	41.2161433	36.30388567	33.025305	35.50248698	-0.275689498	4.69E-05	0.000241455	LOC100162600	NC_042496.1	33872733	33905229	+	3137	protein_coding	uncharacterized LOC100162600%2C transcript variant X1	-
100169318	18.9410987	19.27626172	19.19664696	27.7323603	32.90341454	31.10989043	0.682989743	1.35E-19	2.88E-18	LOC100169318	NC_042495.1	45828732	45846048	-	3665	protein_coding	nose resistant to fluoxetine protein 6	-
100575257	43.20146507	49.20148687	47.69260473	33.11605586	32.87477067	33.47228157	-0.48664218	9.58E-09	8.16E-08	ACYPI56194	NC_042495.1	76976154	76977082	+	929	protein_coding	putative exosome complex exonuclease rrp40-like	-
100164346	35.67605368	36.77078184	39.32458772	31.49974342	32.86932864	32.48185898	-0.199437573	0.002472347	0.00875757	LOC100164346	NC_042493.1	84969072	84982398	-	2781	protein_coding	E3 ubiquitin-protein ligase synoviolin B%2C transcript variant X1	-
100160227	39.0821158	40.74305692	37.27387453	34.95345049	32.86732587	33.68436093	-0.19962914	0.008335752	0.025536535	LOC100160227	NC_042495.1	105209589	105211377	-	1388	protein_coding	charged multivesicular body protein 3-like	ESCRT-III
100164637	37.41161615	40.37637476	36.94610805	33.41863382	32.85119235	32.67538396	-0.206701907	0.000674467	0.002748207	LOC100164637	NC_042494.1	90845754	90850945	-	4082	protein_coding	apoptotic chromatin condensation inducer in the nucleus	-
100162279	27.42651108	28.25350946	26.83778461	40.53076397	32.81988003	37.7649071	0.436090796	4.48E-07	3.07E-06	LOC100162279	NC_042493.1	69316718	69344499	-	1975	protein_coding	probable G-protein coupled receptor Mth-like 5	-
100166936	28.70066809	26.39873451	27.10174428	31.79550289	32.80410397	30.08880051	0.210617079	0.000684495	0.002783318	LOC100166936	NC_042493.1	3126590	3177923	+	8256	protein_coding	serine/threonine-protein kinase MARK2%2C transcript variant X4	Pkinase
100570068	37.06475829	42.17218005	40.13087881	33.18750366	32.77754541	34.26082977	-0.244797673	0.004078475	0.013620272	LOC100570068	NC_042494.1	81711123	81713394	-	981	protein_coding	uncharacterized LOC100570068	-
107883965	40.46481641	39.46465894	37.38567674	32.52060096	32.77178694	32.22513333	-0.260285718	7.40E-05	0.000367161	LOC107883965	NC_042495.1	40293255	40297884	-	2346	protein_coding	phospholipid scramblase 1-like	Scramblase
100163759	30.28362142	27.73714603	29.43866396	35.03000556	32.76892659	36.02456507	0.253899622	0.000789051	0.003156403	LOC100163759	NC_042496.1	521878	532101	-	1899	protein_coding	lysosomal Pro-X carboxypeptidase	Peptidase_S28
100165248	36.02502403	36.60507883	40.25723231	33.00956997	32.75736354	29.58296029	-0.235563351	0.012512288	0.03617489	Psenen	NC_042495.1	57614035	57615045	-	826	protein_coding	presenilin enhancer 2	-
100144780	17.83507738	16.17752548	16.40995041	34.83888827	32.61310549	33.53487483	1.008001183	1.96E-36	9.88E-35	Catb-912	NC_042493.1	125294032	125302535	-	1869	protein_coding	cathepsin B-912	Peptidase_C1
novel.32	0	0.057882783	0.031438652	23.4224089	32.45434838	29.29273145	9.935218753	4.17E-32	1.67E-30	-	NC_042493.1	39590850	39592290	+	1441	-	-	-
100160910	42.08044461	44.68980622	45.98070838	39.20501806	32.44738849	37.51017861	-0.274879042	0.003075129	0.010623233	LOC100160910	NC_042495.1	8420661	8424141	+	936	protein_coding	eukaryotic translation initiation factor 6-like	-
100575747	36.65500888	36.97505919	36.4801051	31.78981999	32.4402254	31.34006498	-0.197486715	0.000416639	0.001782833	LOC100575747	NC_042494.1	159129711	159137373	+	4118	protein_coding	uncharacterized LOC100575747	ECH
100163208	29.7659098	28.51503763	28.343912	33.06608958	32.40353818	31.85690837	0.174641344	0.002733226	0.009559323	LOC100163208	NC_042494.1	141031458	141062588	+	4803	protein_coding	guanine nucleotide-binding protein G(q) subunit alpha%2C transcript variant X2	G-alpha
100168053	27.18207985	25.4697561	24.81306933	34.45922649	32.39325167	33.51012776	0.379923651	7.82E-09	6.72E-08	LOC100168053	NC_042494.1	123385877	123444796	+	3825	protein_coding	glypican-6	-
100168049	37.97125333	38.8975083	40.57844054	33.10684933	32.29728223	31.44939212	-0.270703601	0.000294599	0.001291799	LOC100168049	NC_042494.1	68996057	69002515	+	1352	protein_coding	methionine aminopeptidase 1-like	Peptidase_M24
100161003	41.14852755	38.67786752	38.90610515	34.59124992	32.23439748	34.31867823	-0.224773776	0.000356037	0.001540225	LOC100161003	NC_042495.1	110648344	110687723	-	3803	protein_coding	MICAL-like protein 2%2C transcript variant X2	CH
100166306	27.49162608	27.49560188	28.17746244	30.96277121	32.23171131	31.7012744	0.197372215	0.008821108	0.026758434	LOC100166306	NC_042493.1	8037754	8044863	-	1447	protein_coding	PPPDE peptidase domain-containing protein 1-like%2C transcript variant X3	-
100160617	21.31572239	20.60588134	20.70386988	28.49814309	32.22228209	29.69094225	0.536344375	3.59E-16	6.16E-15	LOC100160617	NC_042495.1	94335262	94399394	-	5501	protein_coding	receptor-type guanylate cyclase Gyc76C%2C transcript variant X3	Guanylate_cyc
100164940	30.36810085	29.92192188	27.27650911	33.93716034	32.1902297	33.46804323	0.191811296	0.00894279	0.027075494	LOC100164940	NC_042494.1	3393256	3404921	-	2106	protein_coding	uncharacterized LOC100164940%2C transcript variant X1	MFS_1
100160762	10.90561372	6.35081542	8.434978779	35.46158133	32.15859546	30.29327686	1.934815629	3.55E-41	2.21E-39	LOC100160762	NC_042496.1	20493714	20509294	+	1622	protein_coding	alpha-tocopherol transfer protein	-
100159641	45.5980674	51.38725239	52.15765363	33.9130938	32.13445716	34.90241395	-0.555517216	2.12E-11	2.38E-10	LOC100159641	NC_042495.1	5695441	5696763	+	1150	protein_coding	endoplasmic reticulum resident protein 29	-
100162410	27.13185499	28.12705026	28.47623299	30.30186626	32.09696557	32.69920448	0.190600335	0.004209664	0.013993276	LOC100162410	NC_042494.1	141215557	141226114	-	2660	protein_coding	H(+)/Cl(-) exchange transporter 7%2C transcript variant X2	Voltage_CLC
100159455	27.28128898	25.61261172	26.69380048	28.87901761	32.09480053	30.95117606	0.214445811	0.002425928	0.008604737	LOC100159455	NC_042495.1	51220531	51226602	+	2729	protein_coding	leucine-rich repeat-containing protein 55%2C transcript variant X2	-
100163266	34.58997436	40.44745399	37.92427501	33.07969505	32.07644532	31.86185696	-0.21202393	0.005648034	0.018215257	LOC100163266	NC_042494.1	51682724	51686861	-	1891	protein_coding	nucleolar protein 11	-
100161650	26.22101293	26.72871186	26.66591413	31.16545438	32.06105701	31.60051201	0.259190325	0.000283369	0.001247059	LOC100161650	NC_042496.1	37146355	37151273	-	1721	protein_coding	geranylgeranyl pyrophosphate synthase	-
100570813	23.87638268	25.59644031	26.84628026	33.59388126	32.00351945	31.50531872	0.355590027	0.000117795	0.000561807	LOC100570813	NC_042493.1	119015507	119020142	+	945	protein_coding	uncharacterized LOC100570813	-
100159280	27.11064932	27.97757816	26.6739765	31.5908467	31.98124664	33.38716107	0.25252547	0.000203719	0.000924116	LOC100159280	NC_042494.1	43079880	43093551	+	2230	protein_coding	resistance to inhibitors of cholinesterase protein 3%2C transcript variant X1	-
100167168	28.00884966	29.44557211	29.5384032	34.64603228	31.85743597	33.23947315	0.204624405	0.009090179	0.027453247	LOC100167168	NC_042494.1	23537163	23543898	-	1388	protein_coding	persulfide dioxygenase ETHE1%2C mitochondrial%2C transcript variant X1	Lactamase_B
100164376	50.56116318	53.11227676	53.77581474	32.7351113	31.85743597	28.81574253	-0.745812337	3.73E-23	9.91E-22	LOC100164376	NC_042494.1	1872899	1889655	-	1572	protein_coding	uncharacterized LOC100164376	-
100165365	23.95756831	24.93328025	23.4005278	33.06039718	31.84794612	30.74513676	0.41072073	1.83E-06	1.16E-05	Znhit1	NC_042494.1	45247525	45249854	-	1119	protein_coding	zinc finger%2C HIT-type containing 1	-
100159955	28.21563639	28.39796771	28.94791174	31.27902131	31.80344032	31.99658809	0.159121375	0.014055156	0.039904299	LOC100159955	NC_042494.1	84504256	84509050	+	2360	protein_coding	regulator of microtubule dynamics protein 1%2C transcript variant X1	-
100167631	20.98070586	22.96308535	20.67127552	28.95907829	31.79228784	30.98345147	0.512192194	4.81E-09	4.22E-08	LOC100167631	NC_042494.1	98547747	98553290	+	1304	protein_coding	AN1-type zinc finger protein 2B-like%2C transcript variant X1	zf-AN1
100144905	41.0876117	44.30220034	41.07039974	34.17724569	31.66623968	32.9679014	-0.349021893	5.16E-07	3.51E-06	Ipps	NC_042495.1	76119161	76123184	+	2055	protein_coding	mitochondrial isoprenyl diphosphate synthase	-
100162828	37.13838036	36.87222831	36.01590678	33.85893054	31.59189161	32.6847206	-0.15828763	0.007815075	0.024166687	LOC100162828	NC_042495.1	8674823	8678861	-	4039	protein_coding	manganese-transporting ATPase 13A1	E1-E2_ATPase
100165077	74.48806937	50.97854339	68.29457467	31.2600283	31.46628055	29.96658692	-1.057629044	1.88E-17	3.50E-16	cp39	NC_042494.1	62356933	62357811	-	733	protein_coding	cuticular protein 39	Chitin_bind_4
100158702	40.26901505	42.48164831	38.68115444	35.76122844	31.46608859	32.49157217	-0.277364477	0.000175971	0.000807765	LOC100158702	NC_042494.1	134951587	134957705	+	2415	protein_coding	uncharacterized LOC100158702%2C transcript variant X1	-
100168386	35.22672564	45.5009803	42.61484938	26.01035833	31.44928271	28.49287489	-0.513403853	6.49E-07	4.36E-06	LOC100168386	NC_042493.1	59823279	59843496	-	1483	protein_coding	astacin	Astacin
100165858	23.30592144	27.02536255	24.97312463	34.4110061	31.4281606	35.01219903	0.428691937	5.73E-08	4.43E-07	Ptcd1	NC_042495.1	78714337	78720629	-	2449	protein_coding	pentatricopeptide repeat domain 1	-
103309634	35.59133319	34.22611218	34.83713356	31.97431051	31.41265502	30.56923137	-0.148839697	0.015761097	0.044018912	LOC103309634	NC_042495.1	54194974	54204076	-	3056	protein_coding	double-stranded RNA-binding protein Staufen homolog 2	-
100164343	37.61550027	42.16384614	40.05875988	37.19757333	31.40522567	35.18016818	-0.200303615	0.008410782	0.025691561	LOC100164343	NC_042494.1	63653100	63677402	-	4086	protein_coding	protein masquerade%2C transcript variant X2	Trypsin
100165546	37.9571614	38.26320308	36.79755695	31.41318292	31.36841094	30.28423322	-0.273467371	1.12E-06	7.28E-06	LOC100165546	NC_042496.1	2669790	2683485	-	4799	protein_coding	sister chromatid cohesion protein PDS5 homolog B-B%2C transcript variant X2	-
100169166	30.50632428	27.89025282	28.9245872	34.49945326	31.29224563	32.28374957	0.174151915	0.009467263	0.02840719	LOC100169166	NC_042496.1	5202476	5225982	+	4622	protein_coding	integrin alpha-PS2	FG-GAP
100161350	25.8889307	22.72096832	22.13600874	27.89004702	31.26832265	30.99442166	0.355115798	0.000132444	0.000625567	LOC100161350	NC_042495.1	107008661	107027097	-	1406	protein_coding	E3 ubiquitin-protein ligase ZNRF2	-
100160523	36.10312325	37.69238282	35.83728718	30.8677458	31.25484637	31.02936464	-0.228224092	0.000235747	0.001054246	LOC100160523	NC_042495.1	41986631	42018362	+	2661	protein_coding	adenylosuccinate lyase%2C transcript variant X1	RRM_1
100161171	34.15731185	35.85618597	35.84561618	30.41587735	31.23851722	31.0512682	-0.184321753	0.002854278	0.009943021	LOC100161171	NC_042496.1	19397927	19407286	+	2831	protein_coding	RNA polymerase II-associated factor 1 homolog%2C transcript variant X2	-
100188938	34.97584966	37.19070645	36.30865818	32.9230614	31.2228257	30.2250229	-0.19366681	0.009983004	0.02969492	LOC100188938	NC_042494.1	140474161	140485955	+	1506	protein_coding	dolichyl-diphosphooligosaccharide--protein glycosyltransferase subunit 4%2C transcript variant 1	-
100164052	23.42780392	27.36068647	25.70468947	32.53999223	31.208214	29.94638554	0.300179126	8.01E-05	0.000394594	LOC100164052	NC_042494.1	79509045	79578910	-	2797	protein_coding	prestin%2C transcript variant X2	Sulfate_transp
100159064	87.27504173	53.55663592	67.592544	19.47797411	31.19727596	25.89255945	-1.439249457	2.58E-07	1.82E-06	LOC100159064	NC_042495.1	13643634	13648682	+	1126	protein_coding	CG14661-like	-
100165902	25.36972261	21.81200052	23.69408888	30.30616182	31.19096242	28.62831629	0.35297558	2.20E-05	0.000119256	LOC100165902	NC_042494.1	78966797	78977166	-	1912	protein_coding	facilitated trehalose transporter Tret1-2 homolog%2C transcript variant X2	Sugar_tr
100167330	36.60481669	37.02027306	38.59737165	33.69731854	31.15935546	34.37193239	-0.170513804	0.013802613	0.039303152	LOC100167330	NC_042495.1	110708902	110711256	+	2297	protein_coding	28S ribosomal protein S27%2C mitochondrial	-
100166251	27.50465651	30.19566547	27.20817865	34.64391139	31.15566239	33.48898693	0.232600753	0.001535784	0.005744442	LOC100166251	NC_042495.1	58056362	58068902	-	2754	protein_coding	probable cytosolic iron-sulfur protein assembly protein Ciao1%2C transcript variant X1	-
100165733	39.88201776	37.44655693	38.80820343	28.03658451	31.12833777	28.51057622	-0.398946496	7.07E-09	6.10E-08	LOC100165733	NC_042495.1	101914758	101918844	+	2811	protein_coding	phosphoacetylglucosamine mutase	-
100160473	21.83130907	21.81099766	22.01247706	32.2809037	31.11398484	32.03205341	0.546359905	2.37E-14	3.46E-13	LOC100160473	NC_042495.1	5581319	5587086	+	1914	protein_coding	cyclic AMP-responsive element-binding protein 1%2C transcript variant X1	bZIP_1
100163571	40.2885139	41.72492844	39.54610603	30.09398897	31.09966705	31.25894281	-0.388225527	4.04E-09	3.59E-08	LOC100163571	NC_042496.1	27444634	27448346	+	2046	protein_coding	nuclear pore glycoprotein p62	-
100569832	46.3478587	46.42462679	43.41167082	25.90657174	31.08824235	30.19629491	-0.636944617	4.60E-15	7.13E-14	LOC100569832	NC_042494.1	139595652	139627487	-	1988	protein_coding	D-beta-hydroxybutyrate dehydrogenase%2C mitochondrial	adh_short
100161120	35.65916972	34.69610485	34.61175481	28.77102792	31.08633621	30.95299518	-0.202539349	0.00400524	0.013395506	LOC100161120	NC_042494.1	58323838	58335485	-	1928	protein_coding	transcription initiation factor TFIID subunit 6%2C transcript variant X2	-
100163627	27.53630892	28.21935987	28.00439513	32.66614105	31.04745905	31.72351185	0.195264545	0.003962499	0.013283689	LOC100163627	NC_042495.1	86011425	86026641	-	2137	protein_coding	uncharacterized protein CG3556	-
100164408	17.36237969	18.22075568	18.77979859	32.03631686	31.04318841	31.03726846	0.79959139	1.85E-20	4.18E-19	LOC100164408	NC_042494.1	11649168	11654297	-	1252	protein_coding	mage-e1-like	-
100164906	55.18763919	46.17020168	50.56278447	20.21848394	31.03354947	23.78618768	-1.011470417	3.17E-07	2.21E-06	LOC100164906	NC_042494.1	113502794	113585378	-	14410	protein_coding	mucin-3A%2C transcript variant X2	EGF_CA
100169119	36.07575902	38.30663433	35.98827957	31.94483991	31.03304422	33.78406621	-0.183116109	0.006212861	0.019753906	LOC100169119	NC_042494.1	54317818	54324373	-	2602	protein_coding	serine/arginine-rich splicing factor 4%2C transcript variant X2	-
100159441	24.56851918	23.09681423	22.69817403	29.26272961	31.01783046	29.05248908	0.350845912	6.72E-09	5.83E-08	LOC100159441	NC_042494.1	7530786	7588823	-	8259	protein_coding	facilitated trehalose transporter Tret1%2C transcript variant X4	Sugar_tr
100163876	26.25594048	23.84542165	24.060497	33.11491309	31.01400146	31.12846084	0.367354907	1.34E-06	8.62E-06	LOC100163876	NC_042494.1	56423629	56438410	+	2090	protein_coding	xylulose kinase	FGGY_N
100575117	211.0964094	121.7069396	175.9001708	33.00010951	31.00398688	28.53327548	-2.452792509	6.17E-24	1.70E-22	ACYPI009260	NC_042494.1	62475377	62476202	+	759	protein_coding	uncharacterized LOC100575117	Chitin_bind_4
100164603	35.82584532	34.17082073	34.93696973	30.11651254	30.98506748	30.99852348	-0.181645038	0.005342197	0.01732894	LOC100164603	NC_042495.1	114930378	114943882	+	2325	protein_coding	RNA polymerase II elongation factor ELL	-
100575429	24.64606801	24.89208625	24.93307848	29.99213541	30.98231605	29.3553654	0.285448828	1.52E-06	9.73E-06	LOC100575429	NC_042495.1	89432348	89567110	+	4150	protein_coding	uncharacterized LOC100575429%2C transcript variant X1	-
100163533	38.69354298	35.81497184	37.86785668	31.15535717	30.94953958	31.38025944	-0.258932749	7.00E-05	0.000348836	LOC100163533	NC_042493.1	85627440	85636063	+	2620	protein_coding	hybrid signal transduction histidine kinase A	-
100167406	40.67067344	40.95528142	42.07650579	32.12886199	30.93418016	32.60300162	-0.363867212	1.53E-09	1.41E-08	LOC100167406	NC_042494.1	121147269	121175320	-	3117	protein_coding	protein white	ABC2_membrane
100571300	23.58099638	20.42785559	22.06918456	29.04827105	30.90757134	28.33791201	0.424510846	1.36E-08	1.13E-07	LOC100571300	NC_042494.1	102337337	102344570	-	3734	protein_coding	uncharacterized LOC100571300	HMG_box
100167613	28.86806276	25.93134498	21.51481273	32.32865587	30.88260623	29.47694691	0.285167741	0.01410352	0.040027207	LOC100167613	NC_042494.1	99895727	99896764	-	817	pseudogene	-	-
100160409	25.64808556	24.94860292	25.06714914	30.37567989	30.83426294	32.36884148	0.313039783	7.60E-06	4.42E-05	LOC100160409	NC_042496.1	13956757	13961346	+	2138	protein_coding	glyoxal reductase	Aldo_ket_red
100161760	28.08786381	26.77422666	26.39239902	29.32274359	30.80055421	31.2756044	0.175992297	0.008986763	0.027187759	LOC100161760	NC_042496.1	13826799	13831688	-	2743	protein_coding	integral membrane protein GPR155	-
100164023	27.26583423	31.27840874	29.83154924	35.89286998	30.78707119	33.47544574	0.187922334	0.01786035	0.049022746	LOC100164023	NC_042494.1	64348464	64391610	+	3016	protein_coding	cyclic AMP response element-binding protein A	bZIP_1
100162604	46.03894886	45.3265278	45.52792722	30.63461876	30.77707628	32.39653617	-0.538735033	5.32E-13	6.98E-12	LOC100162604	NC_042494.1	19557109	19559799	-	1209	protein_coding	eukaryotic translation initiation factor 3 subunit I-like	-
100161167	21.2669777	19.02552709	20.08387781	28.35307054	30.77702306	29.27505076	0.556493235	2.38E-15	3.82E-14	LOC100161167	NC_042494.1	85897847	85921664	+	3961	protein_coding	uncharacterized LOC100161167%2C transcript variant X1	-
100162692	20.18674315	22.00859621	19.84701029	28.43029418	30.75952689	28.39366024	0.50425821	1.03E-14	1.56E-13	LOC100162692	NC_042494.1	3610751	3631999	+	7051	protein_coding	fatty acid synthase%2C transcript variant X1	Acyl_transf_1
100169539	33.53332676	35.88729563	33.77984842	31.24731114	30.72472714	30.97699876	-0.144011942	0.01552847	0.043469245	LOC100169539	NC_042494.1	160244798	160253326	+	3900	protein_coding	ribosome biogenesis protein BMS1 homolog	-
100568673	105.0680573	82.82444682	90.50034753	26.41929113	30.71612596	29.37061254	-1.680354806	2.50E-61	2.95E-59	ACYPI45536	NC_042494.1	43012168	43026510	-	856	protein_coding	uncharacterized LOC100568673	CBM_14
100575901	14.66938404	17.24098508	13.76809234	33.37290871	30.70653419	32.03334082	1.07934017	1.47E-22	3.76E-21	ACYPI25566	NC_042495.1	68951120	68952014	-	895	protein_coding	uncharacterized LOC100575901	-
100161013	36.7019657	37.4090504	36.97755508	32.13393212	30.70000532	33.15448602	-0.204002515	0.001205582	0.004627851	LOC100161013	NC_042494.1	125553464	125559364	-	2835	protein_coding	splicing factor 3A subunit 1%2C transcript variant X2	ubiquitin
100163643	35.20969595	37.15532263	34.26577423	31.84332661	30.69907654	30.30929749	-0.192847905	0.005313892	0.017261124	LOC100163643	NC_042494.1	141091571	141096728	+	2081	protein_coding	ADP-ribosylation factor GTPase-activating protein 1%2C transcript variant X1	-
100168863	18.41360635	22.37804853	23.46401486	31.61961688	30.68430227	30.69169499	0.54203611	2.75E-08	2.21E-07	Vps72	NC_042494.1	3605686	3608704	-	1394	protein_coding	vacuolar protein sorting-associated protein 72 homolog	YL1
100167853	40.83054455	42.41340411	39.69903201	33.24122686	30.64410587	33.02852204	-0.336679733	3.65E-05	0.000191467	LOC100167853	NC_042496.1	9588681	9590452	-	1059	protein_coding	geminin-like	-
100572986	2.82825739	3.522490244	2.031317218	26.34038724	30.60617067	26.90600212	3.322713643	1.11E-93	2.74E-91	ACYPI56506	NC_042495.1	117826236	117827194	-	959	protein_coding	uncharacterized LOC100572986	-
100167187	40.62848017	37.55427417	36.91668054	32.84762645	30.5918754	30.73912766	-0.282966838	3.25E-05	0.000172265	LOC100167187	NC_042493.1	67786836	67794315	-	3306	protein_coding	histone-arginine methyltransferase CARMER%2C transcript variant X2	-
100161036	51.00029176	43.00266076	42.07995264	30.99030727	30.53528942	31.48975285	-0.543059045	1.39E-10	1.43E-09	LOC100161036	NC_042495.1	83407194	83436073	+	2024	protein_coding	ras-related protein Rab-38%2C transcript variant X3	Ras
100161111	35.72547493	37.54963606	34.44939064	32.51915872	30.529593	31.25336158	-0.18524304	0.004767966	0.015656119	LOC100161111	NC_042495.1	13669225	13674980	+	2951	protein_coding	DNA replication licensing factor Mcm7	MCM
100164118	37.32795248	33.09786416	34.12419345	30.92324218	30.40561507	29.13804245	-0.202367685	0.005030647	0.016442619	LOC100164118	NC_042494.1	7448100	7453490	+	2699	protein_coding	transcriptional repressor p66-alpha	-
100164171	39.40812251	30.11408778	33.71126804	24.39587367	30.39524068	28.39008373	-0.305712613	0.003324164	0.011393728	LOC100164171	NC_042495.1	115663664	115680110	+	2767	protein_coding	peptide transporter family 1	-
100159038	24.48737368	25.13667384	27.42941668	28.28321448	30.29067683	29.18804227	0.19537623	0.012417808	0.03592148	LOC100159038	NC_042495.1	95812473	95817987	-	1830	protein_coding	ancient ubiquitous protein 1	-
100168359	17.86499925	15.05160421	15.28652221	28.28713991	30.27684064	29.24030484	0.870733401	2.55E-25	7.50E-24	LOC100168359	NC_042494.1	64413957	64476942	+	2768	protein_coding	protein goliath%2C transcript variant X4	-
100159559	34.47052469	33.90951288	34.0169774	26.86820253	30.27014116	27.59536696	-0.266439321	5.75E-05	0.000291498	LOC100159559	NC_042495.1	111860251	111884401	-	3713	protein_coding	lysosomal alpha-mannosidase%2C transcript variant X2	-
100167894	43.53512142	41.55800758	40.59132107	31.81482506	30.23807228	34.12670293	-0.379887756	1.29E-06	8.37E-06	LOC100167894	NC_042494.1	61134186	61137504	-	1423	protein_coding	nuclear transcription factor Y subunit alpha	CBFB_NFYA
100162414	36.26693579	35.06408916	32.93238593	28.98615195	30.22979912	27.59997192	-0.257771166	0.00026567	0.001177052	LOC100162414	NC_042495.1	106327159	106356550	-	2688	protein_coding	serine/threonine-protein kinase NLK%2C transcript variant X1	Pkinase
100167566	35.6677751	34.90413665	35.25249385	28.37543396	30.22598658	27.86377217	-0.28466601	6.96E-05	0.000346773	LOC100167566	NC_042494.1	25572365	25575983	+	1803	protein_coding	major facilitator superfamily domain-containing protein 10	MFS_1
100168936	22.79953096	23.60883476	24.18457601	26.71913415	30.22527132	28.73540139	0.286661642	0.000484779	0.002048301	LOC100168936	NC_042496.1	31406122	31423926	-	1581	protein_coding	uncharacterized LOC100168936	-
100168970	36.77973816	33.42168679	34.41374356	31.08053942	30.13955353	28.31681574	-0.217924945	0.00088265	0.003496252	LOC100168970	NC_042494.1	67162389	67182243	-	5891	protein_coding	nuclear pore complex protein Nup153%2C transcript variant X2	-
100160746	34.57586128	36.19508168	33.92429308	31.33864416	30.07455606	32.32087446	-0.152868122	0.01783009	0.048965244	LOC100160746	NC_042493.1	125572142	125579940	-	2990	protein_coding	WD repeat-containing protein 3	-
115033506	16.56812081	14.24618066	15.72504226	29.26926238	30.0729515	23.57257456	0.839929011	2.48E-07	1.76E-06	LOC115033506	NC_042494.1	14771876	14776251	+	363	protein_coding	proclotting enzyme-like	Trypsin
100165413	39.54391183	37.580064	37.96899012	25.81681668	30.06137895	27.47859168	-0.458886121	1.87E-10	1.91E-09	LOC100165413	NC_042493.1	60469816	60492724	-	3175	protein_coding	uncharacterized LOC100165413%2C transcript variant X2	-
100165511	33.90898128	35.2633448	35.33964082	30.49133534	30.05104755	29.03871013	-0.215125184	0.004079089	0.013620272	LOC100165511	NC_042495.1	102743793	102745463	-	1405	protein_coding	solute carrier family 35 member E1 homolog	-
100572711	51.4622805	56.72669231	55.38072586	34.04863714	30.03701106	29.4349692	-0.798960424	7.04E-20	1.54E-18	LOC100572711	NC_042495.1	97609268	97611416	+	980	lncRNA	selenoprotein K	-
100160013	32.90531647	36.40614995	35.06311478	30.66361267	30.02826129	30.21858551	-0.191889551	0.015097728	0.042406419	LOC100160013	NC_042495.1	54247647	54249152	-	1283	protein_coding	CG13392-like	-
100574827	20.80770782	17.58083813	21.59357243	22.17799646	30.01339277	27.89069652	0.423644475	0.001213502	0.004650552	ACYPI44516	NC_042495.1	76717468	76718302	-	835	protein_coding	uncharacterized LOC100574827	-
100158946	43.91588447	50.28789953	44.70840186	16.16365459	30.01041163	22.80849187	-1.003263449	8.72E-05	0.000426343	LOC100158946	NC_042495.1	80943509	80956963	-	2133	protein_coding	uncharacterized LOC100158946	-
115034099	41.76220855	44.30761751	41.97405224	32.22417829	30.01001494	32.78282522	-0.423568111	5.15E-10	5.04E-09	LOC115034099	NC_042495.1	68720792	68724861	+	2259	protein_coding	ran GTPase-activating protein 1	-
100166461	321.1027699	149.7888241	240.6727078	22.49046007	29.99908554	29.81847144	-3.106724039	3.82E-21	8.91E-20	cp11	NC_042494.1	62627560	62628631	+	960	protein_coding	cuticular protein 11	Chitin_bind_4
100162815	34.94104782	35.94246776	36.92822573	33.14627695	29.97300793	31.43632156	-0.182127553	0.005878098	0.018857004	LOC100162815	NC_042496.1	40218773	40226590	-	3105	protein_coding	acetyl-CoA acetyltransferase%2C cytosolic%2C transcript variant X2	Thiolase_N
100169162	17.36677971	9.064051939	15.87222553	33.39584055	29.96566424	29.23035033	1.135956352	8.93E-11	9.39E-10	cp36	NC_042494.1	62320638	62321630	+	842	protein_coding	cuticular protein 36	Chitin_bind_4
100162550	32.21284279	33.76992668	34.68477871	27.04448722	29.96485477	27.90522671	-0.238186921	0.001702126	0.006297946	LOC100162550	NC_042495.1	7735954	7738302	+	1745	protein_coding	enhancer of split mgamma protein	Hairy_orange
100169301	33.52931355	35.5729271	33.56264979	30.29349693	29.96202788	29.4217862	-0.188211979	0.00790232	0.024379137	LOC100169301	NC_042496.1	8152160	8155734	+	1748	protein_coding	protein pelota	-
103309145	35.42536174	36.61759948	34.68518436	32.10977007	29.95198449	29.8347746	-0.209031435	0.002971475	0.010301244	LOC103309145	NC_042494.1	11654529	11656569	+	1984	protein_coding	putative GTP-binding protein 6	-
100166766	23.2245772	23.30097972	23.85686075	27.67655122	29.92845361	28.60914171	0.299778585	0.000655716	0.002679227	LOC100166766	NC_042494.1	45961036	45962362	+	1090	protein_coding	sorting nexin-22	PX
100570729	26.90439982	25.66180138	26.85622039	32.55835667	29.89465556	30.93792435	0.240554547	0.000556087	0.002317324	LOC100570729	NC_042495.1	1783622	1787233	-	2532	protein_coding	zinc finger CCHC domain-containing protein 7	-
100164103	24.736802	21.0628177	22.05103788	28.76831996	29.87832941	26.16390965	0.328332987	1.22E-05	6.88E-05	LOC100164103	NC_042495.1	45069526	45147634	+	20105	protein_coding	dystonin%2C transcript variant X5	CH
100160916	22.79776363	25.669518	27.00620863	36.8792592	29.85026311	36.91059311	0.465732095	0.000126889	0.000601541	LOC100160916	NC_042496.1	37356699	37357317	-	619	protein_coding	late histone H2B.L4-like	Histone
100162284	37.34931369	34.23562339	34.23211592	31.03760425	29.82916516	30.52694446	-0.205156647	0.003566332	0.01210803	LOC100162284	NC_042494.1	42046392	42050253	+	2267	protein_coding	leukotriene A-4 hydrolase	-
107883030	11.90599406	12.43116245	10.45456106	36.1050864	29.81529264	32.86852962	1.510193014	1.33E-13	1.84E-12	LOC107883030	NC_042494.1	13842099	13842432	+	208	lncRNA	uncharacterized LOC107883030	-
100166463	26.87159384	26.50614391	26.3653599	31.96412265	29.7791356	28.96137992	0.192651387	0.005916844	0.018969731	LOC100166463	NC_042495.1	72572801	72581678	+	2519	protein_coding	peptidyl-alpha-hydroxyglycine alpha-amidating lyase 1%2C transcript variant X1	NHL
100161059	37.10656956	37.46858597	36.43222955	29.44429083	29.75584596	29.55891683	-0.316008792	2.17E-06	1.36E-05	LOC100161059	NC_042496.1	6632612	6647197	+	1910	protein_coding	coiled-coil domain-containing protein 50%2C transcript variant X2	-
100164192	20.10661356	21.28677355	19.47893666	30.34578125	29.73899441	29.4422598	0.563283762	1.89E-20	4.26E-19	LOC100164192	NC_042496.1	18642008	18670808	-	5519	protein_coding	collagen alpha-1(I) chain	Collagen
100167049	22.95570886	23.47921358	22.71603737	29.62579445	29.70337447	28.25388013	0.347741342	1.34E-07	9.88E-07	LOC100167049	NC_042494.1	64943631	64949908	-	2810	protein_coding	mpv17-like protein	Mpv17_PMP22
100160665	32.50319995	30.57028637	32.17873788	23.69013774	29.54162829	26.77601945	-0.245062876	0.002555763	0.009013304	LOC100160665	NC_042495.1	50238067	50311066	+	4049	protein_coding	A disintegrin and metalloproteinase with thrombospondin motifs 1%2C transcript variant X2	-
100165015	36.66246739	36.29351225	37.06617105	26.29412689	29.53564356	27.12937859	-0.400491919	1.24E-09	1.17E-08	LOC100165015	NC_042494.1	46784219	46816426	-	3476	protein_coding	sphingomyelin phosphodiesterase%2C transcript variant X1	Metallophos
100160549	33.8994874	37.37784868	34.69538409	31.78704293	29.51632757	31.01503422	-0.191965295	0.005068479	0.016549131	LOC100160549	NC_042496.1	22008973	22013163	-	2776	protein_coding	cysteine--tRNA ligase%2C cytoplasmic%2C transcript variant X1	tRNA-synt_1e
100166457	22.32381682	22.19160353	21.56468866	27.75314472	29.51469993	28.49795648	0.382742567	7.62E-10	7.33E-09	LOC100166457	NC_042494.1	22054870	22137509	-	3939	protein_coding	calcium uniporter protein%2C mitochondrial	-
100163689	24.87419105	25.40134549	22.19115164	31.22169334	29.46884773	30.27157385	0.333875431	7.84E-05	0.000387287	LOC100163689	NC_042494.1	142417183	142426217	+	1476	protein_coding	glutaminyl-peptide cyclotransferase	-
100163009	20.58090111	25.38019452	21.61604959	30.63071129	29.36952193	29.20543045	0.407953536	1.43E-05	8.02E-05	LOC100163009	NC_042495.1	11932675	11960052	-	1400	protein_coding	uncharacterized LOC100163009%2C transcript variant X1	-
100160146	34.34187823	37.55583774	35.94445557	32.3317145	29.3570596	31.19190841	-0.208321855	0.003030391	0.010480157	LOC100160146	NC_042494.1	17529758	17535613	-	2493	protein_coding	pre-rRNA-processing protein TSR1 homolog	-
100160860	52.29808898	54.76326327	53.87477004	32.54946467	29.3459126	29.20906164	-0.813691466	5.99E-28	1.99E-26	LOC100160860	NC_042494.1	63566935	63571564	-	1501	protein_coding	1%2C5-anhydro-D-fructose reductase	Aldo_ket_red
100163148	24.37047824	23.86080932	24.84475291	27.07473236	29.2930729	28.76352405	0.227133337	0.000973657	0.003819341	LOC100163148	NC_042494.1	10557511	10563198	+	2613	protein_coding	transmembrane protein 104 homolog	Aa_trans
100169159	22.1010049	24.96084061	22.59552701	30.32253603	29.27487384	28.25349192	0.341970291	0.000121683	0.000578424	LOC100169159	NC_042495.1	63333884	63339231	-	1213	protein_coding	plexin domain-containing protein 2	-
100158918	34.84986554	33.52035453	35.24625157	30.85161017	29.17493789	29.5277406	-0.203485634	0.007201579	0.022472173	LOC100158918	NC_042495.1	76969632	76974636	-	1437	protein_coding	protein phosphatase PTC7 homolog	SpoIIE
100166802	31.90923227	36.11203877	34.84228938	31.31759361	29.08937622	30.25369114	-0.174813715	0.01390164	0.039532476	LOC100166802	NC_042494.1	105052155	105056980	-	2789	protein_coding	transducin beta-like protein 3	WD40
100162918	21.37205995	23.2022296	21.89094038	34.60284667	29.05366899	31.90384506	0.530928654	3.69E-12	4.45E-11	LOC100162918	NC_042495.1	48693474	48832476	+	4348	protein_coding	polypyrimidine tract-binding protein 2%2C transcript variant X1	-
100568675	10.55876986	10.82472093	10.95356594	30.87897366	29.02993719	29.41975537	1.47320847	3.99E-92	9.39E-90	LOC100568675	NC_042496.1	30114969	30158120	+	2982	protein_coding	nose resistant to fluoxetine protein 6%2C transcript variant X3	-
100165676	8.639706245	11.7491431	10.09446343	32.28588614	29.02304276	29.49898876	1.582896357	6.05E-56	5.86E-54	LOC100165676	NC_042495.1	96821282	96859292	-	2971	protein_coding	laccase-1%2C transcript variant X2	-
100162156	26.82930898	27.07535042	26.76301299	32.66215035	28.99149397	30.40445306	0.197423029	0.014530958	0.041055681	LOC100162156	NC_042495.1	101422588	101425202	-	1471	protein_coding	palmitoyltransferase ZDHHC6	-
100163107	164.5707948	105.1040333	128.3199431	18.15262744	28.96272406	25.31073878	-2.452615329	5.02E-20	1.11E-18	LOC100163107	NC_042494.1	58232235	58246006	+	1361	protein_coding	uncharacterized LOC100163107	-
100159032	23.11252093	22.99068878	22.56900819	26.53247997	28.95527497	26.16368295	0.256469819	0.000120326	0.000572665	LOC100159032	NC_042496.1	15096696	15101772	-	3842	protein_coding	sodium/hydrogen exchanger 8	Na_H_Exchanger
100168097	22.31337315	22.43447785	21.4030384	25.33605773	28.94610265	25.54253685	0.277671568	0.00027486	0.001213675	LOC100168097	NC_042494.1	46447183	46489301	-	2794	protein_coding	forkhead box protein O	Fork_head
100159886	15.87838257	18.53535333	17.55588032	30.85200024	28.94545359	30.0085143	0.796897628	2.99E-21	7.05E-20	LOC100159886	NC_042494.1	95886206	95898752	-	1827	protein_coding	venom protease%2C transcript variant X3	Trypsin
100162216	25.72764213	25.04785862	26.11715255	28.94164914	28.93868194	30.00546725	0.19959376	0.001839183	0.006743385	LOC100162216	NC_042493.1	64767517	64773764	+	2987	protein_coding	arginine/serine-rich protein PNISR	-
100573198	23.30853265	24.5353432	23.52391938	28.9564275	28.76899929	27.76484661	0.267493995	0.000638168	0.002617204	LOC100573198	NC_042494.1	93762440	93765176	+	1506	lncRNA	uncharacterized LOC100573198	-
100168438	21.75793874	22.05401841	22.55113045	25.94228098	28.73020192	26.50916178	0.297933947	0.000262368	0.001164054	LOC100168438	NC_042494.1	20232685	20236693	-	1579	protein_coding	deoxyribose-phosphate aldolase-like%2C transcript variant X2	-
100161597	35.45592516	33.44510664	32.89777001	30.4824259	28.72784616	28.4937965	-0.208516648	0.001937607	0.007057534	LOC100161597	NC_042496.1	3147736	3151066	+	2969	protein_coding	gastrula zinc finger protein XlCGF57.1%2C transcript variant X1	-
100568923	45.48907969	47.82097656	43.44578582	27.52066026	28.70670055	28.39207125	-0.685929356	1.48E-24	4.17E-23	LOC100568923	NC_042494.1	76907861	76918354	-	2366	lncRNA	uncharacterized LOC100568923	-
100167076	34.07997093	35.66184369	35.64525224	30.20321847	28.70448309	32.32101462	-0.201222887	0.007967631	0.024556616	LOC100167076	NC_042495.1	37385490	37402404	+	1684	protein_coding	alkaline phosphatase	-
100159795	23.63302805	20.65947776	21.7587142	23.49426093	28.65877371	26.36788207	0.255700802	0.002613407	0.009196979	LOC100159795	NC_042494.1	28802884	28812768	-	4110	protein_coding	protein phosphatase 1 regulatory subunit 3B%2C transcript variant X3	-
100164261	21.38488903	21.35495166	21.28447823	28.3053911	28.64209893	27.44932539	0.405397184	6.51E-13	8.44E-12	LOC100164261	NC_042493.1	22606728	22718000	+	5849	protein_coding	CD109 antigen%2C transcript variant X1	A2M_comp
100164615	24.53240436	26.24874012	24.73658312	29.5088888	28.63842758	30.05683322	0.230865306	0.001259854	0.004805784	LOC100164615	NC_042494.1	8405143	8409324	-	2075	protein_coding	ankyrin repeat%2C SAM and basic leucine zipper domain-containing protein 1%2C transcript variant X2	SAM_1
100570401	21.67462888	19.30503103	21.52591039	27.53630081	28.62615077	30.1756184	0.472510115	6.99E-08	5.34E-07	LOC100570401	NC_042494.1	139754411	139764389	-	1469	protein_coding	fructose-1%2C6-bisphosphatase 1%2C transcript variant X2	-
100167732	31.7951318	35.83933703	34.25012766	29.14267305	28.6147599	29.40496414	-0.217782677	0.007318346	0.022813978	LOC100167732	NC_042494.1	125181326	125184792	-	1287	protein_coding	methyltransferase-like protein 5-like	-
100160505	34.34052743	34.20610749	33.73176198	30.52425476	28.5891427	27.37763881	-0.234985423	9.39E-05	0.000456079	LOC100160505	NC_042495.1	86888313	86912805	+	7564	protein_coding	E3 SUMO-protein ligase RanBP2%2C transcript variant X1	zf-RanBP
100166988	41.29619626	44.63323494	44.2850508	28.34654958	28.57623938	44.04549754	-0.360569499	0.011866494	0.034522899	Mrps10	NC_042495.1	1116016	1118324	-	712	protein_coding	mitochondrial ribosomal protein S10	Ribosomal_S10
100168046	21.96467316	22.94450302	22.44234071	26.95962199	28.56737332	28.12729252	0.319638915	9.07E-08	6.86E-07	LOC100168046	NC_042494.1	130146348	130154380	-	4764	protein_coding	OTU domain-containing protein 7B%2C transcript variant X4	OTU
100168653	35.06226229	36.60192981	33.02759423	29.54150473	28.55856093	29.7603509	-0.246287219	0.000162301	0.000750431	LOC100168653	NC_042495.1	86632989	86642861	+	3351	protein_coding	inhibitor of growth protein 3%2C transcript variant X1	-
100161693	18.56012318	22.04257135	19.79416542	30.19050469	28.52726003	31.98489228	0.593909963	1.45E-10	1.49E-09	LOC100161693	NC_042495.1	48355216	48360448	+	1419	protein_coding	retinol dehydrogenase 12-like	adh_short
100168641	37.01993153	39.18199761	37.2361246	28.65547841	28.5258217	28.05024137	-0.405506259	6.05E-09	5.26E-08	LOC100168641	NC_042494.1	70481455	70490983	+	1769	protein_coding	uncharacterized LOC100168641	-
100164651	33.73409766	35.45570503	33.49423355	30.95610596	28.52419349	29.69976418	-0.196555188	0.003146033	0.010839694	LOC100164651	NC_042495.1	108409401	108413828	+	2743	protein_coding	DNA replication licensing factor MCM3%2C transcript variant X2	MCM
100571000	41.62162756	35.84914426	38.30902806	25.4178355	28.51981354	26.5955181	-0.517417529	1.47E-11	1.67E-10	LOC100571000	NC_042494.1	77200321	77237667	+	3433	protein_coding	uncharacterized LOC100571000	-
100159302	13.98537181	17.06650121	17.14619446	22.11574705	28.48356403	25.15351434	0.660515651	1.16E-08	9.77E-08	LOC100159302	NC_042495.1	65668296	65694128	+	1366	protein_coding	PDZ domain-containing protein GIPC1	PDZ
100166278	17.60909088	19.87316833	20.20817123	26.72267903	28.4345135	26.69955817	0.512873565	3.85E-09	3.44E-08	LOC100166278	NC_042494.1	10026264	10030248	-	1576	protein_coding	hydroxysteroid (17-beta) dehydrogenase 8-like%2C transcript variant X3	-
100166523	22.3511708	26.4522154	23.17157919	26.58594699	28.41599379	27.62308297	0.206199119	0.014564473	0.041135641	LOC100166523	NC_042494.1	112051209	112056752	-	1873	protein_coding	ring finger protein 5-like%2C transcript variant X1	zf-C3HC4
100164011	15.03909218	11.58290094	13.42191271	36.22914236	28.41093941	31.87868094	1.275474863	5.95E-34	2.55E-32	LOC100164011	NC_042494.1	134224258	134249837	+	4101	protein_coding	ATP-binding cassette sub-family G member 4	ABC_tran
100160741	22.57448079	22.30649404	22.69275858	29.29171682	28.38641152	27.65742837	0.343650364	7.61E-06	4.42E-05	LOC100160741	NC_042495.1	75429600	75434223	+	1649	protein_coding	tetratricopeptide repeat protein 4	-
100164718	24.02404822	23.18682758	22.84552037	25.94282093	28.38507986	26.53721074	0.213459879	0.001836199	0.006734011	LOC100164718	NC_042495.1	56549344	56573456	+	3153	protein_coding	protein cueball	-
100572202	7.556918864	6.670032235	7.538318398	30.3306057	28.34059463	28.57364447	2.00998917	1.13E-46	8.41E-45	LOC100572202	NW_021770540.1	498492	499259	+	619	protein_coding	protein KRTCAP2 homolog	-
100162488	23.26580158	24.37578668	24.59669584	27.57964293	28.31772087	29.8936893	0.255214267	0.004002424	0.01339243	LOC100162488	NC_042494.1	134381407	134382966	-	1083	protein_coding	Golgi SNAP receptor complex member 1	-
100569251	33.46881266	41.88677458	39.71797819	18.99092304	28.29120615	25.15115612	-0.66076784	3.09E-08	2.47E-07	LOC100569251	NC_042493.1	79725816	79734472	+	3204	protein_coding	putative uncharacterized protein DDB_G0271606%2C transcript variant X2	-
100165880	21.96536744	21.24592381	21.72300651	25.39695582	28.2833547	26.34789464	0.308209265	5.54E-06	3.28E-05	LOC100165880	NC_042494.1	108731593	108735394	+	3708	protein_coding	transcription factor SPT20 homolog	-
100162298	24.58235051	25.98269068	26.76154817	31.28188784	28.27199348	30.38052519	0.225226867	0.001176655	0.004538895	LOC100162298	NC_042494.1	164923330	164977813	-	3406	protein_coding	UNC93-like protein	-
100163127	26.06856609	25.99170254	25.55333045	30.1368675	28.23151251	29.58400069	0.187121848	0.002165162	0.007783475	LOC100163127	NC_042494.1	115830157	115854676	-	4106	protein_coding	putative homeodomain transcription factor	-
100165551	38.3778078	37.06653953	36.48963555	27.65341068	28.15219462	27.58037553	-0.418229701	5.06E-12	6.02E-11	LOC100165551	NC_042495.1	14953457	14963196	+	3336	protein_coding	zinc finger and BTB domain-containing protein 18	BTB
100163821	32.52909038	30.4636435	30.75691541	26.80454142	28.11583966	26.20807127	-0.202070049	0.001833436	0.006725439	LOC100163821	NC_042494.1	19980683	19989549	-	3647	protein_coding	zinc finger protein 226%2C transcript variant X2	-
100574942	24.51211825	23.45739685	23.15382778	29.65413581	28.04970566	28.8642563	0.289824014	0.000110383	0.000529818	LOC100574942	NC_042495.1	115613883	115616449	-	1849	protein_coding	RCC1 domain-containing protein 1%2C transcript variant X1	-
100166972	35.54288673	40.60993751	36.74188259	30.40632366	28.03900314	30.62052368	-0.335034763	0.000571093	0.002372338	LOC100166972	NC_042494.1	145513239	145515188	+	762	protein_coding	coiled-coil domain-containing protein 12	-
100165110	21.66117305	20.59171214	21.16355004	29.99519317	28.0093701	28.39977838	0.452961165	1.54E-13	2.10E-12	LOC100165110	NC_042495.1	75531627	75568052	+	5602	protein_coding	broad-complex core protein isoforms 1/2/3/4/5%2C transcript variant X2	BTB
100569509	8.577164351	7.971267901	8.904296315	36.15949498	27.97763998	32.33451824	1.929517067	1.89E-83	3.77E-81	LOC100569509	NC_042494.1	103575258	103611649	+	2956	protein_coding	ABC transporter G family member 23%2C transcript variant X1	ABC_tran
100574348	31.38267817	30.94155809	33.22344746	27.40557356	27.97601228	26.83532052	-0.209586761	0.001786975	0.006577931	LOC100574348	NC_042495.1	63363250	63366508	+	2569	lncRNA	uncharacterized LOC100574348	-
100161961	15.2095154	15.15376093	14.49836886	31.93330903	27.96253851	28.93555764	0.99212685	4.39E-36	2.15E-34	LOC100161961	NC_042494.1	12417200	12423186	-	2631	protein_coding	fatty acyl-CoA hydrolase precursor%2C medium chain	COesterase
100168757	24.07646273	23.96109316	23.91023224	28.48818575	27.94066587	26.81222196	0.217206597	0.000252647	0.001124405	Gnao1	NC_042494.1	33597137	33637936	-	4769	protein_coding	guanine nucleotide binding protein (G protein)%2C alpha activating activity polypeptide O	G-alpha
100167583	22.13567743	22.3295452	21.37598491	29.53158169	27.91263085	29.88569924	0.413935657	9.84E-09	8.36E-08	LOC100167583	NC_042495.1	104494338	104497590	-	2202	protein_coding	pre-mRNA-splicing factor Slu7	-
100534636	7.313242567	9.504756764	6.321362504	23.81561725	27.85673471	26.36189227	1.758078254	1.36E-22	3.51E-21	LOC100534636	NC_042495.1	17449710	17453573	-	430	misc_RNA	uncharacterized LOC100534636%2C transcript variant X2	-
100163525	24.849871	24.89182504	25.43994465	29.1928192	27.85247141	28.14310324	0.187324523	0.008142518	0.025007691	LOC100163525	NC_042495.1	68203195	68216957	+	2039	protein_coding	synapsin	-
100165299	40.34128165	40.56459115	40.47848688	30.2035063	27.85028245	28.63774196	-0.478719874	5.48E-14	7.81E-13	LOC100165299	NC_042494.1	93685495	93692160	+	2817	protein_coding	uncharacterized LOC100165299	SET
115034179	35.78371575	42.66782931	41.27136844	31.1326097	27.8464001	32.72101308	-0.377239901	3.94E-05	0.000205259	LOC115034179	NC_042495.1	110531471	110532942	-	1472	transcribed_pseudogene	coatomer subunit delta pseudogene	Adap_comp_sub
100162967	33.49764754	34.89153683	34.09258308	29.50536422	27.8020259	29.93258401	-0.225446549	0.001498883	0.005623752	LOC100162967	NC_042496.1	21478322	21481824	+	1867	protein_coding	actin-like protein 6B	Actin
100162079	44.30959584	37.99053873	41.61612926	20.26109738	27.74288967	22.9078149	-0.79897124	1.09E-15	1.80E-14	LOC100162079	NC_042495.1	88177052	88189645	-	5345	protein_coding	chitin synthase chs-2%2C transcript variant X1	-
103309054	34.20077138	33.14372502	33.44409491	29.59152112	27.71776915	30.04871688	-0.199770323	0.004204127	0.013978612	LOC103309054	NC_042494.1	160223474	160225597	+	2124	protein_coding	serine/threonine-protein phosphatase 4 regulatory subunit 2	-
100575887	20.25396331	21.20570084	21.4997753	26.61428865	27.69377108	23.57381023	0.314663317	0.002667811	0.009370003	LOC100575887	NC_042494.1	30160244	30161581	-	885	protein_coding	coatomer subunit zeta-1	-
100164136	36.23440378	36.65874108	38.94370585	26.72557471	27.65520734	27.59663746	-0.44082776	4.21E-09	3.73E-08	LOC100164136	NC_042493.1	80035538	80044533	+	1496	protein_coding	phosphatidylglycerophosphatase and protein-tyrosine phosphatase 1%2C transcript variant X1	DSPc
100159160	18.56311282	20.98235529	19.85366582	23.59740647	27.65085002	25.97469072	0.385738016	1.62E-06	1.03E-05	LOC100159160	NC_042496.1	39864012	39868813	-	3206	protein_coding	probable cyclin-dependent serine/threonine-protein kinase DDB_G0292550	-
100165881	35.91361389	39.75291898	37.30675968	30.5951022	27.50838902	29.71434426	-0.356297749	3.65E-07	2.52E-06	LOC100165881	NC_042495.1	74329848	74347125	-	3184	protein_coding	inactive peptidyl-prolyl cis-trans isomerase FKBP6%2C transcript variant X2	FKBP_C
100162898	52.52365806	43.06021026	47.24078391	28.05100441	27.48805282	26.9964737	-0.784886713	1.11E-21	2.69E-20	LOC100162898	NC_042495.1	106166073	106185908	+	2338	protein_coding	uncharacterized LOC100162898	-
100164493	35.5541123	42.74369478	38.19156513	35.54622634	27.48277145	32.16473236	-0.283844808	0.006968496	0.02184856	LOC100164493	NC_042494.1	157962913	157965971	+	1204	protein_coding	3-hydroxyacyl-CoA dehydrogenase type-2-like%2C transcript variant X2	-
115033801	96.82276477	60.91106137	74.22164095	29.12490254	27.44583961	29.03517057	-1.432444452	2.39E-28	8.10E-27	LOC115033801	NC_042494.1	98793539	98794691	-	1153	protein_coding	repetitive proline-rich cell wall protein 2-like	-
100161964	24.3356296	23.73459922	22.96771197	27.70357127	27.44434676	26.98875254	0.215811573	0.002205259	0.007914553	LOC100161964	NC_042494.1	87959624	87978095	-	2221	protein_coding	uncharacterized LOC100161964	-
100169565	20.22186592	18.53887448	17.5566717	26.58747037	27.4032048	27.78500981	0.543360625	2.49E-09	2.27E-08	LOC100169565	NC_042494.1	50749424	50752307	-	1316	protein_coding	protein 5NUC	-
100165749	37.7013271	43.69408484	40.56901683	26.81150504	27.36564847	26.87327822	-0.582267642	3.09E-15	4.90E-14	LOC100165749	NC_042495.1	23431	41952	-	2201	protein_coding	probable ATP-dependent RNA helicase DDX31	DEAD
100161028	33.81670717	36.07664893	32.67737208	29.77643539	27.24295588	28.15953936	-0.261258826	0.000213218	0.000963327	LOC100161028	NC_042496.1	5109381	5115424	+	2727	protein_coding	WD repeat-containing protein 75%2C transcript variant X1	-
novel.316	1.100398473	2.075498351	0.915925775	28.8003531	27.21672083	12.07295573	4.063108471	1.50E-14	2.23E-13	-	NC_042494.1	134973603	134974245	+	643	-	-	-
100159350	30.59246387	31.7435802	31.33679569	27.74028077	27.20154099	28.43827964	-0.161018085	0.010055844	0.029883416	LOC100159350	NC_042494.1	67243990	67254740	-	2981	protein_coding	LON peptidase N-terminal domain and RING finger protein 1%2C transcript variant X4	-
100162203	29.39314363	33.71100939	31.79578526	24.7374909	27.19868173	27.47061013	-0.249973663	0.00165411	0.006139	LOC100162203	NC_042494.1	45411390	45418447	+	2113	protein_coding	uncharacterized LOC100162203%2C transcript variant X1	-
100168721	31.9415441	34.31038237	34.28127077	29.00334601	27.13418216	30.73743721	-0.203574123	0.006064435	0.019356379	LOC100168721	NC_042495.1	85353905	85357753	+	2273	protein_coding	another transcription unit protein%2C transcript variant X1	-
100162356	21.40420961	20.48903936	19.68492675	26.79929155	27.13020354	25.22661359	0.368613106	1.85E-07	1.34E-06	LOC100162356	NC_042496.1	16724118	16755692	+	3100	protein_coding	putative phospholipase B-like lamina ancestor%2C transcript variant X2	-
100159569	31.61046714	38.02119957	32.6472245	26.43470006	27.10345699	26.71852661	-0.342670658	1.11E-05	6.29E-05	LOC100159569	NC_042494.1	131915034	131922857	-	3125	protein_coding	inter-alpha-trypsin inhibitor heavy chain H4	VWA
100162397	22.26986383	21.79736102	22.01809196	24.15340706	27.07523649	26.73243003	0.24497126	0.001595232	0.005943218	LOC100162397	NC_042494.1	100830849	100840944	+	2074	protein_coding	cytohesin-1	Sec7
115033061	32.88055367	30.91042746	34.27046115	27.30857444	27.03509469	27.76174555	-0.249118292	0.007456405	0.023198473	LOC115033061	NC_042495.1	37092529	37094571	-	850	protein_coding	DDB1- and CUL4-associated factor 12-like%2C transcript variant X2	-
100163792	33.03480377	38.94521932	34.31256113	24.19515129	27.01934597	24.85683707	-0.475445881	3.25E-08	2.59E-07	LOC100163792	NC_042494.1	111630230	111643335	-	1723	protein_coding	delta-like protein A%2C transcript variant X2	EGF
100159875	30.10431171	30.43680601	32.02043514	28.00996211	27.01895948	26.80579286	-0.170460223	0.008478016	0.025836906	LOC100159875	NC_042494.1	81491397	81497929	-	2998	protein_coding	apoptosis inhibitor 5	-
100165397	23.31678543	22.28119715	23.63734613	28.66530303	26.98319976	27.84952001	0.27710792	1.27E-05	7.19E-05	LOC100165397	NC_042495.1	111694716	111719375	-	4159	protein_coding	nuclear hormone receptor FTZ-F1 beta%2C transcript variant X1	Hormone_recep
100160073	25.19827258	20.75258035	24.40230614	27.18277548	26.95824462	26.83349416	0.209316421	0.013278769	0.038028525	LOC100160073	NC_042494.1	40009755	40095717	-	2510	protein_coding	MFS-type transporter SLC18B1%2C transcript variant X3	MFS_1
100160715	15.23387417	15.84473752	15.83172778	22.99802241	26.94750857	23.39749834	0.651918441	3.85E-14	5.57E-13	LOC100160715	NC_042494.1	25556523	25567536	+	2232	protein_coding	serine protease Hayan%2C transcript variant X1	Trypsin
100169152	32.46226199	33.55140527	36.12438971	26.18824341	26.92532108	29.78820419	-0.293735228	0.002486341	0.008801212	rtv	NC_042494.1	106748331	106749174	-	844	protein_coding	retroactive	-
100569872	17.54592074	15.52992921	17.87545172	19.78272193	26.9210392	25.18094648	0.50316114	0.000148553	0.000692588	LOC100569872	NC_042494.1	103149091	103152946	+	811	lncRNA	uncharacterized LOC100569872	-
100168129	21.38620003	21.68636339	22.11316433	26.39334142	26.91414687	23.57511038	0.245292207	0.000726606	0.002934134	LOC100168129	NC_042494.1	33286714	33304897	+	3450	protein_coding	histone-lysine N-methyltransferase%2C H3 lysine-79 specific	DOT1
100572968	33.67753288	47.15687771	40.67197458	35.45912993	26.88017314	26.86934831	-0.437700894	0.000546364	0.002281021	LOC100572968	NC_042494.1	10214479	10224579	+	1438	protein_coding	histidine-rich glycoprotein	-
100169222	31.90120709	29.59521137	31.25440207	25.73311788	26.8007001	26.11355482	-0.231343454	0.000330451	0.001438213	LOC100169222	NC_042494.1	21398780	21474575	+	3444	protein_coding	bifunctional heparan sulfate N-deacetylase/N-sulfotransferase	Sulfotransfer_1
100168735	33.1611561	30.75056926	33.22227183	21.92300188	26.78473147	25.22636397	-0.387173676	8.41E-06	4.86E-05	LOC100168735	NC_042494.1	144769377	144777532	+	1995	protein_coding	N-acetylgalactosamine kinase	GHMP_kinases
100166070	32.74465758	36.78164764	37.78156633	25.42979956	26.74149456	24.38185126	-0.479160753	2.05E-07	1.47E-06	Tmem208	NC_042494.1	1606069	1608748	+	1042	protein_coding	transmembrane protein 208	-
100167569	33.94840441	32.59811541	32.96741316	27.85869552	26.67026755	27.19543497	-0.27746432	2.11E-06	1.33E-05	LOC100167569	NC_042494.1	50611204	50638556	+	4598	protein_coding	axin%2C transcript variant X3	DIX
100569638	36.44700698	35.49890869	37.90963236	21.40309522	26.57334926	25.89989241	-0.565712676	2.82E-09	2.56E-08	LOC100569638	NC_042494.1	77340914	77351058	-	1250	protein_coding	kynurenine/alpha-aminoadipate aminotransferase%2C mitochondrial	Aminotran_1_2
100162407	27.59069912	30.96278943	29.05534758	23.55697321	26.5669331	23.89813401	-0.235871343	0.003754748	0.012665952	LOC100162407	NC_042495.1	16612514	16616694	+	1949	protein_coding	dihydroorotate dehydrogenase (quinone)%2C mitochondrial%2C transcript variant X1	DHO_dh
100164230	33.0154953	29.60922039	30.88847587	25.36835845	26.55213489	24.28925738	-0.28872962	0.000110636	0.00053055	LOC100164230	NC_042494.1	129672293	129679333	-	2486	protein_coding	RNA-binding protein MEX3D	KH_1
100168760	22.37906297	21.62315133	20.78136563	27.1976281	26.55113477	27.46184497	0.332281052	5.68E-07	3.85E-06	LOC100168760	NC_042494.1	69062920	69073202	+	3246	protein_coding	zinc transporter ZIP1	-
103307767	33.399531	34.44713642	36.93831025	25.44840092	26.54786331	28.72028973	-0.369272807	1.90E-05	0.00010401	LOC103307767	NC_042494.1	32535919	32537142	-	1224	protein_coding	protein SREK1IP1	-
103308598	10.1564494	12.35920246	10.89568178	26.68838716	26.53600276	26.83230346	1.268261477	9.55E-37	4.85E-35	LOC103308598	NC_042494.1	13840042	13842087	+	1343	protein_coding	cysteine--tRNA ligase%2C cytoplasmic	tRNA-synt_1e
100164632	21.47348589	21.1672615	22.03564583	24.66893934	26.52890576	24.89448007	0.241482977	0.000234193	0.001049079	LOC100164632	NC_042493.1	29529277	29539459	-	3641	protein_coding	adapter molecule Crk	SH2
100166342	39.97566167	35.161214	38.57451971	21.02453326	26.50808247	22.60773906	-0.690613815	2.89E-15	4.61E-14	LOC100166342	NC_042493.1	58759547	58837519	-	4538	protein_coding	venom dipeptidyl peptidase 4%2C transcript variant X3	-
100165811	31.54968767	33.15313986	31.80812375	29.82452608	26.47368722	27.60939287	-0.194893719	0.007964973	0.024553221	LOC100165811	NC_042494.1	107994369	108002734	+	2219	protein_coding	peroxidase	An_peroxidase
100164172	31.86266684	30.30036843	28.69797838	25.46888055	26.39978758	25.76795028	-0.220736776	0.001508301	0.005651025	LOC100164172	NC_042495.1	81467280	81478393	+	2761	protein_coding	probable ATP-dependent RNA helicase DDX5%2C transcript variant X1	DEAD
100166348	52.98626001	49.69181895	51.33026449	22.48890051	26.39261265	26.27746247	-1.028668842	1.52E-34	6.76E-33	LOC100166348	NC_042495.1	57955975	57962769	-	1368	protein_coding	neuroglobin-like	-
100164518	33.88075433	33.74755311	30.53839119	27.9712686	26.33106562	27.86595154	-0.250643616	0.002498525	0.00883641	LOC100164518	NC_042495.1	42770498	42772585	-	1347	protein_coding	ras-related protein Ral-a%2C transcript variant X1	Ras
100160223	31.15881659	30.72162031	32.16282765	25.91455035	26.26431545	27.50364839	-0.23219223	0.001195301	0.004592857	LOC100160223	NC_042494.1	166550518	166558358	-	1910	protein_coding	regulation of nuclear pre-mRNA domain-containing protein 1B%2C transcript variant X2	-
100168511	34.02330941	35.88381861	34.8342839	29.10087416	26.21126464	29.17946594	-0.303045859	4.69E-05	0.000241455	LOC100168511	NC_042494.1	66726013	66731443	-	1956	protein_coding	targeting protein for Xklp2%2C transcript variant X2	-
100165137	36.70004814	37.24676434	35.87069001	24.38265575	26.20895442	27.05882338	-0.49356827	8.12E-12	9.50E-11	LOC100165137	NC_042494.1	69761721	69799056	-	1974	protein_coding	uncharacterized LOC100165137%2C transcript variant X2	-
100159344	21.37288385	23.43312642	21.47991713	26.0379438	26.18168589	25.84250928	0.242844942	0.000328035	0.00142888	LOC100159344	NC_042495.1	8611940	8616705	+	3248	protein_coding	uncharacterized LOC100159344	-
107883177	0.043101621	0.274372006	0.298046697	26.20066079	26.17526172	24.52025792	7.011619409	1.46E-63	1.81E-61	LOC107883177	NC_042493.1	131117826	131119249	+	912	protein_coding	uncharacterized LOC107883177	-
100575991	22.93665362	20.68724445	21.52428879	24.15371063	26.11839687	23.41747446	0.184235328	0.006903766	0.021688714	LOC100575991	NC_042494.1	86037555	86176827	+	7455	protein_coding	titin	BAH
100163925	30.53182036	33.9814811	34.99604392	29.48495223	26.11523146	28.84486958	-0.228998748	0.017133185	0.047306661	LOC100163925	NC_042494.1	122615104	122616192	+	945	protein_coding	uncharacterized LOC100163925	-
100165961	31.36156078	27.22815531	28.72602451	24.54306796	26.08211132	24.22777434	-0.215922058	0.006079636	0.019385289	LOC100165961	NC_042494.1	122610453	122613699	+	2394	protein_coding	methylcrotonoyl-CoA carboxylase subunit alpha%2C mitochondrial%2C transcript variant X1	CPSase_L_D2
100161301	31.70887792	34.05251444	31.76106444	25.48965807	26.05203743	26.20367287	-0.320161802	4.51E-06	2.70E-05	LOC100161301	NC_042494.1	87782349	87788661	-	2131	protein_coding	U3 small nucleolar ribonucleoprotein protein MPP10	-
100167047	30.44387882	37.29371174	34.40196078	27.84152717	26.05166934	27.10127361	-0.327041756	0.000156036	0.000723841	LOC100167047	NC_042495.1	77849218	77854761	-	1787	protein_coding	ribosomal oxygenase 1%2C transcript variant X1	Cupin_4
100169416	9.841010783	10.9988395	10.68770268	26.29291663	26.03934086	26.93039145	1.337668643	1.51E-68	2.09E-66	LOC100169416	NC_042494.1	106078582	106085220	+	2840	protein_coding	modular serine protease%2C transcript variant X1	Trypsin
100162675	21.48032075	20.36999728	20.90229176	25.07322685	26.00878871	26.6442864	0.315164958	8.42E-06	4.87E-05	LOC100162675	NC_042494.1	40144121	40160094	-	2551	protein_coding	MFS-type transporter SLC18B1	MFS_1
100575339	8.712598191	6.894079712	9.503911578	16.13159396	26.00864059	21.02378644	1.337794225	1.54E-16	2.70E-15	LOC100575339	NC_042496.1	8923940	8926947	+	1349	lncRNA	uncharacterized LOC100575339	-
100158900	21.33516695	20.18491225	20.44106203	26.41667583	26.00743461	24.64555625	0.321410762	1.24E-06	8.03E-06	LOC100158900	NC_042494.1	92779169	92786547	+	3812	protein_coding	transmembrane and coiled-coil domains protein 2	-
100166002	22.75364824	21.215834	20.44870558	26.64993099	26.00271153	27.92389272	0.328805186	1.10E-05	6.28E-05	LOC100166002	NC_042494.1	19932828	19939225	+	2581	protein_coding	signal recognition particle subunit SRP68%2C transcript variant X1	-
100169579	34.11941427	39.80513007	40.07006683	27.12268687	25.99062103	26.49358155	-0.510179209	1.74E-09	1.60E-08	Rbm34	NC_042493.1	89187156	89194054	+	1515	protein_coding	RNA binding motif protein 34	RRM_1
100167762	14.88386867	13.50888615	14.19470412	25.30803457	25.98082157	27.17298981	0.887581648	2.03E-19	4.30E-18	LOC100167762	NC_042495.1	84948373	84951291	-	1133	protein_coding	gamma-interferon-inducible lysosomal thiol reductase	-
100168541	21.17900606	22.11693782	21.74633898	23.45125435	25.96123916	24.61473373	0.193673159	0.010774894	0.031748789	LOC100168541	NC_042495.1	49843512	49847477	+	2127	protein_coding	protein DDI1 homolog 2%2C transcript variant X1	ubiquitin
100163370	22.30033147	24.15913601	22.54817625	27.90687446	25.93906462	26.77143341	0.23132487	0.000620615	0.002551848	LOC100163370	NC_042494.1	51461901	51475683	+	3506	protein_coding	major facilitator superfamily domain-containing protein 6	-
100575897	18.36627552	15.59499176	17.42964215	29.93784062	25.93789698	26.15160072	0.681052251	2.89E-11	3.20E-10	LOC100575897	NC_042495.1	42250245	42297505	+	1297	protein_coding	uncharacterized LOC100575897%2C transcript variant X2	-
100574433	12.69524737	9.020538619	9.866007997	20.67107371	25.86351839	18.75383268	1.05204983	2.97E-10	2.99E-09	LOC100574433	NW_021764180.1	432	8943	-	675	lncRNA	uncharacterized LOC100574433%2C transcript variant X2	-
100166814	14.9588411	16.38565295	15.89367659	25.26253931	25.83677813	26.31806709	0.720003482	1.20E-22	3.10E-21	LOC100166814	NC_042495.1	48899185	48911231	-	2591	protein_coding	sodium-coupled monocarboxylate transporter 1	-
100164304	31.28527749	31.47692618	31.98474623	27.36317079	25.81592679	26.94148656	-0.23494252	0.002941289	0.010201079	LOC100164304	NC_042495.1	75888469	75899122	+	1313	protein_coding	fixR-like	adh_short
100164889	22.59873296	19.96077805	19.69905302	23.83389768	25.80780817	24.34571588	0.254894067	0.001327515	0.005040723	LOC100164889	NC_042495.1	60471892	60486225	+	2877	protein_coding	FERM domain-containing protein 5%2C transcript variant X4	Band_41
100159263	29.46019203	28.33828355	29.13745887	20.64063212	25.79154674	23.71213757	-0.303065252	0.000135733	0.000639434	LOC100159263	NC_042495.1	30633974	30761501	+	5532	protein_coding	flocculation protein FLO11%2C transcript variant X3	-
103310092	17.84678083	18.08491619	17.00843898	21.23547652	25.7875869	24.26166278	0.435500131	3.16E-06	1.94E-05	LOC103310092	NC_042494.1	4848786	4854182	+	1718	protein_coding	limulus clotting factor C%2C transcript variant X1	Trypsin
100161739	34.69646048	42.14939347	42.46410381	31.86000352	25.76912599	29.93425349	-0.438223993	0.000120602	0.000573806	LOC100161739	NC_042494.1	141115125	141116844	+	750	protein_coding	mitochondrial import inner membrane translocase subunit Tim9	-
100167942	34.36790415	33.13285985	34.80996933	31.47097326	25.75457538	29.53281181	-0.231015254	0.011569668	0.033758953	LOC100167942	NC_042495.1	95833268	95837002	-	1265	protein_coding	uncharacterized LOC100167942%2C transcript variant X1	-
100159092	30.33268127	31.70713	31.39112299	27.43848728	25.75351779	26.70372071	-0.21866154	0.008745832	0.026560731	LOC100159092	NC_042495.1	5456660	5457934	-	1143	protein_coding	mpv17-like protein 2%2C transcript variant X1	Mpv17_PMP22
100165890	22.17318364	22.27623497	22.16419104	28.77906071	25.74819895	28.841071	0.330348624	0.000394039	0.001692096	Acp1	NC_042496.1	31556101	31557169	+	1069	protein_coding	acid phosphatase 1%2C soluble	LMWPc
103311905	15.64221327	15.73349759	16.27165533	24.91819212	25.73839358	22.62358675	0.628644547	3.33E-08	2.64E-07	LOC103311905	NC_042494.1	122811499	122821075	-	774	protein_coding	sphingomyelin synthase-related protein 1	SAM_1
115033156	23.79261989	22.76716915	21.65170891	29.81030172	25.73162764	25.62304714	0.257251696	0.003116526	0.010752118	LOC115033156	NC_042493.1	72313854	72338259	+	1971	protein_coding	contactin-like	fn3
100160083	29.78807592	31.06157402	30.54229654	26.23406841	25.65526617	27.29004904	-0.200063343	0.003326741	0.01139761	LOC100160083	NC_042493.1	91923935	91929033	-	2308	protein_coding	nucleolar protein 10	-
100160839	29.7052119	30.08503566	26.97270051	24.95333029	25.64392516	26.21840502	-0.169411657	0.015226747	0.042723172	LOC100160839	NC_042493.1	89891365	89897956	-	3119	protein_coding	serine/threonine-protein kinase 26%2C transcript variant X2	Pkinase
100159588	56.36375846	53.59361705	53.68206057	13.5942376	25.63007735	18.30909845	-1.50181512	1.17E-08	9.81E-08	LOC100159588	NC_042495.1	16217037	16245533	-	7191	protein_coding	uncharacterized LOC100159588	-
100163653	31.33970393	30.9939704	30.30150766	25.67002786	25.61381807	27.42711377	-0.228602992	0.001181222	0.004554286	LOC100163653	NC_042496.1	9197519	9228735	-	2126	protein_coding	sorting nexin-30-like%2C transcript variant X2	PX
100163183	26.95878175	27.19068204	27.23736431	22.91564211	25.61233767	22.98013387	-0.179777554	0.009260259	0.02788151	LOC100163183	NC_042493.1	25485128	25500737	-	3428	protein_coding	F-BAR domain only protein 2%2C transcript variant X4	-
100160761	30.27519779	35.40737023	32.41743333	28.23555297	25.60527433	24.86744431	-0.31028874	0.000135367	0.000637996	LOC100160761	NC_042495.1	50881208	50886365	-	2563	protein_coding	60 kDa SS-A/Ro ribonucleoprotein%2C transcript variant X2	-
100168454	6.120502027	6.574571621	6.55090592	15.11142667	25.57083121	21.43550883	1.697082049	2.50E-14	3.65E-13	LOC100168454	NC_042495.1	72176829	72188202	-	3603	protein_coding	uncharacterized LOC100168454	p450
100162326	30.66024847	26.26916502	29.53407727	24.55837569	25.55209852	25.86818416	-0.180059515	0.011479893	0.033539412	LOC100162326	NC_042494.1	118453736	118476702	+	6036	protein_coding	DNA-directed RNA polymerase II subunit RPB1	-
100167550	27.35086857	29.90819604	31.00799099	25.04955961	25.53128736	25.30513925	-0.210268187	0.009945786	0.029613527	LOC100167550	NC_042495.1	62113562	62118553	+	1499	protein_coding	uncharacterized LOC100167550	-
100159509	21.3463573	20.17521032	20.37762225	27.07368165	25.52137756	25.80489257	0.34744583	2.56E-07	1.81E-06	LOC100159509	NC_042496.1	12259495	12266975	-	3357	protein_coding	DNA repair endonuclease XPF	-
100168281	39.68755763	46.39421269	43.73841264	21.93459795	25.48594878	24.23252466	-0.850091345	1.16E-20	2.64E-19	LOC100168281	NC_042494.1	160353325	160361600	+	1245	protein_coding	peroxisomal membrane protein PMP22-like%2C transcript variant X1	Mpv17_PMP22
100160944	30.56816728	35.83984335	30.38356809	25.95053085	25.47573806	26.13578243	-0.31273737	0.001985091	0.00721631	LOC100160944	NC_042496.1	29960975	29961806	+	832	protein_coding	nuclear cap-binding protein subunit 2-like	RRM_1
100163992	11.77560792	14.55408766	13.17959181	23.58822395	25.44921795	22.39426855	0.862367789	1.55E-17	2.92E-16	LOC100163992	NC_042494.1	55797403	55799087	-	1619	protein_coding	uncharacterized LOC100163992	-
100159067	22.43395046	23.1300669	21.50402987	25.16270773	25.42991107	24.62568764	0.172077898	0.007082094	0.022156295	LOC100159067	NC_042496.1	27182881	27194354	-	3790	protein_coding	guanine nucleotide-binding protein G(s) subunit alpha%2C transcript variant X1	G-alpha
100162241	29.11558984	29.18089245	29.50223175	26.15273336	25.38581647	27.11668605	-0.151866777	0.013440236	0.038428163	LOC100162241	NC_042495.1	899423	906510	-	3733	protein_coding	zinc finger CCCH domain-containing protein 18%2C transcript variant X2	-
100166399	6.582750306	5.721920507	5.741484768	23.1260752	25.36030701	24.3569447	2.01831793	3.35E-134	2.20E-131	LOC100166399	NC_042495.1	76304834	76315186	+	4395	protein_coding	uncharacterized LOC100166399	fn3
100162404	16.83258591	18.27414973	16.4507668	27.52066026	25.35895557	26.37380776	0.627045095	1.18E-17	2.22E-16	LOC100162404	NC_042494.1	139742970	139754771	+	3211	protein_coding	nuclear cap-binding protein subunit 1	-
100159790	34.02121083	32.25143358	32.28184824	21.35040347	25.33581978	22.82352591	-0.497170276	3.23E-12	3.90E-11	LOC100159790	NC_042494.1	154978176	155031314	+	6847	protein_coding	ATP-binding cassette sub-family A member 3%2C transcript variant X2	ABC_tran
100575191	23.37328402	22.01467345	23.62969752	26.83464096	25.33476283	26.4344548	0.194457285	0.003145113	0.010838891	LOC100575191	NC_042495.1	81735802	81775163	-	3821	protein_coding	protein MTSS 2%2C transcript variant X3	-
100159106	23.87704691	21.80364121	21.70264543	24.78591515	25.33443547	24.64236003	0.156200538	0.01728265	0.047669296	LOC100159106	NC_042494.1	120316331	120632216	-	4822	protein_coding	solute carrier family 12 member 6%2C transcript variant X3	AA_permease
100168203	30.89948214	31.22608183	31.95943139	25.48400532	25.31540291	24.61328319	-0.312072115	4.96E-07	3.37E-06	LOC100168203	NC_042494.1	140304927	140308246	+	3188	protein_coding	DNA replication licensing factor Mcm5	MCM
100168746	26.67857066	28.59126022	29.36528127	24.06582786	25.27064652	24.68728626	-0.185821192	0.009742929	0.029084992	LOC100168746	NC_042495.1	84586902	84591680	-	2328	protein_coding	translation initiation factor eIF-2B subunit delta	-
100169095	40.87291509	45.66908906	46.03756232	26.82181973	25.26057561	24.89779204	-0.776578607	2.67E-21	6.32E-20	Hibadh	NC_042494.1	63716539	63794716	-	1357	protein_coding	3-hydroxyisobutyrate dehydrogenase	NAD_binding_2
100169161	87.96266013	62.52583342	76.20075316	22.00054637	25.24611073	24.83911161	-1.647239428	8.30E-41	5.06E-39	cp15	NC_042494.1	62647914	62649929	+	673	protein_coding	cuticular protein 15	Chitin_bind_4
100165035	29.21336512	27.66693934	27.21394178	25.6053436	25.24175931	24.75933504	-0.147007408	0.016334337	0.045402895	LOC100165035	NC_042495.1	101799380	101812063	-	4801	protein_coding	G protein-coupled receptor kinase 2	Pkinase
100165588	29.64225887	30.49389031	28.28355897	26.12759772	25.22191768	26.09409985	-0.184776007	0.012301852	0.035615957	LOC100165588	NC_042494.1	129388543	129394275	+	1834	protein_coding	endoplasmic reticulum junction formation protein lunapark	-
100163966	16.35406052	15.39691784	15.12084285	27.40421331	25.18663854	24.21115254	0.718932731	8.83E-24	2.42E-22	LOC100163966	NC_042493.1	77697111	77785491	+	5336	protein_coding	scavenger receptor class B member 1%2C transcript variant X1	-
100163765	21.1053309	18.15127344	19.42864402	25.55883252	25.18661717	23.2082133	0.339965559	2.69E-05	0.00014401	LOC100163765	NC_042495.1	28740527	29022115	+	2980	protein_coding	uncharacterized LOC100163765%2C transcript variant X1	-
100169259	15.38165692	16.06615939	15.94082718	27.26715598	25.16812603	25.24248185	0.72032331	8.88E-13	1.14E-11	LOC100169259	NC_042494.1	97953617	97956348	+	989	protein_coding	inositol monophosphatase 1-like	-
100167032	45.24020932	46.65902407	46.81383068	17.59078009	25.14245329	22.63287465	-1.078856666	2.02E-25	5.95E-24	LOC100167032	NC_042495.1	105284294	105291781	+	2399	protein_coding	uncharacterized LOC100167032%2C transcript variant X1	-
100162688	0.77937899	1.102509578	0.783073376	25.68422101	25.13611623	24.48669611	4.826678951	6.43E-209	1.13E-205	LOC100162688	NW_021773491.1	35394	39097	-	1967	protein_coding	UDP-glucuronosyltransferase 2B2	UDPGT
115034066	23.09350349	26.81634481	23.81357503	33.88383819	25.13371852	30.77912444	0.291758404	0.008457203	0.025783439	LOC115034066	NC_042495.1	28770869	28773304	+	1423	protein_coding	myrosinase 1-like	Glyco_hydro_1
100165112	18.37423151	17.30788305	17.57788987	27.28281675	25.08446243	25.95998224	0.562919804	5.27E-14	7.51E-13	LOC100165112	NC_042495.1	28874768	28903218	+	2518	protein_coding	neural cell adhesion molecule L1%2C transcript variant X2	-
100163918	18.33312534	17.58154085	16.28928483	20.83452828	25.07866942	22.70878418	0.400364846	1.85E-05	0.00010186	LOC100163918	NC_042494.1	16672378	16674828	-	1919	protein_coding	protein spartin	-
100164099	21.38735251	20.98140777	20.89473465	23.76967392	25.06506611	24.85677667	0.226684525	0.000481455	0.002035349	LOC100164099	NC_042494.1	106985294	107036519	-	3391	protein_coding	synaptotagmin 1%2C transcript variant X3	C2
100160764	32.64678203	34.15554128	34.53004537	26.80577682	25.06382126	27.27851819	-0.349338091	3.51E-05	0.000184635	LOC100160764	NC_042494.1	86023494	86026525	-	1127	protein_coding	SAGA-associated factor 29	-
100167081	20.98253697	21.40643311	21.60238839	25.04452359	25.06021539	24.78322718	0.233991722	0.005335691	0.017317671	LOC100167081	NC_042494.1	51335170	51336909	-	1317	protein_coding	programmed cell death protein 2%2C transcript variant X2	-
100166575	21.9523554	24.19563143	22.97562145	25.72388225	25.04169445	27.67867369	0.189490241	0.016141511	0.044922317	LOC100166575	NC_042494.1	43631760	43635513	-	2027	protein_coding	golgin-84%2C transcript variant X3	-
100166197	15.5011903	15.01860102	18.26955289	27.23999822	25.03084255	28.61733117	0.737926393	3.47E-09	3.11E-08	LOC100166197	NC_042496.1	12313674	12315520	-	672	protein_coding	6-pyruvoyl tetrahydrobiopterin synthase	-
100573623	29.19013749	32.54303443	35.53423585	28.52310673	25.01653103	25.38258697	-0.292973767	0.007725522	0.023929563	LOC100573623	NC_042496.1	36422169	36424633	-	742	protein_coding	cytochrome c oxidase copper chaperone	-
100161480	27.54476762	32.83852402	30.02983637	25.28643804	24.97824512	24.38787628	-0.268863519	0.000804028	0.00320494	LOC100161480	NC_042494.1	71626571	71630280	+	2192	protein_coding	probable cytochrome P450 6a13	p450
100570516	32.95909763	37.53798447	37.6891319	21.83283554	24.94656362	23.92756886	-0.605951378	1.67E-10	1.71E-09	LOC100570516	NC_042494.1	18661169	18666792	-	1071	protein_coding	homeodomain-only protein	-
107883838	20.18288011	18.62229213	17.93424703	27.21891214	24.94403367	22.75712515	0.407176206	2.04E-05	0.000111329	LOC107883838	NC_042493.1	5685771	5772722	-	1599	protein_coding	uncharacterized LOC107883838	-
100159299	21.29459905	22.47038441	21.15913359	24.33356915	24.93866633	25.54098825	0.211163113	0.012269656	0.035545054	LOC100159299	NC_042494.1	12412336	12417291	+	1366	protein_coding	KIAA0174-like	-
100166724	6.349656534	6.422671199	7.100896256	26.92773104	24.85795825	26.92939221	1.994415789	2.00E-81	3.66E-79	LOC100166724	NC_042495.1	71173107	71177278	-	1461	protein_coding	trypsin-1	Trypsin
100168230	30.65313671	28.8935566	30.66535911	26.77831086	24.84261415	25.07701019	-0.227276569	0.001258506	0.004801801	LOC100168230	NC_042494.1	68215060	68265485	+	2575	protein_coding	(11Z)-hexadec-11-enoyl-CoA conjugase%2C transcript variant X4	-
100167515	12.92448743	12.26109416	12.70223019	27.86545315	24.80478121	24.64500776	1.035816537	4.32E-32	1.73E-30	LOC100167515	NC_042494.1	25112969	25120501	+	1983	protein_coding	proclotting enzyme	-
100169237	18.99959157	17.65686066	17.50658782	29.46299105	24.77586177	24.84550271	0.552473792	8.12E-09	6.94E-08	LOC100169237	NC_042493.1	11363504	11370983	+	1651	protein_coding	phenoloxidase-activating factor 2	Trypsin
100168685	30.88539048	32.76785677	33.16165375	26.52369474	24.77382664	25.20425497	-0.332323094	1.20E-05	6.79E-05	LOC100168685	NC_042496.1	36917516	36921255	+	1694	protein_coding	short-chain specific acyl-CoA dehydrogenase%2C mitochondrial	-
100162744	18.76712811	18.16129946	19.0547284	21.5274377	24.76860662	24.87631857	0.352998036	4.68E-05	0.000241455	LOC100162744	NC_042495.1	53220418	53252225	+	1883	protein_coding	SH2 domain-containing protein 4A	SH2
100162974	25.32639708	31.49441565	27.35106789	21.57761868	24.7521835	24.37686114	-0.244320118	0.005792918	0.018633	LOC100162974	NC_042494.1	107582877	107592193	-	3427	protein_coding	putative fatty acyl-CoA reductase CG5065	NAD_binding_4
100168259	28.90623695	29.25572822	30.35548653	25.3499406	24.74204348	23.98489092	-0.249652772	0.000459674	0.001947441	LOC100168259	NC_042495.1	104010453	104016134	+	2067	protein_coding	protein TFG	-
100164156	18.86449211	18.96192629	18.10006951	23.70757521	24.71184286	23.86748725	0.376637389	4.87E-07	3.32E-06	LOC100164156	NC_042493.1	65414468	65429746	+	2140	protein_coding	beclin 1-associated autophagy-related key regulator%2C transcript variant X1	-
100165967	19.57801187	21.58108978	20.716271	24.69039801	24.66116079	24.23768403	0.257588629	0.006624134	0.020900488	LOC100165967	NC_042493.1	47005809	47008255	-	1030	protein_coding	RNA transcription%2C translation and transport factor protein	-
100161662	20.21288095	16.58119041	17.56254146	24.88109476	24.55214726	23.79200583	0.43586076	1.36E-07	1.00E-06	LOC100161662	NC_042495.1	39102906	39114605	-	3730	protein_coding	uncharacterized LOC100161662%2C transcript variant X3	fn3
100162398	27.99101292	27.28485013	26.49474237	24.50488243	24.54687783	23.48239617	-0.166341682	0.008004222	0.024650129	LOC100162398	NC_042494.1	118783535	118792327	-	3890	protein_coding	ubiquitin conjugation factor E4 B%2C transcript variant X3	U-box
100165675	19.7748312	19.11520976	19.70268162	23.55832327	24.4780299	22.90469619	0.282741956	5.80E-05	0.000293842	Rspry1	NC_042495.1	71902593	71910163	-	2773	protein_coding	RING finger and SPRY domain-containing protein 1	SPRY
100166589	27.79840268	28.55666875	27.79820616	24.00167676	24.45043544	24.67336424	-0.195876	0.002155702	0.007757872	LOC100166589	NC_042494.1	22363546	22370412	+	2896	protein_coding	gastrula zinc finger protein XlCGF71.1	zf-C2H2
100159394	15.6911187	16.72377044	18.31181462	21.16898382	24.43325984	23.75792027	0.459139066	3.32E-07	2.31E-06	LOC100159394	NC_042496.1	17065656	17076340	-	2187	protein_coding	maltase-like%2C transcript variant X2	-
100166566	26.84530321	27.54795632	26.99898388	24.28646729	24.42598271	23.80992784	-0.159549436	0.014276919	0.040460224	LOC100166566	NC_042494.1	117754888	117773259	+	2725	protein_coding	transmembrane protein 184B%2C transcript variant X1	-
100569626	4.419318918	4.661257493	6.046370074	26.53878146	24.40797637	26.01208366	2.358837684	7.03E-86	1.52E-83	LOC100569626	NC_042494.1	16946599	16950126	+	1521	protein_coding	transmembrane protein 120 homolog	-
100159941	29.59810558	29.00190334	29.13774601	25.30558698	24.40128028	25.32253242	-0.219032596	0.000101195	0.000488391	LOC100159941	NC_042494.1	91007402	91019904	+	5647	protein_coding	nuclear pore complex protein nup98%2C transcript variant X1	-
100162821	22.76834029	22.22634292	22.29125786	26.35452308	24.39266598	24.59119961	0.169853003	0.006940859	0.021776283	LOC100162821	NC_042494.1	159973750	159997454	-	4841	protein_coding	kinesin-like protein KIF2A%2C transcript variant X2	Kinesin
100164297	30.42089639	31.77489142	31.89593774	28.05510514	24.39219554	26.65116591	-0.243300106	0.000861936	0.003421073	LOC100164297	NC_042494.1	97044253	97052328	-	2835	protein_coding	ribonuclease Z%2C mitochondrial%2C transcript variant X2	-
100163376	34.67785181	29.36525236	31.48098011	23.6744733	24.35139514	23.51439314	-0.410966962	9.27E-07	6.09E-06	LOC100163376	NC_042494.1	129266965	129275738	-	1842	protein_coding	venom carboxylesterase-6%2C transcript variant X1	COesterase
100159777	21.87112546	20.53745133	20.88126806	24.72641655	24.31275013	24.56071827	0.22410756	0.002111199	0.00761857	LOC100159777	NC_042495.1	62322483	62342163	+	2252	protein_coding	calcium uptake protein 3%2C mitochondrial%2C transcript variant X1	-
100160756	20.70267753	21.23433775	20.78851441	23.71501178	24.23897748	23.30187763	0.190848894	0.001248694	0.00476667	LOC100160756	NC_042494.1	69293558	69304959	-	4912	protein_coding	thrombospondin type-1 domain-containing protein 7A	TSP_1
100163733	20.37546984	20.65725124	20.79379604	24.68086089	24.23304242	23.41819806	0.233489477	0.000625985	0.002573259	LOC100163733	NC_042495.1	16417224	16423838	-	2780	protein_coding	oligoribonuclease%2C mitochondrial%2C transcript variant X3	Exonuc_X-T
100168460	19.10674109	18.05731428	19.4277969	21.43121606	24.22892344	24.59455114	0.318663382	7.41E-05	0.000367954	LOC100168460	NC_042495.1	78957464	78961985	+	2656	protein_coding	protein croquemort%2C transcript variant X2	-
100159151	28.08304549	31.70591553	30.50801965	27.046752	24.21964259	25.76657856	-0.221791282	0.005106264	0.016662156	LOC100159151	NC_042496.1	25064791	25069067	-	2073	protein_coding	WD repeat-containing protein 46	-
100164445	40.87061305	34.74960281	38.51172444	22.96608364	24.21753311	21.1906936	-0.732599234	1.79E-16	3.11E-15	LOC100164445	NC_042494.1	157887843	157904492	-	1661	protein_coding	arrestin domain-containing protein 1%2C transcript variant X1	-
100164157	19.17336557	20.04044876	19.45160824	23.7791918	24.21495875	25.38999267	0.329738283	2.86E-05	0.000152694	LOC100164157	NC_042495.1	75658745	75661884	+	1798	protein_coding	RCC1-like G exchanging factor-like protein%2C transcript variant X1	-
100160985	17.77231343	12.61573831	14.83812022	21.19553222	24.1963986	25.12540597	0.646035477	5.79E-08	4.48E-07	LOC100160985	NC_042495.1	95162408	95170560	+	1838	protein_coding	serine protease inhibitor 4-like%2C transcript variant X1	Serpin
100166951	10.79175536	13.01920482	11.90251134	26.86140913	24.1693315	24.02309616	1.079483634	4.14E-25	1.21E-23	LOC100166951	NC_042495.1	73503884	73516596	+	1355	protein_coding	nose resistant to fluoxetine protein 6	-
100159297	14.83680959	14.23598754	15.19186593	19.24946507	24.14458305	24.73996607	0.628821131	3.50E-06	2.14E-05	LOC100159297	NC_042494.1	16167884	16168863	-	665	protein_coding	cAMP-responsive element-binding protein-like	bZIP_2
100159207	37.07458842	30.60333517	34.25435679	21.33482378	24.126087	22.65663064	-0.575283319	2.01E-11	2.26E-10	LOC100159207	NC_042495.1	63738003	63743857	-	2780	protein_coding	probable peroxisomal acyl-coenzyme A oxidase 1	-
100166151	61.74409684	58.3731514	60.838664	9.045334476	24.07529568	17.6057177	-1.828851092	8.18E-07	5.42E-06	LOC100166151	NC_042495.1	65708904	65725737	-	3788	protein_coding	ABC transporter G family member 23%2C transcript variant X5	ABC_tran
100166269	21.1233324	21.94463378	20.06668753	22.68738185	24.05872431	23.76091822	0.165907751	0.00794935	0.02450985	LOC100166269	NC_042494.1	85386909	85434922	+	5994	protein_coding	regulator of G-protein signaling 11%2C transcript variant X1	RGS
100160194	29.98119569	34.02551089	31.86573839	25.73985674	24.05260959	25.92756661	-0.333225085	0.00010421	0.000502328	LOC100160194	NC_042494.1	1584826	1586202	-	1298	protein_coding	pre-mRNA-splicing factor 38-like	PRP38
100167002	28.57907743	30.26814981	28.00242153	24.21279558	24.03598821	24.51189616	-0.248648029	0.000132157	0.000624453	LOC100167002	NC_042494.1	77459574	77464583	-	3158	protein_coding	periodic tryptophan protein 2 homolog	WD40
100169316	20.9083327	19.42329829	20.0190059	24.14432904	24.01683394	22.68382948	0.237898358	0.00028324	0.00124684	LOC100169316	NC_042494.1	127761628	127778973	+	4655	protein_coding	egalitarian protein homolog	3_5_exonuc
100574210	29.05424085	30.34612912	29.84281185	24.53767264	24.00850247	25.83487825	-0.255963217	0.002186278	0.007851788	ACYPI38901	NC_042494.1	160504613	160507416	-	1219	protein_coding	single-stranded DNA-binding protein%2C mitochondrial-like	-
100164416	4.715824468	1.807627337	2.559695163	31.60592316	23.98348766	27.08920941	3.190615356	1.66E-14	2.46E-13	LOC100164416	NC_042496.1	30005517	30023656	-	2584	protein_coding	nose resistant to fluoxetine protein 6	-
103309165	19.69087163	17.67404509	17.05181661	21.61241443	23.96216064	21.19289004	0.300622404	0.004448543	0.0147076	LOC103309165	NC_042494.1	134969870	134970945	+	1076	protein_coding	uncharacterized LOC103309165	-
100165979	30.01202468	31.07547623	29.53103153	24.58636689	23.96034847	24.10278368	-0.312091825	1.77E-06	1.13E-05	LOC100165979	NC_042494.1	90681447	90686697	+	2723	protein_coding	nuclear pore complex protein Nup107	-
103311532	13.38951871	12.12038339	13.02464066	25.26843192	23.95944664	24.39693118	0.940492898	8.91E-14	1.24E-12	LOC103311532	NW_021774054.1	4	928	-	640	protein_coding	uncharacterized LOC103311532	-
100569280	30.59761424	29.29715404	28.80072293	24.06520843	23.9563212	23.76426118	-0.298693693	1.85E-06	1.17E-05	LOC100569280	NC_042495.1	489230	548423	-	3610	protein_coding	uncharacterized LOC100569280%2C transcript variant X1	-
100167197	32.38587864	30.80954882	30.32209024	21.91047579	23.95249178	22.69490016	-0.441439696	5.95E-12	7.05E-11	LOC100167197	NC_042495.1	89902082	89922579	-	4781	protein_coding	calcium-activated chloride channel regulator 1	VWA
100160996	29.67541536	32.15891117	29.82066589	27.53152082	23.93707896	27.65853671	-0.205178729	0.009421697	0.028297375	LOC100160996	NC_042494.1	132039996	132045120	+	2534	protein_coding	cyclin-A2	Cyclin_C
100159701	26.9612883	25.33856176	26.80368316	22.39972893	23.92506236	22.22453507	-0.199808217	0.006596498	0.020827086	LOC100159701	NC_042494.1	37443350	37452488	+	2324	protein_coding	mitoferrin-1%2C transcript variant X2	Mito_carr
103310098	26.41469482	25.47252982	26.30022755	21.04969249	23.90241386	22.28641186	-0.210957016	0.00199159	0.007236599	LOC103310098	NC_042496.1	1793062	1824771	-	4265	protein_coding	baculoviral IAP repeat-containing protein 7%2C transcript variant X2	BIR
100162734	20.11267104	19.650907	19.88613353	23.55903038	23.8894353	24.62514486	0.279506938	0.000791544	0.003164774	LOC100162734	NC_042494.1	150643006	150644605	-	1458	protein_coding	BAG family molecular chaperone regulator 2-like%2C transcript variant X3	-
100164472	22.10530047	20.17077591	20.62089158	23.41104454	23.87902023	22.97581596	0.1662493	0.00946636	0.02840719	LOC100164472	NC_042496.1	38094672	38131247	-	5477	protein_coding	flocculation protein FLO11	Y_phosphatase
100165178	21.75984685	23.7777594	20.65138979	28.74606916	23.87522768	26.88755125	0.271219279	0.002569381	0.009054527	LOC100165178	NC_042496.1	41515051	41523373	-	2231	protein_coding	facilitated trehalose transporter Tret1%2C transcript variant X1	Sugar_tr
100162450	14.95839474	18.02747386	17.31272608	23.88010344	23.86818568	23.90044612	0.518250013	1.39E-10	1.43E-09	LOC100162450	NC_042494.1	53845722	53869426	+	3093	protein_coding	dentin sialophosphoprotein%2C transcript variant X1	-
100162171	27.37875226	31.05076384	28.52050926	22.76335638	23.86602676	23.8514065	-0.295865632	0.000521363	0.002187643	LOC100162171	NC_042496.1	36794002	36805015	-	1374	protein_coding	uncharacterized LOC100162171	-
100159670	28.06517643	31.65599978	28.82924415	25.57655889	23.85972046	24.90620022	-0.245239297	0.004131664	0.013769593	LOC100159670	NC_042494.1	118810182	118815847	-	1353	protein_coding	mRNA cap guanine-N7 methyltransferase-like%2C transcript variant X1	-
100160092	35.15635357	37.33992613	36.42326537	22.09439693	23.78090291	21.60505581	-0.683665398	8.63E-28	2.84E-26	LOC100160092	NC_042494.1	67182523	67217935	+	5112	protein_coding	sushi%2C von Willebrand factor type A%2C EGF and pentraxin domain-containing protein 1	Lectin_C
100165269	23.42658974	22.07126204	21.46799675	26.29050711	23.75436336	27.79248292	0.223033649	0.009182623	0.027690031	LOC100165269	NC_042494.1	129822826	129842071	+	1933	protein_coding	alanine--glyoxylate aminotransferase 2-like%2C transcript variant X1	Aminotran_3
100164193	28.62302048	29.96040796	30.10118481	23.06704483	23.72664125	23.25500504	-0.333116693	3.61E-06	2.20E-05	LOC100164193	NC_042495.1	63292135	63306908	-	1946	protein_coding	facilitated trehalose transporter Tret1	Sugar_tr
100573440	19.86596082	19.22450425	20.53272979	22.8279743	23.72514299	21.23746821	0.192374582	0.009554873	0.028642832	LOC100573440	NC_042496.1	12829571	12844028	+	2972	lncRNA	uncharacterized LOC100573440	-
100169321	35.17953001	30.94767847	33.59449697	21.58999848	23.72327005	23.5790196	-0.527272017	1.03E-10	1.08E-09	LOC100169321	NC_042494.1	18679290	18682771	-	1923	protein_coding	zinc transporter ZIP9-B%2C transcript variant X2	-
100160576	11.012319	9.621722738	9.976862019	26.9761667	23.67234194	24.97769987	1.310457587	1.09E-35	5.20E-34	LOC100160576	NC_042496.1	37608655	37615666	+	1335	protein_coding	uncharacterized protein LOC100160576%2C transcript variant X1	-
100166680	19.59187857	19.68154109	19.46017608	21.28962288	23.66809509	22.59104898	0.208426343	0.009574699	0.028696814	LOC100166680	NC_042496.1	39651347	39669981	-	1888	protein_coding	ion transport peptide-like%2C transcript variant X2	-
100159821	19.46884502	19.04684389	19.51918459	26.54377748	23.6348971	24.23466166	0.365579539	2.07E-06	1.30E-05	LOC100159821	NC_042495.1	40658064	40679342	+	2437	protein_coding	long-chain-fatty-acid--CoA ligase 5	AMP-binding
100168345	30.88900524	29.69116624	29.31505582	24.71323811	23.6239242	24.4812652	-0.29735816	2.88E-07	2.02E-06	LOC100168345	NC_042494.1	142666061	142674307	-	6214	protein_coding	zinc finger protein Xfin%2C transcript variant X1	-
100161233	16.13154215	12.65004041	13.99876749	21.81354516	23.60958398	22.01198856	0.662370886	4.21E-13	5.57E-12	LOC100161233	NC_042494.1	102977236	103082780	-	3699	protein_coding	gonadotropin-releasing hormone receptor%2C transcript variant X1	7tm_1
100163293	32.00388325	34.93933132	34.14011693	25.93473445	23.59325512	24.86138395	-0.435000553	1.78E-06	1.13E-05	LOC100163293	NC_042495.1	53327855	53328897	-	974	protein_coding	uncharacterized LOC100163293	-
100167191	19.06881661	18.20981022	18.87461217	22.42575519	23.58970655	24.18162791	0.328582556	1.47E-05	8.20E-05	LOC100167191	NC_042493.1	70816437	70820692	+	2249	protein_coding	ubiquitin-conjugating enzyme E2-17 kDa	UQ_con
100159261	28.29395139	29.90843094	29.64424351	26.36736533	23.58066677	24.1601737	-0.238073409	0.002165783	0.007783498	LOC100159261	NC_042494.1	83278078	83282299	-	1895	protein_coding	protein arginine N-methyltransferase 3%2C transcript variant X1	-
100164801	28.18026419	26.24069756	27.36860302	21.02369958	23.57974715	22.2295354	-0.284803109	2.18E-05	0.000118196	LOC100164801	NC_042495.1	98341016	98451251	+	5143	protein_coding	cordon-bleu protein-like 1%2C transcript variant X4	-
100169018	83.08271525	56.46742752	70.1119373	17.25880753	23.57779255	20.67457461	-1.763315893	8.28E-18	1.58E-16	LOC100169018	NC_042495.1	49118154	49140092	-	3486	protein_coding	DEP domain-containing protein DDB_G0279099	CBM_14
100301492	20.97977654	20.8120947	20.07651739	25.07561177	23.57081968	27.36531344	0.302874991	0.016639672	0.046105392	Obp9	NC_042496.1	2339614	2345471	-	519	protein_coding	odorant-binding protein 9	-
100162053	38.86645616	26.77431788	33.35440586	21.87886179	23.54264518	21.53546061	-0.55814863	2.85E-07	2.00E-06	LOC100162053	NC_042494.1	26039470	26071726	+	4000	protein_coding	BTB/POZ domain-containing protein 6%2C transcript variant X1	BTB
100165456	20.29456832	21.29780266	19.390678	22.07463028	23.5220578	22.88025493	0.173693084	0.016038552	0.044691176	LOC100165456	NC_042494.1	7224255	7263728	+	2855	protein_coding	RNA-binding protein 24	RRM_1
100164880	14.36750241	17.89086719	15.86024053	16.47283275	23.49071854	21.86758159	0.368821644	0.002153705	0.007752454	LOC100164880	NC_042495.1	111964169	111981882	-	2725	protein_coding	uncharacterized WD repeat-containing protein C1306.02	-
100169354	30.7476781	32.25080823	30.09461195	25.81866095	23.46736664	24.30112919	-0.332362549	5.17E-07	3.51E-06	LOC100169354	NC_042495.1	5619816	5627813	+	3935	protein_coding	tRNA pseudouridine synthase A%2C transcript variant X3	-
100167421	27.60609503	27.98632547	29.74096506	24.48840981	23.43433875	23.87495353	-0.241726576	0.002791156	0.009736031	LOC100167421	NC_042494.1	116267384	116269048	+	1441	protein_coding	general transcription factor IIF subunit 2%2C transcript variant X1	-
100570133	6.157057812	4.363012012	5.467615269	22.13285343	23.4229424	21.08701987	2.065034512	2.24E-80	4.02E-78	LOC100570133	NC_042495.1	28613195	28637442	-	3422	protein_coding	uncharacterized LOC100570133	fn3
100572102	24.69747857	27.91924844	27.82280292	22.85775976	23.40992294	23.31596192	-0.201438653	0.016018454	0.044658622	LOC100572102	NC_042493.1	91554189	91558287	+	1555	protein_coding	probable small nuclear ribonucleoprotein Sm D1	LSM
100160543	28.19483982	28.26729311	26.35660309	23.96625366	23.40645011	23.15013211	-0.225414734	0.001097306	0.004256748	LOC100160543	NC_042494.1	110782164	110792941	-	2635	protein_coding	cyclin-dependent kinase 11B%2C transcript variant X1	Pkinase
100167965	21.66779844	19.51443559	20.04098237	25.85659096	23.31410947	22.66176381	0.237216064	0.000682426	0.002777054	LOC100167965	NC_042493.1	87509991	87567279	+	15306	protein_coding	ryanodine receptor	SPRY
100159234	19.50599641	17.83377861	18.96942831	21.97172007	23.29823976	21.07239826	0.243198173	0.000197369	0.000897634	LOC100159234	NC_042495.1	33550050	33629742	+	8877	protein_coding	RNA-binding protein fusilli%2C transcript variant X3	-
100161884	66.17657893	43.97833002	51.80939393	19.34886944	23.27174401	24.57582441	-1.264133007	2.84E-19	5.91E-18	cp58	NC_042494.1	116659882	116663759	+	752	protein_coding	cuticular protein 58	Chitin_bind_4
100168964	34.68685616	29.63433456	31.03342376	22.63521611	23.26774587	22.23584193	-0.478649667	1.49E-09	1.38E-08	LOC100168964	NC_042493.1	56369193	56385605	+	2543	protein_coding	aromatic-L-amino-acid decarboxylase	-
100169480	7.764487726	8.55268989	8.276073752	29.55206451	23.25150362	26.2404846	1.691765488	1.12E-83	2.30E-81	LOC100169480	NC_042494.1	121189209	121206382	-	7680	protein_coding	probable chitinase 10%2C transcript variant X1	CBM_14
100162551	69.05245145	51.78696245	70.90610463	15.94250568	23.20541647	22.08834433	-1.640676865	1.86E-29	6.66E-28	cp53	NC_042495.1	61416291	61417357	+	637	protein_coding	cuticular protein 53	-
100569019	27.55359139	28.08312414	28.89693893	22.03618066	23.17518672	20.90777142	-0.347108783	6.81E-06	3.98E-05	LOC100569019	NC_042494.1	125861138	125870416	+	1886	protein_coding	caspase-3%2C transcript variant X2	Peptidase_C14
100159637	9.224334557	9.847470457	10.54278521	22.91364229	23.14084444	23.36363265	1.237407082	1.13E-45	8.10E-44	LOC100159637	NC_042495.1	118326174	118339317	-	2054	protein_coding	fatty acyl-CoA reductase wat	NAD_binding_4
100162169	31.54751029	32.19460981	28.77427022	21.83319008	23.1046143	21.93106613	-0.462082267	5.95E-09	5.18E-08	LOC100162169	NC_042493.1	3966689	3985277	-	1798	protein_coding	legumain	-
100166086	29.27591977	33.56139813	33.92993528	25.58988627	23.10441661	24.29908124	-0.398641289	0.000193814	0.000883504	LOC100166086	NC_042495.1	60257134	60261290	+	717	protein_coding	translation machinery-associated protein 16	-
100169304	25.63139272	24.89115726	24.28850978	21.6009221	23.10034181	21.18807806	-0.176603168	0.005188254	0.016891268	LOC100169304	NC_042494.1	27375807	27390400	+	5452	protein_coding	bromodomain adjacent to zinc finger domain protein 1A%2C transcript variant X1	Bromodomain
100161055	75.81984213	47.06559152	61.65336444	18.15968983	23.0641291	19.96103405	-1.586941228	7.35E-13	9.44E-12	LOC100161055	NC_042493.1	9693777	9734084	+	4932	protein_coding	uncharacterized protein LOC100161055%2C transcript variant X1	-
100575092	29.42266377	26.52664338	27.30845425	22.3710461	23.06113795	22.27382014	-0.292095615	0.000449067	0.001906086	LOC100575092	NC_042493.1	28357077	28361380	-	1503	protein_coding	protein FAM122A%2C transcript variant X2	-
100160712	29.53195187	33.43369495	29.44807067	19.17446132	23.05191976	21.71411841	-0.524586939	3.27E-09	2.94E-08	LOC100160712	NC_042494.1	109382489	109390729	+	2143	protein_coding	spaetzle 6	-
100159429	7.792629592	5.132273406	6.287730457	20.64883246	23.01183285	22.15065133	1.781339803	6.72E-52	6.02E-50	LOC100159429	NC_042493.1	86379558	86391854	-	4323	protein_coding	uncharacterized LOC100159429%2C transcript variant X4	-
100167085	14.01267487	14.25201867	14.21652686	23.05617496	23.00128297	23.08027344	0.709588478	1.43E-22	3.67E-21	LOC100167085	NC_042494.1	124365640	124383690	+	2578	protein_coding	sodium/hydrogen exchanger 9B2-like	Na_H_Exchanger
100161069	27.0601064	28.96236786	28.33590281	22.25679873	22.99338821	23.0736451	-0.296998388	0.000336377	0.001461585	LOC100161069	NC_042493.1	62355401	62360172	+	1319	protein_coding	high mobility group protein 20A-like	HMG_box
100164528	18.34315814	19.0353284	17.54762609	21.45101071	22.98766653	24.05041825	0.324715876	1.72E-05	9.52E-05	LOC100164528	NC_042495.1	100688354	100692270	-	2938	protein_coding	glutamine-dependent NAD(+) synthetase%2C transcript variant X2	CN_hydrolase
100168481	47.74614773	41.05159504	45.09717477	19.30909304	22.97596897	21.34087549	-1.067099913	5.30E-34	2.30E-32	LOC100168481	NC_042495.1	7617512	7619704	+	1980	protein_coding	uncharacterized LOC100168481	-
100163597	86.38321852	77.50942263	80.91943592	31.95019952	22.89591333	26.75134542	-1.578345128	1.28E-51	1.13E-49	LOC100163597	NC_042496.1	993854	999083	+	1230	protein_coding	omega-amidase NIT2-like	CN_hydrolase
100162150	27.79118928	28.77597113	28.24949998	25.25759684	22.87588127	24.24252678	-0.221875743	0.001711568	0.006327721	LOC100162150	NC_042494.1	126325798	126336262	+	2529	protein_coding	cleavage and polyadenylation specificity factor 73%2C transcript variant X2	-
100163173	18.04039981	18.67973777	17.05666784	22.87901908	22.85821869	21.54550683	0.329802224	5.29E-06	3.14E-05	LOC100163173	NC_042495.1	5364483	5369520	-	3081	protein_coding	MAP kinase phosphatase with leucine-rich repeats protein 3	-
100164229	12.39556099	13.94727377	14.61390256	22.41631255	22.79026581	21.31327552	0.708338494	1.91E-13	2.59E-12	LOC100164229	NC_042494.1	129188973	129192099	-	1519	protein_coding	uncharacterized LOC100164229	-
115034333	18.55369639	14.84681801	17.03396483	20.93657374	22.76744758	22.8770621	0.406338515	0.001049381	0.004088932	LOC115034333	NC_042495.1	14013612	14033974	-	750	lncRNA	uncharacterized LOC115034333	-
100159980	3.566617574	2.721261816	3.218444024	22.63633041	22.76351152	21.40658683	2.818170391	2.94E-154	2.58E-151	LOC100159980	NC_042494.1	2081429	2095410	+	2590	protein_coding	uncharacterized LOC100159980	fn3
100159275	28.06639666	28.42859816	27.87650627	22.01753814	22.75328872	22.08312807	-0.328950429	2.80E-07	1.97E-06	LOC100159275	NC_042495.1	12572709	12588889	-	3000	protein_coding	probable ribonuclease ZC3H12C%2C transcript variant X1	-
100168516	15.90672876	16.77903139	16.22040989	23.41360148	22.7531897	21.61162049	0.477979233	1.43E-09	1.33E-08	Syt4	NC_042494.1	73577685	73588431	-	2145	protein_coding	synaptotagmin 4%2C transcript variant X1	C2
100165800	20.08579231	20.42269174	19.85931143	23.84946529	22.73737972	22.74639323	0.20656922	0.002411859	0.008560607	LOC100165800	NC_042494.1	161574107	161590945	-	2961	protein_coding	hippocampus abundant transcript 1 protein	MFS_1
100166526	60.89545924	50.71981319	52.72169364	12.67371855	22.71529408	16.93883083	-1.645000008	8.41E-11	8.87E-10	LOC100166526	NC_042495.1	96892536	96909979	-	2919	protein_coding	chorion peroxidase	An_peroxidase
100161460	15.8991276	17.51328071	15.96184774	25.59445488	22.69230138	24.39744446	0.564843517	1.49E-13	2.04E-12	LOC100161460	NC_042494.1	1688060	1709269	+	3491	protein_coding	nocturnin%2C transcript variant X1	Exo_endo_phos
100163924	25.55811435	26.79873803	26.35503417	22.18659431	22.69186187	21.42481465	-0.240241767	0.008241412	0.025272062	LOC100163924	NC_042494.1	147974269	147977694	+	1052	protein_coding	uncharacterized protein LOC100163924	-
100167539	26.49191831	24.11044007	24.84335925	21.14203923	22.67763264	21.07392667	-0.21089438	0.001580422	0.005894637	LOC100167539	NC_042494.1	75747746	75763018	+	5312	protein_coding	ets DNA-binding protein pokkuri%2C transcript variant X1	Ets
100163234	26.33565427	25.8564661	25.00173077	20.62396293	22.67149457	20.7143152	-0.263599557	6.24E-05	0.000314126	LOC100163234	NC_042494.1	78731750	78792876	+	4742	protein_coding	uncharacterized LOC100163234%2C transcript variant X1	-
100159060	30.16712559	35.14363846	33.52801093	24.22421852	22.66192436	23.95438597	-0.472827057	6.17E-06	3.63E-05	LOC100159060	NC_042496.1	8099972	8102932	+	731	protein_coding	U6 snRNA-associated Sm-like	LSM
100169616	34.94537649	37.40595958	37.40087273	19.03007077	22.64856367	20.19587725	-0.819462784	1.34E-17	2.52E-16	LOC100169616	NC_042496.1	36843086	36849708	+	1009	protein_coding	serine 3-dehydrogenase-like	adh_short
100163461	17.95061203	17.74027115	17.9350066	23.37488289	22.62380916	23.88660626	0.388724546	3.61E-05	0.000189256	LOC100163461	NC_042496.1	4503869	4505315	+	1119	protein_coding	translocator protein-like	-
100161026	14.50470853	15.23715783	15.42258151	21.55088666	22.61152731	22.25415943	0.563624894	4.58E-17	8.33E-16	LOC100161026	NC_042494.1	39338006	39366938	-	3851	protein_coding	uncharacterized LOC100161026%2C transcript variant X3	-
100573350	32.33019051	33.81449593	35.12370551	25.25807967	22.60015242	24.05223219	-0.486548896	3.24E-10	3.24E-09	LOC100573350	NC_042494.1	93808367	93814084	-	1887	protein_coding	putative uncharacterized protein DDB_G0271606	-
100166756	19.95041956	18.96180353	20.07680429	22.28732345	22.59367869	21.47987931	0.176778146	0.008245699	0.025280294	LOC100166756	NC_042494.1	99549218	99575369	+	3651	protein_coding	1-phosphatidylinositol 4%2C5-bisphosphate phosphodiesterase classes I and II	PI-PLC-X
100163426	29.30234157	31.96344211	29.82804591	24.49798479	22.53143734	21.95509964	-0.393913563	6.94E-08	5.31E-07	LOC100163426	NC_042493.1	75658549	75663489	-	2907	protein_coding	WD repeat-containing protein 36	WD40
100161940	18.33520054	18.07959802	19.1424234	22.22640148	22.50236789	21.83960929	0.268094233	0.000276574	0.001220219	LOC100161940	NC_042493.1	80380874	80385697	+	2369	protein_coding	repressor of RNA polymerase III transcription MAF1 homolog	-
100163518	17.98162966	18.76070717	18.5205674	22.89116351	22.46481807	25.20425497	0.359318154	0.002312733	0.008255203	LOC100163518	NC_042494.1	99364488	99406112	-	658	protein_coding	uncharacterized LOC100163518	-
100162568	30.55819861	30.66083272	28.23770333	21.49175822	22.41408452	21.82319638	-0.43830554	5.17E-10	5.06E-09	LOC100162568	NC_042496.1	29522447	29534359	+	2583	protein_coding	acyl-CoA synthetase family member 2%2C mitochondrial	AMP-binding
100167635	18.16879178	19.04513056	18.94949526	22.39016726	22.37290451	24.20935017	0.303361421	4.54E-05	0.000234429	LOC100167635	NC_042494.1	157489104	157493741	-	2527	protein_coding	uncharacterized LOC100167635%2C transcript variant X2	-
100164010	25.93982728	29.06338385	26.46256736	22.74944674	22.30164214	23.91391535	-0.233448433	0.00237766	0.008448235	LOC100164010	NC_042494.1	92270798	92277502	-	2217	protein_coding	U3 small nucleolar RNA-associated protein 6 homolog	-
100166616	28.21222087	31.73654788	27.89971079	23.97681927	22.28465117	22.61167349	-0.3441665	6.41E-05	0.000322211	LOC100166616	NC_042495.1	44412130	44417144	+	1502	protein_coding	DNA-(apurinic or apyrimidinic site) lyase	Exo_endo_phos
100160482	15.830916	16.96558838	16.51936168	24.48014383	22.26963538	22.8168499	0.503586668	2.88E-12	3.49E-11	LOC100160482	NC_042494.1	56494185	56532205	-	3439	protein_coding	tyrosine-protein kinase Fer%2C transcript variant X3	Pkinase_Tyr
100163101	25.09667962	24.6456461	23.54214132	22.26086339	22.25717702	21.92379255	-0.134825001	0.016282067	0.04528154	LOC100163101	NC_042495.1	76678274	76697034	-	8317	protein_coding	eIF-2-alpha kinase activator GCN1%2C transcript variant X2	-
100575509	28.07545914	27.18566207	28.22805504	23.20919042	22.25120005	21.97281545	-0.301248274	4.73E-07	3.23E-06	LOC100575509	NC_042495.1	52208757	52246364	+	5179	protein_coding	uncharacterized LOC100575509	EGF_CA
100158734	25.83803315	27.81748063	27.53348364	22.07407617	22.22440671	22.49693722	-0.274322189	4.47E-05	0.0002314	LOC100158734	NC_042496.1	9879285	9885905	-	2886	protein_coding	nucleolar protein 14%2C transcript variant X1	-
100165679	27.22534841	26.95694395	25.2517653	24.14549779	22.2036675	23.24306102	-0.18445167	0.011144032	0.032674112	Ufd1l	NC_042493.1	18707542	18713521	+	2596	protein_coding	ubiquitin fusion degradation 1 like%2C transcript variant X2	UFD1
100166868	26.49726253	28.3064475	28.28806995	22.95728581	22.19417854	22.93222113	-0.28010823	0.000167138	0.000770713	LOC100166868	NC_042496.1	14467579	14488072	+	1933	protein_coding	uncharacterized LOC100166868	-
100163482	28.51611963	27.40471832	25.3189543	21.93940002	22.14773886	22.78977305	-0.274581836	0.000115083	0.000549703	LOC100163482	NC_042494.1	140316597	140319844	-	3176	protein_coding	DNA replication licensing factor MCM4	MCM
100571179	9.725858671	9.335921705	12.14309842	20.2350906	22.14537523	24.42474193	1.107550226	3.73E-14	5.41E-13	LOC100571179	NC_042494.1	152562508	152564164	+	679	protein_coding	lipopolysaccharide-induced tumor necrosis factor-alpha factor homolog	-
100165050	18.5432509	18.70111184	17.88394413	24.06726209	22.12689368	21.87763141	0.310975355	1.85E-05	0.000101866	LOC100165050	NC_042496.1	2243940	2259440	+	3131	protein_coding	endothelin-converting enzyme homolog	-
100160330	24.17893211	25.37026487	25.12906214	21.24592868	22.12321943	22.0537231	-0.183824648	0.014189957	0.040250802	LOC100160330	NC_042494.1	86564727	86568017	+	1920	protein_coding	TATA-box-binding protein	-
100168277	27.49335338	31.98152005	30.33299911	25.65111761	22.09764345	25.07070642	-0.295023412	0.003147596	0.010842713	LOC100168277	NC_042494.1	147248177	147253682	-	1038	protein_coding	vacuolar protein-sorting-associated protein 25	-
100166096	26.99002088	26.05482333	27.26716386	20.89004938	22.08096661	21.68294766	-0.306055152	0.000162211	0.000750281	LOC100166096	NC_042494.1	119336614	119356382	-	1487	protein_coding	CG9186-like	-
103308562	15.3539572	17.83088974	17.76880017	20.17990788	22.05753103	20.34518507	0.304376486	0.000215007	0.0009703	LOC103308562	NC_042495.1	64216824	64232741	+	3085	protein_coding	glutamate receptor ionotropic%2C kainate 2%2C transcript variant X1	Lig_chan
100575625	2.593019921	2.711194129	1.819053646	23.17051608	22.05046238	25.55364474	3.31155	2.10E-94	5.41E-92	LOC100575625	NC_042494.1	43739245	43741172	-	1046	protein_coding	proliferation-associated protein 2G4-like	Peptidase_M24
100168167	27.63438066	25.5532107	26.18884367	19.4569716	22.04633464	20.11259472	-0.358993313	1.98E-05	0.000108286	LOC100168167	NC_042493.1	3324868	3327058	-	1761	protein_coding	leucine-rich repeat extensin-like protein 5%2C transcript variant X3	-
100161603	35.93325964	36.35548378	35.03603716	23.7697765	22.023184	21.21472277	-0.672671491	9.70E-19	1.97E-17	Su(var)3-9	NC_042494.1	93786565	93790547	+	1840	protein_coding	suppressor of variegation 3-9	SET
100165348	11.15289066	12.63638783	12.51413198	22.77389648	22.011419	22.99820803	0.908832799	1.12E-24	3.21E-23	LOC100165348	NC_042494.1	133766536	133770942	+	1868	protein_coding	ras association domain-containing protein 4%2C transcript variant X2	LIM
100165445	18.29886771	18.31927701	17.16618171	22.48850939	21.98728993	21.60435257	0.303376539	3.85E-05	0.000201049	LOC100165445	NC_042494.1	16959469	16966727	+	2552	protein_coding	early endosome antigen 1%2C transcript variant X2	FYVE
100166823	31.35535936	30.73504787	31.38718619	24.90588871	21.98052398	24.50113198	-0.382229634	2.27E-06	1.42E-05	LOC100166823	NC_042494.1	110340248	110343616	+	1631	protein_coding	G2/mitotic-specific cyclin-B	Cyclin_C
100572275	25.90161156	26.30116989	26.25152729	19.13784491	21.95887551	20.78038314	-0.335650047	2.57E-06	1.60E-05	LOC100572275	NC_042494.1	71014059	71031212	+	3360	protein_coding	uncharacterized protein DDB_G0286591	Exonuc_X-T
100158928	38.49923367	36.01512186	37.57766619	19.79717883	21.94896704	20.09528437	-0.851350264	5.13E-26	1.55E-24	LOC100158928	NC_042494.1	67963705	67970018	-	1554	protein_coding	ejaculatory bulb-specific protein 3	-
100164325	28.79962385	24.51205909	25.70257394	21.97922254	21.89711109	20.55947084	-0.288059307	0.000512946	0.002155769	LOC100164325	NC_042496.1	10803403	10811560	-	2450	protein_coding	cyclin-dependent kinase 4%2C transcript variant X2	Pkinase
100160721	15.91515034	14.92859405	16.2167351	23.15541643	21.88948316	23.62607942	0.552036135	5.49E-13	7.19E-12	LOC100160721	NC_042494.1	50534970	50541637	-	2707	protein_coding	UDP-glucuronosyltransferase 2C1%2C transcript variant X2	UDPGT
107882152	12.87012103	12.69830599	12.65230085	21.10124691	21.88320466	22.38628286	0.780848951	6.93E-34	2.95E-32	LOC107882152	NC_042495.1	13923638	13965615	-	4841	protein_coding	probable multidrug resistance-associated protein lethal(2)03659	ABC_tran
100161010	27.49292765	28.09698601	25.91346903	24.58986917	21.85224552	22.67944437	-0.231028339	0.001211429	0.004648032	LOC100161010	NC_042494.1	105477310	105484446	-	3736	protein_coding	kinesin-like protein Klp61F	Kinesin
100168946	0.332690641	0.407270947	0.796343519	21.75151956	21.81902516	23.94896493	5.492484871	3.26E-135	2.24E-132	LOC100168946	NC_042493.1	58392935	58437760	-	1536	protein_coding	legumain-like%2C transcript variant X1	-
100166695	16.62307312	17.01379447	17.53022032	22.11320873	21.80182738	20.96871406	0.349959608	2.12E-07	1.52E-06	LOC100166695	NC_042495.1	37629353	37633164	-	3618	protein_coding	neurocalcin homolog	-
100161958	41.61182061	48.59581608	44.31889634	17.89372317	21.78357922	22.126316	-1.115254547	5.70E-31	2.19E-29	LOC100161958	NC_042495.1	105495455	105504098	-	1519	protein_coding	uncharacterized LOC100161958%2C transcript variant X2	-
100161816	17.49420254	17.35805236	17.63895879	20.32538904	21.76165907	20.68419668	0.264883103	5.27E-05	0.000268999	LOC100161816	NC_042495.1	13700928	13727733	+	4058	protein_coding	uncharacterized LOC100161816%2C transcript variant X1	Aminotran_5
103309867	25.08031133	24.78642637	24.64499451	21.43770419	21.75036517	22.06701649	-0.18475847	0.003658938	0.012387781	LOC103309867	NC_042494.1	43076367	43079684	-	3318	protein_coding	RNA-binding protein 26	-
100166524	26.21733026	25.71678207	26.55652966	18.57998946	21.74351871	19.52126914	-0.384563861	1.11E-08	9.39E-08	LOC100166524	NC_042494.1	113112040	113169322	+	10215	protein_coding	myosin 15%2C transcript variant X3	Myosin_head
100162944	29.37297298	34.50593782	31.95090688	21.89360901	21.74093243	20.94720938	-0.561944475	5.58E-14	7.93E-13	LOC100162944	NC_042495.1	101831913	101857593	-	3169	protein_coding	uncharacterized LOC100162944	-
100159872	30.97130256	33.64205298	31.00017272	19.05000955	21.74044773	22.45246914	-0.589757075	4.81E-11	5.20E-10	LOC100159872	NC_042494.1	87070663	87073204	+	1438	protein_coding	uncharacterized LOC100159872	-
100163547	24.7774815	25.90782562	25.33358144	23.28725163	21.72649192	20.90911032	-0.19849477	0.001550952	0.005798428	LOC100163547	NC_042495.1	34707199	34726561	+	6917	protein_coding	uncharacterized LOC100163547%2C transcript variant X2	FHA
100167803	19.13557446	17.63304716	18.08288496	21.89794413	21.71424836	20.86756668	0.239780853	0.000435077	0.001854691	LOC100167803	NC_042495.1	3764124	3779069	-	4016	protein_coding	anoctamin-1	-
100160145	17.26453394	17.79434897	18.36160934	19.872673	21.69216716	20.44479268	0.222552777	0.015328699	0.042980959	LOC100160145	NC_042495.1	75681582	75687701	+	1357	protein_coding	enoyl-CoA hydratase domain-containing protein 3%2C mitochondrial%2C transcript variant X5	ECH
100165421	58.93385745	56.80233278	59.01501483	15.35220999	21.67944209	17.47283106	-1.674094242	5.12E-57	5.11E-55	LOC100165421	NC_042493.1	49073221	49081762	+	1348	protein_coding	uncharacterized LOC100165421	-
100573180	10.11526262	11.45629737	12.88752623	21.77495587	21.67643128	21.07196127	0.914827502	4.85E-14	6.95E-13	LOC100573180	NC_042495.1	85517224	85519190	+	921	lncRNA	uncharacterized LOC100573180	-
100167996	19.19347611	17.80192393	18.13683237	21.9360633	21.6700468	19.87847688	0.210181598	0.00072905	0.002942496	LOC100167996	NC_042495.1	51298885	51370060	+	18594	protein_coding	obscurin%2C transcript variant X7	Pkinase
100162902	5.654486173	5.536172253	4.609935961	20.2690694	21.65087539	22.31893901	2.02719119	2.15E-85	4.53E-83	LOC100162902	NC_042495.1	954698	958982	-	2162	protein_coding	thymidine phosphorylase%2C transcript variant X1	Glycos_trans_3N
100158828	33.41593754	34.13048586	33.01299121	21.99187452	21.60380471	23.47203319	-0.577812524	3.37E-16	5.78E-15	LOC100158828	NC_042494.1	119107566	119117584	-	2208	protein_coding	nuclear pore complex protein Nup85	-
100162786	23.86598355	22.75630916	23.65235379	18.99396315	21.5979966	20.96565282	-0.184491491	0.015406697	0.043158994	LOC100162786	NC_042496.1	30255396	30260526	+	2716	protein_coding	ras-related protein Rab-35	Ras
[truncated: 3,994 more rows]
